# Supplementary material for: LIN37-DREAM Prevents DNA End Resection and Homologous Recombination at DNA Double Strand Breaks in Quiescent Cells
Source: bioRxiv preprint, doi:10.1101/2021.04.21.440786, version 1 (2021-04-21)
Supplement: RPA screen in Lig4 KO cells [file 440786_file03.xlsx]

## Sheet: Illumina_RPA screen
	guide_sequence	gRNA_ID	gene	Normalized_PRA high	Normalized_RPA low	Normalized_unsorted	RPA hi vs low	RPA Hi vs unsorted
3	ACTCTATCACATCACACTG	0610007P14Rik_CCDS26063.1_ex1_12:85816413-85816435:-_5-3	0610007P14Rik	5.30735	4.12957	4.54684	1.28521	1.16726
2	GAAGTGTCCCAGGGCGAGG	0610007P14Rik_CCDS26063.1_ex1_12:85816385-85816407:+_5-2	0610007P14Rik	8.65407	8.21774	8.38924	1.0531	1.03157
1	AAATACAAACAACTCTGAG	0610007P14Rik_CCDS26063.1_ex1_12:85816364-85816386:+_5-1	0610007P14Rik	3.23115	3.14277	3.29888	1.02812	0.979469
4	AGCCCGGACCTTTGGGATC	0610007P14Rik_CCDS26063.1_ex2_12:85819535-85819557:-_5-4	0610007P14Rik	23.4044	25.3599	24.3172	0.922893	0.962466
5	TCTACGAGAAGCTCTACAC	0610007P14Rik_CCDS26063.1_ex3_12:85822102-85822124:-_5-5	0610007P14Rik	3.26214	3.90401	3.16751	0.835585	1.02987
10	TTCATAGCTCATGCTGCTC	0610009B22Rik_CCDS36149.1_ex0_11:51685931-51685953:-_5-5	0610009B22Rik	12.9304	9.00718	10.1627	1.43557	1.27235
7	CGTCACGGCTGGGCACATG	0610009B22Rik_CCDS36149.1_ex0_11:51685824-51685846:-_5-2	0610009B22Rik	32.1741	24.0065	28.9806	1.34022	1.11019
9	CCACATGTTTTCGTCGACG	0610009B22Rik_CCDS36149.1_ex0_11:51685907-51685929:+_5-4	0610009B22Rik	13.5192	10.2195	12.2316	1.32288	1.10527
8	TTCGTCTCGGCGTTCGTCA	0610009B22Rik_CCDS36149.1_ex0_11:51685838-51685860:-_5-3	0610009B22Rik	19.0041	17.7756	17.5847	1.06911	1.08072
6	CTGCATGACGTGAGGCACG	0610009B22Rik_CCDS36149.1_ex0_11:51685793-51685815:-_5-1	0610009B22Rik	11.7529	11.8266	13.3482	0.993767	0.880482
13	GGAATACACCTGAAACCAG	0610009D07Rik_CCDS25791.1_ex2_12:4826759-4826781:+_5-3	0610009D07Rik	1.80569	1.62027	1.59114	1.11444	1.13484
11	ATGATATATTTGGGAAATA	0610009D07Rik_CCDS25791.1_ex1_12:4820669-4820691:+_5-1	0610009D07Rik	1.09296	1.19736	1.29557	0.912812	0.843617
15	AATCCTGATAGGTGGTCGC	0610009D07Rik_CCDS25791.1_ex2_12:4826826-4826848:-_5-5	0610009D07Rik	6.20601	7.20274	8.12651	0.861617	0.763674
14	ACAGCCTATGTGGTCTATG	0610009D07Rik_CCDS25791.1_ex2_12:4826782-4826804:+_5-4	0610009D07Rik	9.24285	12.1931	9.80141	0.758037	0.943012
12	ACACTCTGATTTGACGAAT	0610009D07Rik_CCDS25791.1_ex1_12:4820693-4820715:-_5-2	0610009D07Rik	1.58877	2.74805	2.74058	0.578147	0.579723
17	CCACGGTTCAAAGAGGAGC	0610009O20Rik_CCDS50260.1_ex2_18:38251291-38251313:+_5-2	0610009O20Rik	10.4824	9.51468	11.1479	1.10171	0.940301
19	GAAGTCTCGGCTAGCATGC	0610009O20Rik_CCDS50260.1_ex5_18:38254299-38254321:-_5-4	0610009O20Rik	54.0827	51.4114	53.9727	1.05196	1.00204
18	ATCCACTTCCACGCCCCTC	0610009O20Rik_CCDS50260.1_ex3_18:38252859-38252881:+_5-3	0610009O20Rik	13.0544	13.1799	13.9065	0.990475	0.938723
16	CCTAGTGAGCGGCAGGGTA	0610009O20Rik_CCDS50260.1_ex1_18:38251165-38251187:-_5-1	0610009O20Rik	16.8969	20.6232	21.1973	0.819315	0.797128
20	CCGAGGCCCACCCCCCTGG	0610009O20Rik_CCDS50260.1_ex5_18:38254339-38254361:+_5-5	0610009O20Rik	13.9221	23.1889	18.1759	0.600376	0.765963
21	ATCAGCTATGCGTGTAAGA	0610010F05Rik_CCDS36119.1_ex14_11:23615151-23615173:+_5-1	0610010F05Rik	14.9757	10.3323	12.9542	1.4494	1.15605
25	CCTCTTTGGGCGTTAATCC	0610010F05Rik_CCDS36119.1_ex19_11:23628871-23628893:+_5-5	0610010F05Rik	10.2035	10.9244	9.73573	0.934009	1.04805
23	ACATAGTATAGCTACCACA	0610010F05Rik_CCDS36119.1_ex17_11:23622504-23622526:-_5-3	0610010F05Rik	7.07368	8.78162	8.25788	0.805509	0.856598
22	TATGTTAAACGGAACACTA	0610010F05Rik_CCDS36119.1_ex16_11:23620259-23620281:-_5-2	0610010F05Rik	1.58877	2.09958	2.01807	0.756712	0.787273
24	ATAACCCTTTAATGGCTAC	0610010F05Rik_CCDS36119.1_ex18_11:23625043-23625065:-_5-4	0610010F05Rik	3.38609	6.77983	5.43354	0.499436	0.623182
33	GACGGAGATAGAGATGCTG	0610010K14Rik_CCDS48833.1_ex2_11:70236942-70236964:-_9-6	0610010K14Rik	20.2127	13.9694	14.4977	1.44693	1.3942
28	GACCCAAGAAGATGACGTC	0610010K14Rik_CCDS24940.1_ex2_11:70236110-70236132:-_9-3	0610010K14Rik	12.4656	13.7438	10.8852	0.906998	1.14519
27	GCTCCAGTGTCCCTGAAGC	0610010K14Rik_CCDS24940.1_ex2_11:70236053-70236075:-_9-2	0610010K14Rik	15.6574	17.4373	16.6652	0.897927	0.939527
30	TACACTTTTCGCTTCACAG	0610010K14Rik_CCDS24940.1_ex2_11:70236175-70236197:+_9-5	0610010K14Rik	6.79478	7.71024	7.0756	0.881268	0.960312
26	CCTTCTGTTTCTTTATGGG	0610010K14Rik_CCDS24940.1_ex2_11:70236026-70236048:+_9-1	0610010K14Rik	25.7905	30.745	28.1924	0.838853	0.914804
34	CCCTTCCGACAGTGCCAAG	0610010K14Rik_CCDS48833.1_ex2_11:70236969-70236991:-_9-7	0610010K14Rik	15.5025	19.2699	16.2054	0.804491	0.956622
32	TCTCGGACTCTTCCCCTGC	0610010K14Rik_CCDS24940.1_ex3_11:70237531-70237553:-_9-9	0610010K14Rik	12.7755	16.2249	15.877	0.7874	0.804654
29	CTTGGGTGACTCAGCTGGA	0610010K14Rik_CCDS24940.1_ex2_11:70236135-70236157:+_9-4	0610010K14Rik	10.0795	13.5465	11.8704	0.744071	0.849132
31	CTGGTCTCACGTACCCGGC	0610010K14Rik_CCDS24940.1_ex3_11:70237516-70237538:+_9-8	0610010K14Rik	15.0376	21.9484	21.657	0.685137	0.694353
38	GCTGTACCTGGACGTGACC	0610011F06Rik_CCDS28536.1_ex1_17:25876007-25876029:+_5-4	0610011F06Rik	43.8566	31.5344	36.4355	1.39075	1.20368
37	AGCGTTGGTCCACGTCCGA	0610011F06Rik_CCDS28536.1_ex0_17:25875695-25875717:-_5-3	0610011F06Rik	22.4748	19.6646	21.0987	1.1429	1.06522
36	TGCCACTCGGCATTCGGGA	0610011F06Rik_CCDS28536.1_ex0_17:25875672-25875694:-_5-2	0610011F06Rik	21.7931	19.5518	18.8655	1.11463	1.15518
35	TCGGGCTCTGGACAGCACG	0610011F06Rik_CCDS28536.1_ex0_17:25875634-25875656:+_5-1	0610011F06Rik	11.5979	10.9244	9.73573	1.06166	1.19128
39	CAGGTCCAGCGATCGGGGT	0610011F06Rik_CCDS28536.1_ex1_17:25876053-25876075:-_5-5	0610011F06Rik	20.1197	20.3977	20.9674	0.986372	0.959571
41	ATTGTCCTGCCACCGGGTC	0610012H03Rik_CCDS38191.1_ex1_2:105297873-105297895:-_5-2	0610012H03Rik	17.6716	13.5747	17.1578	1.30181	1.02995
42	GTACACAGCGTTGTTCACG	0610012H03Rik_CCDS38191.1_ex1_2:105297906-105297928:-_5-3	0610012H03Rik	9.86261	7.68205	9.93277	1.28385	0.992937
44	GGGTGTATGGAACTTGCAC	0610012H03Rik_CCDS38191.1_ex2_2:105378690-105378712:-_5-5	0610012H03Rik	9.3668	10.8398	9.17743	0.864111	1.02063
43	TGCTGACATCCCCCCAGGT	0610012H03Rik_CCDS38191.1_ex2_2:105378652-105378674:+_5-4	0610012H03Rik	14.8827	20.5668	21.0002	0.723626	0.708692
40	GCGAGCCGAAGATCCCCAC	0610012H03Rik_CCDS38191.1_ex1_2:105297818-105297840:+_5-1	0610012H03Rik	19.6859	27.841	23.0035	0.707082	0.855776
46	AGGGACGACTACGACAAGA	0610030E20Rik_CCDS51808.1_ex1_6:72347590-72347612:+_5-2	0610030E20Rik	6.36095	3.76304	4.02138	1.69038	1.58178
47	CAGTCTGGGTTCACGGGGT	0610030E20Rik_CCDS51808.1_ex2_6:72348538-72348560:-_5-3	0610030E20Rik	10.6063	9.09176	10.5896	1.16659	1.00158
49	TTCTGTTTAGACTATGAGG	0610030E20Rik_CCDS51808.1_ex2_6:72348623-72348645:+_5-5	0610030E20Rik	4.68759	5.62386	4.74388	0.833518	0.988134
45	CCGATCGAGCTGGTTCCGA	0610030E20Rik_CCDS51808.1_ex0_6:72347495-72347517:-_5-1	0610030E20Rik	12.6206	16.3377	15.5158	0.772481	0.813403
48	GCTCCGAGCTAGAGCCTCC	0610030E20Rik_CCDS51808.1_ex2_6:72348591-72348613:+_5-4	0610030E20Rik	6.7638	8.78162	7.14128	0.770222	0.947141
52	GACAGCACCAATGCGTCCG	0610031J06Rik_CCDS17469.1_ex2_3:88326126-88326148:+_5-3	0610031J06Rik	5.58625	3.50929	4.54684	1.59184	1.2286
53	ACTTGGCCAAGGAGTACGG	0610031J06Rik_CCDS17469.1_ex2_3:88326175-88326197:-_5-4	0610031J06Rik	6.88775	7.56927	8.02799	0.909962	0.857967
50	TATGGAGGTTATTTCCGGC	0610031J06Rik_CCDS17469.1_ex1_3:88325681-88325703:+_5-1	0610031J06Rik	10.2655	11.4601	12.5929	0.895758	0.815178
51	CTGCTTCATATTCGGGCAG	0610031J06Rik_CCDS17469.1_ex1_3:88325718-88325740:+_5-2	0610031J06Rik	9.58372	10.8116	10.8852	0.886428	0.880439
54	GGTCGACCAGATCTAGAAA	0610031J06Rik_CCDS17469.1_ex3_3:88326418-88326440:-_5-5	0610031J06Rik	2.0536	2.86082	2.54353	0.717834	0.807381
59	TGGCAATACATCCGGCTGA	0610037L13Rik_CCDS18442.1_ex1_4:107891500-107891522:+_5-5	0610037L13Rik	12.4036	8.33052	11.0494	1.48894	1.12257
55	AGTGCGATTTTCTGAGAAG	0610037L13Rik_CCDS18442.1_ex0_4:107890108-107890130:-_5-1	0610037L13Rik	4.84253	4.29873	4.18558	1.1265	1.15695
58	GACTTCCGGTGGTACCTGA	0610037L13Rik_CCDS18442.1_ex0_4:107890181-107890203:+_5-4	0610037L13Rik	6.4849	5.96219	6.97708	1.08767	0.929459
56	TTCGTGACGTTCTCCAGCG	0610037L13Rik_CCDS18442.1_ex0_4:107890141-107890163:-_5-2	0610037L13Rik	7.63147	7.48469	10.1955	1.01961	0.748513
57	GTCCTCGCCCACTGGCCGA	0610037L13Rik_CCDS18442.1_ex0_4:107890163-107890185:-_5-3	0610037L13Rik	18.9731	25.2471	19.6866	0.751498	0.96376
60	AGAGCAGAGGCAGTACAAC	0610040J01Rik_CCDS39092.1_ex1_5:63898115-63898137:+_5-1	0610040J01Rik	14.9137	12.898	12.3302	1.15628	1.20953
63	TTTGAAAACCACTCTGAGG	0610040J01Rik_CCDS39092.1_ex1_5:63898540-63898562:+_5-5	0610040J01Rik	7.32158	6.80802	7.10844	1.07543	1.02998
89555	CCTTGAAGGAGAAGACTAC	0610040J01Rik_CCDS39092.1_ex1_5:63898338-63898360:+_5-4	0610040J01Rik	1	1	1	1	1
62	GTCTATGGTGGCTACCCAG	0610040J01Rik_CCDS39092.1_ex1_5:63898294-63898316:-_5-3	0610040J01Rik	16.5561	20.3413	17.9788	0.813914	0.920864
61	CCAGGAGCTATTGTCAACC	0610040J01Rik_CCDS39092.1_ex1_5:63898264-63898286:-_5-2	0610040J01Rik	6.88775	8.69704	6.97708	0.791965	0.987197
65	GAGCTCTGCCGTGGTGACT	1100001G20Rik_CCDS36258.1_ex1_11:83749243-83749265:+_2-2	1100001G20Rik	17.1138	16.9298	16.0412	1.01087	1.06687
64	ACGTACCTAAAAGCTGCAG	1100001G20Rik_CCDS36258.1_ex0_11:83747108-83747130:-_2-1	1100001G20Rik	8.62309	11.0936	7.46969	0.777306	1.15441
69	ATGGATTTGTAATAAACTG	1110001A16Rik_CCDS50183.1_ex2_17:78919753-78919775:-_4-4	1110001A16Rik	3.01423	1.78944	2.2808	1.68445	1.32157
66	AAAAGATGCACTCCAGCCA	1110001A16Rik_CCDS50183.1_ex0_17:78918451-78918473:+_4-1	1110001A16Rik	7.69344	4.69345	6.45162	1.63919	1.19248
68	AATTTCCATTCATTTTGGA	1110001A16Rik_CCDS50183.1_ex1_17:78919079-78919101:+_4-3	1110001A16Rik	4.84253	4.4397	4.6782	1.09073	1.03513
67	GAGCTGAGTTTACCTTGGC	1110001A16Rik_CCDS50183.1_ex0_17:78918464-78918486:-_4-2	1110001A16Rik	15.3785	17.1835	14.9575	0.894956	1.02815
70	CGGCCATATCGCGACACAG	1110001J03Rik_CCDS20014.1_ex0_6:38534950-38534972:+_5-1	1110001J03Rik	16.3081	11.5729	13.2826	1.40917	1.22779
71	GCCTTAACGAGGTACCGGT	1110001J03Rik_CCDS20014.1_ex0_6:38534973-38534995:-_5-2	1110001J03Rik	7.60048	5.70845	6.87855	1.33144	1.10495
73	TTGCCGGATGCTACTCAAA	1110001J03Rik_CCDS20014.1_ex1_6:38539224-38539246:-_5-4	1110001J03Rik	6.4849	6.10317	7.0756	1.06255	0.916517
74	CAACATGTAGCCCTTCATC	1110001J03Rik_CCDS20014.1_ex1_6:38539242-38539264:+_5-5	1110001J03Rik	6.36095	8.4151	6.55014	0.755897	0.971117
72	TTTCCGAGCACATCGGGTA	1110001J03Rik_CCDS20014.1_ex0_6:38534994-38535016:+_5-3	1110001J03Rik	8.49913	16.3377	9.11175	0.520216	0.932767
77	ATCGAAGAGCTGAAACTGA	1110004E09Rik_CCDS28321.1_ex5_16:90931072-90931094:-_5-3	1110004E09Rik	2.61138	1.36653	2.05091	1.91097	1.27328
76	TTTTACGAAGGACGAGATC	1110004E09Rik_CCDS28321.1_ex5_16:90931010-90931032:-_5-2	1110004E09Rik	2.92127	1.84583	1.95239	1.58263	1.49625
79	AGGTGGCCCGCGTCTACAA	1110004E09Rik_CCDS28321.1_ex6_16:90934611-90934633:-_5-5	1110004E09Rik	3.75795	3.50929	3.98854	1.07086	0.942186
78	CACCGGCTCTGCTCAGGTG	1110004E09Rik_CCDS28321.1_ex6_16:90934576-90934598:-_5-4	1110004E09Rik	37.0082	42.1355	34.8591	0.878316	1.06165
75	GCACCTCGAAGCTGGTCCA	1110004E09Rik_CCDS28321.1_ex3_16:90927437-90927459:+_5-1	1110004E09Rik	4.68759	7.11816	6.35309	0.65854	0.737844
83	CAAACTGTCAGGACGGTAC	1110004F10Rik_CCDS21766.1_ex3_7:116103271-116103293:+_5-4	1110004F10Rik	8.46815	5.28553	6.45162	1.60214	1.31256
81	CAACATCTCACTTCCGAAC	1110004F10Rik_CCDS21766.1_ex2_7:116101983-116102005:+_5-2	1110004F10Rik	8.80902	6.49789	7.86378	1.35567	1.1202
82	AAGAAAATTAATGAAGAGC	1110004F10Rik_CCDS21766.1_ex3_7:116103221-116103243:+_5-3	1110004F10Rik	1.55779	1.28194	1.5583	1.21518	0.999672
84	TTTAGGTAGAAGATCATGA	1110004F10Rik_CCDS21766.1_ex4_7:116104206-116104228:+_5-5	1110004F10Rik	2.5804	2.4943	2.14944	1.03452	1.2005
80	TCTTGAGACTCATGGGTGC	1110004F10Rik_CCDS21766.1_ex1_7:116099497-116099519:+_5-1	1110004F10Rik	41.9044	50.3682	37.3551	0.831961	1.12179
87	ACGCTGCTGTAGATGGCTC	1110007C09Rik_CCDS49260.1_ex3_13:49205279-49205301:+_5-3	1110007C09Rik	22.01	15.5201	16.1726	1.41816	1.36094
89	GCCTTGGGGTTCCGGAACT	1110007C09Rik_CCDS49260.1_ex3_13:49205328-49205350:+_5-5	1110007C09Rik	12.6515	10.2195	11.3778	1.23798	1.11195
88	GTCACAGAGCCGTACGCGC	1110007C09Rik_CCDS49260.1_ex3_13:49205303-49205325:+_5-4	1110007C09Rik	22.1339	21.9766	23.8574	1.00716	0.92776
85	TACGAGGAGAGTAGCGGCT	1110007C09Rik_CCDS49260.1_ex3_13:49205188-49205210:+_5-1	1110007C09Rik	10.8232	11.9958	9.24311	0.902255	1.17095
86	CGTGGGGAACGGCACTGTC	1110007C09Rik_CCDS49260.1_ex3_13:49205261-49205283:-_5-2	1110007C09Rik	13.6432	15.3791	13.3811	0.887125	1.01959
94	CAGAACTCCTGCATTGATC	1110008F13Rik_CCDS16970.1_ex2_2:156872344-156872366:-_5-5	1110008F13Rik	19.8408	15.4355	16.1726	1.2854	1.22682
93	TTCCCAAGAAGCCTCGCAA	1110008F13Rik_CCDS16970.1_ex1_2:156865332-156865354:-_5-4	1110008F13Rik	12.8065	10.6988	11.3121	1.197	1.13211
92	GGGGCGTTTTGCCCTTGCG	1110008F13Rik_CCDS16970.1_ex1_2:156865320-156865342:+_5-3	1110008F13Rik	16.711	16.0558	15.8442	1.04081	1.05471
90	GACGCGGCCTGGGACGACA	1110008F13Rik_CCDS16970.1_ex0_2:156863396-156863418:+_5-1	1110008F13Rik	12.4346	12.0804	11.542	1.02933	1.07734
91	TTCCGACAGATCATCGCTC	1110008F13Rik_CCDS16970.1_ex1_2:156865283-156865305:+_5-2	1110008F13Rik	10.1105	10.3323	9.6372	0.978534	1.04911
97	GTGACTCATCGCAGTAGGA	1110008J03Rik_CCDS51635.1_ex0_5:120609924-120609946:+_5-3	1110008J03Rik	31.2135	14.0822	15.1545	2.21653	2.05968
99	GTAACCGATCCAGAGGAGT	1110008J03Rik_CCDS51635.1_ex1_5:120611480-120611502:-_5-5	1110008J03Rik	3.13818	2.07138	2.14944	1.51502	1.46
95	GAGGGGTCTCGGATGGCCG	1110008J03Rik_CCDS51635.1_ex0_5:120609886-120609908:-_5-1	1110008J03Rik	22.2889	18.9316	23.2006	1.17734	0.960703
98	GAGAGCCCTTCGGTGGTCC	1110008J03Rik_CCDS51635.1_ex1_5:120611456-120611478:+_5-4	1110008J03Rik	20.5535	20.6796	19.8179	0.993903	1.03712
96	CTGTTTGGCACTAGCAAGG	1110008J03Rik_CCDS51635.1_ex0_5:120609904-120609926:-_5-2	1110008J03Rik	13.5502	15.3227	13.5781	0.884322	0.997943
102	GCAAAGAACAATGGCATCG	1110008L16Rik_CCDS49068.1_ex0_12:55304396-55304418:+_5-3	1110008L16Rik	6.02008	4.83442	5.20366	1.24525	1.15689
100	CATCTTTGTTGGTTCCCGA	1110008L16Rik_CCDS49068.1_ex0_12:55304014-55304036:-_5-1	1110008L16Rik	2.20854	1.90222	1.85387	1.16103	1.19131
104	TTTTAGAGTTTCCAACGGA	1110008L16Rik_CCDS49068.1_ex0_12:55304726-55304748:-_5-5	1110008L16Rik	1.37186	1.42291	1.78819	0.964118	0.767179
101	CTAAGAAGAGGTCCCACAT	1110008L16Rik_CCDS49068.1_ex0_12:55304172-55304194:+_5-2	1110008L16Rik	6.08206	7.99218	7.17412	0.761001	0.847777
103	GTTATACCCTTCTCATCCG	1110008L16Rik_CCDS49068.1_ex0_12:55304532-55304554:+_5-4	1110008L16Rik	8.65407	13.3491	9.89993	0.648289	0.874155
106	GTCATTCTTCTCCTCCAGG	1110008P14Rik_CCDS38103.1_ex0_2:32379462-32379484:+_5-2	1110008P14Rik	25.6356	21.5818	16.7966	1.18783	1.52624
109	AGTTGATGGCAGCATACTC	1110008P14Rik_CCDS38103.1_ex0_2:32379515-32379537:+_5-5	1110008P14Rik	7.81739	7.06177	7.43685	1.107	1.05117
105	GTTCGACTCCAGCAGCTCC	1110008P14Rik_CCDS38103.1_ex0_2:32379423-32379445:+_5-1	1110008P14Rik	14.3559	15.0971	15.2859	0.950901	0.939161
108	GAGTTGATCTGATCCAACA	1110008P14Rik_CCDS38103.1_ex0_2:32379493-32379515:+_5-4	1110008P14Rik	13.4572	15.802	14.7276	0.851616	0.913745
107	AACTCTTGTCTGGACCACC	1110008P14Rik_CCDS38103.1_ex0_2:32379477-32379499:-_5-3	1110008P14Rik	17.0209	20.4823	21.657	0.831006	0.785928
110	GAAGTGCTCATGGAGAGGT	1110012L19Rik_CCDS30174.1_ex0_X:70388075-70388097:+_5-1	1110012L19Rik	6.54688	4.83442	5.17082	1.35422	1.26612
114	GAGACCTTAACTGCTGAGG	1110012L19Rik_CCDS30174.1_ex1_X:70388906-70388928:+_5-5	1110012L19Rik	1.21692	1.02819	1.06568	1.18355	1.14191
111	CAGATTCAGACCTTACTAC	1110012L19Rik_CCDS30174.1_ex0_X:70388111-70388133:+_5-2	1110012L19Rik	11.1641	15.6892	14.5305	0.711578	0.768322
113	CTCCAATGTCAATAAGTCC	1110012L19Rik_CCDS30174.1_ex1_X:70388868-70388890:-_5-4	1110012L19Rik	6.05107	8.8944	7.43685	0.680323	0.81366
112	CAGGAGAAAAGTACGGCAG	1110012L19Rik_CCDS30174.1_ex0_X:70388133-70388155:+_5-3	1110012L19Rik	2.23953	3.4811	3.20035	0.643339	0.699775
116	CCTATAAGAGTTCCATATC	1110017D15Rik_CCDS38717.1_ex4_4:41511476-41511498:-_5-2	1110017D15Rik	3.69597	2.66346	2.64205	1.38766	1.3989
119	GACCCACCACTATGGGCCT	1110017D15Rik_CCDS38717.1_ex5_4:41517051-41517073:-_5-5	1110017D15Rik	15.6884	11.6292	15.0888	1.34905	1.03974
118	CACCGCCACGTGGACCCTG	1110017D15Rik_CCDS38717.1_ex4_4:41511537-41511559:-_5-4	1110017D15Rik	27.6498	33.7336	33.02	0.819653	0.837364
115	TCAGTTCGAGGAATGCCGT	1110017D15Rik_CCDS38717.1_ex2_4:41507557-41507579:-_5-1	1110017D15Rik	19.376	23.7528	20.2449	0.815735	0.957081
117	ATGACCAAATGTGCCGCAC	1110017D15Rik_CCDS38717.1_ex4_4:41511504-41511526:-_5-3	1110017D15Rik	13.0234	17.5219	17.4862	0.743266	0.744781
120	ATATGATGCAAACTACAGC	1110032A03Rik_CCDS23173.1_ex1_9:50764246-50764268:-_5-1	1110032A03Rik	2.36348	1.56389	2.90478	1.51129	0.813651
121	ATATTACCTGGGAAGGCAA	1110032A03Rik_CCDS23173.1_ex2_9:50764688-50764710:+_5-2	1110032A03Rik	10.2345	8.49968	8.48776	1.2041	1.20579
124	CATCCGTACTGTAAAAACT	1110032A03Rik_CCDS23173.1_ex2_9:50764807-50764829:+_5-5	1110032A03Rik	2.92127	2.66346	3.29888	1.09679	0.885534
123	TCCTATTCGAACCGTACCC	1110032A03Rik_CCDS23173.1_ex2_9:50764764-50764786:-_5-4	1110032A03Rik	6.94973	7.45649	8.15935	0.932037	0.85175
122	TGGTTCCAGTTTCCTACCA	1110032A03Rik_CCDS23173.1_ex2_9:50764747-50764769:+_5-3	1110032A03Rik	11.3191	14.3641	11.8047	0.78801	0.958859
128	ACCTCGTCGCGCAGCAGAG	1110032F04Rik_CCDS50931.1_ex0_3:68870135-68870157:-_5-4	1110032F04Rik	10.6993	8.02038	10.0641	1.33401	1.06311
129	ACTCACTGTTGGATAGTGG	1110032F04Rik_CCDS50931.1_ex0_3:68870173-68870195:+_5-5	1110032F04Rik	13.1164	10.1631	13.611	1.29058	0.963661
127	CGGGTACCTGCGTGGGCTG	1110032F04Rik_CCDS50931.1_ex0_3:68870016-68870038:-_5-3	1110032F04Rik	15.2546	13.772	14.7933	1.10765	1.03118
126	ACGCCTTTCTGGACAACGT	1110032F04Rik_CCDS50931.1_ex0_3:68869912-68869934:+_5-2	1110032F04Rik	13.2403	12.5315	10.6881	1.05657	1.23879
125	TGCGACTCGGCCAACGCCA	1110032F04Rik_CCDS50931.1_ex0_3:68869863-68869885:+_5-1	1110032F04Rik	22.7847	23.8374	25.9921	0.955838	0.876601
134	AGACAATCTCTGAGCTCGA	1110034G24Rik_CCDS50727.1_ex1_2:132750416-132750438:+_5-5	1110034G24Rik	14.3869	6.10317	6.15605	2.35728	2.33703
132	GGCTTGATCCTTCTTCGAA	1110034G24Rik_CCDS50727.1_ex1_2:132750266-132750288:+_5-3	1110034G24Rik	20.4296	11.0654	10.0313	1.84626	2.03658
131	CTTCTTCGACTACTGATCC	1110034G24Rik_CCDS50727.1_ex0_2:132692110-132692132:+_5-2	1110034G24Rik	17.3308	11.3755	9.96561	1.52352	1.73906
130	TGGGATGCTTCATAACTGC	1110034G24Rik_CCDS50727.1_ex0_2:132692030-132692052:-_5-1	1110034G24Rik	22.1649	15.8584	12.4944	1.39768	1.77399
133	GCTTCATAGAATCTATCCA	1110034G24Rik_CCDS50727.1_ex1_2:132750330-132750352:-_5-4	1110034G24Rik	17.5787	16.9298	12.2316	1.03833	1.43715
135	GAAGTCCGAGTTATACCCC	1110037F02Rik_CCDS38693.1_ex1_4:11494814-11494836:+_5-1	1110037F02Rik	3.10719	2.74805	2.77342	1.13069	1.12035
138	GGTACGGGTCATCCCGCTC	1110037F02Rik_CCDS38693.1_ex7_4:11514134-11514156:-_5-3	1110037F02Rik	6.73281	8.07677	8.81618	0.833602	0.763688
137	CGGGTCATACGTCATAGGA	1110037F02Rik_CCDS38693.1_ex7_4:11513146-11513168:-_5-2	1110037F02Rik	5.89613	7.17455	6.12321	0.821812	0.962915
139	GGTGTACTGCAAGCCACGA	1110037F02Rik_CCDS38693.1_ex9_4:11518998-11519020:+_5-4	1110037F02Rik	4.53265	6.61066	5.72911	0.685657	0.791161
136	TCTAACATCTGGACACCGC	1110037F02Rik_CCDS38693.1_ex10_4:11521176-11521198:-_5-5	1110037F02Rik	14.7587	23.8938	19.3253	0.617682	0.7637
144	GGGAGGATATTAGCCAGTA	1110051M20Rik_CCDS16431.1_ex7_2:91421890-91421912:-_5-5	1110051M20Rik	3.10719	2.83263	3.20035	1.09693	0.970892
141	TTGTGCCCAGACTTCCCGC	1110051M20Rik_CCDS16431.1_ex5_2:91304771-91304793:-_5-2	1110051M20Rik	19.221	17.7192	19.6537	1.08476	0.977984
142	GTTCGGAAGCATCTCCAGA	1110051M20Rik_CCDS16431.1_ex6_2:91383745-91383767:+_5-3	1110051M20Rik	4.1298	4.10137	5.10513	1.00693	0.808951
140	GCTTACTCAGAAAGCCGCC	1110051M20Rik_CCDS16431.1_ex5_2:91304748-91304770:-_5-1	1110051M20Rik	8.37518	9.43009	8.9147	0.888133	0.93948
143	GTTTTAACAGCGTATGCCA	1110051M20Rik_CCDS16431.1_ex6_2:91383839-91383861:-_5-4	1110051M20Rik	8.34419	12.5597	9.6372	0.664365	0.865831
145	GACGTCTTGTTTCTCAAAG	1110057K04Rik_CCDS25798.1_ex0_12:8220700-8220722:-_5-1	1110057K04Rik	6.67083	4.04498	5.49923	1.64916	1.21305
146	CGTAGAATGCGGAATAGCC	1110057K04Rik_CCDS25798.1_ex1_12:8227225-8227247:-_5-2	1110057K04Rik	15.0066	11.7138	17.5191	1.2811	0.85659
147	TGTACAAGGCCTTTGCAAA	1110057K04Rik_CCDS25798.1_ex1_12:8227249-8227271:-_5-3	1110057K04Rik	7.35257	6.32872	6.55014	1.16178	1.12251
148	GATTATCCATACCGGGAAG	1110057K04Rik_CCDS25798.1_ex1_12:8227284-8227306:-_5-4	1110057K04Rik	6.45392	6.27233	5.82764	1.02895	1.10747
149	CATATAGGTGCCTACGGAA	1110057K04Rik_CCDS25798.1_ex2_12:8238558-8238580:-_5-5	1110057K04Rik	9.6457	12.616	10.097	0.764558	0.955305
151	ACCACTACTCACTCTGCAG	1110058L19Rik_CCDS14852.1_ex1_1:24003144-24003166:+_5-2	1110058L19Rik	10.9162	6.89261	9.80141	1.58376	1.11374
150	ACATCATCCGGAAACTCTG	1110058L19Rik_CCDS14852.1_ex0_1:23996344-23996366:+_5-1	1110058L19Rik	13.0854	9.68384	9.50584	1.35126	1.37656
154	GGGCTTGCTTCGCAGGCTC	1110058L19Rik_CCDS14852.1_ex1_1:24003231-24003253:+_5-5	1110058L19Rik	15.0066	12.6724	15.1873	1.1842	0.988102
152	CTCGGTCGTTTTGACTCAC	1110058L19Rik_CCDS14852.1_ex1_1:24003190-24003212:-_5-3	1110058L19Rik	15.3475	13.5465	16.4025	1.13295	0.935684
153	GGCAGCTTTGACTTCTTAA	1110058L19Rik_CCDS14852.1_ex1_1:24003212-24003234:+_5-4	1110058L19Rik	5.1834	5.08817	6.09037	1.01872	0.851082
157	ACTTCTTAGGCTTTGACAG	1110059E24Rik_CCDS29699.1_ex2_19:21619109-21619131:+_5-3	1110059E24Rik	6.08206	5.14456	4.71104	1.18223	1.29102
156	TGTTTACAAAAGACAGTAA	1110059E24Rik_CCDS29699.1_ex1_19:21598840-21598862:-_5-2	1110059E24Rik	1.06198	1.11278	1.26273	0.954348	0.841017
159	TTAATGCAAAACTTCATGA	1110059E24Rik_CCDS29699.1_ex2_19:21619190-21619212:-_5-5	1110059E24Rik	1.03099	1.08458	1	0.950585	1.03099
158	CTGCAAAGAAGTTCTTGAG	1110059E24Rik_CCDS29699.1_ex2_19:21619156-21619178:-_5-4	1110059E24Rik	4.71858	5.4547	5.66343	0.865049	0.833166
155	TTGAAGTTTGTGCCAAATG	1110059E24Rik_CCDS29699.1_ex1_19:21598779-21598801:-_5-1	1110059E24Rik	3.26214	4.66526	4.54684	0.69924	0.717452
160	GGAGACCTAACAGCTGAAG	1110059G10Rik_CCDS23650.1_ex1_9:122948964-122948986:-_5-1	1110059G10Rik	5.21439	3.81943	4.84241	1.36523	1.07682
161	GATGAACAGCCTCAAGTAG	1110059G10Rik_CCDS23650.1_ex1_9:122948997-122949019:-_5-3	1110059G10Rik	3.66498	2.91721	3.52876	1.25633	1.0386
163	AGAGAGTCGGCTACAAGGA	1110059G10Rik_CCDS23650.1_ex2_9:122950824-122950846:-_5-5	1110059G10Rik	18.6013	16.4223	16.9936	1.13269	1.0946
162	GGGCCCACCGTAGAGACCA	1110059G10Rik_CCDS23650.1_ex2_9:122950804-122950826:-_5-4	1110059G10Rik	13.3643	12.4187	13.4796	1.07614	0.991444
89654	AAGTAGTGGTTTTAAAAAA	1110059G10Rik_CCDS23650.1_ex1_9:122948984-122949006:-_5-2	1110059G10Rik	1	1	1	1	1
167	GAATTCTCTGGAAGCCCTA	1110059M19Rik_CCDS53063.1_ex1_X:45092146-45092168:+_5-4	1110059M19Rik	7.81739	6.18775	6.68151	1.26337	1.17
164	TAGCAGGTGTTAGTGTAAG	1110059M19Rik_CCDS53063.1_ex1_X:45092030-45092052:-_5-1	1110059M19Rik	4.71858	5.39831	4.1199	0.874085	1.14531
165	GGGACTCTTCCTCAATAGC	1110059M19Rik_CCDS53063.1_ex1_X:45092045-45092067:-_5-2	1110059M19Rik	9.83162	12.5879	10.7538	0.781041	0.914247
168	TCCGATCATCAGTGCCATA	1110059M19Rik_CCDS53063.1_ex1_X:45092161-45092183:-_5-5	1110059M19Rik	12.4966	18.7342	12.2645	0.667047	1.01893
166	GCAGAAATAAACAGCTCAG	1110059M19Rik_CCDS53063.1_ex1_X:45092074-45092096:+_5-3	1110059M19Rik	5.89613	9.57106	7.73242	0.616037	0.76252
169	TCCTTTGGAAGGCCACCTC	1110065P20Rik_CCDS51298.1_ex0_4:124849894-124849916:+_2-1	1110065P20Rik	6.32996	4.86262	5.66343	1.30176	1.11769
170	AGCCATCTGTATCGGCCAG	1110065P20Rik_CCDS51298.1_ex0_4:124849910-124849932:-_2-2	1110065P20Rik	2.89028	4.15776	3.98854	0.695152	0.724646
171	CGCCGCTACGCGGAGACCA	1190002N15Rik_CCDS40725.1_ex2_9:94537314-94537336:-_5-1	1190002N15Rik	15.9053	13.1235	12.7899	1.21197	1.24358
174	ACGTGTACTTCGCGCAGTA	1190002N15Rik_CCDS40725.1_ex2_9:94537586-94537608:-_5-4	1190002N15Rik	10.1415	8.80982	12.166	1.15116	0.833597
173	GCGCTTGAGCACCACGCGC	1190002N15Rik_CCDS40725.1_ex2_9:94537542-94537564:+_5-3	1190002N15Rik	14.108	12.4751	13.7095	1.13089	1.02907
175	AGCTCGTGCCGAAGCACGC	1190002N15Rik_CCDS40725.1_ex2_9:94537688-94537710:+_5-5	1190002N15Rik	8.43716	7.79482	8.42208	1.08241	1.00179
172	GCGTCTCAACGGCGACGTG	1190002N15Rik_CCDS40725.1_ex2_9:94537414-94537436:-_5-2	1190002N15Rik	17.2068	17.7756	17.6176	0.968001	0.976684
179	ACTGGAAGAAGATCGCCAG	1190003K10Rik_CCDS56887.1_ex1_13:64485875-64485897:-_5-4	1190003K10Rik	12.2797	8.83801	12.1331	1.38942	1.01208
178	TCTCAGAGCGCTTCTCCCC	1190003K10Rik_CCDS56887.1_ex1_13:64485859-64485881:+_5-3	1190003K10Rik	18.3534	15.6328	19.0954	1.17403	0.961139
180	CAGACTTGTTACCGAGAAC	1190003K10Rik_CCDS56887.1_ex1_13:64485892-64485914:-_5-5	1190003K10Rik	6.60886	6.89261	7.46969	0.958833	0.884756
177	CCATTCTTCTCTAAGCCTG	1190003K10Rik_CCDS56887.1_ex0_13:64481841-64481863:+_5-2	1190003K10Rik	12.5276	17.973	14.8261	0.697024	0.844969
176	GAAGAATGGAAGGAGAGGC	1190003K10Rik_CCDS56887.1_ex0_13:64481829-64481851:-_5-1	1190003K10Rik	2.27051	4.77803	4.34979	0.475198	0.521983
185	CCGCAGAGGCGACGCCATG	1190005I06Rik_CCDS52690.1_ex2_8:120628494-120628516:-_5-5	1190005I06Rik	35.5208	18.8188	23.726	1.88752	1.49712
183	AGCAACAACAACCACGACG	1190005I06Rik_CCDS52690.1_ex1_8:120611293-120611315:-_5-3	1190005I06Rik	5.05945	3.00179	3.72581	1.68547	1.35795
184	CCCTCCTGTCTGAAAGGTA	1190005I06Rik_CCDS52690.1_ex2_8:120628466-120628488:-_5-4	1190005I06Rik	16.8969	10.6424	13.8409	1.58769	1.2208
182	CAGGACGGGGGCCTCGTCG	1190005I06Rik_CCDS52690.1_ex1_8:120611281-120611303:+_5-2	1190005I06Rik	10.6063	10.3887	12.3959	1.02095	0.855635
181	CCATGCCCGTCGGGGTTGG	1190005I06Rik_CCDS52690.1_ex1_8:120611220-120611242:+_5-1	1190005I06Rik	19.6549	25.0497	21.5257	0.784634	0.91309
186	GCTCCGTTTTGAGTTCTCC	1190007I07Rik_CCDS48653.1_ex0_10:82620171-82620193:+_5-1	1190007I07Rik	9.21186	9.71204	8.25788	0.9485	1.11552
188	CTACAGCACTCACCAGGTC	1190007I07Rik_CCDS48653.1_ex1_10:82622694-82622716:+_5-3	1190007I07Rik	7.72443	9.79662	8.3564	0.788479	0.924373
189	TGGTACTATCGGCCTGACC	1190007I07Rik_CCDS48653.1_ex1_10:82622707-82622729:-_5-4	1190007I07Rik	8.62309	11.0372	9.86709	0.781277	0.873924
190	ATAGTACCAATGCACCACC	1190007I07Rik_CCDS48653.1_ex1_10:82622719-82622741:+_5-5	1190007I07Rik	7.07368	9.9094	7.43685	0.713836	0.951166
187	CTGAAATTCCACCAAAGCC	1190007I07Rik_CCDS48653.1_ex0_10:82620189-82620211:-_5-2	1190007I07Rik	6.26799	10.3323	9.473	0.606639	0.661669
195	TGTAATTAGGGGGCAGAGC	1200011I18Rik_CCDS27283.1_ex6_14:76107423-76107445:+_5-5	1200011I18Rik	8.49913	5.76483	2.93762	1.47431	2.8932
194	CCTCCTGGGTTTAAGAAGC	1200011I18Rik_CCDS27283.1_ex5_14:76106070-76106092:-_5-4	1200011I18Rik	6.4849	4.63706	5.53207	1.39849	1.17224
191	TTGGACCAATGCCTGCAAA	1200011I18Rik_CCDS27283.1_ex3_14:76099139-76099161:-_5-1	1200011I18Rik	8.56111	7.62566	8.15935	1.12267	1.04924
193	TTCTAATTTATCACCTGGG	1200011I18Rik_CCDS27283.1_ex5_14:76106039-76106061:+_5-3	1200011I18Rik	7.38356	6.63886	8.88186	1.11217	0.831308
192	GAGACTTAATGAAACCAGG	1200011I18Rik_CCDS27283.1_ex4_14:76102507-76102529:+_5-2	1200011I18Rik	4.62561	5.76483	5.13798	0.802384	0.90028
199	GCTCGAAAGTGGAAGCGCT	1200014J11Rik_CCDS24994.1_ex2_11:73053451-73053473:-_5-4	1200014J11Rik	13.1164	6.72344	9.6372	1.95084	1.36101
197	CCTTTAGGGAGCGCCGCAC	1200014J11Rik_CCDS24994.1_ex0_11:73048050-73048072:-_5-2	1200014J11Rik	8.87099	6.86441	8.98038	1.29232	0.987819
200	ACATCCCGCTGAATGCGAC	1200014J11Rik_CCDS24994.1_ex8_11:73070815-73070837:-_5-5	1200014J11Rik	14.6348	13.5747	13.0198	1.0781	1.12404
196	GGCGAGCTGGAAATCGTGC	1200014J11Rik_CCDS24994.1_ex0_11:73048031-73048053:+_5-1	1200014J11Rik	8.37518	8.02038	7.89663	1.04424	1.0606
198	GGGATCGATGTCACCTCCA	1200014J11Rik_CCDS24994.1_ex1_11:73049903-73049925:+_5-3	1200014J11Rik	5.43131	5.4265	5.36786	1.00089	1.01182
203	GGGTCCCACTCATACACCC	1300002K09Rik_CCDS18141.1_ex8_4:45870807-45870829:-_5-3	1300002K09Rik	13.5192	7.71024	10.9837	1.75341	1.23084
204	ACTCAATGACGATGAACTG	1300002K09Rik_CCDS18141.1_ex9_4:45873643-45873665:-_5-4	1300002K09Rik	6.17502	4.60887	6.91139	1.33981	0.893455
202	CCCACTGAGGAACCGTCAG	1300002K09Rik_CCDS18141.1_ex3_4:45864976-45864998:-_5-2	1300002K09Rik	2.51842	2.01499	3.33172	1.24984	0.755893
205	CGTCTCGTTCATATGGGTG	1300002K09Rik_CCDS18141.1_ex9_4:45873726-45873748:-_5-5	1300002K09Rik	21.0803	17.9448	21.5914	1.17473	0.976332
201	GGGGACTTTTAGTAACCGA	1300002K09Rik_CCDS18141.1_ex3_4:45864887-45864909:+_5-1	1300002K09Rik	4.78055	5.62386	5.20366	0.850048	0.918691
206	GAATATGAACAGTGCTACC	1300017J02Rik_CCDS23452.1_ex10_9:103272570-103272592:-_5-3	1300017J02Rik	8.49913	5.00359	5.92616	1.69861	1.43417
208	AGATGTCCCGGATGCACTC	1300017J02Rik_CCDS23452.1_ex15_9:103282496-103282518:+_5-5	1300017J02Rik	17.2688	13.4619	14.4977	1.28279	1.19114
210	TTTGGCTCCCCTCACGGGG	1300017J02Rik_CCDS23452.1_ex9_9:103269723-103269745:-_5-2	1300017J02Rik	24.0242	19.5518	22.8393	1.22874	1.05188
209	CCTCTTTTAAGATTCCGAA	1300017J02Rik_CCDS23452.1_ex9_9:103269610-103269632:+_5-1	1300017J02Rik	8.71605	7.14636	6.97708	1.21965	1.24924
207	CCAAAGTATGGTTCCCGGG	1300017J02Rik_CCDS23452.1_ex12_9:103277473-103277495:+_5-4	1300017J02Rik	10.2035	8.69704	10.3925	1.17321	0.981808
212	ACTATGGAGGAGTGTATGT	1500009L16Rik_CCDS48656.1_ex3_10:83758135-83758157:+_4-4	1500009L16Rik	4.62561	3.73485	5.17082	1.2385	0.894562
211	GATAACGGAAGACGACAAG	1500009L16Rik_CCDS48656.1_ex2_10:83757456-83757478:+_4-2	1500009L16Rik	1	1	1	1	1
89705	AGAACAGAAGACTCGATAA	1500009L16Rik_CCDS48656.1_ex2_10:83757442-83757464:+_4-1	1500009L16Rik	1	1	1	1	1
89707	TTTCTTAAAGAAACTATGG	1500009L16Rik_CCDS48656.1_ex3_10:83758123-83758145:+_4-3	1500009L16Rik	1	1	1	1	1
214	GCATTCTGCATAGCCTTGT	1500012F01Rik_CCDS38338.1_ex2_2:167065732-167065754:-_2-2	1500012F01Rik	41.2226	28.7996	27.7983	1.43136	1.48292
213	CCTTGTGGGGCTGGGCAGC	1500012F01Rik_CCDS38338.1_ex2_2:167065719-167065741:-_2-1	1500012F01Rik	15.7194	13.3491	13.808	1.17756	1.13842
216	GCGTGCCAAACGACAGCTG	1500015O10Rik_CCDS14925.1_ex2_1:43738629-43738651:+_5-2	1500015O10Rik	11.8459	10.4451	10.7866	1.13411	1.0982
219	TACCAGCAGTTCCTCTACA	1500015O10Rik_CCDS14925.1_ex2_1:43738681-43738703:+_5-5	1500015O10Rik	9.73866	8.80982	10.7538	1.10543	0.905602
215	CATTAGTCTTTGACGGGAC	1500015O10Rik_CCDS14925.1_ex2_1:43738562-43738584:-_5-1	1500015O10Rik	8.96396	9.68384	8.38924	0.925661	1.06851
217	ACAGCTGTGGGACCGTACG	1500015O10Rik_CCDS14925.1_ex2_1:43738641-43738663:+_5-3	1500015O10Rik	16.1532	18.1139	14.9575	0.891756	1.07994
218	CTGTACCTCAGGCCGCGTA	1500015O10Rik_CCDS14925.1_ex2_1:43738654-43738676:-_5-4	1500015O10Rik	23.2185	26.8542	25.6636	0.864615	0.904724
221	TGATCGTAGTCTGTGCTCA	1600002H07Rik_CCDS28479.1_ex6_17:24219858-24219880:+_5-2	1600002H07Rik	8.03431	6.55428	7.99515	1.22581	1.0049
222	GTGGCCCGCTGTATACCCT	1600002H07Rik_CCDS28479.1_ex6_17:24219898-24219920:+_5-3	1600002H07Rik	18.2604	16.4223	16.6324	1.11193	1.09788
223	GCTAACGTTTACCTGGACT	1600002H07Rik_CCDS28479.1_ex7_17:24220239-24220261:+_5-4	1600002H07Rik	10.2964	9.3737	7.83094	1.09844	1.31484
224	CAGCCTCCTGGAAACGCGC	1600002H07Rik_CCDS28479.1_ex8_17:24220527-24220549:+_5-5	1600002H07Rik	8.77803	7.99218	9.24311	1.09833	0.949683
220	GGGTATGGACCAGACCTCA	1600002H07Rik_CCDS28479.1_ex6_17:24219795-24219817:-_5-1	1600002H07Rik	9.21186	11.9676	10.1298	0.769735	0.909381
229	GCTAACGCACCTAAAAGCC	1600002K03Rik_CCDS24012.1_ex0_10:80173163-80173185:-_5-5	1600002K03Rik	2.64237	2.38152	3.36456	1.10953	0.785355
226	AACGGGAGGCTCCCGGACA	1600002K03Rik_CCDS24012.1_ex0_10:80173064-80173086:+_5-2	1600002K03Rik	9.14988	8.55607	9.89993	1.0694	0.924237
225	TTATAACCACACAAACGGG	1600002K03Rik_CCDS24012.1_ex0_10:80173051-80173073:+_5-1	1600002K03Rik	4.16079	4.72165	5.36786	0.881216	0.77513
227	GCTTGTTCTACGTAATCAC	1600002K03Rik_CCDS24012.1_ex0_10:80173107-80173129:+_5-3	1600002K03Rik	3.16917	3.93221	4.18558	0.805952	0.757163
228	TCGCTTTACTTCCTCATCC	1600002K03Rik_CCDS24012.1_ex0_10:80173145-80173167:+_5-4	1600002K03Rik	12.2487	15.5483	13.0527	0.787786	0.938405
234	TCCTATCCCGACCGGTCGC	1600012H06Rik_CCDS37444.1_ex0_17:14943924-14943946:-_5-5	1600012H06Rik	8.56111	5.48289	6.87855	1.56142	1.24461
232	AGTGCTGTCCGACACGTAC	1600012H06Rik_CCDS37444.1_ex0_17:14943825-14943847:-_5-3	1600012H06Rik	75.8054	66.8619	67.6674	1.13376	1.12027
233	AGTCGTCGAAGCTCGGGTG	1600012H06Rik_CCDS37444.1_ex0_17:14943847-14943869:-_5-4	1600012H06Rik	8.37518	9.28912	8.81618	0.901612	0.949979
231	TACTTGCGGTTGAACCATG	1600012H06Rik_CCDS37444.1_ex0_17:14943759-14943781:+_5-2	1600012H06Rik	6.02008	7.51288	7.14128	0.801301	0.842997
230	TCCTTCTGCACGTGGTCCA	1600012H06Rik_CCDS37444.1_ex0_17:14943712-14943734:+_5-1	1600012H06Rik	16.5561	22.7942	20.7703	0.726328	0.797101
239	GTTCGACCCATCTACAGAG	1600014C23Rik_CCDS57097.1_ex1_17:45733705-45733727:-_5-5	1600014C23Rik	15.6264	10.7834	13.9722	1.44911	1.11839
235	AGGCAGGGTTCCTTGCTGG	1600014C23Rik_CCDS57097.1_ex1_17:45733594-45733616:+_5-1	1600014C23Rik	18.1055	16.3941	15.8113	1.10439	1.14509
237	CCAGTGGGTAGACTGGGGA	1600014C23Rik_CCDS57097.1_ex1_17:45733649-45733671:+_5-3	1600014C23Rik	25.2327	24.2321	25.4338	1.04129	0.992096
236	CCTTTCCGGGACTCCCAGT	1600014C23Rik_CCDS57097.1_ex1_17:45733635-45733657:+_5-2	1600014C23Rik	16.3391	16.8734	13.9394	0.968338	1.17216
238	GGGGCACTGGCCGAAAGAC	1600014C23Rik_CCDS57097.1_ex1_17:45733670-45733692:+_5-4	1600014C23Rik	12.7445	15.661	12.6257	0.813772	1.00941
243	TTGATTGGCAATTCTCCCA	1600014K23Rik_CCDS53125.1_ex0_X:85269855-85269877:-_5-4	1600014K23Rik	10.7613	7.31552	9.76857	1.47102	1.10162
242	CCCTGGCGCTCGGTCAGCA	1600014K23Rik_CCDS53125.1_ex0_X:85269824-85269846:-_5-3	1600014K23Rik	20.0887	13.913	16.0741	1.44388	1.24976
241	CCACTTCTGAGACTGACGC	1600014K23Rik_CCDS53125.1_ex0_X:85269777-85269799:-_5-2	1600014K23Rik	16.711	15.069	19.1611	1.10897	0.872131
240	TTATTGCAGAACGAGGCCA	1600014K23Rik_CCDS53125.1_ex0_X:85269719-85269741:-_5-1	1600014K23Rik	7.60048	7.06177	7.60106	1.07628	0.999924
244	ATGGAGTGCGCGTTCCATC	1600014K23Rik_CCDS53125.1_ex0_X:85269909-85269931:+_5-5	1600014K23Rik	9.92459	12.1086	11.4106	0.819635	0.869768
247	GCCTGGGCACGATCCATCC	1600015I10Rik_CCDS39484.2_ex0_6:48930492-48930514:+_5-3	1600015I10Rik	23.8693	14.8998	18.7999	1.60199	1.26965
245	CTCAGGTCTGCGAATACCC	1600015I10Rik_CCDS39484.2_ex0_6:48930189-48930211:-_5-1	1600015I10Rik	10.9472	7.51288	10.0641	1.45712	1.08774
248	ATCTACCGTACGCTGACAG	1600015I10Rik_CCDS39484.2_ex0_6:48930550-48930572:+_5-4	1600015I10Rik	10.5134	8.66885	10.0313	1.21278	1.04806
249	GTTTCTAGCTATAACGTAG	1600015I10Rik_CCDS39484.2_ex0_6:48931003-48931025:+_5-5	1600015I10Rik	2.33249	2.15597	1.98523	1.08188	1.17492
246	CTCGCATGTAGATTGGTAA	1600015I10Rik_CCDS39484.2_ex0_6:48930458-48930480:-_5-2	1600015I10Rik	9.42878	11.6574	10.4254	0.808821	0.904405
253	GGTATACGTTTCGGAGGTC	1600016N20Rik_CCDS40181.1_ex6_7:141212021-141212043:+_5-2	1600016N20Rik	20.0887	13.631	15.7128	1.47375	1.27849
252	ACGACTGGCCACCCATCCC	1600016N20Rik_CCDS40181.1_ex6_7:141211850-141211872:-_5-1	1600016N20Rik	18.4773	18.9034	17.9132	0.977461	1.03149
254	TCCGAATAGAAATTCAAGT	1600016N20Rik_CCDS40181.1_ex7_7:141212401-141212423:+_5-3	1600016N20Rik	1.24791	1.5075	1.52546	0.827799	0.818053
250	AGCTTAGCGCTCTGAGAAT	1600016N20Rik_CCDS40181.1_ex12_7:141213912-141213934:+_5-4	1600016N20Rik	9.02593	11.883	9.6372	0.759567	0.936572
251	AAGGAGCCACTCTGTCGAC	1600016N20Rik_CCDS40181.1_ex12_7:141213934-141213956:+_5-5	1600016N20Rik	10.8232	14.8434	12.9213	0.729162	0.837628
258	TTGACATCCCAAAGCCAGT	1600029D21Rik_CCDS40619.1_ex1_9:50499219-50499241:+_5-4	1600029D21Rik	12.4346	9.79662	9.53868	1.26928	1.3036
255	AGTGATAATGGGTCCTGCG	1600029D21Rik_CCDS40619.1_ex0_9:50494643-50494665:+_5-1	1600029D21Rik	21.2043	16.9862	19.9165	1.24833	1.06466
259	TGTGCGATTGACGACGATG	1600029D21Rik_CCDS40619.1_ex2_9:50501076-50501098:-_5-5	1600029D21Rik	22.9086	18.8752	22.7408	1.21369	1.00738
256	ACTGACTGAATCGTTCACG	1600029D21Rik_CCDS40619.1_ex1_9:50499102-50499124:-_5-2	1600029D21Rik	8.25123	7.37191	8.3564	1.11928	0.987414
257	ATCCTGAAAGCAGTGAAGG	1600029D21Rik_CCDS40619.1_ex1_9:50499129-50499151:+_5-3	1600029D21Rik	2.39447	3.02999	2.74058	0.790256	0.873709
264	TGGTTGGATCGGCTGTAGG	1700001C02Rik_CCDS19158.1_ex1_5:30480594-30480616:-_5-5	1700001C02Rik	17.4237	18.1421	17.4862	0.960401	0.996426
263	GACTGATAACTCACAGAAC	1700001C02Rik_CCDS19158.1_ex1_5:30480552-30480574:+_5-4	1700001C02Rik	5.40032	5.79303	5.76196	0.93221	0.937237
262	GCTATGCGCTCCTCAGTGG	1700001C02Rik_CCDS19158.1_ex1_5:30480488-30480510:+_5-3	1700001C02Rik	1	1.08458	1	0.922013	1
261	CCATAAGAAGAGCCAAAGG	1700001C02Rik_CCDS19158.1_ex1_5:30480414-30480436:-_5-2	1700001C02Rik	4.81154	5.87761	4.21843	0.818622	1.1406
260	GGAAGCCACACCGGGAACA	1700001C02Rik_CCDS19158.1_ex1_5:30480394-30480416:-_5-1	1700001C02Rik	20.7085	26.4312	21.0002	0.783484	0.986107
269	CACCTGTCGCCGGGTGCGC	1700001C19Rik_CCDS28849.1_ex2_17:47436654-47436676:+_5-5	1700001C19Rik	43.3608	34.1001	39.9824	1.27157	1.0845
267	AAATGCGAGCTACCTGGAC	1700001C19Rik_CCDS28849.1_ex2_17:47436606-47436628:-_5-3	1700001C19Rik	10.6373	9.59926	9.93277	1.10814	1.07093
265	TCTGGGACAATGCCGTCAG	1700001C19Rik_CCDS28849.1_ex0_17:47413806-47413828:+_5-1	1700001C19Rik	19.407	20.1157	19.8836	0.964766	0.976028
268	CGCATTTCCAGGCGAGCGG	1700001C19Rik_CCDS28849.1_ex2_17:47436620-47436642:+_5-4	1700001C19Rik	13.3333	14.0822	13.4468	0.946822	0.991561
266	GAAAGCATTCTCTGCACAG	1700001C19Rik_CCDS28849.1_ex1_17:47433338-47433360:+_5-2	1700001C19Rik	6.39194	9.14815	5.89332	0.698714	1.08461
273	TATAACAGCCCAGAATACG	1700001J03Rik_CCDS51699.1_ex3_5:146184877-146184899:-_5-4	1700001J03Rik	3.47905	3.81943	4.15274	0.910883	0.837772
274	TAGTTGAATCGGGGGCGCC	1700001J03Rik_CCDS51699.1_ex3_5:146184896-146184918:+_5-5	1700001J03Rik	14.9137	18.2549	17.6176	0.816968	0.846523
272	CATTATGCTGAACAGCAGC	1700001J03Rik_CCDS51699.1_ex3_5:146184834-146184856:+_5-3	1700001J03Rik	9.83162	12.2495	13.7752	0.802613	0.71372
270	CACTCACGTTGTCATCAGC	1700001J03Rik_CCDS51699.1_ex3_5:146184745-146184767:+_5-1	1700001J03Rik	7.47652	11.7138	10.1298	0.638265	0.738071
271	CTAGCGTACGATGGGTACA	1700001J03Rik_CCDS51699.1_ex3_5:146184785-146184807:+_5-2	1700001J03Rik	5.36933	9.45829	7.96231	0.567685	0.674343
275	GGGTGAACTAAAGACCAAC	1700001K19Rik_CCDS49175.1_ex1_12:110668680-110668702:-_5-1	1700001K19Rik	1.58877	1.56389	1.09852	1.01591	1.44628
89773	GTGGAAGACTCGCTCCCAA	1700001K19Rik_CCDS49175.1_ex1_12:110668778-110668800:-_5-3	1700001K19Rik	1	1	1	1	1
277	GTTGCGGTTCCTATCACCC	1700001K19Rik_CCDS49175.1_ex1_12:110668844-110668866:+_5-4	1700001K19Rik	17.0519	17.6346	15.2859	0.966953	1.11553
278	GCGATAGTTGGAATGACCT	1700001K19Rik_CCDS49175.1_ex1_12:110668895-110668917:+_5-5	1700001K19Rik	7.19763	8.04857	9.67004	0.894274	0.744323
276	CATGGACTTCGAGGGCTGC	1700001K19Rik_CCDS49175.1_ex1_12:110668720-110668742:+_5-2	1700001K19Rik	17.0209	20.3977	18.8327	0.834452	0.903794
283	CTCATTAATATGGAGCCCC	1700001L19Rik_CCDS49306.1_ex1_13:68611253-68611275:-_5-5	1700001L19Rik	3.78893	1.73305	1.88671	2.18628	2.00822
282	CTTAAAAACACAGTCATAG	1700001L19Rik_CCDS49306.1_ex1_13:68611175-68611197:-_5-4	1700001L19Rik	2.51842	1.67666	2.1166	1.50204	1.18984
281	GCAGCTACTTCAGTCGCGA	1700001L19Rik_CCDS49306.1_ex0_13:68597701-68597723:+_5-3	1700001L19Rik	14.9757	12.0804	13.5453	1.23967	1.1056
279	GGTCGGGGTTTGCCACGCA	1700001L19Rik_CCDS49306.1_ex0_13:68597615-68597637:-_5-1	1700001L19Rik	11.7529	13.7438	13.2826	0.85514	0.884836
280	TTTCAGCTACATCCCACCA	1700001L19Rik_CCDS49306.1_ex0_13:68597660-68597682:+_5-2	1700001L19Rik	11.1021	15.9148	14.6947	0.697599	0.755519
287	CGAACGCTCGGCGAGACCG	1700001O22Rik_CCDS15885.1_ex6_2:30801337-30801359:-_5-4	1700001O22Rik	18.2604	15.069	16.3368	1.21179	1.11775
284	CGGCCTCACGGTCCGCCTC	1700001O22Rik_CCDS15885.1_ex6_2:30801130-30801152:+_5-1	1700001O22Rik	21.5451	19.0162	18.7013	1.13299	1.15206
288	GCGAGATGTAGACGGCGCG	1700001O22Rik_CCDS15885.1_ex6_2:30801408-30801430:-_5-5	1700001O22Rik	16.742	17.0707	16.501	0.980741	1.0146
286	GGCAGTAGCAGTGCGCGCG	1700001O22Rik_CCDS15885.1_ex6_2:30801312-30801334:+_5-3	1700001O22Rik	19.0661	20.7642	19.4567	0.91822	0.979925
285	CGCGACAACCCTGACTCCC	1700001O22Rik_CCDS15885.1_ex6_2:30801227-30801249:-_5-2	1700001O22Rik	13.9221	28.574	19.2268	0.487228	0.724097
290	GGGCGGAACCACGCGGCTC	1700001P01Rik_CCDS36297.1_ex2_11:97775672-97775694:+_5-2	1700001P01Rik	14.8517	14.3923	14.7933	1.03192	1.00395
293	GGAATTGCAGACCACAGCT	1700001P01Rik_CCDS36297.1_ex2_11:97775736-97775758:+_5-5	1700001P01Rik	4.71858	4.74984	4.02138	0.993418	1.17337
289	TGATCAGTTTTCCGCAAAA	1700001P01Rik_CCDS36297.1_ex2_11:97775652-97775674:+_5-1	1700001P01Rik	3.41708	3.62207	4.54684	0.943404	0.751528
292	CCGCCTTATAATCCTCAAC	1700001P01Rik_CCDS36297.1_ex2_11:97775717-97775739:-_5-4	1700001P01Rik	15.3165	17.691	16.3696	0.86578	0.935668
291	CCGGAAGTACCGACGACTG	1700001P01Rik_CCDS36297.1_ex2_11:97775690-97775712:+_5-3	1700001P01Rik	4.06783	4.86262	4.6782	0.836551	0.869528
294	CGCAGGTGGACATCGTGCC	1700003E16Rik_CCDS51818.1_ex1_6:83160981-83161003:+_5-1	1700003E16Rik	20.0267	14.3923	19.0626	1.39149	1.05058
297	CTTTACGATCTACGGCGGA	1700003E16Rik_CCDS51818.1_ex3_6:83161770-83161792:+_5-4	1700003E16Rik	12.1247	9.23273	11.5748	1.31324	1.04751
295	AATCCGTAGTGCATGCCAG	1700003E16Rik_CCDS51818.1_ex2_6:83161342-83161364:-_5-2	1700003E16Rik	25.6356	19.6646	23.1349	1.30364	1.10809
296	CCTCTACACAAACGGGCGC	1700003E16Rik_CCDS51818.1_ex2_6:83161399-83161421:-_5-3	1700003E16Rik	21.0183	18.0294	20.4419	1.16579	1.0282
298	GTCCCCTGCCGCGTCTGGC	1700003E16Rik_CCDS51818.1_ex3_6:83161916-83161938:-_5-5	1700003E16Rik	54.7644	47.295	54.7608	1.15793	1.00007
299	GTTCTTCAGCCATCTCAAG	1700003F12Rik_CCDS16933.1_ex0_2:154549033-154549055:+_5-1	1700003F12Rik	9.42878	7.48469	8.09367	1.25974	1.16496
302	GCCGCACCGGCCTCACAAA	1700003F12Rik_CCDS16933.1_ex2_2:154549603-154549625:-_5-4	1700003F12Rik	5.09044	4.66526	5.07229	1.09114	1.00358
303	GGTCCTCAGTTGGCCGCAC	1700003F12Rik_CCDS16933.1_ex2_2:154549615-154549637:-_5-5	1700003F12Rik	15.4095	14.6178	13.0198	1.05416	1.18354
301	ATCGTGCTGCTTTTCCCGC	1700003F12Rik_CCDS16933.1_ex2_2:154549545-154549567:+_5-3	1700003F12Rik	20.0267	19.8338	17.7818	1.00973	1.12625
300	GCGGGGGTTCTCACCCACA	1700003F12Rik_CCDS16933.1_ex1_2:154549359-154549381:-_5-2	1700003F12Rik	3.54103	4.24234	3.69297	0.834687	0.958857
304	GGCCGTGTAGCGAAACGCC	1700003M02Rik_CCDS18031.2_ex4_4:34719686-34719708:+_5-1	1700003M02Rik	13.0854	7.99218	8.48776	1.63727	1.54168
308	ATATGAACTATACAAGTCG	1700003M02Rik_CCDS18031.2_ex7_4:34724814-34724836:-_5-5	1700003M02Rik	1.58877	1.42291	1.49262	1.11656	1.06442
305	TCGCTTCGTGGAGAATGGC	1700003M02Rik_CCDS18031.2_ex4_4:34719757-34719779:+_5-2	1700003M02Rik	9.76965	9.00718	9.37447	1.08465	1.04215
307	TCACCGGGTCTTAGAATCC	1700003M02Rik_CCDS18031.2_ex6_4:34722756-34722778:-_5-4	1700003M02Rik	11.0712	17.7474	17.9132	0.623818	0.618046
306	CGAATTCCGGTAACAATCA	1700003M02Rik_CCDS18031.2_ex5_4:34721462-34721484:+_5-3	1700003M02Rik	1.46482	2.74805	2.44501	0.533041	0.599108
309	ATCCCGAGTTGCAGGAACG	1700006A11Rik_CCDS51064.1_ex6_3:124414334-124414356:+_5-1	1700006A11Rik	7.50751	5.65206	7.69958	1.32828	0.975055
310	GGCAGACATAGGATACATG	1700006A11Rik_CCDS51064.1_ex6_3:124414354-124414376:+_5-2	1700006A11Rik	6.4849	5.14456	6.38594	1.26054	1.0155
313	ATAACTCAAGTATTCCACA	1700006A11Rik_CCDS51064.1_ex9_3:124419875-124419897:-_5-5	1700006A11Rik	2.02261	1.70486	1.78819	1.18638	1.1311
311	ATGCCACGCCCTAAAAGAA	1700006A11Rik_CCDS51064.1_ex8_3:124419290-124419312:-_5-3	1700006A11Rik	11.2571	12.2777	11.8047	0.916871	0.953609
312	CCCTGCCAGTTACTAAGAG	1700006A11Rik_CCDS51064.1_ex9_3:124419820-124419842:-_5-4	1700006A11Rik	6.26799	7.76663	7.33833	0.807041	0.854144
315	GAGGTTTGGTATCGACGGC	1700006E09Rik_CCDS48938.1_ex1_11:101987952-101987974:-_5-2	1700006E09Rik	11.8768	8.83801	10.7538	1.34384	1.10443
318	GAATGAGTATCTTTCAAAA	1700006E09Rik_CCDS48938.1_ex2_11:101988543-101988565:+_5-5	1700006E09Rik	1.24791	1	1	1.24791	1.24791
316	GATTCTCTTTTGTTCACCC	1700006E09Rik_CCDS48938.1_ex2_11:101988442-101988464:-_5-3	1700006E09Rik	13.5192	10.8962	11.5091	1.24073	1.17465
314	ACAAAAATAGAGTACAAAT	1700006E09Rik_CCDS48938.1_ex0_11:101987216-101987238:+_5-1	1700006E09Rik	1.15494	1.14097	1.36125	1.01224	0.84844
317	TCATTCCAGCAGTCCACCT	1700006E09Rik_CCDS48938.1_ex2_11:101988528-101988550:-_5-4	1700006E09Rik	13.0544	15.4637	15.7128	0.844198	0.830813
323	GCAGATCCATGAGGCAAAT	1700007B14Rik_CCDS52603.1_ex5_8:75669432-75669454:-_5-5	1700007B14Rik	9.49075	7.23094	7.89663	1.31252	1.20187
321	CTTTTATATTCGACACATG	1700007B14Rik_CCDS52603.1_ex2_8:75577940-75577962:-_5-3	1700007B14Rik	8.84	7.11816	5.72911	1.24189	1.543
320	TCAATTAAAGCTGTGCACT	1700007B14Rik_CCDS52603.1_ex2_8:75577890-75577912:-_5-2	1700007B14Rik	11.2261	11.8266	11.9689	0.949223	0.937937
322	AAGAGGCCAGATTATGCAA	1700007B14Rik_CCDS52603.1_ex4_8:75629748-75629770:-_5-4	1700007B14Rik	8.0653	8.72524	8.12651	0.924365	0.992467
319	TAATGTAGTTCAAGAACAT	1700007B14Rik_CCDS52603.1_ex2_8:75577830-75577852:+_5-1	1700007B14Rik	2.08459	2.40971	2.51069	0.865076	0.830284
326	TGGTGGAGCTAGGCTACCG	1700007G11Rik_CCDS19456.1_ex1_5:98346253-98346275:+_5-3	1700007G11Rik	12.3417	6.66705	8.52061	1.85114	1.44845
324	ACGGTCGACCTGTACTACC	1700007G11Rik_CCDS19456.1_ex0_5:98329440-98329462:+_5-1	1700007G11Rik	5.09044	3.65026	4.94093	1.39454	1.03026
328	CTGAAAGCCCTGGCGATGA	1700007G11Rik_CCDS19456.1_ex2_5:98498328-98498350:+_5-5	1700007G11Rik	11.567	9.11996	9.67004	1.26831	1.19616
325	CGGACCCGCGCTTACCTCC	1700007G11Rik_CCDS19456.1_ex0_5:98329458-98329480:-_5-2	1700007G11Rik	6.82577	7.51288	7.40401	0.908543	0.921902
327	TAGGACACTGACAAGCGCG	1700007G11Rik_CCDS19456.1_ex2_5:98498285-98498307:+_5-4	1700007G11Rik	9.21186	10.5015	9.27595	0.877197	0.993091
331	ATTGTTCATTCTTACCCAG	1700007K09Rik_CCDS21912.1_ex1_7:131327176-131327198:+_5-3	1700007K09Rik	10.7613	7.23094	8.58629	1.48823	1.25331
333	CTTTACTCCAAAATATCCA	1700007K09Rik_CCDS21912.1_ex1_7:131327208-131327230:-_5-5	1700007K09Rik	2.27051	1.78944	1.78819	1.26884	1.26973
329	TCTCATGGGGGTCCTTGCA	1700007K09Rik_CCDS21912.1_ex0_7:131326265-131326287:+_5-1	1700007K09Rik	25.0778	21.9202	12.7243	1.14405	1.97086
330	TTCTTAAGAATCGCAAAGG	1700007K09Rik_CCDS21912.1_ex0_7:131326311-131326333:-_5-2	1700007K09Rik	11.8459	14.5615	17.5847	0.813508	0.673644
332	CAAGGCTCTGAAGTCCCCT	1700007K09Rik_CCDS21912.1_ex1_7:131327191-131327213:-_5-4	1700007K09Rik	8.62309	11.4883	11.3449	0.750599	0.760082
334	GGCATCTCATGCACCGTGG	1700007K13Rik_CCDS15837.1_ex1_2:28465137-28465159:+_5-1	1700007K13Rik	17.6716	13.9694	16.8951	1.26503	1.04596
338	CTAATGCGGTAGTAGTCGC	1700007K13Rik_CCDS15837.1_ex2_2:28466084-28466106:+_5-5	1700007K13Rik	11.0712	9.68384	11.739	1.14326	0.943106
337	TAGCGAGAAGCTCCCAGTC	1700007K13Rik_CCDS15837.1_ex2_2:28466066-28466088:-_5-4	1700007K13Rik	9.42878	9.03537	10.8852	1.04354	0.866205
336	AGTCAGGTTCAACAACCCG	1700007K13Rik_CCDS15837.1_ex2_2:28466051-28466073:-_5-3	1700007K13Rik	14.108	17.0426	17.7818	0.82781	0.793395
335	GGTTTCATGGCTACGGGTA	1700007K13Rik_CCDS15837.1_ex2_2:28466028-28466050:-_5-2	1700007K13Rik	12.7445	15.9994	16.4025	0.796564	0.776988
343	AAGTCACCACTGTGATGAC	1700008A04Rik_CCDS48767.1_ex3_11:32824431-32824453:-_5-5	1700008A04Rik	4.90451	4.12957	3.72581	1.18766	1.31636
339	AGAGCCATTAAGGACCCTC	1700008A04Rik_CCDS48767.1_ex0_11:32820638-32820660:-_5-1	1700008A04Rik	5.43131	4.72165	5.07229	1.1503	1.07078
340	TGAAAGTGGTTGCAGTCCT	1700008A04Rik_CCDS48767.1_ex1_11:32821870-32821892:+_5-2	1700008A04Rik	15.5025	15.069	17.6833	1.02877	0.876674
342	ACCTGATATCCCCATACCC	1700008A04Rik_CCDS48767.1_ex2_11:32822095-32822117:+_5-4	1700008A04Rik	7.04269	7.31552	10.7538	0.962705	0.654903
341	GAAGTGTCAGGACAGACCA	1700008A04Rik_CCDS48767.1_ex1_11:32821887-32821909:-_5-3	1700008A04Rik	14.3249	15.5201	14.235	0.922993	1.00632
346	CATCTCTGACTTTTGAGGT	1700008F21Rik_CCDS52713.1_ex11_8:129178236-129178258:-_7-7	1700008F21Rik	12.2487	7.14636	9.21027	1.71398	1.3299
347	TGAAGAAAAACCTGCTAGA	1700008F21Rik_CCDS52713.1_ex8_8:129145558-129145580:+_7-3	1700008F21Rik	3.01423	2.21235	2.44501	1.36245	1.23281
348	GCTAGAAGGTGAAATACAA	1700008F21Rik_CCDS52713.1_ex8_8:129145571-129145593:+_7-4	1700008F21Rik	1.24791	1.08458	1.19705	1.15059	1.04249
344	ATTTTATCAGGTGTCGACT	1700008F21Rik_CCDS52713.1_ex0_8:129072559-129072581:-_7-1	1700008F21Rik	9.33581	10.0504	9.50584	0.928903	0.982114
350	TAGAGCGAACTAAGAAACC	1700008F21Rik_CCDS52713.1_ex9_8:129163852-129163874:+_7-6	1700008F21Rik	1.68174	1.81763	1.91955	0.925235	0.876111
345	AATCTTTCATCATAGTCGA	1700008F21Rik_CCDS52713.1_ex0_8:129072645-129072667:-_7-2	1700008F21Rik	7.69344	8.97898	9.27595	0.856828	0.829397
349	GGCTGAGAGATCCCGAGGT	1700008F21Rik_CCDS52713.1_ex8_8:129145591-129145613:+_7-5	1700008F21Rik	9.70767	11.9676	11.3449	0.811164	0.855683
351	ACTTGATTGCACCACAAAA	1700008I05Rik_CCDS41129.1_ex3_X:135659193-135659215:-_5-1	1700008I05Rik	7.87937	4.4679	5.82764	1.76355	1.35207
352	TTTCATCAGGCCTAAAACT	1700008I05Rik_CCDS41129.1_ex4_X:135660549-135660571:+_5-2	1700008I05Rik	2.48743	1.81763	1.36125	1.3685	1.82731
355	GTACATTGTCTCCACGAAT	1700008I05Rik_CCDS41129.1_ex6_X:135665495-135665517:+_5-5	1700008I05Rik	3.54103	2.91721	3.69297	1.21384	0.958857
353	TCTAATTGGTGCGCACATG	1700008I05Rik_CCDS41129.1_ex5_X:135664435-135664457:+_5-3	1700008I05Rik	246.922	240.68	73.7758	1.02594	3.34692
354	TTCTTAGAAGATTCTGACG	1700008I05Rik_CCDS41129.1_ex5_X:135664560-135664582:+_5-4	1700008I05Rik	2.33249	2.43791	3.66013	0.956759	0.63727
360	GGGAGTACTCACGAGGACT	1700008O03Rik_CCDS52230.1_ex3_7:44362930-44362952:+_5-5	1700008O03Rik	9.8936	7.51288	10.6553	1.31689	0.928517
359	TTCCGAGATGACCTGCCGC	1700008O03Rik_CCDS52230.1_ex2_7:44362741-44362763:+_5-4	1700008O03Rik	17.3927	14.8998	17.2563	1.16731	1.0079
358	CACCGAAGTCTCCATGCAA	1700008O03Rik_CCDS52230.1_ex2_7:44362648-44362670:+_5-3	1700008O03Rik	4.99747	6.21594	5.13798	0.803976	0.972654
357	GACATTCATATTCTCGTAG	1700008O03Rik_CCDS52230.1_ex1_7:44361078-44361100:+_5-2	1700008O03Rik	4.37771	5.4547	5.46639	0.802558	0.800842
356	ATGTCATCTGCGGTACTGC	1700008O03Rik_CCDS52230.1_ex1_7:44361062-44361084:-_5-1	1700008O03Rik	27.8357	35.7918	33.7754	0.777714	0.824143
362	CTACGGAACTGGTTGATGG	1700008P02Rik_CCDS50858.1_ex2_3:6620049-6620071:+_5-2	1700008P02Rik	18.6013	14.0822	17.322	1.32091	1.07385
365	TGGTGACAAGCCTGAACGT	1700008P02Rik_CCDS50858.1_ex2_3:6620261-6620283:+_5-5	1700008P02Rik	32.7938	24.8524	29.309	1.31955	1.1189
361	GTGGCTAGTTTTCTGATCA	1700008P02Rik_CCDS50858.1_ex2_3:6620020-6620042:+_5-1	1700008P02Rik	7.2906	6.35692	8.38924	1.14688	0.869041
364	AAGGAAAGTTTAGTAAGGC	1700008P02Rik_CCDS50858.1_ex2_3:6620144-6620166:+_5-4	1700008P02Rik	2.3015	2.66346	2.01807	0.864102	1.14045
363	AATGGGCGGGAGGTTCGAA	1700008P02Rik_CCDS50858.1_ex2_3:6620109-6620131:+_5-3	1700008P02Rik	6.51589	9.8812	7.27264	0.659423	0.895945
366	TTCAAATTCACCAGTCAAG	1700009N14Rik_CCDS38709.1_ex0_4:39450882-39450904:-_5-1	1700009N14Rik	10.3584	8.58426	9.24311	1.20668	1.12066
368	GCTATTACATCCAAGCCCA	1700009N14Rik_CCDS38709.1_ex0_4:39451027-39451049:+_5-3	1700009N14Rik	14.5418	13.4619	12.9542	1.08022	1.12256
369	ACCAGATCCCTATGCCAGT	1700009N14Rik_CCDS38709.1_ex0_4:39451100-39451122:-_5-4	1700009N14Rik	33.1347	37.9909	33.02	0.872175	1.00347
370	TGAAATGTCGTAATACTGA	1700009N14Rik_CCDS38709.1_ex0_4:39451224-39451246:-_5-5	1700009N14Rik	3.54103	4.55248	3.9557	0.777824	0.895172
367	GCCCATCAAGTTTAACGTC	1700009N14Rik_CCDS38709.1_ex0_4:39450965-39450987:+_5-2	1700009N14Rik	8.22024	12.5315	10.9837	0.655968	0.748404
372	CCTTGGAACGGGGCACTGA	1700009P17Rik_CCDS35771.1_ex2_1:171125330-171125352:-_5-2	1700009P17Rik	12.4036	10.7834	10.8523	1.15025	1.14295
374	GTAGTTGTACGGGCGGTCA	1700009P17Rik_CCDS35771.1_ex3_1:171126101-171126123:-_5-4	1700009P17Rik	27.5259	24.3731	25.0725	1.12936	1.09785
375	TGCCGACAACCTCACCAAA	1700009P17Rik_CCDS35771.1_ex3_1:171126125-171126147:+_5-5	1700009P17Rik	6.60886	6.32872	6.94423	1.04426	0.951704
371	GATCATCGCCAACGATCGA	1700009P17Rik_CCDS35771.1_ex2_1:171125298-171125320:+_5-1	1700009P17Rik	10.4824	12.7006	11.8047	0.825343	0.887982
373	TGCCCATGAAGGAACCCCA	1700009P17Rik_CCDS35771.1_ex3_1:171126040-171126062:-_5-3	1700009P17Rik	3.94387	5.17275	4.54684	0.762432	0.867389
377	CAGGAGAAAGAGGAAACCA	1700010B08Rik_CCDS50816.1_ex2_2:173721794-173721816:+_5-2	1700010B08Rik	1.61976	1.25375	1.26273	1.29194	1.28275
380	TGTCTCCACAGGCTTCTCC	1700010B08Rik_CCDS50816.1_ex2_2:173721863-173721885:+_5-5	1700010B08Rik	17.2998	16.2531	16.698	1.0644	1.03604
376	CACAATATAGAAATACCGC	1700010B08Rik_CCDS50816.1_ex2_2:173721776-173721798:+_5-1	1700010B08Rik	11.8459	13.1517	11.0822	0.900706	1.06891
379	GAGTTTCGGATTGAGAGTC	1700010B08Rik_CCDS50816.1_ex2_2:173721836-173721858:-_5-4	1700010B08Rik	14.4179	18.3677	17.2563	0.784959	0.835512
378	GAGCAGCGTTCTCTTTCCA	1700010B08Rik_CCDS50816.1_ex2_2:173721811-173721833:-_5-3	1700010B08Rik	15.2855	20.9052	20.9345	0.731185	0.730159
387	GTCTTGGGTTCGGAAGTCC	1700010D01Rik_CCDS53138.1_ex1_X:95733102-95733124:+_5-4	1700010D01Rik	10.6683	9.74023	9.473	1.09528	1.12618
381	CTTCTTGCTACATTTGGAC	1700010D01Rik_CCDS53138.1_ex1_X:95732996-95733018:+_5-1	1700010D01Rik	19.9957	21.2153	20.9345	0.942515	0.955156
389	AGGTTGATGGCACAGCATC	1700010D01Rik_CCDS53138.1_ex1_X:95733121-95733143:+_5-5	1700010D01Rik	21.7931	24.9651	24.4814	0.872939	0.890189
383	GCTCAGCAGTCGAGGTTGA	1700010D01Rik_CCDS53138.1_ex1_X:95733049-95733071:+_5-2	1700010D01Rik	24.3961	29.3635	30.8854	0.830831	0.78989
386	TGGCTCAACATCAGGTGTG	1700010D01Rik_CCDS53138.1_ex1_X:95733068-95733090:+_5-3	1700010D01Rik	29.6331	38.3292	34.7278	0.773119	0.853295
393	CGTTATACCAGCTAGGTAG	1700010I14Rik_CCDS28385.2_ex1_17:8992608-8992630:-_5-4	1700010I14Rik	10.1415	8.18954	8.52061	1.23835	1.19023
391	CACGGGAGGCCTGTACGCG	1700010I14Rik_CCDS28385.2_ex1_17:8992390-8992412:-_5-2	1700010I14Rik	14.046	12.0522	14.0707	1.16544	0.998242
394	TATGACTTCACGGGGAGCA	1700010I14Rik_CCDS28385.2_ex1_17:8992698-8992720:+_5-5	1700010I14Rik	15.6884	13.6592	15.9755	1.14856	0.982026
390	GCACTGGCGCAATTCCAAC	1700010I14Rik_CCDS28385.2_ex1_17:8992211-8992233:+_5-1	1700010I14Rik	15.9983	16.0276	14.9575	0.998173	1.06958
392	CGGTACACATCCCTGCCTG	1700010I14Rik_CCDS28385.2_ex1_17:8992577-8992599:-_5-3	1700010I14Rik	24.7059	29.8428	24.2843	0.82787	1.01736
397	CGGCCTCAGGCAGCGCTAA	1700011A15Rik_CCDS37217.1_ex2_15:101452424-101452446:+_5-3	1700011A15Rik	5.02846	1.93041	3.00331	2.60486	1.67431
399	AGCTCATGATCGTCAAACT	1700011A15Rik_CCDS37217.1_ex2_15:101452520-101452542:+_5-5	1700011A15Rik	10.2964	7.71024	9.17743	1.33542	1.12193
395	GGCTTTTCTGTAGTTCACA	1700011A15Rik_CCDS37217.1_ex2_15:101452379-101452401:-_5-1	1700011A15Rik	10.3584	8.21774	8.22504	1.2605	1.25938
398	CGGCAGCTACGTGAGTACC	1700011A15Rik_CCDS37217.1_ex2_15:101452498-101452520:+_5-4	1700011A15Rik	13.0234	11.1499	14.3335	1.16802	0.908601
396	CCATGCCGGATGCGGCCTC	1700011A15Rik_CCDS37217.1_ex2_15:101452412-101452434:+_5-2	1700011A15Rik	46.2117	59.1366	50.9513	0.78144	0.906979
403	CTTGTGCTGAGAAACGATC	1700011E24Rik_CCDS50206.1_ex4_17:87422639-87422661:-_5-4	1700011E24Rik	6.54688	3.9604	3.98854	1.65309	1.64142
402	GCAGCTCCAAGAAGTCAGG	1700011E24Rik_CCDS50206.1_ex4_17:87422590-87422612:+_5-3	1700011E24Rik	11.6599	8.64065	10.294	1.34943	1.13269
400	TACGAGGTACTTCCAGCAC	1700011E24Rik_CCDS50206.1_ex3_17:87411547-87411569:-_5-1	1700011E24Rik	13.4572	11.6856	11.4106	1.15161	1.17936
401	CTTTGCCCGGGACAGTACG	1700011E24Rik_CCDS50206.1_ex3_17:87411562-87411584:-_5-2	1700011E24Rik	21.7931	20.1157	21.1973	1.08338	1.02811
404	CACAGGATACTCCGATACC	1700011E24Rik_CCDS50206.1_ex4_17:87422755-87422777:-_5-5	1700011E24Rik	12.2487	13.4337	13.9394	0.91179	0.878712
405	AGAGGTAATTGCTTGTGGC	1700011H14Rik_CCDS26996.1_ex3_14:49235927-49235949:+_5-1	1700011H14Rik	14.2629	9.79662	11.542	1.4559	1.23574
409	AGCTCATTCACGAGACTGC	1700011H14Rik_CCDS26996.1_ex5_14:49245110-49245132:-_5-5	1700011H14Rik	11.0712	8.4151	9.44016	1.31563	1.17277
408	ACCAGAATCGAACTCGAGA	1700011H14Rik_CCDS26996.1_ex5_14:49245088-49245110:-_5-4	1700011H14Rik	10.9472	8.86621	10.8195	1.23471	1.0118
407	TTGGTTTTGCCATACCTGC	1700011H14Rik_CCDS26996.1_ex5_14:49245025-49245047:+_5-3	1700011H14Rik	20.4915	18.3113	19.3253	1.11907	1.06035
406	CCAATCTTTCCAGTATCCA	1700011H14Rik_CCDS26996.1_ex4_14:49243803-49243825:-_5-2	1700011H14Rik	7.44554	9.8812	7.96231	0.753505	0.935098
410	TAACTTCCAAGCATCGACC	1700011I03Rik_CCDS50295.1_ex1_18:57538029-57538051:-_5-1	1700011I03Rik	5.61724	3.76304	5.13798	1.49274	1.09328
412	ATGTGAACCGAAAGAACGT	1700011I03Rik_CCDS50295.1_ex3_18:57592037-57592059:+_5-3	1700011I03Rik	6.57787	5.22914	6.55014	1.25792	1.00423
413	TTGCAACTTCTCAATGCAC	1700011I03Rik_CCDS50295.1_ex4_18:57594075-57594097:-_5-4	1700011I03Rik	7.69344	7.25913	7.6339	1.05983	1.0078
414	ATGTTAAGTTTCTCCTGGG	1700011I03Rik_CCDS50295.1_ex4_18:57594110-57594132:-_5-5	1700011I03Rik	9.70767	9.74023	10.0641	0.996657	0.964581
411	CACTTGGAGATTTGCCTGA	1700011I03Rik_CCDS50295.1_ex2_18:57563985-57564007:+_5-2	1700011I03Rik	26.7512	27.7846	24.7441	0.962806	1.08111
415	TAACTTACAGGGGGACATA	1700011L22Rik_CCDS52605.1_ex2_8:79214884-79214906:+_5-1	1700011L22Rik	5.33834	3.59387	4.05422	1.4854	1.31674
417	ACACTCTACCCGGCCACGC	1700011L22Rik_CCDS52605.1_ex4_8:79229343-79229365:-_5-3	1700011L22Rik	23.0016	19.1571	21.9854	1.20068	1.04622
416	GATATAGCAAGCCCCTCCA	1700011L22Rik_CCDS52605.1_ex3_8:79220273-79220295:-_5-2	1700011L22Rik	5.43131	5.17275	7.33833	1.04998	0.740129
418	ACGCAAGGCCCAACAACTG	1700011L22Rik_CCDS52605.1_ex5_8:79248351-79248373:-_5-4	1700011L22Rik	4.34672	4.4397	4.34979	0.979057	0.999295
419	TTCGAACTGATCAGACGCA	1700011L22Rik_CCDS52605.1_ex5_8:79248365-79248387:-_5-5	1700011L22Rik	8.40617	11.7138	10.0313	0.717628	0.837994
421	TCTCCTCTAGTTCAAGATC	1700012A03Rik_CCDS19984.1_ex1_6:32058472-32058494:+_5-2	1700012A03Rik	8.0653	6.01858	7.69958	1.34007	1.0475
423	CTGCGCCCTCTTCTGCAGC	1700012A03Rik_CCDS19984.1_ex1_6:32058549-32058571:-_5-4	1700012A03Rik	22.4438	18.8188	23.2662	1.19263	0.964651
424	CTGCAGCCACTTCTGCAGC	1700012A03Rik_CCDS19984.1_ex1_6:32058578-32058600:-_5-5	1700012A03Rik	9.86261	8.52788	9.89993	1.15651	0.99623
422	TGGAGTCACTCTAGAGGAG	1700012A03Rik_CCDS19984.1_ex1_6:32058491-32058513:+_5-3	1700012A03Rik	8.56111	7.59746	6.22173	1.12684	1.376
420	GAAACAGGAAGTACCTCAG	1700012A03Rik_CCDS19984.1_ex0_6:32051723-32051745:-_5-1	1700012A03Rik	2.89028	3.93221	3.29888	0.735027	0.87614
425	TGTCCATAAGGTGCCGGAA	1700012B07Rik_CCDS48972.1_ex1_11:109794227-109794249:+_5-1	1700012B07Rik	26.9061	16.3941	18.7013	1.64121	1.43873
426	GGTCCTTTGCAGGCACGTA	1700012B07Rik_CCDS48972.1_ex1_11:109794270-109794292:-_5-2	1700012B07Rik	126.316	118.345	120.804	1.06736	1.04563
429	CACCACTCATCCCACGGTC	1700012B07Rik_CCDS48972.1_ex3_11:109813670-109813692:-_5-5	1700012B07Rik	15.6264	17.0989	16.2711	0.913882	0.960378
428	ACAGCAAAGTCGTTGGACA	1700012B07Rik_CCDS48972.1_ex2_11:109797381-109797403:-_5-4	1700012B07Rik	6.05107	7.06177	8.42208	0.856877	0.718477
427	AAGATGAGTCCTCACAGAA	1700012B07Rik_CCDS48972.1_ex2_11:109797277-109797299:-_5-3	1700012B07Rik	6.73281	9.43009	10.2283	0.713971	0.65825
430	AATGCTCCAGATTCCATCC	1700012B09Rik_CCDS40536.1_ex1_9:14761704-14761726:+_5-1	1700012B09Rik	4.78055	3.9604	4.6782	1.20709	1.02188
434	GCACCCGTGCTGAGCCTGG	1700012B09Rik_CCDS40536.1_ex3_9:14770862-14770884:-_5-5	1700012B09Rik	16.9279	15.5483	14.1364	1.08873	1.19747
432	GAACCGCATAAGAGAATCA	1700012B09Rik_CCDS40536.1_ex2_9:14766920-14766942:-_5-3	1700012B09Rik	1.18593	1.14097	1.26273	1.0394	0.93918
433	TTGTTGGCGAGACTCTTGG	1700012B09Rik_CCDS40536.1_ex3_9:14770839-14770861:+_5-4	1700012B09Rik	17.9195	18.3395	18.0445	0.977101	0.993074
431	ATGTGAAAAGCCCACCTAC	1700012B09Rik_CCDS40536.1_ex2_9:14766856-14766878:-_5-2	1700012B09Rik	14.3869	16.3941	15.0231	0.877566	0.957648
435	GTTACGCGCTTCCTGCCAG	1700012L04Rik_CCDS40856.1_ex0_X:9284061-9284083:-_1-1	1700012L04Rik	14.9447	10.7552	13.7752	1.38953	1.0849
438	GTGCTTGTACGGGAGACCC	1700012P22Rik_CCDS51365.1_ex1_4:144419832-144419854:+_5-3	1700012P22Rik	13.2093	9.8812	13.2169	1.33681	0.999429
436	CTATGATGACCACTACAAC	1700012P22Rik_CCDS51365.1_ex1_4:144419764-144419786:-_5-1	1700012P22Rik	7.13565	7.51288	7.43685	0.949789	0.9595
440	TCCTTCCTGTAAATGCACT	1700012P22Rik_CCDS51365.1_ex2_4:144423845-144423867:+_5-5	1700012P22Rik	8.09629	8.52788	10.4911	0.949391	0.771731
437	TGATCAGATAGCGATGCGA	1700012P22Rik_CCDS51365.1_ex1_4:144419789-144419811:+_5-2	1700012P22Rik	10.7303	12.0522	10.6224	0.89032	1.01015
439	TATTCGAAAAGTAAAATGG	1700012P22Rik_CCDS51365.1_ex2_4:144423778-144423800:-_5-4	1700012P22Rik	3.57202	5.68025	4.31695	0.628848	0.82744
443	CAGCACACCAAGAAATGTA	1700013D24Rik_CCDS51906.1_ex2_6:124356872-124356894:-_5-3	1700013D24Rik	4.81154	3.50929	4.21843	1.37109	1.1406
444	GGTCTATCTCGAGCAAAAA	1700013D24Rik_CCDS51906.1_ex2_6:124356892-124356914:+_5-4	1700013D24Rik	3.47905	2.55069	3.5616	1.36397	0.976822
441	TGAAGATGAACCATCTGGG	1700013D24Rik_CCDS51906.1_ex1_6:124356409-124356431:-_5-1	1700013D24Rik	12.8375	10.1631	13.184	1.26314	0.973713
445	AGGCGAGAACATGACAAAA	1700013D24Rik_CCDS51906.1_ex2_6:124356911-124356933:+_5-5	1700013D24Rik	2.61138	2.63527	2.74058	0.990937	0.952859
442	AACATTGCGCAGAGAACAT	1700013D24Rik_CCDS51906.1_ex1_6:124356458-124356480:+_5-2	1700013D24Rik	5.52427	11.9958	7.60106	0.460518	0.726777
446	GCTGTTGCGCAAGGTGAGC	1700013F07Rik_CCDS51046.1_ex1_3:108542506-108542528:-_5-1	1700013F07Rik	23.6833	14.2513	17.1906	1.66183	1.37769
447	ATTCCTCTCTAGATACCAA	1700013F07Rik_CCDS51046.1_ex2_3:108543426-108543448:+_5-2	1700013F07Rik	3.01423	2.57888	3.06899	1.16881	0.982158
450	TACCCCTGGATATCCTCAA	1700013F07Rik_CCDS51046.1_ex2_3:108543536-108543558:-_5-5	1700013F07Rik	6.51589	6.77983	7.50253	0.96107	0.868492
448	GTTATACAAGGTTGCTAAG	1700013F07Rik_CCDS51046.1_ex2_3:108543462-108543484:-_5-3	1700013F07Rik	4.1298	4.41151	4.38263	0.936143	0.942312
449	ACTGAGATATTGTTACACC	1700013F07Rik_CCDS51046.1_ex2_3:108543510-108543532:+_5-4	1700013F07Rik	8.71605	10.3323	9.21027	0.843572	0.946341
453	GAGTGGCCAGATTGGCCGC	1700013G24Rik_CCDS18818.1_ex0_4:137454699-137454721:-_5-3	1700013G24Rik	12.0628	8.21774	10.0313	1.46789	1.20251
455	GGGGCGTTCCGTTTGGTCC	1700013G24Rik_CCDS18818.1_ex0_4:137455057-137455079:-_5-5	1700013G24Rik	21.5761	21.751	20.4091	0.991961	1.05718
452	TGCGAAGCCGCCTTCCAAG	1700013G24Rik_CCDS18818.1_ex0_4:137454659-137454681:+_5-2	1700013G24Rik	14.4179	15.6892	15.5158	0.918966	0.929241
451	CCAATATGAACAACGGCAA	1700013G24Rik_CCDS18818.1_ex0_4:137454635-137454657:+_5-1	1700013G24Rik	8.77803	11.9676	9.11175	0.733484	0.963375
454	TGACTCGTCTCTACACACT	1700013G24Rik_CCDS18818.1_ex0_4:137454795-137454817:-_5-4	1700013G24Rik	7.5385	10.6988	9.83425	0.704609	0.766556
457	TCAACATCTGATTCATGTC	1700013H16Rik_CCDS53071.1_ex6_X:53751057-53751079:-_5-2	1700013H16Rik	8.03431	8.78162	9.53868	0.9149	0.842288
458	GCATCCCAGGGTTTTGCAG	1700013H16Rik_CCDS53071.1_ex7_X:53751517-53751539:-_5-3	1700013H16Rik	9.33581	10.2477	9.14459	0.911013	1.02091
459	TTTGAAAGCACCCCAACAG	1700013H16Rik_CCDS53071.1_ex7_X:53751579-53751601:-_5-4	1700013H16Rik	7.22862	8.16135	5.959	0.885714	1.21306
456	TAGAACTGTTTACAGATCC	1700013H16Rik_CCDS53071.1_ex6_X:53751023-53751045:-_5-1	1700013H16Rik	2.73534	3.19915	2.97046	0.855019	0.920845
460	GCACCACAAGGGACCCTGG	1700013H16Rik_CCDS53071.1_ex7_X:53751752-53751774:-_5-5	1700013H16Rik	4.1298	6.10317	6.02468	0.676666	0.685481
461	GAGCGTTTACCTGGCAAGC	1700015E13Rik_CCDS15471.1_ex0_1:170308973-170308995:-_5-1	1700015E13Rik	6.26799	4.9472	5.59775	1.26698	1.11973
465	GTAGCCATTCTGCTGGGCT	1700015E13Rik_CCDS15471.1_ex1_1:170311841-170311863:-_5-5	1700015E13Rik	18.4773	17.0144	17.8803	1.08598	1.03339
464	TTCAGCCACGTCCTCAAGA	1700015E13Rik_CCDS15471.1_ex1_1:170311700-170311722:-_5-4	1700015E13Rik	48.195	44.7293	45.3026	1.07748	1.06385
463	CATACGAAGTAGCTGTAAG	1700015E13Rik_CCDS15471.1_ex1_1:170311603-170311625:-_5-3	1700015E13Rik	2.45644	2.55069	2.51069	0.963052	0.978394
462	TTGGGGGACACCCAGAATG	1700015E13Rik_CCDS15471.1_ex1_1:170311538-170311560:+_5-2	1700015E13Rik	2.33249	2.4661	2.93762	0.94582	0.794006
466	ATTTGGTGCCGAGAAGAAA	1700015F17Rik_CCDS51410.1_ex3_5:5457354-5457376:-_5-1	1700015F17Rik	3.47905	1.84583	2.57637	1.88482	1.35037
470	GATTTTCCGCTTCCAGTGA	1700015F17Rik_CCDS51410.1_ex5_5:5478887-5478909:+_5-5	1700015F17Rik	12.9924	8.44329	12.4287	1.53879	1.04536
467	TCTTATCTCGAGTACACAC	1700015F17Rik_CCDS51410.1_ex4_5:5466626-5466648:+_5-2	1700015F17Rik	8.5921	6.4133	7.89663	1.33973	1.08807
468	CTTGTAGAATGTGCTCAAA	1700015F17Rik_CCDS51410.1_ex4_5:5466657-5466679:-_5-3	1700015F17Rik	5.83415	5.39831	7.00992	1.08074	0.832271
469	GAAGCAAAATACGTTGAAA	1700015F17Rik_CCDS51410.1_ex5_5:5478866-5478888:-_5-4	1700015F17Rik	1.46482	2.26874	1.49262	0.645654	0.981379
474	TCAGATGTTTCTACCAGGC	1700015G11Rik_CCDS57552.1_ex2_7:52014855-52014877:-_4-4	1700015G11Rik	8.62309	7.08997	6.5173	1.21624	1.32311
472	TCAATTTTCCTTAAGTCTG	1700015G11Rik_CCDS57552.1_ex1_7:52013580-52013602:-_4-2	1700015G11Rik	14.9137	13.1799	14.7933	1.13154	1.00814
473	GAAATAAAATTTACCTGCC	1700015G11Rik_CCDS57552.1_ex2_7:52014841-52014863:+_4-3	1700015G11Rik	3.72696	4.18595	3.89001	0.890348	0.958083
471	AAACCTACAGAAAGAGAAG	1700015G11Rik_CCDS57552.1_ex1_7:52013536-52013558:-_4-1	1700015G11Rik	1	1.16917	1	0.855311	1
475	ACATCAAAGGCTATTACCC	1700016C15Rik_CCDS48462.1_ex1_1:177741020-177741042:+_5-1	1700016C15Rik	3.72696	2.40971	2.60921	1.54664	1.42838
476	CCTCCCACTGTAATCAAAA	1700016C15Rik_CCDS48462.1_ex1_1:177741058-177741080:-_5-2	1700016C15Rik	4.56364	2.9736	3.29888	1.53472	1.38339
479	GGTCTAATTGAGGCTGATA	1700016C15Rik_CCDS48462.1_ex2_1:177743294-177743316:-_5-5	1700016C15Rik	6.32996	4.83442	6.38594	1.30935	0.991235
478	ACGGAGTTGTGCTCTTGAG	1700016C15Rik_CCDS48462.1_ex2_1:177743276-177743298:-_5-4	1700016C15Rik	10.4204	9.09176	9.67004	1.14614	1.0776
477	GGAATTGTCAAGTCTATAA	1700016C15Rik_CCDS48462.1_ex2_1:177743256-177743278:-_5-3	1700016C15Rik	1.49581	1.36653	1.49262	1.09461	1.00214
480	GGGTTATATTTACCGTCAA	1700016D06Rik_CCDS40221.1_ex2_8:11661658-11661680:+_5-1	1700016D06Rik	4.28474	3.31193	4.90809	1.29373	0.872997
483	ATAGCTACAGTGTTTGGTA	1700016D06Rik_CCDS40221.1_ex4_8:11665030-11665052:-_5-4	1700016D06Rik	19.345	15.8302	17.5519	1.22203	1.10216
481	CCCTGGCTCCAGAATATCC	1700016D06Rik_CCDS40221.1_ex3_8:11662656-11662678:+_5-2	1700016D06Rik	11.1951	10.3605	10.5896	1.08056	1.05718
484	TGGCCAAATTTAGAAACTC	1700016D06Rik_CCDS40221.1_ex4_8:11665060-11665082:-_5-5	1700016D06Rik	6.4849	6.01858	6.64866	1.07748	0.975369
482	CCAAGATGAAATTCTAGTC	1700016D06Rik_CCDS40221.1_ex3_8:11662675-11662697:-_5-3	1700016D06Rik	6.08206	7.25913	9.53868	0.837849	0.637621
487	ATACGATTTCTCCCAAGAA	1700016H13Rik_CCDS51575.1_ex1_5:103649487-103649509:+_5-3	1700016H13Rik	6.14403	4.74984	5.59775	1.29352	1.09759
486	TTAACTCACATTGCATTGA	1700016H13Rik_CCDS51575.1_ex1_5:103649412-103649434:+_5-2	1700016H13Rik	9.67668	7.68205	9.96561	1.25965	0.971007
485	TACTCCTTTTCAAGTGCCA	1700016H13Rik_CCDS51575.1_ex0_5:103648932-103648954:+_5-1	1700016H13Rik	4.87352	3.90401	5.56491	1.24834	0.875759
488	TTCGTCAAGTTTGTGTACC	1700016H13Rik_CCDS51575.1_ex1_5:103649519-103649541:+_5-4	1700016H13Rik	13.2093	12.0804	13.8409	1.09346	0.954372
489	TGCGGAACTCACAAAGACC	1700016H13Rik_CCDS51575.1_ex1_5:103649537-103649559:-_5-5	1700016H13Rik	2.64237	3.36832	3.59444	0.784478	0.735127
494	AGACTCTCGTTGATCTGGC	1700016K19Rik_CCDS25059.1_ex1_11:76003190-76003212:-_5-5	1700016K19Rik	17.3308	11.0654	15.0888	1.56622	1.14858
491	AAGGATCGGGCAAGGGCGA	1700016K19Rik_CCDS25059.1_ex0_11:76000245-76000267:+_5-2	1700016K19Rik	23.8383	16.6196	22.7079	1.43434	1.04978
490	AGGCGGTGCCCACGATGGG	1700016K19Rik_CCDS25059.1_ex0_11:76000173-76000195:-_5-1	1700016K19Rik	8.74704	6.9208	9.73573	1.26388	0.898448
492	CAGATAAACATCACAGTCG	1700016K19Rik_CCDS25059.1_ex1_11:76003003-76003025:+_5-3	1700016K19Rik	7.91036	7.96399	7.96231	0.993266	0.993476
493	GATTAATGCTGTACGAATA	1700016K19Rik_CCDS25059.1_ex1_11:76003135-76003157:-_5-4	1700016K19Rik	4.6566	7.06177	5.36786	0.65941	0.867497
496	CCAGGACGCTCGTTTGGCC	1700017B05Rik_CCDS23219.1_ex1_9:57257719-57257741:+_5-2	1700017B05Rik	25.9145	20.1157	23.6603	1.28827	1.09527
498	ACAAAGGGTTGCGGTAGAC	1700017B05Rik_CCDS23219.1_ex1_9:57258680-57258702:+_5-4	1700017B05Rik	12.2797	10.868	10.8523	1.12989	1.13153
497	TCTTGCGAGGACTACCATC	1700017B05Rik_CCDS23219.1_ex1_9:57258506-57258528:-_5-3	1700017B05Rik	9.24285	9.26093	8.88186	0.998048	1.04064
495	CGTTGTCAATCACGGGCAT	1700017B05Rik_CCDS23219.1_ex1_9:57257582-57257604:+_5-1	1700017B05Rik	13.8291	16.676	13.9394	0.82928	0.992088
499	GCCTTCGAAGTACCCCCTA	1700017B05Rik_CCDS23219.1_ex1_9:57258916-57258938:+_5-5	1700017B05Rik	7.50751	11.4883	8.02799	0.653493	0.935167
502	GGATCCAGCAGTATAACTC	1700017D01Rik_CCDS50393.1_ex3_19:11110328-11110350:-_5-3	1700017D01Rik	7.60048	5.53928	6.71435	1.37211	1.13198
504	GGCCTAATTCACAATGCAC	1700017D01Rik_CCDS50393.1_ex4_19:11112420-11112442:-_5-5	1700017D01Rik	8.00332	7.85121	9.01322	1.01937	0.887954
503	ATCCTGAGTTGATGAACTG	1700017D01Rik_CCDS50393.1_ex3_19:11110345-11110367:+_5-4	1700017D01Rik	25.1398	28.0101	27.1087	0.897524	0.927371
501	AACATCATAAGTATCTTCG	1700017D01Rik_CCDS50393.1_ex2_19:11105754-11105776:-_5-2	1700017D01Rik	4.71858	5.31373	6.05753	0.887998	0.778961
500	TTCCTATTGATTCAAAAAT	1700017D01Rik_CCDS50393.1_ex2_19:11105696-11105718:+_5-1	1700017D01Rik	1	1.25375	1.59114	0.797608	0.62848
509	CAAAATGCTCAAATGTCAA	1700017N19Rik_CCDS36047.1_ex6_10:100609233-100609255:+_5-5	1700017N19Rik	5.33834	3.17096	2.77342	1.68351	1.92482
507	AAAAGCGTAGCTCCGACAG	1700017N19Rik_CCDS36047.1_ex4_10:100603544-100603566:+_5-3	1700017N19Rik	4.22277	2.66346	3.29888	1.58544	1.28006
506	AAAACTAATGGATGATGAA	1700017N19Rik_CCDS36047.1_ex2_10:100601954-100601976:-_5-2	1700017N19Rik	2.33249	1.76125	1.88671	1.32434	1.23627
505	GGTCTTGATACGTTCTCCA	1700017N19Rik_CCDS36047.1_ex2_10:100601933-100601955:-_5-1	1700017N19Rik	12.8065	11.6011	11.2793	1.10391	1.1354
508	TTAGCCTATTTGAAAGGGC	1700017N19Rik_CCDS36047.1_ex5_10:100605641-100605663:+_5-4	1700017N19Rik	5.64822	6.15956	6.41878	0.916986	0.879953
511	CCTTCCGATGCCCAGGGAC	1700018B08Rik_CCDS52692.1_ex3_8:121535471-121535493:-_5-2	1700018B08Rik	22.5058	19.5236	20.7703	1.15274	1.08355
513	GGGACAAAGGCACCCAGTA	1700018B08Rik_CCDS52692.1_ex4_8:121539883-121539905:+_5-4	1700018B08Rik	13.1783	13.0672	12.2316	1.00851	1.0774
512	CGGCAGGACTTCATGGCTC	1700018B08Rik_CCDS52692.1_ex3_8:121535519-121535541:+_5-3	1700018B08Rik	6.05107	7.51288	6.45162	0.805426	0.937915
510	CAGGGCTGTCATGCCCTAC	1700018B08Rik_CCDS52692.1_ex3_8:121535453-121535475:-_5-1	1700018B08Rik	11.8459	16.5632	15.056	0.715189	0.786787
514	GTGCATCAGCCCGGGGCAC	1700018B08Rik_CCDS52692.1_ex4_8:121539910-121539932:+_5-5	1700018B08Rik	10.2345	15.1535	15.056	0.675385	0.679761
518	CCTACTGTAGGTTGGTGTC	1700018C11Rik_CCDS18262.1_ex2_4:63611857-63611879:+_5-4	1700018C11Rik	17.7956	13.913	16.6324	1.27906	1.06994
516	TGCTTTTCTTGGCCAACGA	1700018C11Rik_CCDS18262.1_ex1_4:63608482-63608504:+_5-2	1700018C11Rik	29.9429	29.3071	30.3928	1.0217	0.9852
517	CTACCGCACAGTCCGTCGT	1700018C11Rik_CCDS18262.1_ex1_4:63608495-63608517:-_5-3	1700018C11Rik	31.0895	31.619	29.7359	0.983254	1.04552
519	CTCTCTTGGCTTGGAACCT	1700018C11Rik_CCDS18262.1_ex2_4:63611879-63611901:+_5-5	1700018C11Rik	16.8349	17.8602	16.8622	0.942596	0.998382
515	CTGCCAGCAGTGATTATGA	1700018C11Rik_CCDS18262.1_ex1_4:63608456-63608478:-_5-1	1700018C11Rik	20.8944	22.7378	22.084	0.918928	0.946134
520	GTAGGTTATACGGAAAGTC	1700018F24Rik_CCDS51696.1_ex1_5:145043378-145043400:-_5-1	1700018F24Rik	4.6566	3.79123	3.49592	1.22825	1.33201
529	GGCAGTTGATGGACTACGC	1700018F24Rik_CCDS51696.1_ex3_5:145044798-145044820:+_5-5	1700018F24Rik	28.9823	26.2621	26.9444	1.10358	1.07563
525	GCTGATGGATAGTTGGTCG	1700018F24Rik_CCDS51696.1_ex1_5:145043470-145043492:-_5-3	1700018F24Rik	26.6582	33.1979	34.4322	0.803009	0.774222
527	GTACCTATGGTAGACAGCC	1700018F24Rik_CCDS51696.1_ex1_5:145043497-145043519:-_5-4	1700018F24Rik	23.8383	33.6772	30.5241	0.707846	0.780965
522	CGTGGTAATGAACTGCAGC	1700018F24Rik_CCDS51696.1_ex1_5:145043453-145043475:-_5-2	1700018F24Rik	23.4664	33.1979	30.1957	0.706865	0.777144
534	GAAGCCTATTTAGAAGAAC	1700019A02Rik_CCDS48258.1_ex6_1:53182518-53182540:-_5-5	1700019A02Rik	2.23953	1.53569	2.2808	1.45832	0.981903
530	GCATCAATGACAGATGAAG	1700019A02Rik_CCDS48258.1_ex4_1:53177769-53177791:-_5-1	1700019A02Rik	5.33834	4.63706	4.08706	1.15123	1.30616
531	ATTGATGCAATACTCCTGA	1700019A02Rik_CCDS48258.1_ex4_1:53177782-53177804:+_5-2	1700019A02Rik	12.6206	12.1649	14.1693	1.03745	0.890699
533	CTGAAGCTCTGAATGAAGA	1700019A02Rik_CCDS48258.1_ex5_1:53181864-53181886:-_5-4	1700019A02Rik	8.00332	8.83801	7.89663	0.905557	1.01351
532	ATCTCATAAAGTATCCCTC	1700019A02Rik_CCDS48258.1_ex4_1:53177797-53177819:-_5-3	1700019A02Rik	4.06783	4.91901	3.5616	0.826961	1.14213
537	CCATTGCACGTACTGACTA	1700019B03Rik_CCDS52467.1_ex0_8:3476203-3476225:+_5-3	1700019B03Rik	7.91036	6.30053	7.53537	1.25551	1.04976
538	CCGGGATTCAATGCCCTCG	1700019B03Rik_CCDS52467.1_ex0_8:3476285-3476307:+_5-4	1700019B03Rik	17.0829	13.8848	17.3549	1.23033	0.984327
536	TGCACGCGGATATGCGTCC	1700019B03Rik_CCDS52467.1_ex0_8:3476170-3476192:+_5-2	1700019B03Rik	21.7621	18.3959	21.8212	1.18299	0.997288
535	CATCTTGCGACTGTAACGT	1700019B03Rik_CCDS52467.1_ex0_8:3476092-3476114:-_5-1	1700019B03Rik	7.41455	6.89261	9.89993	1.07572	0.748949
539	GGATAGTGTGCCTGGTACG	1700019B03Rik_CCDS52467.1_ex0_8:3476336-3476358:-_5-5	1700019B03Rik	13.1164	18.2267	14.9575	0.719623	0.876912
542	CGATCACAGCACCGGGCTC	1700019D03Rik_CCDS14949.1_ex0_1:52925386-52925408:+_5-3	1700019D03Rik	24.644	18.7624	19.4567	1.31348	1.26661
541	TCTGCGAATTCAAGGATCA	1700019D03Rik_CCDS14949.1_ex0_1:52925361-52925383:+_5-2	1700019D03Rik	8.25123	7.54108	6.71435	1.09417	1.2289
544	AATATAGGACACCTTCTCC	1700019D03Rik_CCDS14949.1_ex0_1:52925443-52925465:-_5-5	1700019D03Rik	1.46482	1.45111	1.95239	1.00945	0.750271
543	TGGGAGTTTCTTTACTTCC	1700019D03Rik_CCDS14949.1_ex0_1:52925405-52925427:+_5-4	1700019D03Rik	6.57787	8.66885	7.60106	0.758794	0.865389
540	GCATCCTCCACAATTTCAC	1700019D03Rik_CCDS14949.1_ex0_1:52925331-52925353:+_5-1	1700019D03Rik	3.01423	6.83622	6.64866	0.440921	0.453359
547	AAAGCTGCATACTGTGGCC	1700019G17Rik_CCDS39540.1_ex0_6:85901335-85901357:+_5-3	1700019G17Rik	20.3366	14.5615	18.1102	1.39661	1.12294
90037	AGGCACCCCAGGTAAAAGC	1700019G17Rik_CCDS39540.1_ex0_6:85901389-85901411:+_5-5	1700019G17Rik	1	1	1	1	1
545	CTTTCTTGGAGAAATTACG	1700019G17Rik_CCDS39540.1_ex0_6:85901281-85901303:-_5-1	1700019G17Rik	6.02008	6.13136	5.89332	0.981851	1.02151
546	AAGCCAGATAAGGAGCCGC	1700019G17Rik_CCDS39540.1_ex0_6:85901299-85901321:+_5-2	1700019G17Rik	11.0712	13.3491	11.7062	0.829356	0.945752
548	ACACTAGGACTATGGTCAC	1700019G17Rik_CCDS39540.1_ex0_6:85901370-85901392:+_5-4	1700019G17Rik	6.11305	7.37191	7.17412	0.829235	0.852097
551	TGGAATTCATGGCGCACCT	1700019L03Rik_CCDS15932.1_ex7_2:32781394-32781416:+_5-3	1700019L03Rik	15.2855	11.5447	12.5929	1.32403	1.21382
553	TCCCATTTCCGCTGATACC	1700019L03Rik_CCDS15932.1_ex7_2:32781607-32781629:+_5-5	1700019L03Rik	15.7504	12.7006	13.3154	1.24012	1.18287
549	TTCTCTAGGATGGCCCGCC	1700019L03Rik_CCDS15932.1_ex5_2:32779871-32779893:+_5-1	1700019L03Rik	22.4438	18.1421	20.3106	1.23711	1.10503
550	GAGAACATCGCCCTCGGTG	1700019L03Rik_CCDS15932.1_ex7_2:32781348-32781370:-_5-2	1700019L03Rik	17.6716	21.2999	19.4567	0.829658	0.908255
552	GACGCGTTCGAGGCCCAAC	1700019L03Rik_CCDS15932.1_ex7_2:32781417-32781439:-_5-4	1700019L03Rik	17.2068	22.766	16.2054	0.755812	1.06179
557	AGAACGCAGAGATACAAGG	1700019N19Rik_CCDS38031.1_ex3_19:58789199-58789221:-_5-4	1700019N19Rik	1.68174	1.4793	2.31364	1.13685	0.726879
554	GCCACAAGGTATACCATCA	1700019N19Rik_CCDS38031.1_ex2_19:58787608-58787630:-_5-1	1700019N19Rik	6.98071	7.03358	7.66674	0.992484	0.910519
558	TCCTGGAACGCTTTCACAC	1700019N19Rik_CCDS38031.1_ex3_19:58789221-58789243:+_5-5	1700019N19Rik	15.2546	16.1121	14.1364	0.946774	1.0791
555	AGGGCCATACCCAGAGTCA	1700019N19Rik_CCDS38031.1_ex3_19:58789068-58789090:+_5-2	1700019N19Rik	4.22277	4.77803	5.92616	0.883788	0.712564
556	AGAGCAGTTTAATCCCTGC	1700019N19Rik_CCDS38031.1_ex3_19:58789175-58789197:+_5-3	1700019N19Rik	11.443	12.9544	11.9361	0.883331	0.958691
560	TGGTGGGACGTCATCGGGC	1700019O17Rik_CCDS56635.1_ex0_1:86426502-86426524:-_5-2	1700019O17Rik	19.345	13.2363	17.0921	1.46151	1.13181
563	GTCACTCGGGGAAACCGTC	1700019O17Rik_CCDS56635.1_ex0_1:86427159-86427181:-_5-5	1700019O17Rik	7.56949	6.52608	8.55345	1.15988	0.884964
562	CAACCGTACAAGTCGGAGC	1700019O17Rik_CCDS56635.1_ex0_1:86427140-86427162:+_5-4	1700019O17Rik	15.3475	13.9694	15.8442	1.09865	0.968654
561	GTGATGGCTTTCGCCTCAG	1700019O17Rik_CCDS56635.1_ex0_1:86426567-86426589:-_5-3	1700019O17Rik	14.9757	14.4769	12.9542	1.03445	1.15605
559	ATTTACCCGGAGAGTCCGA	1700019O17Rik_CCDS56635.1_ex0_1:86426470-86426492:+_5-1	1700019O17Rik	16.742	19.1853	17.4862	0.872646	0.957439
566	CGACACAGACTTCTCCCAA	1700020A23Rik_CCDS50710.1_ex1_2:130405802-130405824:+_5-3	1700020A23Rik	5.33834	3.00179	4.94093	1.77838	1.08043
565	TGGCACTTACCCATAGAGC	1700020A23Rik_CCDS50710.1_ex0_2:130405692-130405714:-_5-2	1700020A23Rik	11.6289	9.99398	10.8523	1.16359	1.07156
568	GGCCATCTTTGTTGGAGAG	1700020A23Rik_CCDS50710.1_ex1_2:130405871-130405893:-_5-5	1700020A23Rik	12.4966	10.868	12.0018	1.14985	1.04123
564	ATTCGAACCATCTTCTCAA	1700020A23Rik_CCDS50710.1_ex0_2:130405620-130405642:+_5-1	1700020A23Rik	4.1298	4.63706	5.959	0.890608	0.693036
567	CTCCCAATGGGTCAGAGCC	1700020A23Rik_CCDS50710.1_ex1_2:130405814-130405836:+_5-4	1700020A23Rik	17.6097	22.3995	19.0954	0.786164	0.922192
569	TTCGTCGTCGGTGGAAGAG	1700020L24Rik_CCDS25165.1_ex1_11:83440374-83440396:+_5-1	1700020L24Rik	20.4296	18.4805	17.9132	1.10547	1.14048
570	TCGCGCTCTTCCGCGTCTC	1700020L24Rik_CCDS25165.1_ex1_11:83440434-83440456:-_5-2	1700020L24Rik	21.0493	19.1007	19.194	1.10202	1.09666
571	TGCTGGACTCCTGGCGCAG	1700020L24Rik_CCDS25165.1_ex1_11:83440478-83440500:-_5-3	1700020L24Rik	37.8139	35.4816	38.2746	1.06573	0.987964
572	GCCCGTTCGCTCTGCTGGG	1700020L24Rik_CCDS25165.1_ex1_11:83440553-83440575:+_5-4	1700020L24Rik	22.7847	21.6382	21.657	1.05298	1.05207
573	AACACGCACGGTTCCTCCG	1700020L24Rik_CCDS25165.1_ex2_11:83440687-83440709:-_5-5	1700020L24Rik	8.5921	10.4733	11.2793	0.820383	0.761761
89983	AAATTCAAATATAAAGTCA	1700020N15Rik_CCDS57758.1_ex0_X:69945429-69945451:+_5-1	1700020N15Rik	1	1	1	1	1
580	CTCATTTACGCGATGGTAA	1700020N15Rik_CCDS57758.1_ex1_X:69945727-69945749:-_5-5	1700020N15Rik	23.2185	24.0347	23.1677	0.96604	1.00219
578	CTTTCTTCACCTTAACCAA	1700020N15Rik_CCDS57758.1_ex1_X:69945683-69945705:-_5-4	1700020N15Rik	17.3927	20.3131	18.8327	0.856233	0.923539
574	TGAATATGTTCATAAACAC	1700020N15Rik_CCDS57758.1_ex1_X:69945617-69945639:-_5-2	1700020N15Rik	5.98909	7.87941	6.22173	0.760094	0.962609
576	GGGAGTCTGAGCTCTTGGG	1700020N15Rik_CCDS57758.1_ex1_X:69945664-69945686:-_5-3	1700020N15Rik	2.17755	2.94541	2.24796	0.739304	0.968678
582	AGTGAGCCTGGTGTGGCGA	1700021F05Rik_CCDS23820.1_ex2_10:43532755-43532777:-_5-3	1700021F05Rik	13.0544	11.6856	13.611	1.11713	0.959108
90069	TGAAGACGGGCCTTGACGT	1700021F05Rik_CCDS23820.1_ex2_10:43532682-43532704:-_5-2	1700021F05Rik	1	1	1	1	1
581	TAGAAGATGCATTCTACAA	1700021F05Rik_CCDS23820.1_ex1_10:43530644-43530666:-_5-1	1700021F05Rik	1.03099	1.16917	1.36125	0.881815	0.757382
584	TTTTGAGTCGTATAGAAAA	1700021F05Rik_CCDS23820.1_ex2_10:43532892-43532914:+_5-5	1700021F05Rik	1.21692	1.42291	1.7225	0.855229	0.706482
583	TCGCTCCTCTCGGGGTAAC	1700021F05Rik_CCDS23820.1_ex2_10:43532795-43532817:+_5-4	1700021F05Rik	13.0234	16.958	14.7604	0.767981	0.88232
587	TTAACAACGTCCATGAAAG	1700021F07Rik_CCDS50814.1_ex1_2:173526064-173526086:+_5-3	1700021F07Rik	3.26214	2.32513	2.70774	1.40299	1.20475
589	GACGGACATAGAAGTGGCT	1700021F07Rik_CCDS50814.1_ex2_2:173527896-173527918:-_5-5	1700021F07Rik	25.5736	20.0875	20.9017	1.27311	1.22352
586	GCAAAACTGGCCGGCCAAG	1700021F07Rik_CCDS50814.1_ex1_2:173526036-173526058:+_5-2	1700021F07Rik	36.6984	38.2447	38.8001	0.959568	0.945832
588	CAGCTGCTTGAGGGTGAAG	1700021F07Rik_CCDS50814.1_ex2_2:173527841-173527863:+_5-4	1700021F07Rik	11.505	13.2363	13.611	0.869198	0.845273
585	GAGGGCCGAAAGTGAAGCC	1700021F07Rik_CCDS50814.1_ex1_2:173526015-173526037:+_5-1	1700021F07Rik	10.0176	12.616	11.1807	0.794033	0.895966
591	TCTTTGTCCCGCTGGCGAC	1700021K19Rik_CCDS28124.1_ex12_16:32843051-32843073:+_5-2	1700021K19Rik	15.8743	11.5165	14.2021	1.3784	1.11774
594	GGTAATTTGAAGACGACTG	1700021K19Rik_CCDS28124.1_ex17_16:32857002-32857024:-_5-5	1700021K19Rik	3.47905	2.86082	2.97046	1.2161	1.17121
592	GGCCCGAGTACCTGGCCAT	1700021K19Rik_CCDS28124.1_ex12_16:32843276-32843298:-_5-3	1700021K19Rik	28.3625	28.433	28.5865	0.99752	0.992166
593	ACTCTGACTAGCCCCCTAG	1700021K19Rik_CCDS28124.1_ex12_16:32843346-32843368:-_5-4	1700021K19Rik	12.5896	13.7438	12.987	0.916017	0.969398
590	GTCCGAGTGGGAGCGAATA	1700021K19Rik_CCDS28124.1_ex12_16:32843025-32843047:+_5-1	1700021K19Rik	12.3107	14.5333	12.2645	0.847069	1.00377
595	GGTTTGGCAGATCCGAAGA	1700022I11Rik_CCDS51160.1_ex0_4:42970121-42970143:+_5-1	1700022I11Rik	4.96648	2.52249	3.10183	1.96888	1.60115
596	AGGTTGTACGCAGGTGGAA	1700022I11Rik_CCDS51160.1_ex1_4:42971318-42971340:-_5-2	1700022I11Rik	23.1255	21.2435	21.0002	1.08859	1.10121
599	TCACAGTACCCGTGACTGA	1700022I11Rik_CCDS51160.1_ex1_4:42971965-42971987:+_5-5	1700022I11Rik	37.566	42.7557	41.6572	0.878619	0.901788
597	GATTGGACTAGTTGAGAAC	1700022I11Rik_CCDS51160.1_ex1_4:42971420-42971442:-_5-3	1700022I11Rik	2.45644	2.88902	3.06899	0.850269	0.800408
598	AGGATACCAGTGGTATAGG	1700022I11Rik_CCDS51160.1_ex1_4:42971452-42971474:-_5-4	1700022I11Rik	6.26799	10.3323	8.98038	0.606639	0.697964
602	CCTGCTGAGAGTTCAGAAG	1700022P22Rik_CCDS48483.1_ex0_1:191039704-191039726:+_5-3	1700022P22Rik	11.1641	7.51288	8.09367	1.486	1.37936
600	CGCGAGTCCTACTGCCTGG	1700022P22Rik_CCDS48483.1_ex0_1:191039663-191039685:+_5-1	1700022P22Rik	25.5426	20.0593	24.7441	1.27335	1.03227
603	CAGAAGAGGCACTTCAGCA	1700022P22Rik_CCDS48483.1_ex0_1:191039717-191039739:+_5-4	1700022P22Rik	10.5134	8.49968	10.4582	1.23691	1.00527
601	TTCGTTGCTTCTTTCCACC	1700022P22Rik_CCDS48483.1_ex0_1:191039678-191039700:-_5-2	1700022P22Rik	8.71605	7.37191	7.96231	1.18233	1.09466
604	ATGCATGCAAGCTAAGGTC	1700022P22Rik_CCDS48483.1_ex0_1:191039744-191039766:-_5-5	1700022P22Rik	7.78641	9.17634	9.73573	0.84853	0.799777
605	GATTCCCTCCGGTCTCGCA	1700023E05Rik_CCDS19369.1_ex0_5:77016430-77016452:+_5-1	1700023E05Rik	23.1565	17.5782	21.7556	1.31734	1.0644
609	GCAATGGGGAACTCCGGAC	1700023E05Rik_CCDS19369.1_ex2_5:77044060-77044082:+_5-5	1700023E05Rik	6.98071	6.38511	6.09037	1.09328	1.14619
607	CTGGCTATCAAAGATGGGG	1700023E05Rik_CCDS19369.1_ex0_5:77016582-77016604:-_5-3	1700023E05Rik	15.8123	14.4769	17.0264	1.09225	0.928693
606	GGCGCTCGGATGACTGAAG	1700023E05Rik_CCDS19369.1_ex0_5:77016515-77016537:-_5-2	1700023E05Rik	9.49075	9.8812	11.4763	0.960486	0.826987
608	TACCTACCACGGCTCCAGC	1700023E05Rik_CCDS19369.1_ex0_5:77016604-77016626:+_5-4	1700023E05Rik	19.438	20.8488	19.9821	0.93233	0.972766
612	CAGACGGTGGTTGTCAGTA	1700023F06Rik_CCDS56813.1_ex4_11:103200280-103200302:+_5-3	1700023F06Rik	16.4941	13.0954	18.1102	1.25954	0.910762
611	CCCTACTCAGGCCAAATGA	1700023F06Rik_CCDS56813.1_ex3_11:103200172-103200194:-_5-2	1700023F06Rik	7.84838	6.80802	8.42208	1.15281	0.931881
613	ATGTGCGAGGCTCTTCGGC	1700023F06Rik_CCDS56813.1_ex5_11:103200803-103200825:-_5-4	1700023F06Rik	17.3308	15.2663	16.501	1.13523	1.05029
610	ATCGGGTCGGTGAGCCCCC	1700023F06Rik_CCDS56813.1_ex3_11:103200147-103200169:-_5-1	1700023F06Rik	7.38356	7.14636	7.30549	1.03319	1.01069
614	TGGATACCCGCGTTGCGCA	1700023F06Rik_CCDS56813.1_ex5_11:103200840-103200862:+_5-5	1700023F06Rik	19.8408	20.3977	22.8065	0.972699	0.869963
617	CAGCTGTGTTGGCCAAAGA	1700024G13Rik_CCDS36867.1_ex1_14:32377953-32377975:-_5-3	1700024G13Rik	8.84	5.84942	6.81287	1.51126	1.29754
615	CCTGGAGCAGATAGAAGAC	1700024G13Rik_CCDS36867.1_ex1_14:32377919-32377941:-_5-1	1700024G13Rik	2.54941	1.93041	2.41217	1.32066	1.0569
619	ACCGCACCTACCGACTGCA	1700024G13Rik_CCDS36867.1_ex2_14:32388264-32388286:-_5-5	1700024G13Rik	13.953	12.024	13.6438	1.16044	1.02266
616	GACGGACATCAGATCATCC	1700024G13Rik_CCDS36867.1_ex1_14:32377936-32377958:-_5-2	1700024G13Rik	9.86261	8.55607	9.89993	1.1527	0.99623
618	ACTGCAGGGTCTGCAAGGT	1700024G13Rik_CCDS36867.1_ex2_14:32388251-32388273:-_5-4	1700024G13Rik	11.6909	10.9808	13.8409	1.06467	0.844667
624	CTAGCATCAATTTGGGCCA	1700024P04Rik_CCDS49342.1_ex0_13:98984416-98984438:-_5-5	1700024P04Rik	45.2201	30.5758	34.3665	1.47895	1.31582
622	AAGGAAGTTGTCCCTAACA	1700024P04Rik_CCDS49342.1_ex0_13:98984363-98984385:-_5-3	1700024P04Rik	2.51842	2.15597	2.2808	1.16812	1.10418
621	TTCATGATGTCCACAGAAT	1700024P04Rik_CCDS49342.1_ex0_13:98984331-98984353:+_5-2	1700024P04Rik	11.8149	11.2063	10.918	1.0543	1.08215
623	GTAAAGGGAGTAATTTCCA	1700024P04Rik_CCDS49342.1_ex0_13:98984399-98984421:+_5-4	1700024P04Rik	1.89866	2.18416	2.51069	0.869284	0.756229
620	ATCTTCGAACGCATTGCTA	1700024P04Rik_CCDS49342.1_ex0_13:98984294-98984316:-_5-1	1700024P04Rik	7.91036	10.9244	8.94754	0.724101	0.884082
625	GTCCTCCTAGGCAGCGACT	1700024P16Rik_CCDS51250.1_ex0_4:104913656-104913678:-_5-1	1700024P16Rik	15.9363	10.7552	14.235	1.48173	1.11952
629	CATAGAGGTTCACGAATGG	1700024P16Rik_CCDS51250.1_ex2_4:104948766-104948788:-_5-5	1700024P16Rik	10.0485	7.34372	7.00992	1.36832	1.43348
627	AAGGTCTTAATCCCGCCAT	1700024P16Rik_CCDS51250.1_ex1_4:104945573-104945595:-_5-3	1700024P16Rik	11.567	11.2909	12.3959	1.02445	0.933132
626	GCTTTCGAGACACGCCAGC	1700024P16Rik_CCDS51250.1_ex1_4:104945185-104945207:-_5-2	1700024P16Rik	7.56949	7.79482	7.40401	0.971092	1.02235
628	GACCGAGGGTCTCAATGGA	1700024P16Rik_CCDS51250.1_ex2_4:104948721-104948743:-_5-4	1700024P16Rik	9.45977	10.5015	9.27595	0.900804	1.01982
634	AAGAGGCCTTCAAATCATA	1700025F22Rik_CCDS50394.1_ex2_19:11146728-11146750:-_5-5	1700025F22Rik	5.74119	4.15776	5.53207	1.38084	1.0378
633	TAATCTGTTCTAGCTGATC	1700025F22Rik_CCDS50394.1_ex1_19:11142445-11142467:-_5-4	1700025F22Rik	4.84253	3.76304	5.56491	1.28687	0.870191
631	AAGTGTATATTCTACCCTG	1700025F22Rik_CCDS50394.1_ex1_19:11142343-11142365:-_5-2	1700025F22Rik	3.16917	2.4661	3.06899	1.28509	1.03264
630	CATACTTACATATTGCCAC	1700025F22Rik_CCDS50394.1_ex1_19:11142327-11142349:+_5-1	1700025F22Rik	3.69597	4.41151	3.62729	0.837802	1.01894
632	GCATCTTCGCAACACTAGT	1700025F22Rik_CCDS50394.1_ex1_19:11142401-11142423:-_5-3	1700025F22Rik	8.18925	11.2345	9.37447	0.728936	0.873569
635	GGGTTGATGAACTAATCCA	1700025G04Rik_CCDS35737.1_ex2_1:151921054-151921076:+_5-1	1700025G04Rik	3.13818	2.57888	2.87194	1.21688	1.0927
637	TTAAGCCTTGTGTTCGAGC	1700025G04Rik_CCDS35737.1_ex2_1:151921091-151921113:+_5-3	1700025G04Rik	13.4572	11.883	14.2678	1.13248	0.94319
636	AAACTAATAAAGAAATCCC	1700025G04Rik_CCDS35737.1_ex2_1:151921071-151921093:-_5-2	1700025G04Rik	1.09296	1.08458	1.19705	1.00773	0.913051
639	GAGTATAGGATCAAACCCG	1700025G04Rik_CCDS35737.1_ex3_1:151980497-151980519:-_5-5	1700025G04Rik	4.19178	4.72165	5.17082	0.887779	0.810661
638	GGTCAAATACATGAAAAAT	1700025G04Rik_CCDS35737.1_ex3_1:151980471-151980493:-_5-4	1700025G04Rik	1.96063	2.21235	2.24796	0.88622	0.872183
640	GGCGCAAACAGCTGCGAAA	1700026D08Rik_CCDS21413.1_ex3_7:83791697-83791719:-_5-1	1700026D08Rik	21.1423	11.4037	13.8409	1.85399	1.52753
641	GAGCGTCTCTACCTCAAAA	1700026D08Rik_CCDS21413.1_ex4_7:83793196-83793218:+_5-2	1700026D08Rik	6.51589	5.05998	6.41878	1.28773	1.01513
643	GATCACTTTATCGCCATAG	1700026D08Rik_CCDS21413.1_ex4_7:83793390-83793412:+_5-4	1700026D08Rik	7.5385	6.04678	7.17412	1.2467	1.05079
642	GACCATCGCCCCGATGGGC	1700026D08Rik_CCDS21413.1_ex4_7:83793229-83793251:-_5-3	1700026D08Rik	17.2998	14.3641	16.3368	1.20438	1.05895
644	AGCTTTCGGTATCGGAAGA	1700026D08Rik_CCDS21413.1_ex4_7:83793419-83793441:-_5-5	1700026D08Rik	11.505	15.7456	12.2645	0.730679	0.938073
649	GAATGCCCACGACAAAATC	1700026L06Rik_CCDS15845.1_ex3_2:28695928-28695950:-_5-5	1700026L06Rik	6.29897	5.31373	4.90809	1.18542	1.28339
646	ATGATCAGAATCCGCCGGT	1700026L06Rik_CCDS15845.1_ex2_2:28693767-28693789:+_5-2	1700026L06Rik	15.7813	13.7438	17.0921	1.14825	0.923311
645	TCATTGCTTTGGCTGACCA	1700026L06Rik_CCDS15845.1_ex2_2:28693644-28693666:+_5-1	1700026L06Rik	13.4263	13.8566	13.2826	0.968943	1.01082
648	GGCATCACCTGCTCGATAC	1700026L06Rik_CCDS15845.1_ex3_2:28695898-28695920:+_5-4	1700026L06Rik	8.53012	9.09176	8.68481	0.938225	0.982189
647	CAATAACTCCACCCACCGG	1700026L06Rik_CCDS15845.1_ex2_2:28693779-28693801:-_5-3	1700026L06Rik	10.2964	11.2627	12.2973	0.914206	0.837291
653	TTCTATTTGCTCCACTCCA	1700028K03Rik_CCDS19504.1_ex2_5:107545795-107545817:+_5-4	1700028K03Rik	14.077	10.6706	11.5091	1.31923	1.22311
650	ATTCTGATACACTGGAAAG	1700028K03Rik_CCDS19504.1_ex1_5:107543968-107543990:+_5-1	1700028K03Rik	6.7638	5.59567	6.45162	1.20876	1.04839
652	GCTAAGGAGTGTATGACAT	1700028K03Rik_CCDS19504.1_ex2_5:107545710-107545732:+_5-3	1700028K03Rik	6.39194	5.76483	7.7981	1.10878	0.819679
654	ATTCTTCAGGCCCATGGAG	1700028K03Rik_CCDS19504.1_ex2_5:107545807-107545829:-_5-5	1700028K03Rik	8.80902	10.1068	10.3269	0.871597	0.853019
651	CGATTGTATTTTCTCTGTC	1700028K03Rik_CCDS19504.1_ex1_5:107543992-107544014:+_5-2	1700028K03Rik	17.1138	23.3017	21.6899	0.734447	0.789024
659	GATTATGATATAGAGAGTC	1700028P14Rik_CCDS29708.1_ex4_19:23616575-23616597:-_5-5	1700028P14Rik	3.07621	1.39472	1.82103	2.20561	1.68927
657	TGAGGAAACACTATGCCCC	1700028P14Rik_CCDS29708.1_ex3_19:23593038-23593060:-_5-3	1700028P14Rik	6.11305	4.72165	5.30218	1.29469	1.15293
656	ATGCCCCGGGATTTTGGAA	1700028P14Rik_CCDS29708.1_ex3_19:23593026-23593048:-_5-2	1700028P14Rik	9.14988	7.68205	8.32356	1.19107	1.09928
658	TCGGAAGCACGTGAACAGA	1700028P14Rik_CCDS29708.1_ex3_19:23593115-23593137:-_5-4	1700028P14Rik	4.50166	4.69345	5.4007	0.959137	0.833532
655	ACCCTGAATTGCCTCCCAC	1700028P14Rik_CCDS29708.1_ex2_19:23592154-23592176:-_5-1	1700028P14Rik	12.2797	13.4055	12.1003	0.91602	1.01483
661	GCAGCACTGACAATCCACG	1700029F12Rik_CCDS36755.1_ex1_13:97030256-97030278:+_5-2	1700029F12Rik	16.9279	10.6424	14.0051	1.5906	1.2087
660	GTGAGTCTCATAGCAGTCG	1700029F12Rik_CCDS36755.1_ex1_13:97030213-97030235:+_5-1	1700029F12Rik	13.7981	11.009	11.8047	1.25335	1.16886
663	CATTGGTTCTCCGGGTCAG	1700029F12Rik_CCDS36755.1_ex1_13:97030355-97030377:+_5-4	1700029F12Rik	18.5083	17.1271	19.4567	1.08064	0.951257
662	AGTCCACGCAGTATAGCAG	1700029F12Rik_CCDS36755.1_ex1_13:97030305-97030327:+_5-3	1700029F12Rik	20.9874	22.2585	21.6899	0.942892	0.967611
664	GACAGCTGTGGAGCTCAAG	1700029F12Rik_CCDS36755.1_ex1_13:97030401-97030423:-_5-5	1700029F12Rik	5.46229	6.38511	6.02468	0.855474	0.906652
667	CTACGCAAGGAGCTAGGTA	1700029H14Rik_CCDS40233.1_ex7_8:13562153-13562175:-_5-3	1700029H14Rik	8.09629	4.18595	5.7948	1.93416	1.39717
666	GACCTCAAGTGTGCAAAAA	1700029H14Rik_CCDS40233.1_ex5_8:13558842-13558864:-_5-2	1700029H14Rik	5.27637	3.28374	5.00661	1.60682	1.05388
669	TGGAGTTCCGCCCCGTCAC	1700029H14Rik_CCDS40233.1_ex7_8:13562238-13562260:+_5-5	1700029H14Rik	16.0602	16.1967	13.9065	0.991574	1.15487
665	AGCAGGACGATGCCTGCAA	1700029H14Rik_CCDS40233.1_ex5_8:13558781-13558803:-_5-1	1700029H14Rik	20.1507	21.5818	20.836	0.933687	0.967108
668	GGGTGGCTTGCACCAGAAG	1700029H14Rik_CCDS40233.1_ex7_8:13562202-13562224:-_5-4	1700029H14Rik	10.2964	11.2063	12.6257	0.918806	0.815512
673	TACTACCCTACCATCCACC	1700029I15Rik_CCDS16445.1_ex1_2:92383271-92383293:-_5-4	1700029I15Rik	7.69344	4.89081	7.04276	1.57304	1.09239
671	GAGGAATTTTCAGCCCCGC	1700029I15Rik_CCDS16445.1_ex1_2:92383226-92383248:+_5-2	1700029I15Rik	9.92459	7.56927	9.21027	1.31117	1.07756
670	TCTCAGCAATCTGTTCCGG	1700029I15Rik_CCDS16445.1_ex1_2:92383208-92383230:+_5-1	1700029I15Rik	25.3567	27.7564	27.864	0.913545	0.910016
674	CTCTTCTCTCTTTAGACTA	1700029I15Rik_CCDS16445.1_ex2_2:92383432-92383454:+_5-5	1700029I15Rik	8.43716	10.1068	6.97708	0.834804	1.20927
672	CAGCCTCTCTCAGGCCTGG	1700029I15Rik_CCDS16445.1_ex1_2:92383256-92383278:+_5-3	1700029I15Rik	13.4882	17.4373	17.3549	0.773529	0.777202
676	AAGCTTTCATCCCTAGTAG	1700029J07Rik_CCDS22283.1_ex5_8:45970366-45970388:-_5-2	1700029J07Rik	6.39194	4.10137	5.49923	1.55849	1.16233
675	GGACAAGTATCAGCCACCG	1700029J07Rik_CCDS22283.1_ex4_8:45968071-45968093:-_5-1	1700029J07Rik	13.984	11.4883	11.9361	1.21724	1.17158
678	GGAATCAAAGTATCCTGCC	1700029J07Rik_CCDS22283.1_ex5_8:45970481-45970503:+_5-4	1700029J07Rik	6.05107	5.51109	6.5173	1.09798	0.928463
677	CGTGAATTTGAATCAAGTG	1700029J07Rik_CCDS22283.1_ex5_8:45970428-45970450:-_5-3	1700029J07Rik	6.4849	6.55428	6.71435	0.989416	0.965828
679	AATAGACAGATCCTACCGG	1700029J07Rik_CCDS22283.1_ex5_8:45970526-45970548:-_5-5	1700029J07Rik	14.5418	15.2099	15.1545	0.956075	0.959571
682	CGTCGTAACCATGGAAGTG	1700029P11Rik_CCDS37152.1_ex0_15:81980761-81980783:-_5-3	1700029P11Rik	5.24538	4.04498	3.85717	1.29676	1.3599
89807	TACGACGACGACCCGAAGG	1700029P11Rik_CCDS37152.1_ex0_15:81980775-81980797:+_5-4	1700029P11Rik	1	1	1	1	1
680	CTCCAGGGCTGTGGTCGCC	1700029P11Rik_CCDS37152.1_ex0_15:81980648-81980670:+_5-1	1700029P11Rik	20.4915	23.5836	18.8327	0.868889	1.08808
683	AAGACGGCGTGCATATTCA	1700029P11Rik_CCDS37152.1_ex0_15:81980801-81980823:-_5-5	1700029P11Rik	1.99162	2.29694	2.14944	0.867077	0.926578
681	CGGTCCGCTGCGGCCCGAA	1700029P11Rik_CCDS37152.1_ex0_15:81980667-81980689:+_5-2	1700029P11Rik	26.0694	30.9141	24.9083	0.843285	1.04662
688	ATACCCGAGTGTTTTGAAG	1700030F18Rik_CCDS37207.1_ex2_15:99929825-99929847:+_5-5	1700030F18Rik	6.42293	4.86262	4.87525	1.32088	1.31746
684	GGCACCGATGAGTGCGCTC	1700030F18Rik_CCDS37207.1_ex1_15:99927792-99927814:-_5-1	1700030F18Rik	18.2604	14.2795	16.6652	1.27878	1.09572
686	GACAGGTCAGCGTTCCACA	1700030F18Rik_CCDS37207.1_ex1_15:99927840-99927862:+_5-3	1700030F18Rik	6.36095	5.65206	6.55014	1.12542	0.971117
685	TGGGTAGCTTGACGTAGAC	1700030F18Rik_CCDS37207.1_ex1_15:99927824-99927846:+_5-2	1700030F18Rik	5.52427	5.90581	5.7948	0.935396	0.953316
687	TATAGACAAGCTTCAGTGG	1700030F18Rik_CCDS37207.1_ex1_15:99927863-99927885:-_5-4	1700030F18Rik	11.536	12.4469	11.5748	0.926816	0.996643
693	TCCGGACGAGAAAAGTGAA	1700030J22Rik_CCDS22695.1_ex1_8:116973548-116973570:-_5-5	1700030J22Rik	7.44554	3.76304	6.5173	1.9786	1.14243
691	TTTTCTCCATGCACGTCGG	1700030J22Rik_CCDS22695.1_ex0_8:116971845-116971867:+_5-3	1700030J22Rik	17.2688	14.9844	18.8655	1.15245	0.915361
690	TATCTGGTGCATGGAGGAG	1700030J22Rik_CCDS22695.1_ex0_8:116971800-116971822:-_5-2	1700030J22Rik	13.1783	11.6292	10.4582	1.13321	1.26009
689	TGCTAACTGTCTCGGGCAT	1700030J22Rik_CCDS22695.1_ex0_8:116971777-116971799:+_5-1	1700030J22Rik	16.2152	14.4205	18.5043	1.12446	0.876293
692	CAACCTCCAAGAGGGACCG	1700030J22Rik_CCDS22695.1_ex0_8:116971996-116972018:+_5-4	1700030J22Rik	8.5921	7.96399	7.10844	1.07887	1.20872
698	CCCGACAGGCGAGCAGTGC	1700030K09Rik_CCDS22414.1_ex1_8:72449558-72449580:+_5-5	1700030K09Rik	17.3927	13.1517	14.2678	1.32247	1.21902
697	CCATACAGTCGACTCGCGT	1700030K09Rik_CCDS22414.1_ex1_8:72449522-72449544:+_5-4	1700030K09Rik	17.8576	16.4223	13.6767	1.0874	1.3057
696	GGCCGAGGAGACTTTAAGC	1700030K09Rik_CCDS22414.1_ex1_8:72449502-72449524:-_5-3	1700030K09Rik	2.42546	2.35333	2.47785	1.03065	0.978855
695	GCCGAGTGGTAACGGTAGC	1700030K09Rik_CCDS22414.1_ex0_8:72445220-72445242:+_5-2	1700030K09Rik	14.2939	18.9034	14.6947	0.756157	0.972724
694	AGACTCTGCTCGATGGATG	1700030K09Rik_CCDS22414.1_ex0_8:72445103-72445125:-_5-1	1700030K09Rik	12.4346	24.3167	19.8179	0.511362	0.627443
702	TGGGATTCCATGAGAAAGA	1700031F05Rik_CCDS53160.1_ex3_X:102864169-102864191:+_5-4	1700031F05Rik	2.48743	1.33833	1.85387	1.85861	1.34175
699	CAGAATAACACGTTCAACC	1700031F05Rik_CCDS53160.1_ex1_X:102860896-102860918:-_5-1	1700031F05Rik	7.72443	6.9208	6.94423	1.11612	1.11235
703	TTCAGAGTCACCGGAATAC	1700031F05Rik_CCDS53160.1_ex3_X:102864204-102864226:+_5-5	1700031F05Rik	6.20601	5.76483	5.66343	1.07653	1.0958
701	GCAGGGAATAGTCATGGGC	1700031F05Rik_CCDS53160.1_ex3_X:102864146-102864168:+_5-3	1700031F05Rik	14.4179	13.913	13.0198	1.03629	1.10738
700	TTGACAGGGGCGGCAGTGC	1700031F05Rik_CCDS53160.1_ex2_X:102861157-102861179:+_5-2	1700031F05Rik	11.6909	12.9262	12.6586	0.904437	0.923556
707	TGACAGAACTTACCAGTAA	1700034E13Rik_CCDS29249.1_ex0_18:52660563-52660585:-_5-4	1700034E13Rik	6.42293	4.12957	5.17082	1.55535	1.24215
706	CAGAAGTCAGAACCATTAC	1700034E13Rik_CCDS29249.1_ex0_18:52660550-52660572:+_5-3	1700034E13Rik	1.24791	1.36653	1.78819	0.913196	0.697861
704	GCCACAGTGTCTGAAAAAG	1700034E13Rik_CCDS29249.1_ex0_18:52660473-52660495:+_5-1	1700034E13Rik	8.25123	9.68384	9.50584	0.852061	0.868017
708	CGCCTTAAACGAAGCTGCT	1700034E13Rik_CCDS29249.1_ex1_18:52663588-52663610:+_5-5	1700034E13Rik	10.4514	12.5315	11.739	0.834012	0.890311
705	TCTGTTGCCTAAAGAACTA	1700034E13Rik_CCDS29249.1_ex0_18:52660509-52660531:+_5-2	1700034E13Rik	3.13818	3.87582	3.85717	0.809683	0.813596
713	ACATTCATACCGAAACTGC	1700034F02Rik_CCDS48763.1_ex3_11:29560640-29560662:-_5-5	1700034F02Rik	8.37518	9.26093	9.40731	0.904357	0.890284
711	ACGATACTGCACCTGGGAT	1700034F02Rik_CCDS48763.1_ex2_11:29557777-29557799:-_5-3	1700034F02Rik	24.7989	27.5872	27.5027	0.898927	0.901688
709	TGGTGTAATATTCATCAGC	1700034F02Rik_CCDS48763.1_ex0_11:29553718-29553740:-_5-1	1700034F02Rik	13.6742	15.4919	15.9098	0.882667	0.859477
710	TACCGAAACGTTTTCGACA	1700034F02Rik_CCDS48763.1_ex0_11:29553741-29553763:+_5-2	1700034F02Rik	5.49328	6.72344	4.71104	0.817034	1.16604
712	TTCCAGATTAACGGAGTCC	1700034F02Rik_CCDS48763.1_ex3_11:29560460-29560482:-_5-4	1700034F02Rik	2.54941	3.76304	4.31695	0.677486	0.590558
716	ATTAGCAAGAGAGTCTGCA	1700034J05Rik_CCDS51956.1_ex1_6:146953212-146953234:+_5-3	1700034J05Rik	3.91289	2.24055	3.06899	1.7464	1.27498
718	AGCAAGCTAAGCATCACAC	1700034J05Rik_CCDS51956.1_ex1_6:146953260-146953282:-_5-5	1700034J05Rik	5.05945	3.79123	4.48115	1.33451	1.12905
715	CTTATCCATCCACTGGCTA	1700034J05Rik_CCDS51956.1_ex1_6:146953176-146953198:+_5-2	1700034J05Rik	16.3391	12.7852	13.4796	1.27797	1.21214
717	GAGTCCACATCGATATCCC	1700034J05Rik_CCDS51956.1_ex1_6:146953237-146953259:+_5-4	1700034J05Rik	13.7671	13.6874	16.3039	1.00582	0.844404
714	AGGGGTAGTGCTGTTGAGG	1700034J05Rik_CCDS51956.1_ex1_6:146953017-146953039:+_5-1	1700034J05Rik	15.4715	25.9238	20.212	0.596807	0.765458
719	TAGTGAGTGCAAGCTTGGA	1700034O15Rik_CCDS20054.1_ex0_6:41684611-41684633:+_5-1	1700034O15Rik	8.34419	6.13136	6.74719	1.3609	1.23669
720	AAGACAAAGTGTCCTCTGA	1700034O15Rik_CCDS20054.1_ex0_6:41684647-41684669:+_5-2	1700034O15Rik	2.14656	1.81763	1.88671	1.18096	1.13773
722	TCTTTTATGTTGTAGACCA	1700034O15Rik_CCDS20054.1_ex1_6:41685199-41685221:+_5-4	1700034O15Rik	5.43131	4.74984	5.10513	1.14347	1.06389
723	CACTTTGAGGCTTCATCAG	1700034O15Rik_CCDS20054.1_ex1_6:41685240-41685262:+_5-5	1700034O15Rik	21.3592	23.8092	21.3615	0.8971	0.999895
721	CTCCTCTACCCACCTTCAG	1700034O15Rik_CCDS20054.1_ex0_6:41684660-41684682:-_5-3	1700034O15Rik	20.6155	25.4163	23.3976	0.811115	0.881094
724	GGGACAGCCTGGGAAATAC	1700037C18Rik_CCDS49746.1_ex1_16:3906840-3906862:-_5-1	1700037C18Rik	6.51589	4.32693	4.02138	1.50589	1.62031
725	GCAGCCTGACACGGCCTGA	1700037C18Rik_CCDS49746.1_ex1_16:3906948-3906970:-_5-2	1700037C18Rik	10.2345	9.48648	8.06083	1.07885	1.26965
727	TTGGCCAGCAGGCTGCATG	1700037C18Rik_CCDS49746.1_ex1_16:3907006-3907028:+_5-4	1700037C18Rik	27.6808	26.3467	24.4485	1.05064	1.13221
726	GGCTAGGCCGGCTCATGGC	1700037C18Rik_CCDS49746.1_ex1_16:3906972-3906994:-_5-3	1700037C18Rik	19.283	20.2567	19.7523	0.951933	0.976244
728	CTTCCGACTGCGACACCTC	1700037C18Rik_CCDS49746.1_ex1_16:3907052-3907074:-_5-5	1700037C18Rik	22.0719	25.8674	22.281	0.853274	0.990617
733	ATCAAAGTGGACGTGGCTC	1700037H04Rik_CCDS16756.1_ex3_2:131151680-131151702:+_5-5	1700037H04Rik	7.87937	5.84942	7.37117	1.34703	1.06894
732	ATGCAGCTTTTCATCAAAG	1700037H04Rik_CCDS16756.1_ex3_2:131151668-131151690:+_5-4	1700037H04Rik	3.94387	3.00179	4.15274	1.31384	0.949704
730	GGTAATCTCATACCTGTGC	1700037H04Rik_CCDS16756.1_ex2_2:131148255-131148277:+_5-2	1700037H04Rik	9.45977	7.48469	10.1955	1.26388	0.927837
729	AGTACTCGGCACACAAAGA	1700037H04Rik_CCDS16756.1_ex1_2:131147244-131147266:-_5-1	1700037H04Rik	3.69597	3.19915	3.13467	1.1553	1.17906
731	TCGGTGGTCATGGTTACTC	1700037H04Rik_CCDS16756.1_ex3_2:131151644-131151666:-_5-3	1700037H04Rik	6.60886	6.89261	7.83094	0.958833	0.843941
736	CCCCCCTACAGATTATGGA	1700039E15Rik_CCDS21238.1_ex2_7:45286870-45286892:+_5-3	1700039E15Rik	12.1867	6.86441	9.50584	1.77535	1.28203
737	AGGCCACATACGACAGGCC	1700039E15Rik_CCDS21238.1_ex2_7:45286894-45286916:-_5-4	1700039E15Rik	11.0712	7.45649	7.50253	1.48477	1.47566
734	GATCAACCTGATAGCCAAC	1700039E15Rik_CCDS21238.1_ex1_7:45286456-45286478:+_5-1	1700039E15Rik	6.73281	5.90581	6.97708	1.14003	0.96499
738	AGCATCCCAATCTGGTACA	1700039E15Rik_CCDS21238.1_ex2_7:45287062-45287084:+_5-5	1700039E15Rik	10.4824	11.3191	11.2464	0.926078	0.932064
735	TCCAGGCTAGGTATTCCAG	1700039E15Rik_CCDS21238.1_ex1_7:45286527-45286549:-_5-2	1700039E15Rik	14.201	22.9352	18.3072	0.619178	0.775701
741	TGAAGTAGCATGTCCAGCA	1700040L02Rik_CCDS23905.1_ex5_10:68525608-68525630:+_5-3	1700040L02Rik	13.4882	11.1499	11.4763	1.20971	1.17531
740	GACAGCATTAAGTGGCTCG	1700040L02Rik_CCDS23905.1_ex4_10:68516369-68516391:-_5-2	1700040L02Rik	14.4489	14.0822	17.0921	1.02604	0.845352
89867	AGACACATAGTAGTCCAAG	1700040L02Rik_CCDS23905.1_ex5_10:68525688-68525710:+_5-4	1700040L02Rik	1	1	1	1	1
742	AGGTCAATGATCTGGTCAG	1700040L02Rik_CCDS23905.1_ex6_10:68533844-68533866:+_5-5	1700040L02Rik	6.4849	6.55428	7.7981	0.989416	0.8316
739	CTCGTAGAGCCTGTAGTGC	1700040L02Rik_CCDS23905.1_ex3_10:68509741-68509763:+_5-1	1700040L02Rik	13.2093	15.1535	15.6471	0.8717	0.844202
743	CCATTCCTTTGTATATTCG	1700042B14Rik_CCDS53232.1_ex0_X:155125577-155125599:-_2-1	1700042B14Rik	3.23115	2.12777	3.26603	1.51856	0.989318
744	GTGGTCCTCAAGCCTACAG	1700042B14Rik_CCDS53232.1_ex0_X:155125689-155125711:-_2-2	1700042B14Rik	9.49075	10.9526	9.17743	0.866531	1.03414
745	ATACTGGGACACCGGCGCC	1700042G07Rik_CCDS51276.1_ex0_4:116173480-116173502:-_5-1	1700042G07Rik	16.8659	12.9544	14.2678	1.30195	1.1821
749	GCCACAAACATCAGTGACA	1700042G07Rik_CCDS51276.1_ex0_4:116173571-116173593:+_5-5	1700042G07Rik	3.20016	2.60707	3.59444	1.22749	0.890307
747	CATACCGGCAGAAACCCCG	1700042G07Rik_CCDS51276.1_ex0_4:116173521-116173543:+_5-3	1700042G07Rik	8.90198	9.8812	11.3121	0.900901	0.786943
746	TATGTTCAAGTGTAGCCGC	1700042G07Rik_CCDS51276.1_ex0_4:116173498-116173520:+_5-2	1700042G07Rik	23.8693	26.7414	21.8541	0.892596	1.09221
748	TGGTGGCAGTTGGGCCTCG	1700042G07Rik_CCDS51276.1_ex0_4:116173536-116173558:-_5-4	1700042G07Rik	15.1306	19.4391	19.9821	0.77836	0.757206
752	GTAGAATTCTTGATCTCGA	1700049G17Rik_CCDS21032.1_ex0_7:27912150-27912172:-_4-3	1700049G17Rik	13.4263	13.0108	13.0855	1.03193	1.02604
753	CAGAAAATTCTATTAGTAA	1700049G17Rik_CCDS21032.1_ex0_7:27912204-27912226:-_4-4	1700049G17Rik	1.71273	1.81763	1.82103	0.942284	0.940528
750	GACTACAGGGTTATAAAGG	1700049G17Rik_CCDS21032.1_ex0_7:27912087-27912109:-_4-1	1700049G17Rik	2.20854	2.52249	2.2808	0.875538	0.968316
751	ACAACCATAGTATATTCAG	1700049G17Rik_CCDS21032.1_ex0_7:27912108-27912130:-_4-2	1700049G17Rik	1.09296	1.33833	1.42693	0.816662	0.765953
757	CTTAAACACGTCGAAGTCA	1700052N19Rik_CCDS56676.1_ex3_10:4450656-4450678:-_5-4	1700052N19Rik	4.71858	3.50929	5.03945	1.3446	0.936328
758	GAGAACTTCTTCGAGTCGC	1700052N19Rik_CCDS56676.1_ex3_10:4450689-4450711:+_5-5	1700052N19Rik	11.1641	8.58426	10.5896	1.30053	1.05425
755	CCTTTTAAATGAAGGCGAT	1700052N19Rik_CCDS56676.1_ex2_10:4439634-4439656:+_5-2	1700052N19Rik	2.73534	2.43791	2.14944	1.122	1.27258
756	TCATGAAGCCATCATGCAG	1700052N19Rik_CCDS56676.1_ex2_10:4439715-4439737:+_5-3	1700052N19Rik	5.36933	5.56747	5.82764	0.96441	0.921356
754	CACATATGGAATCAATACC	1700052N19Rik_CCDS56676.1_ex2_10:4439599-4439621:+_5-1	1700052N19Rik	2.98324	7.76663	5.46639	0.38411	0.545743
761	GAAGTTGTGGACCCTATGC	1700054O13Rik_CCDS30012.1_ex0_X:9847161-9847183:-_5-3	1700054O13Rik	10.3894	6.49789	8.32356	1.59889	1.24819
759	GTGTACCGTATACTGCAGG	1700054O13Rik_CCDS30012.1_ex0_X:9847126-9847148:+_5-1	1700054O13Rik	6.67083	6.58247	8.19219	1.01342	0.814291
763	CTCCAGGATGTAGTCGGTG	1700054O13Rik_CCDS30012.1_ex0_X:9847210-9847232:-_5-5	1700054O13Rik	9.3668	11.5165	13.0855	0.81334	0.715815
762	GTAATCAAGCATGGCAAGA	1700054O13Rik_CCDS30012.1_ex0_X:9847189-9847211:-_5-4	1700054O13Rik	16.2462	20.6232	19.3253	0.787761	0.840668
760	GCAATATACCCCCTGCATA	1700054O13Rik_CCDS30012.1_ex0_X:9847149-9847171:+_5-2	1700054O13Rik	17.6406	22.9634	20.4419	0.768208	0.862964
764	GAAGGAGGCCTTCAACACA	1700055N04Rik_CCDS57128.1_ex1_19:3963871-3963893:+_5-1	1700055N04Rik	8.43716	6.32872	6.5173	1.33315	1.29458
768	TGACGATCTTGCCTACCCG	1700055N04Rik_CCDS57128.1_ex6_19:3965638-3965660:-_5-5	1700055N04Rik	12.8065	10.7834	9.57152	1.18761	1.33798
766	AAACAGCTTCATGACGCCC	1700055N04Rik_CCDS57128.1_ex1_19:3963962-3963984:+_5-3	1700055N04Rik	6.45392	6.4415	7.2398	1.00193	0.891449
767	GATGATCATACCTTTAGTG	1700055N04Rik_CCDS57128.1_ex3_19:3964902-3964924:+_5-4	1700055N04Rik	4.87352	5.39831	6.55014	0.902786	0.744033
765	ACAAAGACGGCTAAGTTCA	1700055N04Rik_CCDS57128.1_ex1_19:3963896-3963918:+_5-2	1700055N04Rik	11.0402	18.5087	13.611	0.596487	0.811122
773	CGCCTTCGGGATCGGAGTC	1700056E22Rik_CCDS56665.1_ex0_1:184033718-184033740:+_5-5	1700056E22Rik	35.6448	21.1307	21.7227	1.68687	1.6409
772	ACTCCGGAGAGCTACTCGG	1700056E22Rik_CCDS56665.1_ex0_1:184033695-184033717:-_5-4	1700056E22Rik	16.9589	14.1667	15.877	1.19709	1.06814
769	GCGCTCCTTGGCTCGCCGA	1700056E22Rik_CCDS56665.1_ex0_1:184033425-184033447:+_5-1	1700056E22Rik	19.5309	16.9862	19.4567	1.14981	1.00382
771	GACCGCGTTGGGAGGAGGT	1700056E22Rik_CCDS56665.1_ex0_1:184033548-184033570:+_5-3	1700056E22Rik	23.2805	23.8938	25.2367	0.974333	0.922485
770	GGGCTCCAAAACATCGCAC	1700056E22Rik_CCDS56665.1_ex0_1:184033501-184033523:+_5-2	1700056E22Rik	21.2972	23.6964	22.8722	0.898754	0.931143
774	CATTAGACCTTTCACCATG	1700057G04Rik_CCDS23406.1_ex2_9:92351037-92351059:+_5-1	1700057G04Rik	29.6331	25.3317	26.3533	1.1698	1.12445
89904	CAATCTGCGTGTGCAACAT	1700057G04Rik_CCDS23406.1_ex3_9:92352655-92352677:+_5-5	1700057G04Rik	1	1	1	1	1
777	CTGTAAACTTTGGCCGACA	1700057G04Rik_CCDS23406.1_ex3_9:92352592-92352614:-_5-4	1700057G04Rik	9.80064	9.93759	10.3269	0.986219	0.949043
775	AACAACAATCACATCGTAG	1700057G04Rik_CCDS23406.1_ex2_9:92351102-92351124:-_5-2	1700057G04Rik	6.11305	6.66705	5.49923	0.916904	1.11162
776	TTTGAATAACATAACCCAC	1700057G04Rik_CCDS23406.1_ex3_9:92352562-92352584:-_5-3	1700057G04Rik	3.66498	6.13136	5.13798	0.597744	0.713312
781	ACCTACATCGAGTACTACG	1700061G19Rik_CCDS37666.1_ex1_17:56877535-56877557:+_5-4	1700061G19Rik	8.00332	7.28733	9.21027	1.09825	0.868957
779	GCCGCGCTCATGATCAAGT	1700061G19Rik_CCDS37666.1_ex1_17:56877453-56877475:-_5-2	1700061G19Rik	16.2152	19.1289	14.7933	0.847679	1.09612
782	TATATAACCAGGGTACCAC	1700061G19Rik_CCDS37666.1_ex5_17:56882634-56882656:+_5-5	1700061G19Rik	5.43131	6.80802	5.63059	0.79778	0.964607
778	CGCTTAGATGTCCAGTAGC	1700061G19Rik_CCDS37666.1_ex1_17:56877366-56877388:-_5-1	1700061G19Rik	9.02593	11.6011	10.3269	0.778027	0.874024
780	GTACTTGGAACCGATCGCC	1700061G19Rik_CCDS37666.1_ex1_17:56877493-56877515:-_5-3	1700061G19Rik	14.2939	19.7774	17.1578	0.72274	0.833085
786	GGGCCAGCATAGATCCCAC	1700065I17Rik_CCDS29260.1_ex2_18:56594458-56594480:-_5-4	1700065I17Rik	12.0938	9.11996	10.294	1.32608	1.17483
783	GGACGATATTCACTTGCCC	1700065I17Rik_CCDS29260.1_ex1_18:56592379-56592401:+_5-1	1700065I17Rik	10.2035	7.85121	11.2464	1.29961	0.907265
787	AGCGAGAGGCTTTGCCATG	1700065I17Rik_CCDS29260.1_ex2_18:56594507-56594529:+_5-5	1700065I17Rik	17.4547	15.3791	19.3253	1.13496	0.903204
784	CCCGGTTCTCACTAAAGCA	1700065I17Rik_CCDS29260.1_ex1_18:56592396-56592418:+_5-2	1700065I17Rik	20.8634	22.9634	22.0511	0.908552	0.946138
785	AGGCATGACGTAACGGGTC	1700065I17Rik_CCDS29260.1_ex1_18:56592425-56592447:-_5-3	1700065I17Rik	9.95558	11.6856	11.1807	0.85195	0.890423
792	CGGCGTTTACCTCATCCAC	1700066B19Rik_CCDS50252.1_ex1_18:35728709-35728731:+_5-5	1700066B19Rik	8.25123	6.63886	8.02799	1.24287	1.02781
790	GCGATCTGCATTGTGCTGG	1700066B19Rik_CCDS50252.1_ex1_18:35728614-35728636:+_5-3	1700066B19Rik	36.6674	34.9177	33.9396	1.05011	1.08037
791	TTGGGCCTGCACTGCATCA	1700066B19Rik_CCDS50252.1_ex1_18:35728642-35728664:+_5-4	1700066B19Rik	6.20601	6.9208	7.89663	0.896718	0.785907
788	GCCCCCTCGAGGTGGCGAC	1700066B19Rik_CCDS50252.1_ex1_18:35728550-35728572:+_5-1	1700066B19Rik	18.8182	21.8074	20.6061	0.862927	0.913233
789	AGGACAAAGGCCGCGATGA	1700066B19Rik_CCDS50252.1_ex1_18:35728589-35728611:-_5-2	1700066B19Rik	5.21439	6.52608	5.76196	0.799008	0.904969
796	GCTTAAAGGCTCCAAAGTC	1700066M21Rik_CCDS48264.1_ex1_1:57382944-57382966:-_5-4	1700066M21Rik	3.51004	2.57888	3.20035	1.36107	1.09677
794	CGTTACCTGCACGTCCCCA	1700066M21Rik_CCDS48264.1_ex0_1:57377931-57377953:-_5-2	1700066M21Rik	26.7512	26.2339	27.3385	1.01972	0.978514
793	GCAGTTCGTTGCTGCGCTG	1700066M21Rik_CCDS48264.1_ex0_1:57377851-57377873:-_5-1	1700066M21Rik	16.1842	17.7756	18.5043	0.910472	0.874618
795	TAACTATTGGGAAAACGGC	1700066M21Rik_CCDS48264.1_ex1_1:57382825-57382847:-_5-3	1700066M21Rik	5.74119	7.08997	6.78003	0.809762	0.846779
797	CTTTTAACCTGACTCAGAA	1700066M21Rik_CCDS48264.1_ex1_1:57382989-57383011:+_5-5	1700066M21Rik	14.077	18.706	16.7637	0.752539	0.83973
798	CAAGCGCAGTGTTAGCTGC	1700067K01Rik_CCDS22464.2_ex2_8:84003130-84003152:-_5-1	1700067K01Rik	7.63147	4.41151	5.07229	1.7299	1.50454
801	TCGGAAGATGGACACGTCG	1700067K01Rik_CCDS22464.2_ex3_8:84003338-84003360:-_5-4	1700067K01Rik	13.953	13.0672	12.0346	1.0678	1.15941
800	AACCTCCCGCAGAAAAAGC	1700067K01Rik_CCDS22464.2_ex3_8:84003301-84003323:-_5-3	1700067K01Rik	7.32158	7.51288	9.01322	0.974537	0.812316
799	TTTGGGTTCGTGGACCTGG	1700067K01Rik_CCDS22464.2_ex2_8:84003178-84003200:+_5-2	1700067K01Rik	8.93297	11.9676	11.1151	0.746431	0.803682
802	GACTGGCAGTATAGGCAGC	1700067K01Rik_CCDS22464.2_ex3_8:84003369-84003391:-_5-5	1700067K01Rik	9.86261	17.3527	14.0379	0.568362	0.70257
806	TCTCCGAAGGAAAAAGCTG	1700067P10Rik_CCDS28857.1_ex1_17:48090502-48090524:+_5-4	1700067P10Rik	2.73534	2.12777	2.01807	1.28554	1.35542
804	CCCTCTTCTAGTCTCTCGG	1700067P10Rik_CCDS28857.1_ex1_17:48090405-48090427:+_5-2	1700067P10Rik	20.2746	16.5351	19.9165	1.22616	1.01798
807	CACGCTCATAGGCACCAGC	1700067P10Rik_CCDS28857.1_ex1_17:48090568-48090590:-_5-5	1700067P10Rik	12.9614	10.9244	12.5929	1.18647	1.02926
803	ACCTTTGAAGCTTGCTCCG	1700067P10Rik_CCDS28857.1_ex1_17:48090324-48090346:-_5-1	1700067P10Rik	12.8685	14.3077	15.1873	0.899408	0.847315
805	GTCCAGCTTGCCATCAGAG	1700067P10Rik_CCDS28857.1_ex1_17:48090429-48090451:+_5-3	1700067P10Rik	4.99747	8.16135	6.61582	0.612334	0.755382
808	AGGATTCATTAAATGCCAT	1700074P13Rik_CCDS20041.1_ex2_6:40926015-40926037:+_5-1	1700074P13Rik	10.2035	8.30232	7.04276	1.22899	1.44879
811	CAAGAACTAAAATCCGACT	1700074P13Rik_CCDS20041.1_ex2_6:40926210-40926232:-_5-4	1700074P13Rik	1.58877	1.33833	1.65682	1.18713	0.958929
810	CATACATGTTGATAGTAGC	1700074P13Rik_CCDS20041.1_ex2_6:40926063-40926085:+_5-3	1700074P13Rik	7.50751	6.61066	7.33833	1.13567	1.02306
809	GGAACTATAGCCATAGCTA	1700074P13Rik_CCDS20041.1_ex2_6:40926040-40926062:-_5-2	1700074P13Rik	5.1834	4.72165	4.90809	1.0978	1.05609
812	CCAACACAAGGCTCTGGGC	1700074P13Rik_CCDS20041.1_ex3_6:40928562-40928584:+_5-5	1700074P13Rik	15.4405	28.0947	24.8755	0.549587	0.620711
817	GATCGTCCACAAAACCACC	1700080E11Rik_CCDS23463.1_ex1_9:105144649-105144671:+_5-5	1700080E11Rik	7.56949	4.97539	7.92947	1.52138	0.954603
813	CTAACACTAGAGCAGCTCC	1700080E11Rik_CCDS23463.1_ex1_9:105144479-105144501:-_5-1	1700080E11Rik	10.0795	7.28733	9.80141	1.38316	1.02838
815	TTTGATTTGGACTCAGCGA	1700080E11Rik_CCDS23463.1_ex1_9:105144528-105144550:+_5-3	1700080E11Rik	17.3927	16.9016	13.7095	1.02906	1.26866
816	AGGGAGCTTCGGTAGTCGG	1700080E11Rik_CCDS23463.1_ex1_9:105144546-105144568:+_5-4	1700080E11Rik	26.6582	30.3784	29.3418	0.877536	0.908538
814	AGGCATTTGACATAGAAAT	1700080E11Rik_CCDS23463.1_ex1_9:105144498-105144520:+_5-2	1700080E11Rik	4.6566	5.51109	5.03945	0.844952	0.924029
818	TTCGAGGCGTACCAAAGAT	1700080O16Rik_CCDS53068.1_ex0_X:51969305-51969327:-_5-1	1700080O16Rik	6.4849	4.80623	6.45162	1.34927	1.00516
820	TCAGATGCCTTAGTAAAGA	1700080O16Rik_CCDS53068.1_ex0_X:51969436-51969458:+_5-3	1700080O16Rik	3.72696	3.25554	4.21843	1.1448	0.883495
821	ATTGAGTATCTGCTGCCTA	1700080O16Rik_CCDS53068.1_ex0_X:51969573-51969595:+_5-4	1700080O16Rik	8.12728	8.04857	9.86709	1.00978	0.823675
819	CTCTCTTGTCAATGCCCTC	1700080O16Rik_CCDS53068.1_ex0_X:51969355-51969377:-_5-2	1700080O16Rik	19.376	21.5536	19.391	0.898965	0.999225
822	ATGTACTGGGTTCATCCCA	1700080O16Rik_CCDS53068.1_ex0_X:51969680-51969702:-_5-5	1700080O16Rik	16.773	20.8488	23.7917	0.804506	0.704992
827	ACGAATCCACTGAAGGGCG	1700084C01Rik_CCDS15466.1_ex2_1:169933810-169933832:+_5-5	1700084C01Rik	16.0602	12.0804	15.3187	1.32945	1.04841
824	TTACCTAATTTTAGGCTCC	1700084C01Rik_CCDS15466.1_ex1_1:169933098-169933120:-_5-2	1700084C01Rik	7.50751	5.73664	6.45162	1.30869	1.16366
826	TCAGGGTGTCTTTGAGGAC	1700084C01Rik_CCDS15466.1_ex2_1:169933706-169933728:-_5-4	1700084C01Rik	10.6683	9.45829	12.2973	1.12793	0.86753
825	GGTCATGTAAAGAGGGCAC	1700084C01Rik_CCDS15466.1_ex2_1:169933685-169933707:-_5-3	1700084C01Rik	5.1834	5.79303	6.18889	0.894765	0.837533
823	TAGCGATTTCACGTGATAG	1700084C01Rik_CCDS15466.1_ex0_1:169930090-169930112:-_5-1	1700084C01Rik	2.70435	3.39651	3.72581	0.796213	0.725842
829	TCACGACTGTACGCCCCAT	1700088E04Rik_CCDS27633.1_ex3_15:79136329-79136351:+_5-2	1700088E04Rik	21.0803	13.4337	16.8622	1.56921	1.25015
830	CAGCTTGTGCCAAGCCAAT	1700088E04Rik_CCDS27633.1_ex3_15:79136344-79136366:-_5-3	1700088E04Rik	8.03431	5.51109	6.22173	1.45785	1.29133
831	TTCCAGCAACGCCACATCA	1700088E04Rik_CCDS27633.1_ex4_15:79139250-79139272:-_5-4	1700088E04Rik	23.3425	16.1685	19.3253	1.4437	1.20787
832	TATTTTGCAGTTATGATGA	1700088E04Rik_CCDS27633.1_ex4_15:79139289-79139311:-_5-5	1700088E04Rik	16.3081	12.1367	14.8589	1.3437	1.09753
828	CCAAAATATCTTTGCCACT	1700088E04Rik_CCDS27633.1_ex2_15:79135716-79135738:-_5-1	1700088E04Rik	20.5845	15.943	17.7161	1.29113	1.16191
837	TGACCGCGAGGACTCCCGA	1700092M07Rik_CCDS50382.1_ex1_19:8741066-8741088:-_5-5	1700092M07Rik	10.3584	9.06357	11.2136	1.14286	0.92374
834	GTTAGATCTTTGTTTACGG	1700092M07Rik_CCDS50382.1_ex1_19:8740997-8741019:-_5-2	1700092M07Rik	2.36348	2.09958	1.98523	1.12569	1.19053
833	GCAACGAAGTGGACAACTC	1700092M07Rik_CCDS50382.1_ex1_19:8740974-8740996:+_5-1	1700092M07Rik	3.75795	3.70665	3.43024	1.01384	1.09553
835	GATAGCCTGCGCCACAGCA	1700092M07Rik_CCDS50382.1_ex1_19:8741035-8741057:-_5-3	1700092M07Rik	5.33834	5.51109	4.15274	0.968655	1.2855
836	CTATCCATGTTCAGCCGTC	1700092M07Rik_CCDS50382.1_ex1_19:8741051-8741073:+_5-4	1700092M07Rik	32.267	37.5398	36.5669	0.859542	0.882412
842	ATTTGTATCCTCCTCTTAC	1700093K21Rik_CCDS24477.1_ex3_11:23518800-23518822:-_5-5	1700093K21Rik	5.58625	4.4679	4.94093	1.25031	1.13061
840	AGACCCTCTGTACAGGCGA	1700093K21Rik_CCDS24477.1_ex2_11:23518089-23518111:-_5-3	1700093K21Rik	24.3961	23.2453	24.5142	1.04951	0.99518
839	GCTTTTGCACAAGAATGCT	1700093K21Rik_CCDS24477.1_ex1_11:23517318-23517340:+_5-2	1700093K21Rik	9.45977	9.43009	10.0641	1.00315	0.939948
838	ATGTTGTCTCCTAAGGATG	1700093K21Rik_CCDS24477.1_ex1_11:23517278-23517300:+_5-1	1700093K21Rik	3.47905	3.9604	4.80956	0.87846	0.723361
841	TAGAAAAATTGCCAGTAAG	1700093K21Rik_CCDS24477.1_ex3_11:23518788-23518810:+_5-4	1700093K21Rik	4.22277	5.53928	5.7948	0.762331	0.728717
846	TAAGGCAGCTTGACGGACC	1700094D03Rik_CCDS50968.1_ex3_3:90065506-90065528:-_5-5	1700094D03Rik	10.3894	8.13316	8.09367	1.27741	1.28365
89849	ACTTAAGAAGACTGTCGAC	1700094D03Rik_CCDS50968.1_ex1_3:90063228-90063250:+_5-1	1700094D03Rik	1	1	1	1	1
843	TTTTCATATTCACTGTATG	1700094D03Rik_CCDS50968.1_ex2_3:90064433-90064455:+_5-2	1700094D03Rik	3.07621	3.56568	3.46308	0.862726	0.888286
844	GCAGACAACATTGGACCAA	1700094D03Rik_CCDS50968.1_ex2_3:90064454-90064476:+_5-3	1700094D03Rik	4.00585	5.37011	4.77672	0.745953	0.838619
845	AAACCTATTTGCTGCCCTA	1700094D03Rik_CCDS50968.1_ex2_3:90064478-90064500:+_5-4	1700094D03Rik	7.38356	9.9094	8.61913	0.745107	0.856648
847	CGCTCACCTTGACGATGAG	1700101E01Rik_CCDS50551.1_ex5_2:29054806-29054828:+_5-1	1700101E01Rik	15.0376	11.2345	13.4796	1.33852	1.11558
849	TACGGGCATGGAGAACGAA	1700101E01Rik_CCDS50551.1_ex5_2:29054862-29054884:-_5-3	1700101E01Rik	2.27051	1.78944	2.8391	1.26884	0.79973
850	CGGTGGTCGACATCCGTAC	1700101E01Rik_CCDS50551.1_ex5_2:29054878-29054900:-_5-4	1700101E01Rik	10.5753	10.7834	8.52061	0.980704	1.24115
848	ATGAGCGGGTTCTGAAACA	1700101E01Rik_CCDS50551.1_ex5_2:29054820-29054842:+_5-2	1700101E01Rik	6.29897	7.96399	8.22504	0.790932	0.765829
851	GACCACCGTCAGCGGCCGT	1700101E01Rik_CCDS50551.1_ex5_2:29054891-29054913:+_5-5	1700101E01Rik	38.5886	56.1198	40.048	0.687611	0.963559
854	GCAGCCTCTATACCCCAAA	1700102P08Rik_CCDS23524.1_ex0_9:108393504-108393526:+_5-3	1700102P08Rik	5.86514	3.65026	4.48115	1.60677	1.30885
853	ATGGTGTGTCCCGAAGGCC	1700102P08Rik_CCDS23524.1_ex0_9:108393460-108393482:-_5-2	1700102P08Rik	12.5896	10.0222	11.1151	1.25617	1.13266
856	ATCCGAACTATTGAAGAAT	1700102P08Rik_CCDS23524.1_ex2_9:108397203-108397225:+_5-5	1700102P08Rik	2.79731	2.4943	2.34648	1.12148	1.19213
852	CACCTCCCAGCCGGTACAC	1700102P08Rik_CCDS23524.1_ex0_9:108393357-108393379:+_5-1	1700102P08Rik	24.52	21.9484	22.8065	1.11717	1.07513
855	CTGGACCGCAGGAAGGATA	1700102P08Rik_CCDS23524.1_ex1_9:108395282-108395304:+_5-4	1700102P08Rik	6.17502	6.13136	7.14128	1.00712	0.864694
861	ACGCCTTCTGCCAGATGAG	1700106J16Rik_CCDS48881.1_ex0_11:88294327-88294349:+_5-5	1700106J16Rik	6.42293	5.56747	6.94423	1.15365	0.92493
859	GAAGGTGGCCGGGGTACAA	1700106J16Rik_CCDS48881.1_ex0_11:88294253-88294275:+_5-3	1700106J16Rik	8.3132	7.45649	8.15935	1.11489	1.01886
858	TCTCCAAGTCGGCCGGCAG	1700106J16Rik_CCDS48881.1_ex0_11:88294222-88294244:-_5-2	1700106J16Rik	25.9455	24.4858	23.102	1.05961	1.12308
857	GGAGGGCCATGACTGAGAC	1700106J16Rik_CCDS48881.1_ex0_11:88294194-88294216:-_5-1	1700106J16Rik	15.0686	19.9184	18.7999	0.756519	0.801528
860	GAAGGCGTCCTCCAAGTAA	1700106J16Rik_CCDS48881.1_ex0_11:88294314-88294336:-_5-4	1700106J16Rik	5.77218	7.73844	6.18889	0.74591	0.932667
865	GAAGAGTGGATTAAAGGCT	1700109H08Rik_CCDS39001.1_ex2_5:3577283-3577305:+_5-4	1700109H08Rik	2.33249	1.90222	1.78819	1.2262	1.30439
866	CTTCTCTTCAAAAGTCCCT	1700109H08Rik_CCDS39001.1_ex2_5:3577316-3577338:-_5-5	1700109H08Rik	10.0176	11.6011	10.7538	0.863504	0.931536
862	CGACTTTTCTATAGCTTGG	1700109H08Rik_CCDS39001.1_ex1_5:3575651-3575673:+_5-1	1700109H08Rik	7.35257	9.62745	9.27595	0.763709	0.792649
863	AAGATGGATAATACCGGGC	1700109H08Rik_CCDS39001.1_ex1_5:3575687-3575709:+_5-2	1700109H08Rik	14.2939	19.9184	15.6143	0.717625	0.915439
864	CATTCCGAATATGTTCTGC	1700109H08Rik_CCDS39001.1_ex1_5:3575732-3575754:-_5-3	1700109H08Rik	9.8936	14.5896	12.1331	0.678125	0.815421
867	ACAGTTTCTGCAGCGCCTG	1700110M21Rik_CCDS36999.1_ex0_14:101198420-101198442:-_5-1	1700110M21Rik	21.4212	17.6628	21.3943	1.21278	1.00126
871	AAGAGAAGAAATAAGCCTG	1700110M21Rik_CCDS36999.1_ex0_14:101198940-101198962:+_5-5	1700110M21Rik	1.49581	1.25375	1.49262	1.19307	1.00214
868	GGGGTATGTGTGCCAAGCA	1700110M21Rik_CCDS36999.1_ex0_14:101198533-101198555:-_5-2	1700110M21Rik	23.1565	22.2021	23.9231	1.04299	0.967958
870	TGATAGTTAGAGGGAGAGA	1700110M21Rik_CCDS36999.1_ex0_14:101198768-101198790:+_5-4	1700110M21Rik	1.15494	1.14097	1.75534	1.01224	0.657957
869	GTAAGTCCTGAAGGCGGGA	1700110M21Rik_CCDS36999.1_ex0_14:101198667-101198689:+_5-3	1700110M21Rik	7.41455	8.55607	9.60436	0.866583	0.771998
873	GGATGGTGTCACTTCTGCC	1700112E06Rik_CCDS49415.1_ex3_14:22584435-22584457:-_5-2	1700112E06Rik	58.545	48.9303	52.1007	1.1965	1.12369
874	ACATGCCACGTTTCCCAGG	1700112E06Rik_CCDS49415.1_ex3_14:22584471-22584493:-_5-3	1700112E06Rik	12.4036	10.3887	13.5781	1.19396	0.913501
872	GGGTAACCCTGGCAACACG	1700112E06Rik_CCDS49415.1_ex2_14:22577920-22577942:-_5-1	1700112E06Rik	7.97233	7.25913	7.56821	1.09825	1.0534
875	GTGGCATGTCCCAATGAGC	1700112E06Rik_CCDS49415.1_ex3_14:22584483-22584505:+_5-4	1700112E06Rik	15.6574	15.9994	15.4172	0.978626	1.01558
876	TTGTGCAGAACAAAGCACC	1700112E06Rik_CCDS49415.1_ex4_14:22596421-22596443:-_5-5	1700112E06Rik	5.15241	5.34192	4.94093	0.964524	1.0428
880	ATTTCACTGGATGATGACA	1700113H08Rik_CCDS48660.1_ex3_10:87226003-87226025:-_5-4	1700113H08Rik	3.16917	2.86082	3.06899	1.10778	1.03264
877	AAATGTCTCCATGTGAGTA	1700113H08Rik_CCDS48660.1_ex2_10:87165067-87165089:-_5-1	1700113H08Rik	7.38356	7.11816	6.81287	1.03728	1.08377
878	GAACTCATAGTCCAATGAC	1700113H08Rik_CCDS48660.1_ex3_10:87225885-87225907:+_5-2	1700113H08Rik	3.01423	2.94541	3.62729	1.02337	0.830988
879	CGAGGGAAATGGTGCTCGC	1700113H08Rik_CCDS48660.1_ex3_10:87225951-87225973:-_5-3	1700113H08Rik	18.0125	18.0857	19.4895	0.99595	0.924214
881	GATTGGGTAGTCGTCTAGG	1700113H08Rik_CCDS48660.1_ex3_10:87226068-87226090:-_5-5	1700113H08Rik	9.18087	10.6143	10.2283	0.864957	0.897592
885	CTGCTTGGGTACTCCAAGA	1700122O11Rik_CCDS57099.1_ex0_17:48037250-48037272:+_5-5	1700122O11Rik	8.18925	6.89261	7.33833	1.18812	1.11596
883	GTTCCACGGAGTGAGGGCA	1700122O11Rik_CCDS57099.1_ex0_17:48037158-48037180:+_5-3	1700122O11Rik	19.407	18.1139	19.9493	1.07138	0.972814
884	GGAGAAATCTTCCCACCAC	1700122O11Rik_CCDS57099.1_ex0_17:48037178-48037200:+_5-4	1700122O11Rik	10.4514	9.76842	9.37447	1.06992	1.11488
90210	CTGATAGAGGCTCCATCAG	1700122O11Rik_CCDS57099.1_ex0_17:48037006-48037028:+_5-1	1700122O11Rik	1	1	1	1	1
882	CTAGATCCCAATGAGGGCA	1700122O11Rik_CCDS57099.1_ex0_17:48037056-48037078:+_5-2	1700122O11Rik	11.9698	19.8056	19.6537	0.604365	0.609035
887	CCCACCTGAAGTTTAAACA	1700123I01Rik_CCDS50364.1_ex3_19:6212151-6212173:+_5-2	1700123I01Rik	5.36933	4.07318	4.64536	1.31822	1.15585
889	AAATGGAAACGGAAACTCA	1700123I01Rik_CCDS50364.1_ex5_19:6213337-6213359:+_5-4	1700123I01Rik	2.17755	2.09958	2.34648	1.03714	0.928005
886	ATAAGTTCAAAATCAGATA	1700123I01Rik_CCDS50364.1_ex0_19:6195746-6195768:+_5-1	1700123I01Rik	1.09296	1.05639	1.06568	1.03462	1.0256
888	AACAAACGGGTAGGGCGTC	1700123I01Rik_CCDS50364.1_ex3_19:6212183-6212205:-_5-3	1700123I01Rik	9.24285	9.23273	8.09367	1.0011	1.14198
890	TGTGGCCCCTGCCTGCTAG	1700123I01Rik_CCDS50364.1_ex5_19:6213372-6213394:-_5-5	1700123I01Rik	22.6607	38.442	28.1596	0.589478	0.804725
891	CATCCTGCCCTAGGGGATC	1700123K08Rik_CCDS51680.1_ex1_5:138562533-138562555:+_5-1	1700123K08Rik	2.51842	1.76125	1.75534	1.42991	1.43472
895	ACTCTTGTAGTTGAACTGG	1700123K08Rik_CCDS51680.1_ex4_5:138564279-138564301:+_5-5	1700123K08Rik	7.16664	7.31552	7.50253	0.979649	0.95523
892	CCCTCCATGTTGGAGGATC	1700123K08Rik_CCDS51680.1_ex2_5:138562846-138562868:-_5-2	1700123K08Rik	19.407	20.2849	18.8984	0.95672	1.02691
893	GGGTATCTATGTCTGGGGA	1700123K08Rik_CCDS51680.1_ex2_5:138562881-138562903:+_5-3	1700123K08Rik	19.283	22.4559	21.3943	0.858708	0.901315
894	GCTGTTTTGAGTCAGTTCA	1700123K08Rik_CCDS51680.1_ex2_5:138562924-138562946:-_5-4	1700123K08Rik	14.201	16.9016	16.3368	0.840215	0.869263
898	CGGCACTGCCTTAGCGACC	1700123O20Rik_CCDS27099.1_ex0_14:54689990-54690012:-_5-4	1700123O20Rik	29.2922	22.8224	30.9182	1.28349	0.947409
896	GGGAAGTGATGTAAGACAT	1700123O20Rik_CCDS27099.1_ex0_14:54689898-54689920:-_5-1	1700123O20Rik	2.23953	1.76125	2.24796	1.27156	0.996248
897	CGCTGGGGACCTGACCAAC	1700123O20Rik_CCDS27099.1_ex0_14:54689950-54689972:-_5-2	1700123O20Rik	13.0854	11.0372	11.2464	1.18557	1.16352
90027	TGTAGAAAACGTTCCCGCT	1700123O20Rik_CCDS27099.1_ex0_14:54689965-54689987:-_5-3	1700123O20Rik	1	1	1	1	1
899	GCTGACACTCAAAGATACA	1700123O20Rik_CCDS27099.1_ex0_14:54690075-54690097:-_5-5	1700123O20Rik	1.21692	1.25375	1.52546	0.970623	0.797739
902	GTGTTAATATGGCCCCCTA	1700125H20Rik_CCDS48872.1_ex2_11:85173294-85173316:-_5-3	1700125H20Rik	5.98909	3.53749	5.26934	1.69304	1.13659
900	GCTCTGGTCCGTCATGCCA	1700125H20Rik_CCDS48872.1_ex1_11:85172887-85172909:+_5-1	1700125H20Rik	26.4723	31.2807	31.3123	0.846282	0.845427
904	GTGCTTGATCTCCCAGGCT	1700125H20Rik_CCDS48872.1_ex2_11:85173334-85173356:-_5-5	1700125H20Rik	9.18087	11.1499	10.1627	0.823401	0.903393
903	CGGCAATAATGCTGCAGAA	1700125H20Rik_CCDS48872.1_ex2_11:85173315-85173337:-_5-4	1700125H20Rik	12.3417	15.7456	14.1036	0.783816	0.875073
901	TCAGTGTAAAGAATACCTG	1700125H20Rik_CCDS48872.1_ex2_11:85173183-85173205:+_5-2	1700125H20Rik	1.96063	4.74984	3.16751	0.412779	0.618982
907	GAGGAAAGTTTGTTTACAC	1700129C05Rik_CCDS27166.1_ex4_14:59142590-59142612:+_5-3	1700129C05Rik	4.81154	2.55069	3.72581	1.88637	1.29141
909	AAAAGAGGGTTGGTACGAA	1700129C05Rik_CCDS27166.1_ex4_14:59142692-59142714:+_5-5	1700129C05Rik	3.66498	2.32513	3.33172	1.57625	1.10003
905	TAGACCCAGAGCTTAAAAT	1700129C05Rik_CCDS27166.1_ex3_14:59142141-59142163:-_5-1	1700129C05Rik	2.73534	2.04319	2.8391	1.33876	0.963452
906	AAGTAGCTAGTTTCCAGAT	1700129C05Rik_CCDS27166.1_ex4_14:59142470-59142492:+_5-2	1700129C05Rik	6.02008	5.73664	6.41878	1.04941	0.937886
908	GGCATAGCAATCATTAAGG	1700129C05Rik_CCDS27166.1_ex4_14:59142620-59142642:+_5-4	1700129C05Rik	2.73534	4.10137	3.13467	0.666932	0.872608
913	GTACGCCCGCTTCTTGAGG	1810009A15Rik_CCDS29555.1_ex1_19:8889231-8889253:-_5-4	1810009A15Rik	13.953	10.5579	11.739	1.32158	1.1886
910	ATTAAGCAGGGATCGGCGA	1810009A15Rik_CCDS29555.1_ex1_19:8889158-8889180:+_5-1	1810009A15Rik	12.8995	11.8548	12.5601	1.08812	1.02702
912	TCGGGGCTGTGATAGACGA	1810009A15Rik_CCDS29555.1_ex1_19:8889193-8889215:+_5-3	1810009A15Rik	4.96648	5.20095	4.54684	0.954919	1.09229
914	GTGATGTTGGCACGAGCAC	1810009A15Rik_CCDS29555.1_ex2_19:8890005-8890027:-_5-5	1810009A15Rik	13.5812	17.4091	16.5667	0.780121	0.81979
911	ACGGAAACGCCAGGTGGTC	1810009A15Rik_CCDS29555.1_ex1_19:8889176-8889198:+_5-2	1810009A15Rik	15.5334	20.3413	19.4567	0.763641	0.79836
921	AAATTGCTCACCACCCTCA	1810009J06Rik_CCDS20042.1_ex2_6:40966646-40966668:-_5-4	1810009J06Rik	14.7278	10.4451	14.1036	1.41002	1.04426
920	GTGTTCACCAAGGCGAACC	1810009J06Rik_CCDS20042.1_ex2_6:40966613-40966635:-_5-3	1810009J06Rik	10.9162	10.7552	10.4582	1.01497	1.04379
918	GCATTAGCCATCAGTGTGG	1810009J06Rik_CCDS20042.1_ex1_6:40966252-40966274:+_5-2	1810009J06Rik	24.7989	25.1061	24.35	0.987763	1.01844
922	CGACACCCAGACTATAACA	1810009J06Rik_CCDS20042.1_ex2_6:40966688-40966710:+_5-5	1810009J06Rik	7.25961	9.20454	9.50584	0.788699	0.7637
916	AAGCATTCGGTTCCTTACC	1810009J06Rik_CCDS20042.1_ex1_6:40966215-40966237:+_5-1	1810009J06Rik	7.10467	9.17634	9.473	0.774237	0.749991
924	TACCTATCTCAGTCTCAGC	1810011H11Rik_CCDS49438.1_ex1_14:32805159-32805181:-_5-1	1810011H11Rik	20.9564	9.11996	13.6438	2.29786	1.53596
925	ATTTCAAATATGCCATCAT	1810011H11Rik_CCDS49438.1_ex2_14:32806779-32806801:+_5-2	1810011H11Rik	16.4941	8.47149	12.8556	1.94701	1.28302
928	CGGATCATGCAGATCTTCA	1810011H11Rik_CCDS49438.1_ex2_14:32806840-32806862:-_5-5	1810011H11Rik	7.10467	4.4397	5.56491	1.60026	1.27669
926	CCATCATTGGTATGGCAGT	1810011H11Rik_CCDS49438.1_ex2_14:32806791-32806813:+_5-3	1810011H11Rik	9.95558	8.21774	6.81287	1.21147	1.46129
927	TGGGAGTAGCCATATCTGC	1810011H11Rik_CCDS49438.1_ex2_14:32806809-32806831:+_5-4	1810011H11Rik	11.6909	13.7156	13.7423	0.852379	0.850722
933	GCGAGCGGCTGTGTCGAAG	1810011O10Rik_CCDS22194.1_ex0_8:24438800-24438822:+_5-5	1810011O10Rik	12.2797	9.59926	12.166	1.27923	1.00935
930	GTTCCTGAAGAGCCTCTGC	1810011O10Rik_CCDS22194.1_ex0_8:24438734-24438756:+_5-2	1810011O10Rik	13.6742	10.868	11.9689	1.2582	1.14247
929	TCCTCCAAATCTTGGTCGA	1810011O10Rik_CCDS22194.1_ex0_8:24438669-24438691:+_5-1	1810011O10Rik	13.953	12.8416	13.5453	1.08655	1.0301
932	GCCGCTCGCAAGAAAGCTG	1810011O10Rik_CCDS22194.1_ex0_8:24438788-24438810:-_5-4	1810011O10Rik	10.0485	9.79662	12.0346	1.02572	0.834971
931	ATCTTTGAGAACATAGACC	1810011O10Rik_CCDS22194.1_ex0_8:24438761-24438783:-_5-3	1810011O10Rik	11.6909	11.6292	7.76526	1.0053	1.50554
937	TTGATATTGGAATTCAGAT	1810013L24Rik_CCDS49756.1_ex2_16:8842994-8843016:+_5-4	1810013L24Rik	2.11557	2.04319	2.34648	1.03543	0.901593
938	GGCTATCAGCGACGCAATA	1810013L24Rik_CCDS49756.1_ex2_16:8843014-8843036:+_5-5	1810013L24Rik	9.1189	9.85301	9.24311	0.925494	0.986562
936	TTATAGAGGTTGGTGACGG	1810013L24Rik_CCDS49756.1_ex1_16:8831378-8831400:-_5-3	1810013L24Rik	2.17755	3.25554	3.62729	0.668875	0.600325
934	TTGTGCTCGGGCTGCGCGG	1810013L24Rik_CCDS49756.1_ex0_16:8830602-8830624:-_5-1	1810013L24Rik	18.6323	28.3767	24.6784	0.656605	0.755002
935	CCGTGGCTCAGCTCTACAA	1810013L24Rik_CCDS49756.1_ex0_16:8830664-8830686:+_5-2	1810013L24Rik	9.30483	18.1421	12.8228	0.512885	0.725648
942	CATGGCGGTAGGGGTAGAC	1810019J16Rik_CCDS38905.1_ex0_4:133528481-133528503:-_5-4	1810019J16Rik	10.2035	7.82302	8.38924	1.30429	1.21626
940	AGGGTCTGCCGAAGCCGCC	1810019J16Rik_CCDS38905.1_ex0_4:133528332-133528354:+_5-2	1810019J16Rik	26.5652	20.5668	21.7227	1.29165	1.22292
943	TAGGCAAGCTGTGCCGCGT	1810019J16Rik_CCDS38905.1_ex0_4:133528562-133528584:-_5-5	1810019J16Rik	13.984	11.9676	13.3811	1.16849	1.04506
941	CGTGCACCCCCCAGCCGCC	1810019J16Rik_CCDS38905.1_ex0_4:133528390-133528412:+_5-3	1810019J16Rik	12.3727	13.5183	14.3335	0.915255	0.8632
939	ACCGGGCCGTCGCACCAGG	1810019J16Rik_CCDS38905.1_ex0_4:133528083-133528105:+_5-1	1810019J16Rik	51.2938	62.2944	56.4029	0.823409	0.909418
944	TTTGGCATAAGCAAAAGAC	1810024B03Rik_CCDS50702.1_ex0_2:127186986-127187008:-_5-1	1810024B03Rik	6.45392	5.00359	4.38263	1.28986	1.47261
947	AAGCGTCGGCCTCTAGATG	1810024B03Rik_CCDS50702.1_ex0_2:127187139-127187161:-_5-4	1810024B03Rik	21.2043	20.2849	20.0478	1.04532	1.05768
946	AAAGAGAGTTCTGAAAACA	1810024B03Rik_CCDS50702.1_ex0_2:127187104-127187126:+_5-3	1810024B03Rik	1.12395	1.08458	1.26273	1.0363	0.890098
948	TGATGGAATATGCATCCCG	1810024B03Rik_CCDS50702.1_ex0_2:127187183-127187205:-_5-5	1810024B03Rik	15.8123	15.3509	16.2711	1.03006	0.971805
945	ATGGCCATCCCAATCCAAT	1810024B03Rik_CCDS50702.1_ex0_2:127187022-127187044:+_5-2	1810024B03Rik	5.7102	6.35692	5.72911	0.898266	0.996698
953	CGGCTGCGTCACGTGAACC	1810026J23Rik_CCDS22908.1_ex1_9:21593415-21593437:+_5-5	1810026J23Rik	6.70182	5.68025	6.15605	1.17985	1.08866
951	GACCCCGATGCGTCCAGCA	1810026J23Rik_CCDS22908.1_ex1_9:21593312-21593334:-_5-3	1810026J23Rik	7.78641	6.97719	7.69958	1.11598	1.01128
949	CCGCGCGGCCCTGTACGTG	1810026J23Rik_CCDS22908.1_ex1_9:21593228-21593250:+_5-1	1810026J23Rik	17.1138	18.9598	14.2021	0.90264	1.20502
952	ACGCGCAACCGCCACTCGG	1810026J23Rik_CCDS22908.1_ex1_9:21593355-21593377:+_5-4	1810026J23Rik	11.1641	15.4073	17.4205	0.7246	0.640859
950	GCGCTGGCGCCCAGTGAGG	1810026J23Rik_CCDS22908.1_ex1_9:21593277-21593299:+_5-2	1810026J23Rik	7.87937	11.2063	9.70288	0.703118	0.812065
957	GGCATCACATCAACAGAAA	1810030O07Rik_CCDS30024.1_ex4_X:12673090-12673112:-_5-4	1810030O07Rik	3.81992	3.05818	3.89001	1.24908	0.981981
954	ATCTGAAAATCTCGAAGCC	1810030O07Rik_CCDS30024.1_ex2_X:12664572-12664594:+_5-1	1810030O07Rik	8.5921	7.17455	7.30549	1.19758	1.17612
955	GATGAAAGTTTCATCTACC	1810030O07Rik_CCDS30024.1_ex2_X:12664590-12664612:-_5-2	1810030O07Rik	2.79731	2.35333	3.20035	1.18866	0.874064
956	TTTGTGGTTGACCGGAAGA	1810030O07Rik_CCDS30024.1_ex3_X:12669535-12669557:-_5-3	1810030O07Rik	4.28474	4.01679	4.28411	1.06671	1.00015
958	CCGCCGCGGCAGGTAGCAT	1810030O07Rik_CCDS30024.1_ex5_X:12673353-12673375:+_5-5	1810030O07Rik	7.16664	9.48648	7.10844	0.755458	1.00819
959	GACTACGAGAATATAACCT	1810033B17Rik_CCDS22069.1_ex1_8:3666065-3666087:+_5-1	1810033B17Rik	2.8283	1.73305	1.85387	1.63198	1.52562
960	GTTCTGTACAACCAAGGCG	1810033B17Rik_CCDS22069.1_ex2_8:3667039-3667061:-_5-2	1810033B17Rik	5.24538	5.00359	5.46639	1.04832	0.95957
961	AGAACATACAACATCATAA	1810033B17Rik_CCDS22069.1_ex2_8:3667060-3667082:-_5-3	1810033B17Rik	1.5268	1.53569	1.59114	0.994209	0.959563
963	CACACCGTGTCTGAAACTA	1810033B17Rik_CCDS22069.1_ex4_8:3667393-3667415:-_5-5	1810033B17Rik	6.98071	7.28733	9.57152	0.957925	0.729321
962	TGAAAGCAGAGCTTTCGAA	1810033B17Rik_CCDS22069.1_ex3_8:3667289-3667311:+_5-4	1810033B17Rik	7.87937	14.1103	10.2612	0.558411	0.767881
965	AAGATGAGGCACCTCAGTC	1810037I17Rik_CCDS38619.1_ex0_3:122924538-122924560:+_4-2	1810037I17Rik	5.55526	3.98859	4.1199	1.39279	1.3484
967	CCGAAACACTCCTACTGGC	1810037I17Rik_CCDS38619.1_ex0_3:122924573-122924595:+_4-4	1810037I17Rik	12.6206	12.3905	12.8556	1.01857	0.981715
966	TTCGGAAGCCCGTTCATCC	1810037I17Rik_CCDS38619.1_ex0_3:122924557-122924579:-_4-3	1810037I17Rik	7.10467	9.68384	8.78333	0.733662	0.80888
964	GGAAGGAGGAACCAAGATG	1810037I17Rik_CCDS38619.1_ex0_3:122924525-122924547:+_4-1	1810037I17Rik	3.75795	6.13136	4.77672	0.612906	0.78672
972	AGCCTTACACGGATCACAA	1810041L15Rik_CCDS49687.1_ex2_15:84417265-84417287:-_5-5	1810041L15Rik	15.2855	9.28912	10.4911	1.64553	1.457
971	TTTTGTTGTCCGAGAGCCG	1810041L15Rik_CCDS49687.1_ex2_15:84417217-84417239:+_5-4	1810041L15Rik	12.6825	8.95079	10.1955	1.41692	1.24393
969	CAAATATCGTAGTTCATGG	1810041L15Rik_CCDS49687.1_ex1_15:84406661-84406683:+_5-2	1810041L15Rik	9.39779	6.97719	8.02799	1.34693	1.17063
968	CTGGATCCCCCACCGAGTG	1810041L15Rik_CCDS49687.1_ex1_15:84406630-84406652:+_5-1	1810041L15Rik	21.2663	17.691	17.4862	1.20209	1.21617
970	TGCAACGAGACGGAGTTCC	1810041L15Rik_CCDS49687.1_ex2_15:84417149-84417171:-_5-3	1810041L15Rik	7.0117	7.11816	6.78003	0.985044	1.03417
975	AGAACAGCTCGTTCAGACT	1810043G02Rik_CCDS35954.1_ex3_10:77981663-77981685:-_5-3	1810043G02Rik	5.55526	2.55069	3.98854	2.17795	1.39281
976	CAGCACGGTCATGCGGTAA	1810043G02Rik_CCDS35954.1_ex3_10:77981755-77981777:-_5-4	1810043G02Rik	18.0125	8.58426	12.8556	2.09832	1.40114
977	CTGACCCGCGCGCTGATGG	1810043G02Rik_CCDS35954.1_ex4_10:77982886-77982908:+_5-5	1810043G02Rik	29.1682	28.715	32.1333	1.01578	0.907725
973	CCTAGAGGTAATCACACTC	1810043G02Rik_CCDS35954.1_ex2_10:77980526-77980548:+_5-1	1810043G02Rik	8.3132	9.17634	10.3925	0.905939	0.79992
974	CTGCGCACCGGTTCCAGGG	1810043G02Rik_CCDS35954.1_ex3_10:77981598-77981620:-_5-2	1810043G02Rik	12.3417	16.5069	13.6767	0.747669	0.902389
980	CCAGGAGGCCGCCTGAGTA	1810043H04Rik_CCDS36388.1_ex1_11:120099186-120099208:+_5-3	1810043H04Rik	11.9078	10.5297	9.73573	1.13088	1.22311
979	TGCAGGCGTCCACCGCCCC	1810043H04Rik_CCDS36388.1_ex1_11:120099169-120099191:+_5-2	1810043H04Rik	7.41455	7.28733	6.28741	1.01746	1.17927
981	AACGCAGAGGTCCTTACTC	1810043H04Rik_CCDS36388.1_ex1_11:120099198-120099220:-_5-4	1810043H04Rik	3.26214	3.28374	3.46308	0.993421	0.941975
982	CTCGAACTCGCGAACGCAG	1810043H04Rik_CCDS36388.1_ex1_11:120099210-120099232:-_5-5	1810043H04Rik	6.79478	8.04857	7.40401	0.844222	0.917717
978	GCTTATGGCAAGTGCGTGC	1810043H04Rik_CCDS36388.1_ex1_11:120099153-120099175:+_5-1	1810043H04Rik	10.3584	12.7852	12.2645	0.810188	0.844587
987	CGAATGACCTCTACACCTC	1810046K07Rik_CCDS52792.1_ex1_9:51291743-51291765:-_5-5	1810046K07Rik	14.2939	12.4751	13.4796	1.1458	1.06041
983	GAAATGAGTTGGGTCACTG	1810046K07Rik_CCDS52792.1_ex1_9:51291552-51291574:+_5-1	1810046K07Rik	6.82577	6.13136	7.99515	1.11326	0.853739
986	GCAAAGGGCTTGCTCATGC	1810046K07Rik_CCDS52792.1_ex1_9:51291724-51291746:+_5-4	1810046K07Rik	21.7931	19.7774	19.4567	1.10192	1.12008
985	TGCCCAGCCGTGGACTCGC	1810046K07Rik_CCDS52792.1_ex1_9:51291703-51291725:+_5-3	1810046K07Rik	26.0384	33.4798	28.1596	0.777735	0.924674
984	AGCCAGGTAGGATTCCAGC	1810046K07Rik_CCDS52792.1_ex1_9:51291669-51291691:+_5-2	1810046K07Rik	26.7821	37.6526	34.5964	0.711296	0.774131
988	GTAAATCAAAGCATGCTGA	1810055G02Rik_CCDS50342.1_ex1_19:3716522-3716544:+_5-1	1810055G02Rik	4.62561	3.02999	3.82433	1.52661	1.20952
991	TCAGGCTGGTAGCACGCGC	1810055G02Rik_CCDS50342.1_ex1_19:3717165-3717187:-_5-4	1810055G02Rik	12.6515	12.024	12.7243	1.05219	0.994285
990	CCTCAGGTGCCCAAATACA	1810055G02Rik_CCDS50342.1_ex1_19:3717009-3717031:+_5-3	1810055G02Rik	3.51004	4.49609	3.3974	0.780687	1.03316
992	AGCCCTACATTACCTACCC	1810055G02Rik_CCDS50342.1_ex1_19:3717224-3717246:+_5-5	1810055G02Rik	4.4087	5.68025	3.85717	0.776145	1.14299
989	ACACGGCGACTCTTGCTGC	1810055G02Rik_CCDS50342.1_ex1_19:3716898-3716920:+_5-2	1810055G02Rik	51.8826	71.9086	63.0039	0.721507	0.823481
996	TGATAAGAAATTGCTCATG	1810062G17Rik_CCDS57208.1_ex1_3:36479538-36479560:-_5-4	1810062G17Rik	3.44806	2.69166	3.26603	1.28102	1.05573
997	TGGGCCTTTTATACCCTGG	1810062G17Rik_CCDS57208.1_ex2_3:36481809-36481831:-_5-5	1810062G17Rik	12.6825	10.0786	10.1955	1.25837	1.24393
993	ATCTTAGTCACCTTGCACC	1810062G17Rik_CCDS57208.1_ex0_3:36476229-36476251:-_5-1	1810062G17Rik	42.6481	43.3478	39.7196	0.983857	1.07373
995	ATGTGGCTGGAGAAGCAAA	1810062G17Rik_CCDS57208.1_ex1_3:36479522-36479544:-_5-3	1810062G17Rik	8.15826	8.33052	8.75049	0.979323	0.93232
994	CCGACCTCCTGCATACGCA	1810062G17Rik_CCDS57208.1_ex1_3:36479487-36479509:+_5-2	1810062G17Rik	13.8911	14.4205	14.7933	0.963288	0.939014
1002	TTGCCTGCTATATGGAGGC	1810065E05Rik_CCDS24730.1_ex3_11:58423853-58423875:+_5-5	1810065E05Rik	9.58372	7.73844	9.57152	1.23846	1.00127
1000	TGGCATTCTCGGCGACACT	1810065E05Rik_CCDS24730.1_ex2_11:58422791-58422813:+_5-3	1810065E05Rik	18.2914	16.2531	17.3877	1.12541	1.05197
999	CTAGATGAATGTACTGGAC	1810065E05Rik_CCDS24730.1_ex2_11:58422772-58422794:+_5-2	1810065E05Rik	5.67921	5.96219	6.25457	0.952537	0.90801
998	GAGGTATTGCATGTACCCA	1810065E05Rik_CCDS24730.1_ex1_11:58422244-58422266:-_5-1	1810065E05Rik	17.6716	25.9519	22.9707	0.680936	0.769312
1001	ACTGATAAGTGCAATCAAG	1810065E05Rik_CCDS24730.1_ex2_11:58422853-58422875:+_5-4	1810065E05Rik	4.25376	8.18954	6.32025	0.519413	0.673036
1003	AATCCTCCAACGCCACCAC	2010001E11Rik_CCDS48539.1_ex0_10:39921990-39922012:-_4-2	2010001E11Rik	15.8743	19.8338	17.8475	0.800367	0.889443
1005	CGTCCTCATCTTGGATCTC	2010001E11Rik_CCDS48539.1_ex0_10:39922163-39922185:-_4-4	2010001E11Rik	8.84	11.3755	9.60436	0.777109	0.920416
1004	GTCAAGGTCGGACTCGGTG	2010001E11Rik_CCDS48539.1_ex0_10:39922027-39922049:+_4-3	2010001E11Rik	11.474	15.4637	10.9508	0.741997	1.04777
1007	GGGTTCCTTAAAAAAGCCT	2010002M12Rik_CCDS29765.1_ex0_19:34619386-34619408:-_5-2	2010002M12Rik	4.74957	3.39651	3.36456	1.39836	1.41165
1010	TGTGAGCCACACTTCCGCA	2010002M12Rik_CCDS29765.1_ex0_19:34619735-34619757:+_5-5	2010002M12Rik	20.9874	16.3659	17.6833	1.28238	1.18685
1008	TCTCTACAACCCTTAAAGA	2010002M12Rik_CCDS29765.1_ex0_19:34619596-34619618:-_5-3	2010002M12Rik	1.18593	1.14097	1.45978	1.0394	0.812405
1006	ATGAAAAAAGCTACAAGCA	2010002M12Rik_CCDS29765.1_ex0_19:34619296-34619318:-_5-1	2010002M12Rik	2.64237	2.60707	2.54353	1.01354	1.03886
1009	ATTACCATCATAGTAATCC	2010002M12Rik_CCDS29765.1_ex0_19:34619617-34619639:+_5-4	2010002M12Rik	1	1	1	1	1
1015	CTTCTCACGGCCCAGTCTG	2010003K11Rik_CCDS29429.1_ex1_19:4498387-4498409:+_5-5	2010003K11Rik	16.2152	14.646	15.8442	1.10714	1.02342
1012	TGATCCAAGGCCAGAGAGG	2010003K11Rik_CCDS29429.1_ex1_19:4498278-4498300:-_5-2	2010003K11Rik	8.03431	8.16135	7.14128	0.984434	1.12505
1014	CGTGAGAAGTCCAGGTCGC	2010003K11Rik_CCDS29429.1_ex1_19:4498375-4498397:-_5-4	2010003K11Rik	17.6097	18.2549	19.7194	0.964653	0.893011
1011	GTACTGTCTCAGCCACCGC	2010003K11Rik_CCDS29429.1_ex1_19:4498249-4498271:+_5-1	2010003K11Rik	13.8291	17.3245	14.7276	0.79824	0.938994
1013	TCGCAGGTCCCCGATGGCA	2010003K11Rik_CCDS29429.1_ex1_19:4498360-4498382:-_5-3	2010003K11Rik	10.9162	13.8848	12.4287	0.786199	0.878307
89900	TGTGAAGACTTTTATGTGG	2010005H15Rik_CCDS37330.1_ex2_16:36257270-36257292:-_1-1	2010005H15Rik	1	1	1	1	1
1017	AAAGGCTCGCGGAGCTCCG	2010012O05Rik_CCDS38011.1_ex0_19:46690064-46690086:+_5-2	2010012O05Rik	4.50166	3.42471	3.82433	1.31447	1.17711
1018	TTTTGTTTTCTAGCTGCTG	2010012O05Rik_CCDS38011.1_ex1_19:46699542-46699564:+_5-3	2010012O05Rik	34.5292	27.3053	32.2975	1.26456	1.0691
1016	GTAATCGCGCTCACCAAGC	2010012O05Rik_CCDS38011.1_ex0_19:46690037-46690059:+_5-1	2010012O05Rik	16.0602	14.4487	16.0084	1.11154	1.00324
1020	ACATCTTCCGAGTGTAAGA	2010012O05Rik_CCDS38011.1_ex1_19:46699599-46699621:-_5-5	2010012O05Rik	4.78055	4.89081	4.57968	0.977456	1.04386
1019	GGGCAGGCAGCTCGAAACA	2010012O05Rik_CCDS38011.1_ex1_19:46699561-46699583:+_5-4	2010012O05Rik	10.1415	10.4733	10.2283	0.968322	0.99151
1024	CTTCCGAAGATGAAACGCC	2010015L04Rik_CCDS51402.1_ex2_4:155418910-155418932:-_5-4	2010015L04Rik	26.1314	7.48469	10.4582	3.49131	2.49864
1022	CATCCTCTAGTCCCTCAGA	2010015L04Rik_CCDS51402.1_ex1_4:155418661-155418683:-_5-2	2010015L04Rik	18.8182	10.868	12.363	1.73152	1.52214
1025	CTCATGCATCTTGTCTAGA	2010015L04Rik_CCDS51402.1_ex2_4:155418940-155418962:-_5-5	2010015L04Rik	6.11305	6.66705	4.87525	0.916904	1.25389
1023	CAAGGGTGCCGAGAAAATG	2010015L04Rik_CCDS51402.1_ex2_4:155418864-155418886:+_5-3	2010015L04Rik	2.98324	3.25554	3.62729	0.916358	0.822445
1021	AGAGTCCAGTTGGAGGATC	2010015L04Rik_CCDS51402.1_ex1_4:155418621-155418643:+_5-1	2010015L04Rik	7.50751	9.93759	9.34163	0.755466	0.803662
1028	GTACCAGTAGTCTCCCCAT	2010106E10Rik_CCDS30360.1_ex2_X:112512410-112512432:-_5-3	2010106E10Rik	7.38356	5.05998	7.30549	1.45921	1.01069
1029	GGAGAAATGTGATCAACTC	2010106E10Rik_CCDS30360.1_ex2_X:112512436-112512458:+_5-4	2010106E10Rik	4.03684	3.17096	3.16751	1.27307	1.27445
1026	ATGCACAAACAATAGACTC	2010106E10Rik_CCDS30360.1_ex1_X:112497932-112497954:-_5-1	2010106E10Rik	1.99162	1.67666	1.7225	1.18785	1.15624
1027	TCCAAATTTCAGAGGCCAA	2010106E10Rik_CCDS30360.1_ex2_X:112512394-112512416:+_5-2	2010106E10Rik	11.536	10.4451	11.5748	1.10444	0.996643
1030	TGACTTCCCTTTACAGTAA	2010106E10Rik_CCDS30360.1_ex2_X:112512539-112512561:-_5-5	2010106E10Rik	3.07621	3.19915	3.33172	0.961569	0.92331
1032	CCTCATCGTATATAAAATC	2010107E04Rik_CCDS36566.1_ex2_12:111963237-111963259:-_3-2	2010107E04Rik	3.38609	2.24055	2.8391	1.51128	1.19266
1031	TAAAATCAGGAGTGCTGGT	2010107E04Rik_CCDS36566.1_ex2_12:111963225-111963247:-_3-1	2010107E04Rik	10.7303	11.0654	11.6733	0.969718	0.919212
1033	GGAAATTTGGGTAGGAGTG	2010107E04Rik_CCDS36566.1_ex2_12:111963267-111963289:-_3-3	2010107E04Rik	8.25123	9.57106	8.65197	0.862101	0.953682
1038	CATGATAGCGCCCTGCAGC	2010107G12Rik_CCDS19998.1_ex4_6:34957040-34957062:+_5-5	2010107G12Rik	15.2236	14.1385	16.4681	1.07674	0.924425
1036	TGGTCGGCGCGATGGTCAA	2010107G12Rik_CCDS19998.1_ex4_6:34956949-34956971:+_5-3	2010107G12Rik	14.077	13.2927	15.4172	1.059	0.913069
1035	TGCAGAATCAAAGAGAGGC	2010107G12Rik_CCDS19998.1_ex4_6:34956914-34956936:+_5-2	2010107G12Rik	5.02846	4.9472	5.959	1.01643	0.843843
1037	CCCACTAGCATCTGGACAC	2010107G12Rik_CCDS19998.1_ex4_6:34957011-34957033:+_5-4	2010107G12Rik	13.3953	13.3773	12.7571	1.00134	1.05002
1034	CATATGCCGTGGGGGACTC	2010107G12Rik_CCDS19998.1_ex2_6:34955041-34955063:+_5-1	2010107G12Rik	19.9957	21.3845	20.1135	0.935059	0.994145
1041	TCCTTTCAGTGACCTGAAC	2010107G23Rik_CCDS23886.1_ex0_10:62109013-62109035:-_5-3	2010107G23Rik	10.3584	8.27413	9.86709	1.25191	1.0498
1039	GGTCACAGGTTCCACCACG	2010107G23Rik_CCDS23886.1_ex0_10:62108949-62108971:+_5-1	2010107G23Rik	10.2035	8.27413	12.1003	1.23318	0.843243
1043	GGCCACGGCGCACCTCCAG	2010107G23Rik_CCDS23886.1_ex0_10:62109087-62109109:-_5-5	2010107G23Rik	13.3643	15.7174	15.0888	0.850284	0.885707
1040	TGGCACCTTGGGAACCACG	2010107G23Rik_CCDS23886.1_ex0_10:62108964-62108986:-_5-2	2010107G23Rik	3.8819	4.58067	4.44831	0.847451	0.872668
1042	GATTGGGCAGCACCCAGTC	2010107G23Rik_CCDS23886.1_ex0_10:62109034-62109056:+_5-4	2010107G23Rik	23.8073	39.0059	29.9001	0.610351	0.796226
1045	AGAGGCAGAAACGATTCCA	2010109A12Rik_CCDS57357.1_ex1_5:93208152-93208174:-_5-2	2010109A12Rik	2.64237	2.26874	3.06899	1.16469	0.860991
1046	CATTTCTTCAAGGAAGACT	2010109A12Rik_CCDS57357.1_ex1_5:93208173-93208195:+_5-3	2010109A12Rik	3.20016	2.86082	3.20035	1.11861	0.99994
1044	CACAACTATTGTGACACCG	2010109A12Rik_CCDS57357.1_ex1_5:93208135-93208157:+_5-1	2010109A12Rik	7.63147	7.11816	7.30549	1.07211	1.04462
1048	AAATAGCATCAGAGATATG	2010109A12Rik_CCDS57357.1_ex2_5:93213281-93213303:+_5-5	2010109A12Rik	1	1	1	1	1
1047	ATATCCAACATTATCTTCA	2010109A12Rik_CCDS57357.1_ex2_5:93213249-93213271:-_5-4	2010109A12Rik	1.61976	1.93041	1.7225	0.839077	0.940354
1051	AGATACTCACTATACCAGT	2010109I03Rik_CCDS27537.1_ex1_15:74880664-74880686:+_5-3	2010109I03Rik	1.68174	1.16917	1.39409	1.43841	1.20633
1049	ACATGATTAATGTCAGGGC	2010109I03Rik_CCDS27537.1_ex0_15:74879965-74879987:+_5-1	2010109I03Rik	11.5979	8.16135	10.6881	1.42108	1.08513
1053	CATGAATGCAGTGGTATAG	2010109I03Rik_CCDS27537.1_ex1_15:74880735-74880757:-_5-5	2010109I03Rik	5.80316	4.83442	5.7948	1.20038	1.00144
1050	CAGTCGTTTGCTGACCTGG	2010109I03Rik_CCDS27537.1_ex0_15:74880008-74880030:+_5-2	2010109I03Rik	31.2754	29.1097	26.8131	1.0744	1.16642
1052	GGTCAAGCAGTAGAGGCTC	2010109I03Rik_CCDS27537.1_ex1_15:74880684-74880706:+_5-4	2010109I03Rik	8.00332	8.24593	8.09367	0.970578	0.988837
1056	CAATTGGAGCTTACGGATC	2010111I01Rik_CCDS36699.1_ex0_13:63015834-63015856:+_5-3	2010111I01Rik	7.75542	6.46969	7.33833	1.19873	1.05684
1057	GGGATCCCCCATCAACAAC	2010111I01Rik_CCDS36699.1_ex1_13:63033040-63033062:+_5-4	2010111I01Rik	6.14403	5.20095	5.07229	1.18133	1.21129
1055	TGCTACACTCGTTGCAGCC	2010111I01Rik_CCDS36699.1_ex0_13:63015778-63015800:+_5-2	2010111I01Rik	12.5586	11.5165	12.9213	1.09049	0.971928
1054	AACCAGTCGCGTTCTACCC	2010111I01Rik_CCDS36699.1_ex0_13:63015328-63015350:+_5-1	2010111I01Rik	8.68506	8.9226	9.70288	0.973378	0.895101
1058	TCCGCTTCCGATGGCGAGA	2010111I01Rik_CCDS36699.1_ex2_13:63061167-63061189:-_5-5	2010111I01Rik	12.5586	17.5782	12.1331	0.714439	1.03507
1063	CATTGCCGTTGAGGAGTCG	2010300C02Rik_CCDS48242.1_ex7_1:37637890-37637912:-_5-5	2010300C02Rik	16.1842	12.6724	17.6504	1.27712	0.91693
1062	CACCCGCACGGGCCGAGCA	2010300C02Rik_CCDS48242.1_ex6_1:37631857-37631879:+_5-4	2010300C02Rik	30.8106	27.559	30.9182	1.11799	0.996519
1060	CTCATCTAGGGTCCACGAC	2010300C02Rik_CCDS48242.1_ex3_1:37626020-37626042:+_5-2	2010300C02Rik	12.2177	11.2909	12.5929	1.08208	0.970206
1061	TGGACCCACATCGTGCAGC	2010300C02Rik_CCDS48242.1_ex5_1:37631335-37631357:+_5-3	2010300C02Rik	16.8659	18.5932	17.5519	0.907101	0.960918
1059	TCCCGCTGCCTAGCGTCCG	2010300C02Rik_CCDS48242.1_ex3_1:37625952-37625974:+_5-1	2010300C02Rik	27.3399	37.1733	33.2499	0.735473	0.822255
1068	TCCTCTTAAAGCGCCGGGC	2200002D01Rik_CCDS52172.1_ex2_7:29248158-29248180:-_5-5	2200002D01Rik	14.108	11.0654	12.4615	1.27497	1.13212
1065	CTACTGCTGCTGGAGTCGG	2200002D01Rik_CCDS52172.1_ex1_7:29247927-29247949:+_5-2	2200002D01Rik	51.4487	49.5224	46.9118	1.0389	1.09671
1066	CCCCCATCTAGCGTGTCTC	2200002D01Rik_CCDS52172.1_ex1_7:29247955-29247977:-_5-3	2200002D01Rik	27.4019	28.6868	29.6046	0.95521	0.925597
1067	AGGCGCTGCTCACAAGCCG	2200002D01Rik_CCDS52172.1_ex2_7:29248128-29248150:-_5-4	2200002D01Rik	7.87937	11.009	8.98038	0.715723	0.877398
1064	GCAGCCAGCGGCATACTCC	2200002D01Rik_CCDS52172.1_ex0_7:29247716-29247738:+_5-1	2200002D01Rik	13.2403	18.7624	17.5191	0.705684	0.755767
1069	CAGAGGTAATCCTTCGCTG	2200002J24Rik_CCDS21107.1_ex0_7:30699892-30699914:-_5-1	2200002J24Rik	7.81739	6.89261	6.48446	1.13417	1.20556
1070	CAGGGCTGGAATCGCCAGC	2200002J24Rik_CCDS21107.1_ex0_7:30699944-30699966:-_5-2	2200002J24Rik	15.5644	14.5896	14.1693	1.06681	1.09846
1073	CTCCAATCTCCAACAGAGT	2200002J24Rik_CCDS21107.1_ex1_7:30700256-30700278:-_5-5	2200002J24Rik	11.2881	11.4601	11.1807	0.98499	1.0096
1072	AGTTGGCTTCCCGGGTCTG	2200002J24Rik_CCDS21107.1_ex1_7:30700240-30700262:-_5-4	2200002J24Rik	15.4095	17.2681	18.2416	0.892367	0.844746
1071	CTGCTGTTCTCCCTTAAGG	2200002J24Rik_CCDS21107.1_ex0_7:30699962-30699984:+_5-3	2200002J24Rik	17.7336	23.9783	21.6899	0.739567	0.817598
1076	GTTTGCATTATAGTTGGGG	2210010C04Rik_CCDS20043.1_ex2_6:41033089-41033111:+_5-3	2210010C04Rik	10.9782	8.10496	9.60436	1.3545	1.14304
1077	AGGCGCACCTGAATTCGGC	2210010C04Rik_CCDS20043.1_ex2_6:41033177-41033199:+_5-4	2210010C04Rik	12.7445	9.74023	12.2316	1.30844	1.04193
1074	GACACCTAGTACCAGCTGA	2210010C04Rik_CCDS20043.1_ex2_6:41032977-41032999:+_5-1	2210010C04Rik	12.7445	13.9412	12.3302	0.914163	1.0336
1078	TACGATTTGTAGCAGTGAG	2210010C04Rik_CCDS20043.1_ex3_6:41034240-41034262:+_5-5	2210010C04Rik	7.75542	8.69704	10.0313	0.891731	0.773122
1075	GACACTCGAGAGTTGAGGG	2210010C04Rik_CCDS20043.1_ex2_6:41033024-41033046:+_5-2	2210010C04Rik	12.3727	14.054	12.1003	0.880368	1.02251
1081	TCGAGCGCGCGGTTGACGG	2210016F16Rik_CCDS49282.1_ex3_13:58384828-58384850:+_5-3	2210016F16Rik	20.8634	16.3659	17.9788	1.27481	1.16044
1080	CTCACTGTGGCGTAGTAGG	2210016F16Rik_CCDS49282.1_ex2_13:58384369-58384391:+_5-2	2210016F16Rik	15.1926	11.9676	12.9213	1.26948	1.17578
1083	CACGAGCTCAACCCGCGCG	2210016F16Rik_CCDS49282.1_ex3_13:58384983-58385005:-_5-5	2210016F16Rik	12.8995	11.5729	14.5962	1.11463	0.883754
1082	ACGGCGGGACGCCCTACAC	2210016F16Rik_CCDS49282.1_ex3_13:58384868-58384890:-_5-4	2210016F16Rik	6.20601	7.03358	7.30549	0.88234	0.8495
1079	TATATCCCGCACCTGCTCG	2210016F16Rik_CCDS49282.1_ex2_13:58384347-58384369:+_5-1	2210016F16Rik	29.6021	38.8367	34.9577	0.762218	0.846797
1087	GACCCCGCAGCCAAGCCGC	2210016L21Rik_CCDS19576.1_ex1_5:114945807-114945829:+_5-4	2210016L21Rik	13.7981	9.62745	12.5601	1.4332	1.09857
1084	GAATTGGCACGCTGTCGCG	2210016L21Rik_CCDS19576.1_ex0_5:114942273-114942295:+_5-1	2210016L21Rik	18.1055	13.1799	16.501	1.37371	1.09724
1085	AGGCGGCTACGCCCGCCTG	2210016L21Rik_CCDS19576.1_ex0_5:114942292-114942314:+_5-2	2210016L21Rik	9.6457	7.99218	8.02799	1.20689	1.20151
1088	CTTCCTTCTTATGGCCTCC	2210016L21Rik_CCDS19576.1_ex4_5:114947189-114947211:-_5-5	2210016L21Rik	11.474	9.8812	11.1479	1.16119	1.02925
1086	GAGAGACCCGAAGCCGGTA	2210016L21Rik_CCDS19576.1_ex0_5:114942339-114942361:+_5-3	2210016L21Rik	5.80316	5.73664	6.38594	1.0116	0.908741
1093	AGCCACACGACCTAAGGAT	2210018M11Rik_CCDS40028.1_ex9_7:98619413-98619435:+_5-1	2210018M11Rik	7.91036	6.949	7.53537	1.13835	1.04976
1089	GCTTGTAGAACTTACCGGT	2210018M11Rik_CCDS40028.1_ex10_7:98621375-98621397:+_5-2	2210018M11Rik	7.75542	7.62566	7.10844	1.01702	1.09102
1091	GTTGTTATAACTGCGTCCC	2210018M11Rik_CCDS40028.1_ex12_7:98630257-98630279:-_5-4	2210018M11Rik	7.5385	8.07677	5.72911	0.933356	1.31582
1092	CTTCAGAGTGGTCCATCGA	2210018M11Rik_CCDS40028.1_ex14_7:98641627-98641649:-_5-5	2210018M11Rik	16.9589	19.8338	21.7884	0.855051	0.778345
1090	GACATGACCACGGACGGTG	2210018M11Rik_CCDS40028.1_ex12_7:98630144-98630166:+_5-3	2210018M11Rik	4.9355	6.63886	7.33833	0.743425	0.672564
1099	TAGGCTTGCAGAAGGATAC	2210404J11Rik_CCDS37451.1_ex12_17:15056776-15056798:+_6-1	2210404J11Rik	4.00585	2.15597	3.26603	1.85803	1.22652
1097	CTGCAAAGAGGCGGTGACC	2210404J11Rik_CCDS28410.1_ex2_17:15059889-15059911:-_6-5	2210404J11Rik	7.60048	5.96219	6.84571	1.27478	1.11025
1095	AAGTTCTAGTTGTGCTCCG	2210404J11Rik_CCDS28410.1_ex2_17:15059836-15059858:+_6-3	2210404J11Rik	15.9363	14.5333	13.5453	1.09654	1.17652
1096	TGCCAACGCGTATCTGACC	2210404J11Rik_CCDS28410.1_ex2_17:15059871-15059893:+_6-4	2210404J11Rik	14.6658	14.5896	14.4977	1.00522	1.01159
1098	CTAAGACACAGGCAATGGG	2210404J11Rik_CCDS28410.1_ex2_17:15059910-15059932:+_6-6	2210404J11Rik	10.9782	11.3473	13.0527	0.967471	0.841068
1094	GGAGTGCCTGTGCTATAAA	2210404J11Rik_CCDS28410.1_ex1_17:15059423-15059445:+_6-2	2210404J11Rik	9.67668	10.4451	11.7719	0.926434	0.822017
1100	AAGCCTTGGCTAGTAGGCC	2210404O07Rik_CCDS35998.1_ex1_10:81393800-81393822:+_5-1	2210404O07Rik	24.8299	12.0522	14.1036	2.0602	1.76054
1102	TTGGCGCACCAGACACGAT	2210404O07Rik_CCDS35998.1_ex1_10:81393868-81393890:-_5-4	2210404O07Rik	3.75795	2.71985	2.74058	1.38167	1.37122
1101	GAAGCCCACTACTGCAGCC	2210404O07Rik_CCDS35998.1_ex1_10:81393818-81393840:-_5-2	2210404O07Rik	14.6038	13.7156	14.9575	1.06476	0.976356
89500	GAGGATGAAGACTATAAAC	2210404O07Rik_CCDS35998.1_ex1_10:81393839-81393861:-_5-3	2210404O07Rik	1	1	1	1	1
1103	GAGGAGGCTACATTCAGAA	2210404O07Rik_CCDS35998.1_ex2_10:81394097-81394119:+_5-5	2210404O07Rik	3.63399	4.10137	3.49592	0.886043	1.0395
1106	TTGGATATTTACATGCTCG	2210404O09Rik_CCDS57051.1_ex0_17:21881011-21881033:+_4-4	2210404O09Rik	6.85676	7.28733	7.56821	0.940916	0.905995
1105	ACCTTCTAAAACTAACCTC	2210404O09Rik_CCDS57051.1_ex0_17:21880931-21880953:-_4-3	2210404O09Rik	1.83668	2.21235	1.91955	0.830193	0.956828
1104	AATGGTACAAAGCTTGATA	2210404O09Rik_CCDS57051.1_ex0_17:21880762-21880784:-_4-2	2210404O09Rik	1.99162	2.74805	2.08376	0.724741	0.955784
1111	TACAAGCTACGTGTGAAAA	2210407C18Rik_CCDS24736.1_ex3_11:58612591-58612613:-_5-5	2210407C18Rik	3.63399	2.63527	2.70774	1.37898	1.34208
1110	CAGCTATAAGAGGTTAGAC	2210407C18Rik_CCDS24736.1_ex3_11:58612545-58612567:+_5-4	2210407C18Rik	4.81154	3.90401	4.57968	1.23246	1.05063
1109	ACCTAGTACTTGAGCAAAA	2210407C18Rik_CCDS24736.1_ex2_11:58612101-58612123:-_5-3	2210407C18Rik	6.70182	6.30053	4.94093	1.06369	1.35639
1108	TATCAAAACCTATGTGCCT	2210407C18Rik_CCDS24736.1_ex2_11:58612069-58612091:-_5-2	2210407C18Rik	4.53265	6.21594	5.63059	0.729197	0.805004
1107	TGCTCACCGGTGCAGCACT	2210407C18Rik_CCDS24736.1_ex2_11:58612001-58612023:+_5-1	2210407C18Rik	17.7336	26.2339	23.1349	0.675981	0.766531
1113	TCGACGATTCTTAGTAAAC	2210408I21Rik_CCDS49316.1_ex2_13:77192756-77192778:+_5-2	2210408I21Rik	3.26214	2.38152	3.33172	1.36977	0.979116
1116	GCTGAAGTAATGCCACATC	2210408I21Rik_CCDS49316.1_ex8_13:77267685-77267707:-_5-5	2210408I21Rik	3.8819	3.17096	3.62729	1.2242	1.07019
1115	AGCAACGTATGTCTCTCAG	2210408I21Rik_CCDS49316.1_ex6_13:77262091-77262113:+_5-4	2210408I21Rik	8.71605	7.20274	8.32356	1.2101	1.04715
1114	GAATCATCTCGGCATGCCA	2210408I21Rik_CCDS49316.1_ex6_13:77261935-77261957:-_5-3	2210408I21Rik	8.43716	7.82302	8.84902	1.0785	0.953457
1112	ACAGAATGTATGGAAGTCC	2210408I21Rik_CCDS49316.1_ex2_13:77192678-77192700:-_5-1	2210408I21Rik	63.0073	71.8804	60.6722	0.876557	1.03849
1121	CTCAGGCAACCTTCACTAG	2300002M23Rik_CCDS50092.1_ex1_17:35568198-35568220:+_5-5	2300002M23Rik	11.8768	8.55607	11.0165	1.38812	1.07809
1118	TCAGCGAATCTCCACAAGA	2300002M23Rik_CCDS50092.1_ex1_17:35567980-35568002:+_5-2	2300002M23Rik	5.21439	5.20095	5.56491	1.00258	0.937012
1119	GCCTCTGGAAAGGTATGGC	2300002M23Rik_CCDS50092.1_ex1_17:35568147-35568169:-_5-3	2300002M23Rik	6.94973	7.31552	6.94423	0.949997	1.00079
1120	GGCTTCCTCTGCACGGCTC	2300002M23Rik_CCDS50092.1_ex1_17:35568182-35568204:+_5-4	2300002M23Rik	16.711	18.3113	19.0297	0.912606	0.878151
1117	ACTCATTATTCACAGGGTC	2300002M23Rik_CCDS50092.1_ex1_17:35567938-35567960:-_5-1	2300002M23Rik	5.52427	7.79482	6.68151	0.70871	0.8268
1122	TGACGAAGATGTGCTACAG	2300005B03Rik_CCDS37103.1_ex0_15:74743079-74743101:-_5-1	2300005B03Rik	11.1021	8.55607	9.17743	1.29757	1.20972
1125	GCTCCATGGGCAGCTAGAC	2300005B03Rik_CCDS37103.1_ex1_15:74743412-74743434:+_5-4	2300005B03Rik	13.3643	11.5165	14.1036	1.16045	0.94758
1124	GCAATGATGACACAGTGGG	2300005B03Rik_CCDS37103.1_ex1_15:74743389-74743411:+_5-3	2300005B03Rik	18.8802	19.2981	17.125	0.978344	1.10249
1123	AAAGCTGATGGGAGAACCT	2300005B03Rik_CCDS37103.1_ex0_15:74743116-74743138:+_5-2	2300005B03Rik	6.79478	7.31552	7.20696	0.928818	0.942808
1126	TCCTCCAAATCCCTTGCAC	2300005B03Rik_CCDS37103.1_ex1_15:74743442-74743464:+_5-5	2300005B03Rik	6.79478	9.99398	9.24311	0.679888	0.735119
1127	CGCTTCTTCACCGCGCTCA	2300009A05Rik_CCDS52830.1_ex1_9:63398888-63398910:-_5-1	2300009A05Rik	19.376	16.1685	17.9788	1.19838	1.07771
1130	CGGCCAATTGAAGTGCGAC	2300009A05Rik_CCDS52830.1_ex1_9:63399008-63399030:+_5-4	2300009A05Rik	9.67668	9.00718	7.6339	1.07433	1.26759
1129	GGTAGTTGGCGCCCAGCAC	2300009A05Rik_CCDS52830.1_ex1_9:63398989-63399011:+_5-3	2300009A05Rik	22.1959	21.2153	19.0954	1.04622	1.16237
1131	CGTTGTGGACCGCACTGTA	2300009A05Rik_CCDS52830.1_ex1_9:63399040-63399062:+_5-5	2300009A05Rik	10.8232	11.0372	11.0822	0.980618	0.976632
1128	ACTACCACGTCCTGCGCAC	2300009A05Rik_CCDS52830.1_ex1_9:63398974-63398996:-_5-2	2300009A05Rik	17.7026	18.3959	19.8508	0.962314	0.891785
1135	TACAAACTACTGAAGCCCC	2310002J15Rik_CCDS50526.1_ex0_2:25239305-25239327:-_5-4	2310002J15Rik	9.08791	6.949	6.15605	1.3078	1.47626
1133	CTGCAATCCCTATAGCAGT	2310002J15Rik_CCDS50526.1_ex0_2:25239217-25239239:-_5-2	2310002J15Rik	10.9782	9.54287	9.93277	1.15041	1.10525
1134	CTTGATACCTTTGGGCCCA	2310002J15Rik_CCDS50526.1_ex0_2:25239288-25239310:+_5-3	2310002J15Rik	18.0435	16.4223	20.0478	1.09872	0.900022
1132	CAGCATAAGTCAGTCCCGA	2310002J15Rik_CCDS50526.1_ex0_2:25239188-25239210:+_5-1	2310002J15Rik	20.7085	21.1307	17.8146	0.980017	1.16244
1136	CTGGGATACATGTTCCTGC	2310002J15Rik_CCDS50526.1_ex0_2:25239341-25239363:+_5-5	2310002J15Rik	15.6264	18.3959	19.3253	0.849452	0.808598
1139	GCATCCACTTTAGACAAGG	2310002L09Rik_CCDS18285.1_ex1_4:73943209-73943231:+_5-3	2310002L09Rik	11.2881	6.15956	8.22504	1.83261	1.3724
1138	GTTATACGCTAGTTCAGAG	2310002L09Rik_CCDS18285.1_ex1_4:73943091-73943113:+_5-2	2310002L09Rik	6.7638	5.11637	5.30218	1.32199	1.27566
1140	AGGTCATACCTCGAAATGC	2310002L09Rik_CCDS18285.1_ex2_4:73950572-73950594:-_5-4	2310002L09Rik	7.84838	6.4133	8.75049	1.22377	0.896907
1137	TTTCTAACACAAACCTAGA	2310002L09Rik_CCDS18285.1_ex1_4:73943006-73943028:+_5-1	2310002L09Rik	1.40285	1.5075	1.39409	0.93058	1.00628
1141	CTGCTGAAACACGGCTCCA	2310002L09Rik_CCDS18285.1_ex2_4:73950591-73950613:-_5-5	2310002L09Rik	9.1189	12.4469	9.76857	0.732625	0.933494
1144	AAGATCCTCCACCACCTAG	2310003H01Rik_CCDS49004.1_ex6_11:120377114-120377136:-_5-3	2310003H01Rik	4.84253	4.83442	6.64866	1.00168	0.728346
1146	TAGACGAACTCGCGTCCGG	2310003H01Rik_CCDS49004.1_ex8_11:120378572-120378594:+_5-5	2310003H01Rik	9.76965	9.85301	10.5239	0.99154	0.928329
1145	TGCCTGTCGTTGGACTCGC	2310003H01Rik_CCDS49004.1_ex7_11:120378332-120378354:-_5-4	2310003H01Rik	20.2127	21.5536	21.0659	0.937784	0.959497
1143	TGCGTGAGTATTGCCTCCC	2310003H01Rik_CCDS49004.1_ex6_11:120376918-120376940:-_5-2	2310003H01Rik	12.0008	15.0971	14.1693	0.794905	0.846959
1142	AGCCAGACGGGGCCATAGG	2310003H01Rik_CCDS49004.1_ex6_11:120376786-120376808:-_5-1	2310003H01Rik	3.32411	4.4679	4.57968	0.743999	0.72584
1149	CAACACATCATCATGTACG	2310005G13Rik_CCDS49875.1_ex3_16:57046997-57047019:-_5-3	2310005G13Rik	9.1189	7.08997	8.58629	1.28617	1.06203
1150	GCATTTCTTTATGCGGTGA	2310005G13Rik_CCDS49875.1_ex3_16:57047041-57047063:+_5-4	2310005G13Rik	8.40617	6.949	7.43685	1.2097	1.13034
1151	AATTGGGGGGTAATAAGGG	2310005G13Rik_CCDS49875.1_ex4_16:57049400-57049422:+_5-5	2310005G13Rik	2.5804	2.38152	2.18228	1.08351	1.18243
1147	CACTATCAGGCTTTTAGGG	2310005G13Rik_CCDS49875.1_ex2_16:57045339-57045361:+_5-1	2310005G13Rik	12.1867	12.6724	14.1364	0.961672	0.862079
1148	TACGTGGTCCTTGCAATGC	2310005G13Rik_CCDS49875.1_ex3_16:57046982-57047004:-_5-2	2310005G13Rik	19.1281	34.523	27.5356	0.554067	0.694667
1153	TGTACATTGCAAGCACCAC	2310007B03Rik_CCDS15185.1_ex4_1:93159614-93159636:-_5-2	2310007B03Rik	9.61471	8.16135	7.43685	1.17808	1.29285
1152	CGCTTCAACGTTGTGCCCG	2310007B03Rik_CCDS15185.1_ex3_1:93156106-93156128:-_5-1	2310007B03Rik	19.19	22.4277	24.4485	0.855642	0.784916
1155	TCGGAGGCTCTCCTGATCG	2310007B03Rik_CCDS15185.1_ex4_1:93159829-93159851:-_5-4	2310007B03Rik	11.412	13.4619	13.2169	0.847729	0.863443
1154	GACTTTACTGGGTACAAGG	2310007B03Rik_CCDS15185.1_ex4_1:93159670-93159692:+_5-3	2310007B03Rik	12.2797	16.0558	13.0198	0.764816	0.943153
1156	GTTGACTATTCTAGAGACC	2310007B03Rik_CCDS15185.1_ex4_1:93159919-93159941:-_5-5	2310007B03Rik	8.46815	11.8266	9.11175	0.716025	0.929366
1158	CCTCAGCATAACCGGGTCA	2310007L24Rik_CCDS48962.1_ex1_11:106375223-106375245:+_5-2	2310007L24Rik	15.1926	12.3341	14.7604	1.23175	1.02928
1160	TTTCACCTACCGGTGGGCT	2310007L24Rik_CCDS48962.1_ex2_11:106375504-106375526:-_5-4	2310007L24Rik	8.15826	7.11816	9.21027	1.14612	0.885779
1157	ATGGGACTGTCCAAGGGAA	2310007L24Rik_CCDS48962.1_ex1_11:106375194-106375216:-_5-1	2310007L24Rik	4.9355	5.28553	4.64536	0.933775	1.06246
1159	ACTGTTACCTTCCTTGACC	2310007L24Rik_CCDS48962.1_ex1_11:106375235-106375257:-_5-3	2310007L24Rik	10.5753	12.1649	11.0822	0.869329	0.954263
1161	CTCCTCGTGACTGTCGGTG	2310007L24Rik_CCDS48962.1_ex3_11:106376256-106376278:-_5-5	2310007L24Rik	27.3399	37.0323	32.626	0.738273	0.837981
1162	GAACCACATAGCCGGTAGC	2310009B15Rik_CCDS35727.1_ex1_1:138853626-138853648:+_5-1	2310009B15Rik	8.40617	7.00538	7.6339	1.19996	1.10116
1165	ACTCGTGGGGAACGCCCGA	2310009B15Rik_CCDS35727.1_ex2_1:138856660-138856682:-_5-4	2310009B15Rik	20.1507	18.706	16.4025	1.07723	1.22852
1164	CAGTTAACTCTCGGCTCGC	2310009B15Rik_CCDS35727.1_ex2_1:138856624-138856646:+_5-3	2310009B15Rik	10.3274	10.1349	8.84902	1.01899	1.16707
1163	GCACATCGTCGAGCTGCAC	2310009B15Rik_CCDS35727.1_ex2_1:138856593-138856615:-_5-2	2310009B15Rik	9.1189	9.4019	10.5896	0.9699	0.861119
1166	CCCTCGGTTCGACTTCCGA	2310009B15Rik_CCDS35727.1_ex2_1:138856705-138856727:-_5-5	2310009B15Rik	20.4915	31.1397	27.9625	0.658052	0.732822
1169	CTCCTACCTTCCGGGGCCA	2310011J03Rik_CCDS24017.1_ex1_10:80320175-80320197:+_5-3	2310011J03Rik	19.221	13.8284	13.184	1.38997	1.4579
1170	GATCCTGTTTTCACTGCCC	2310011J03Rik_CCDS24017.1_ex1_10:80320192-80320214:-_5-4	2310011J03Rik	12.1867	9.45829	9.73573	1.28847	1.25175
1171	GATCCTGGAGGACGTGCGA	2310011J03Rik_CCDS24017.1_ex1_10:80320226-80320248:-_5-5	2310011J03Rik	17.1138	13.8566	14.6947	1.23507	1.16462
1167	CTCTCATTCATAGCCACGT	2310011J03Rik_CCDS24017.1_ex0_10:80319453-80319475:+_5-1	2310011J03Rik	34.2503	31.76	27.9625	1.07841	1.22486
1168	CCTTGGGGATGGGTCTGGG	2310011J03Rik_CCDS24017.1_ex0_10:80319524-80319546:+_5-2	2310011J03Rik	12.6206	22.907	16.4025	0.550949	0.769431
1172	GCTTGAAAATGCCGTCGAA	2310014L17Rik_CCDS20818.1_ex0_7:12928100-12928122:-_5-1	2310014L17Rik	3.63399	2.77624	3.69297	1.30896	0.984031
1175	TGTGCGCTTTGACCGACGC	2310014L17Rik_CCDS20818.1_ex0_7:12928329-12928351:+_5-4	2310014L17Rik	16.2462	15.802	16.8622	1.02811	0.963465
1173	TGTGGGCGCGCGGCACATG	2310014L17Rik_CCDS20818.1_ex0_7:12928216-12928238:-_5-2	2310014L17Rik	16.1842	18.0857	18.2416	0.89486	0.887215
1176	TCTTTCGCGGCCCGGGAGA	2310014L17Rik_CCDS20818.1_ex0_7:12928379-12928401:-_5-5	2310014L17Rik	25.5426	30.4348	34.1695	0.839256	0.747527
1174	GCATCGCGAGGCAGCAAAC	2310014L17Rik_CCDS20818.1_ex0_7:12928281-12928303:-_5-3	2310014L17Rik	7.97233	13.039	8.32356	0.611424	0.957804
1177	AACTGGATCCACTCGGAAG	2310022A10Rik_CCDS21026.1_ex2_7:27564486-27564508:-_5-1	2310022A10Rik	10.0795	5.76483	7.56821	1.74845	1.33182
1178	GAGCTGGGTGTGACCGTCG	2310022A10Rik_CCDS21026.1_ex3_7:27564705-27564727:+_5-2	2310022A10Rik	22.3508	20.4259	20.3106	1.09424	1.10045
1180	CTGTTGTCTGACCGCCGTG	2310022A10Rik_CCDS21026.1_ex5_7:27571618-27571640:-_5-4	2310022A10Rik	48.5358	52.2008	55.0236	0.92979	0.882092
1179	GCCAAGGTGGTACACCGCC	2310022A10Rik_CCDS21026.1_ex3_7:27564753-27564775:+_5-3	2310022A10Rik	5.80316	6.4133	5.36786	0.904863	1.08109
1181	CGGCGGGTCACGGCTGAGA	2310022A10Rik_CCDS21026.1_ex6_7:27574637-27574659:+_5-5	2310022A10Rik	16.804	22.4559	18.3729	0.748311	0.914604
1184	GAAATCATCGACCGCTGCC	2310022B05Rik_CCDS22773.1_ex3_8:124662961-124662983:-_5-3	2310022B05Rik	13.7051	11.3755	14.4648	1.20479	0.94748
1186	GAGAAGTACGGGCCCGAGT	2310022B05Rik_CCDS22773.1_ex3_8:124663009-124663031:-_5-5	2310022B05Rik	6.45392	6.27233	6.68151	1.02895	0.965937
1185	TTTCGTCCTGCTGCGCGGG	2310022B05Rik_CCDS22773.1_ex3_8:124662978-124663000:+_5-4	2310022B05Rik	6.29897	6.4415	6.71435	0.977874	0.938137
1183	TCCCGCACGTCCCCCGCAT	2310022B05Rik_CCDS22773.1_ex3_8:124662911-124662933:+_5-2	2310022B05Rik	32.267	33.5644	32.7245	0.961347	0.986022
1182	ACTTGGCAAGATGAACACT	2310022B05Rik_CCDS22773.1_ex2_8:124651394-124651416:-_5-1	2310022B05Rik	2.76632	3.22735	3.75865	0.857151	0.735989
1187	TACAACACTTGCTCATACG	2310030G06Rik_CCDS23170.1_ex0_9:50740708-50740730:+_5-1	2310030G06Rik	3.81992	2.01499	3.46308	1.89575	1.10304
1188	GCTGTTGTCTCATAGTCCT	2310030G06Rik_CCDS23170.1_ex0_9:50740732-50740754:+_5-2	2310030G06Rik	11.412	7.96399	11.1151	1.43295	1.02672
1189	CTGTGGCAGAATGGCACAA	2310030G06Rik_CCDS23170.1_ex1_9:50741295-50741317:-_5-3	2310030G06Rik	3.54103	2.74805	3.06899	1.28856	1.15381
1191	TCCAGAAGAAAAGCAAAAC	2310030G06Rik_CCDS23170.1_ex2_9:50742260-50742282:-_5-5	2310030G06Rik	2.48743	2.29694	2.51069	1.08293	0.990736
1190	GCTCAATGTGGGTCTTGGG	2310030G06Rik_CCDS23170.1_ex1_9:50741334-50741356:+_5-4	2310030G06Rik	26.3173	32.2957	27.1415	0.814887	0.969634
1193	CGCGTACCAGGTGAGGTCG	2310033P09Rik_CCDS24764.1_ex0_11:59208563-59208585:-_5-2	2310033P09Rik	17.1758	12.2495	14.3992	1.40216	1.19283
1194	TGTACCGGCCCGAGCCGTG	2310033P09Rik_CCDS24764.1_ex0_11:59208599-59208621:+_5-3	2310033P09Rik	29.757	21.9484	24.2843	1.35577	1.22536
1192	ACTCGCTGATGGCGCCAGT	2310033P09Rik_CCDS24764.1_ex0_11:59208525-59208547:+_5-1	2310033P09Rik	17.6097	14.5051	14.7933	1.21403	1.19038
1196	CCCACCGGCCTGAGCAAGG	2310033P09Rik_CCDS24764.1_ex1_11:59208844-59208866:+_5-5	2310033P09Rik	13.7671	14.5615	15.2202	0.94545	0.90453
1195	CAGTGGTTACAAGAACGTG	2310033P09Rik_CCDS24764.1_ex1_11:59208816-59208838:+_5-4	2310033P09Rik	7.35257	8.58426	8.94754	0.856517	0.821742
1201	GATAGTCGGTTAGGATCAG	2310035C23Rik_CCDS15206.1_ex8_1:105695482-105695504:+_5-5	2310035C23Rik	12.3107	8.78162	10.2283	1.40187	1.20358
1199	AACCGAGTACGACGTCGGG	2310035C23Rik_CCDS15206.1_ex0_1:105664600-105664622:+_5-3	2310035C23Rik	12.0008	9.96578	11.7719	1.2042	1.01945
1197	CATCGATTGACAATCGGGC	2310035C23Rik_CCDS15206.1_ex0_1:105664372-105664394:-_5-1	2310035C23Rik	23.7763	22.907	17.7161	1.03795	1.34207
1200	CCTATTGGGCTGATCGAAA	2310035C23Rik_CCDS15206.1_ex7_1:105693157-105693179:-_5-4	2310035C23Rik	7.5385	8.80982	9.37447	0.855693	0.804152
1198	AGAAGTAATCGCGCAGTCG	2310035C23Rik_CCDS15206.1_ex0_1:105664480-105664502:-_5-2	2310035C23Rik	4.96648	6.01858	5.959	0.825191	0.833442
1205	TCCTTACGAAGCTGAGCGT	2310036O22Rik_CCDS22490.1_ex0_8:85027220-85027242:-_5-5	2310036O22Rik	9.80064	6.35692	8.52061	1.54173	1.15023
1202	CGATGGGCTGAGTCGGGAC	2310036O22Rik_CCDS22490.1_ex0_8:85026970-85026992:+_5-1	2310036O22Rik	11.5979	8.52788	10.4911	1.36	1.10551
89602	CGGGAACGTCACCCGAGAG	2310036O22Rik_CCDS22490.1_ex0_8:85026989-85027011:+_5-2	2310036O22Rik	1	1	1	1	1
1204	CCGGTGGATCGGGTCGCTG	2310036O22Rik_CCDS22490.1_ex0_8:85027148-85027170:-_5-4	2310036O22Rik	18.8802	22.4277	17.1906	0.841825	1.09828
1203	GCTCGAGTCCGGTGTCCAG	2310036O22Rik_CCDS22490.1_ex0_8:85027028-85027050:+_5-3	2310036O22Rik	7.75542	9.65565	10.2612	0.8032	0.755802
1209	GACGCGGTGGGTTCACCGT	2310039H08Rik_CCDS28841.1_ex0_17:46772979-46773001:-_5-4	2310039H08Rik	16.587	19.0162	16.2711	0.872261	1.01942
1207	GCCCTTCTGTACCAGGTGC	2310039H08Rik_CCDS28841.1_ex0_17:46772917-46772939:-_5-2	2310039H08Rik	13.953	16.5632	16.698	0.84241	0.83561
1208	ACCGTGGGTCGCAGTGATG	2310039H08Rik_CCDS28841.1_ex0_17:46772965-46772987:-_5-3	2310039H08Rik	9.80064	12.1931	10.3925	0.803783	0.943045
1210	CGAGGGAGCAGAGACGCGG	2310039H08Rik_CCDS28841.1_ex0_17:46772991-46773013:-_5-5	2310039H08Rik	9.76965	12.5879	13.7423	0.776117	0.710916
1206	CCTGCCTCGGTGACCCTGG	2310039H08Rik_CCDS28841.1_ex0_17:46772890-46772912:+_5-1	2310039H08Rik	11.536	15.1535	13.184	0.761273	0.874995
1211	CAAGTTGCCGGCCCTGGAA	2310042D19Rik_CCDS51406.1_ex0_4:156217380-156217402:-_5-1	2310042D19Rik	17.8885	14.5333	16.1069	1.23087	1.11061
1215	CCCGCCTCTAGGTCGCAAC	2310042D19Rik_CCDS51406.1_ex0_4:156218164-156218186:+_5-5	2310042D19Rik	14.5108	12.7288	12.9213	1.14	1.12302
1214	ACGAAGCTATGTCAGACTG	2310042D19Rik_CCDS51406.1_ex0_4:156217934-156217956:-_5-4	2310042D19Rik	10.2655	9.34551	10.2283	1.09844	1.00363
1212	CACGCCTCTTCTTACGACC	2310042D19Rik_CCDS51406.1_ex0_4:156217538-156217560:-_5-2	2310042D19Rik	7.56949	7.20274	8.15935	1.05092	0.927707
1213	TCCAAGCCTCAACCCGACG	2310042D19Rik_CCDS51406.1_ex0_4:156217888-156217910:+_5-3	2310042D19Rik	14.3249	15.3509	13.4468	0.933164	1.0653
1220	GTATCGAAGAAACTCTGCA	2310044G17Rik_CCDS56849.1_ex2_12:86962016-86962038:+_5-5	2310044G17Rik	4.22277	2.09958	2.87194	2.01125	1.47035
1218	GTCGTCATGAAGAGCGTGC	2310044G17Rik_CCDS56849.1_ex1_12:86960411-86960433:+_5-3	2310044G17Rik	13.2403	10.5297	12.1331	1.25743	1.09125
1217	GACCATAGGGGGCAGCGTG	2310044G17Rik_CCDS56849.1_ex1_12:86960393-86960415:-_5-2	2310044G17Rik	17.7026	19.5236	18.6685	0.906727	0.948261
1216	CTAGCGCGACCACTTGGCG	2310044G17Rik_CCDS56849.1_ex0_12:86952873-86952895:+_5-1	2310044G17Rik	25.8835	28.6586	28.9478	0.903167	0.894145
1219	CCAAAATAGCCCCCCACCC	2310044G17Rik_CCDS56849.1_ex2_12:86961954-86961976:+_5-4	2310044G17Rik	13.7981	15.4637	17.3549	0.892292	0.795058
1222	ATGTTCCTGTAGCCGGTAC	2310045N01Rik_CCDS52568.1_ex1_8:70141919-70141941:-_5-2	2310045N01Rik	23.8383	20.9052	24.9411	1.14031	0.955781
1223	CAGGCTGACATGCAGAGAT	2310045N01Rik_CCDS52568.1_ex2_8:70142470-70142492:+_5-3	2310045N01Rik	8.62309	7.65385	9.04606	1.12663	0.953242
1225	CACCTGCAGGCGTACTCCA	2310045N01Rik_CCDS52568.1_ex2_8:70142520-70142542:-_5-5	2310045N01Rik	9.14988	9.8812	9.17743	0.925989	0.996999
1221	CTTGCCAACGAGCCGTCAG	2310045N01Rik_CCDS52568.1_ex1_8:70141895-70141917:+_5-1	2310045N01Rik	9.6457	10.7552	10.721	0.896838	0.899705
1224	CAGGGCGCCATATACACCG	2310045N01Rik_CCDS52568.1_ex2_8:70142503-70142525:+_5-4	2310045N01Rik	9.52174	10.7834	10.6553	0.882999	0.893618
1226	TCAGTCCGGACGCTGTCCG	2310047M10Rik_CCDS36190.1_ex0_11:69059908-69059930:+_5-1	2310047M10Rik	4.43969	3.28374	4.34979	1.35202	1.02067
1229	CGACGGCAGACCCTCAGAG	2310047M10Rik_CCDS36190.1_ex0_11:69060159-69060181:-_5-4	2310047M10Rik	8.3132	7.4283	8.38924	1.11913	0.990936
1228	GGCCCCTGACGGCGTCGCC	2310047M10Rik_CCDS36190.1_ex0_11:69060049-69060071:-_5-3	2310047M10Rik	26.2244	26.0647	27.9297	1.00612	0.938942
1230	CATTCATCTCGACGCCTCC	2310047M10Rik_CCDS36190.1_ex0_11:69060188-69060210:-_5-5	2310047M10Rik	7.47652	9.06357	6.78003	0.824899	1.10273
1227	ATCGCCCATGGGCCGGAGC	2310047M10Rik_CCDS36190.1_ex0_11:69060001-69060023:+_5-2	2310047M10Rik	14.7897	20.4823	17.4205	0.722075	0.848982
1232	CATTTCACGTATGTCTGGC	2310050C09Rik_CCDS50977.1_ex0_3:92869099-92869121:+_5-2	2310050C09Rik	19.438	14.8716	17.3877	1.30705	1.11791
1233	GGAGTTGGGCATTTCACGT	2310050C09Rik_CCDS50977.1_ex0_3:92869120-92869142:+_5-3	2310050C09Rik	25.4497	22.2867	23.9888	1.14192	1.0609
1234	TTTGGTCTGACACGGAACT	2310050C09Rik_CCDS50977.1_ex0_3:92869143-92869165:+_5-4	2310050C09Rik	9.1189	9.31732	8.98038	0.978704	1.01542
1235	ATCTCACGTAAGTTTGAGC	2310050C09Rik_CCDS50977.1_ex0_3:92869166-92869188:+_5-5	2310050C09Rik	11.5979	12.1931	12.6914	0.951187	0.913842
1231	GGTCGTCTGACACGGAGCT	2310050C09Rik_CCDS50977.1_ex0_3:92868945-92868967:+_5-1	2310050C09Rik	11.1021	13.3773	13.0527	0.829924	0.850564
1239	GGGTATACACTGACAGAAT	2310057J18Rik_CCDS23759.1_ex5_10:28986108-28986130:-_5-4	2310057J18Rik	10.4204	7.4001	10.3269	1.40814	1.00906
1238	TTGGCTGGCAGTATCAATC	2310057J18Rik_CCDS23759.1_ex5_10:28985991-28986013:-_5-3	2310057J18Rik	5.80316	4.74984	4.97377	1.22176	1.16675
1240	TGACTACATGATGGAGGAT	2310057J18Rik_CCDS23759.1_ex5_10:28986149-28986171:-_5-5	2310057J18Rik	15.3785	12.8698	13.2497	1.19493	1.16067
1237	CACAGTCTGTCATTCCAGT	2310057J18Rik_CCDS23759.1_ex4_10:28983978-28984000:+_5-2	2310057J18Rik	9.18087	8.49968	8.58629	1.08014	1.06925
1236	TCATCTGATCCTTGGGTGG	2310057J18Rik_CCDS23759.1_ex3_10:28982494-28982516:+_5-1	2310057J18Rik	12.2797	13.5747	13.7752	0.904604	0.891436
1245	TTTCAGACTAACCGGATCC	2310057M21Rik_CCDS40159.1_ex4_7:131361914-131361936:+_5-5	2310057M21Rik	5.92712	4.32693	4.6782	1.36982	1.26697
1243	CAGGCAGTCTTGCCTCGAC	2310057M21Rik_CCDS40159.1_ex4_7:131361750-131361772:+_5-3	2310057M21Rik	9.08791	7.03358	7.76526	1.29207	1.17033
1242	TGCGCTCCAGGCGATAACC	2310057M21Rik_CCDS40159.1_ex2_7:131357493-131357515:+_5-2	2310057M21Rik	4.25376	3.84762	5.53207	1.10555	0.768927
1244	ACTCAGAACGCCAACCGAA	2310057M21Rik_CCDS40159.1_ex4_7:131361818-131361840:+_5-4	2310057M21Rik	5.40032	7.06177	8.38924	0.764726	0.643719
1241	ATGATTAGGTTTCAGCAGC	2310057M21Rik_CCDS40159.1_ex2_7:131357459-131357481:-_5-1	2310057M21Rik	6.85676	10.3887	9.89993	0.660021	0.692607
1246	AGGACCTCTGGCAGCGGAT	2310057N15Rik_CCDS28302.1_ex0_16:88773852-88773874:+_2-1	2310057N15Rik	14.2319	12.4469	14.7933	1.14341	0.962056
1247	GCTGGTAGTGGTGTAGACC	2310057N15Rik_CCDS28302.1_ex0_16:88774030-88774052:+_2-2	2310057N15Rik	6.45392	7.9358	6.91139	0.813266	0.933808
1249	GCAAGGCGGTCCCTCAAAA	2310061I04Rik_CCDS50095.1_ex4_17:35895796-35895818:+_5-2	2310061I04Rik	4.6566	2.88902	3.75865	1.61183	1.2389
1252	TCTACCATTCCCCCCGCTC	2310061I04Rik_CCDS50095.1_ex4_17:35896031-35896053:-_5-5	2310061I04Rik	13.5502	10.2759	10.721	1.31864	1.2639
1248	TGATACCTTTCCAAGCCCC	2310061I04Rik_CCDS50095.1_ex4_17:35895759-35895781:-_5-1	2310061I04Rik	13.5812	12.1649	11.9689	1.11642	1.1347
1250	AGGGTGGTAGTGACCGGTG	2310061I04Rik_CCDS50095.1_ex4_17:35895972-35895994:+_5-3	2310061I04Rik	6.08206	6.38511	5.69627	0.952538	1.06773
1251	GAAGTCGGTGGAGTGGAGT	2310061I04Rik_CCDS50095.1_ex4_17:35896007-35896029:+_5-4	2310061I04Rik	12.0008	13.6028	10.5896	0.882227	1.13326
1255	TGATAGCCGTGACGGAAAG	2310061N02Rik_CCDS49893.1_ex0_16:88707740-88707762:+_5-3	2310061N02Rik	4.25376	3.79123	4.18558	1.122	1.01629
1256	TCTCCCAGAAACCGCCATC	2310061N02Rik_CCDS49893.1_ex0_16:88707766-88707788:-_5-4	2310061N02Rik	13.6742	12.6442	13.9722	1.08145	0.978667
1254	GACACACTTGGACGGTAGC	2310061N02Rik_CCDS49893.1_ex0_16:88707653-88707675:+_5-2	2310061N02Rik	13.984	13.4337	16.2383	1.04097	0.861178
1257	TTCTGTGGGTCAGTTGGCG	2310061N02Rik_CCDS49893.1_ex0_16:88707798-88707820:+_5-5	2310061N02Rik	29.1372	29.589	26.7146	0.984732	1.09069
1253	TCTCCTTGACCCATAGACC	2310061N02Rik_CCDS49893.1_ex0_16:88707562-88707584:+_5-1	2310061N02Rik	6.67083	7.68205	8.55345	0.868367	0.7799
1259	GCGCTCCTGCTCGTTGGAA	2310067B10Rik_CCDS25646.1_ex12_11:115791017-115791039:-_5-4	2310067B10Rik	15.0376	11.8548	14.3992	1.26848	1.04434
1258	CTTGGGCTCCGTTACGGTG	2310067B10Rik_CCDS25646.1_ex10_11:115790013-115790035:+_5-3	2310067B10Rik	15.7194	15.7456	16.5995	0.998334	0.946978
1262	CTTCACTATGCCGTGCCGG	2310067B10Rik_CCDS25646.1_ex6_11:115788738-115788760:+_5-2	2310067B10Rik	20.6465	22.3995	23.5618	0.92174	0.876269
1261	CCGGTCTTGCCGCCCGATG	2310067B10Rik_CCDS25646.1_ex3_11:115786236-115786258:-_5-1	2310067B10Rik	38.9915	46.5902	47.9956	0.836904	0.812397
1260	CGCCGCTTGGTGACACAGG	2310067B10Rik_CCDS25646.1_ex14_11:115792419-115792441:-_5-5	2310067B10Rik	11.2571	14.5615	14.1036	0.773074	0.798171
1263	GGCCAAAGCTGGAATGGCG	2310079G19Rik_CCDS49891.1_ex0_16:88627270-88627292:+_5-1	2310079G19Rik	16.773	12.8134	12.6914	1.30902	1.3216
1264	TCCGGGATATCTGGATCCC	2310079G19Rik_CCDS49891.1_ex0_16:88627319-88627341:-_5-2	2310079G19Rik	15.6884	12.5879	12.6914	1.24631	1.23614
1265	AATCGGAGAGCAGACTGAA	2310079G19Rik_CCDS49891.1_ex0_16:88627343-88627365:+_5-3	2310079G19Rik	9.1189	8.02038	8.06083	1.13697	1.13126
1267	GTCTGCTCCACTGAGACAA	2310079G19Rik_CCDS49891.1_ex0_16:88627490-88627512:-_5-5	2310079G19Rik	16.9899	17.1271	15.1873	0.991987	1.11869
1266	ACGTGGTGTGTTGCTGCCC	2310079G19Rik_CCDS49891.1_ex0_16:88627436-88627458:+_5-4	2310079G19Rik	39.8901	47.2104	36.6982	0.844943	1.08698
1271	TCGGTGGCCTCAAAATGCA	2410002F23Rik_CCDS52228.1_ex0_7:44250977-44250999:-_5-4	2410002F23Rik	14.3559	12.2495	13.3482	1.17196	1.07549
1270	GATTCCCAACGCTGACGCC	2410002F23Rik_CCDS52228.1_ex0_7:44250953-44250975:-_5-3	2410002F23Rik	11.2261	9.93759	11.1151	1.12966	1.00999
1272	ATCCAGTTGGTGCGTGAGC	2410002F23Rik_CCDS52228.1_ex0_7:44251035-44251057:+_5-5	2410002F23Rik	6.7638	6.63886	6.97708	1.01882	0.969432
1269	TTGCAGCGGTAGTTAAAGA	2410002F23Rik_CCDS52228.1_ex0_7:44250881-44250903:-_5-2	2410002F23Rik	2.45644	2.4943	3.46308	0.984824	0.709323
1268	TCATACACCCGCAGGATCC	2410002F23Rik_CCDS52228.1_ex0_7:44250791-44250813:-_5-1	2410002F23Rik	11.2261	12.4187	12.5929	0.903968	0.891462
1273	CGGCCTCGGCTCCGACGAC	2410004B18Rik_CCDS17898.1_ex0_3:145938167-145938189:+_5-2	2410004B18Rik	24.3651	19.6646	21.5257	1.23903	1.13191
1276	TAGTGTAGGTCTCTGGGGG	2410004B18Rik_CCDS17898.1_ex1_3:145938937-145938959:-_5-5	2410004B18Rik	19.314	17.8038	21.0659	1.08482	0.916837
1274	CGGAACAGCTCGTCCGGGC	2410004B18Rik_CCDS17898.1_ex0_3:145938222-145938244:-_5-3	2410004B18Rik	29.3851	28.9687	34.3665	1.01437	0.855051
89673	CCGGAAGACGCGGGTCGCA	2410004B18Rik_CCDS17898.1_ex0_3:145938142-145938164:+_5-1	2410004B18Rik	1	1	1	1	1
1275	CTTACTCGACAGCCTCCAA	2410004B18Rik_CCDS17898.1_ex1_3:145938885-145938907:+_5-4	2410004B18Rik	36.0166	44.4192	37.782	0.810834	0.953274
1277	GGGGTGCTGTCTTACCAGA	2410004P03Rik_CCDS49033.1_ex1_12:17008257-17008279:+_5-1	2410004P03Rik	10.2345	7.25913	7.96231	1.40988	1.28536
1279	GGACACTCACCAACGCCTC	2410004P03Rik_CCDS49033.1_ex2_12:17011117-17011139:+_5-3	2410004P03Rik	5.86514	4.55248	5.89332	1.28834	0.995218
1281	TGTGCAACAGGACCAGCTG	2410004P03Rik_CCDS49033.1_ex2_12:17011169-17011191:-_5-5	2410004P03Rik	13.3953	12.4469	12.4287	1.07619	1.07777
1280	TTGTGGAAGCCGAAGCACG	2410004P03Rik_CCDS49033.1_ex2_12:17011140-17011162:-_5-4	2410004P03Rik	15.2855	15.8302	15.4501	0.965594	0.989351
1278	CTGAAAGACTATGACCCTC	2410004P03Rik_CCDS49033.1_ex1_12:17008272-17008294:-_5-2	2410004P03Rik	10.7923	11.3755	11.9032	0.948728	0.906666
1285	CTTGGAATTTCTGGAGCAC	2410012M07Rik_CCDS52896.1_ex0_9:98865452-98865474:+_5-4	2410012M07Rik	24.52	18.4805	22.3467	1.32681	1.09725
1284	CCACCCATTTTGGACAGCC	2410012M07Rik_CCDS52896.1_ex0_9:98865304-98865326:+_5-3	2410012M07Rik	38.0618	32.9441	32.3632	1.15534	1.17608
1282	TCGGCGGGCGCTTCCAACT	2410012M07Rik_CCDS52896.1_ex0_9:98865128-98865150:-_5-1	2410012M07Rik	15.7504	13.9976	17.5191	1.12522	0.899042
1286	ATTGGCCTGATCATCTGGA	2410012M07Rik_CCDS52896.1_ex0_9:98865480-98865502:-_5-5	2410012M07Rik	13.7671	13.6874	16.6652	1.00582	0.8261
1283	GGAGTCTTGGAGCCCCTCG	2410012M07Rik_CCDS52896.1_ex0_9:98865285-98865307:-_5-2	2410012M07Rik	18.3224	22.4277	20.9674	0.816955	0.873852
1291	CAGCCTCACTCTTGTCACT	2410015M20Rik_CCDS28908.1_ex2_17:56608934-56608956:+_5-5	2410015M20Rik	14.17	10.8398	16.3039	1.30722	0.869113
1287	GCACACATATTGGCTGAAC	2410015M20Rik_CCDS28908.1_ex2_17:56608872-56608894:+_5-1	2410015M20Rik	7.44554	8.4151	9.93277	0.884783	0.749593
1290	ACCTCCTCGGCCTTCCGCA	2410015M20Rik_CCDS28908.1_ex2_17:56608912-56608934:+_5-4	2410015M20Rik	38.2478	45.6598	41.7558	0.837669	0.915987
1288	TGAACTGGTACATTGCTGG	2410015M20Rik_CCDS28908.1_ex2_17:56608886-56608908:+_5-2	2410015M20Rik	14.9757	19.1571	17.8146	0.781728	0.840638
1289	GCTGGTGGCACAACCTCCT	2410015M20Rik_CCDS28908.1_ex2_17:56608900-56608922:+_5-3	2410015M20Rik	3.66498	6.55428	6.94423	0.559174	0.527773
1296	CGTCCATCGACGTAGCGCG	2410016O06Rik_CCDS26033.1_ex0_12:83951368-83951390:-_5-5	2410016O06Rik	16.9899	10.9526	13.7752	1.55122	1.23337
1294	GCTCGCACGCGGATGAGCC	2410016O06Rik_CCDS26033.1_ex0_12:83951088-83951110:+_5-3	2410016O06Rik	24.9848	20.2003	22.3467	1.23685	1.11805
1295	TCCGGACCACTTCTACCGG	2410016O06Rik_CCDS26033.1_ex0_12:83951218-83951240:+_5-4	2410016O06Rik	18.8802	15.8302	19.2925	1.19267	0.978628
1292	TTCCGCTTGCCCCGAACCG	2410016O06Rik_CCDS26033.1_ex0_12:83950915-83950937:-_5-1	2410016O06Rik	12.2487	10.3323	11.3778	1.18548	1.07655
1293	ACCTCGGGCGCGCTGACAC	2410016O06Rik_CCDS26033.1_ex0_12:83950983-83951005:-_5-2	2410016O06Rik	23.4354	22.484	26.5504	1.04231	0.882678
1301	GTCTGTCGATTCATCGAGC	2410018M08Rik_CCDS39292.1_ex3_5:129902219-129902241:-_5-5	2410018M08Rik	18.3534	12.5315	16.0741	1.46458	1.1418
1297	GTATCCTTGCCGGCGAAGC	2410018M08Rik_CCDS39292.1_ex3_5:129901861-129901883:-_5-1	2410018M08Rik	6.42293	4.4679	4.6782	1.43757	1.37295
1298	CGGACAGTGTCGTTAGATA	2410018M08Rik_CCDS39292.1_ex3_5:129902113-129902135:-_5-2	2410018M08Rik	11.0402	9.54287	9.83425	1.1569	1.12262
1300	GGATGCTGCATATTGGAAG	2410018M08Rik_CCDS39292.1_ex3_5:129902199-129902221:-_5-4	2410018M08Rik	10.6993	10.868	10.8195	0.984477	0.988891
1299	GCTGATATTCTTGATCAGG	2410018M08Rik_CCDS39292.1_ex3_5:129902156-129902178:+_5-3	2410018M08Rik	15.5025	17.7756	16.2383	0.87212	0.954687
1304	GGCCAGCTGCAAGAAGGGC	2410066E13Rik_CCDS20158.1_ex1_6:54689032-54689054:-_5-3	2410066E13Rik	13.6742	9.28912	11.2464	1.47206	1.21587
1305	GTCTGGAAGCCCCAGCAAC	2410066E13Rik_CCDS20158.1_ex2_6:54698976-54698998:-_5-4	2410066E13Rik	8.37518	6.86441	6.97708	1.22009	1.20039
1303	TCCGGACACAGTACGTAGA	2410066E13Rik_CCDS20158.1_ex0_6:54681888-54681910:-_5-2	2410066E13Rik	6.79478	5.99039	7.40401	1.13428	0.917717
1306	ACGCGTCGTCATCTGCGTC	2410066E13Rik_CCDS20158.1_ex2_6:54698992-54699014:-_5-5	2410066E13Rik	15.2855	15.4073	15.68	0.992098	0.974846
1302	ATGGACTTCTACGCCGACC	2410066E13Rik_CCDS20158.1_ex0_6:54681859-54681881:+_5-1	2410066E13Rik	15.7504	18.7906	17.4862	0.838204	0.90073
1310	TGCAGCGGGCTCGCCCACA	2410076I21Rik_CCDS52814.1_ex5_9:58741390-58741412:-_5-4	2410076I21Rik	14.2939	11.1217	14.5962	1.28522	0.97929
1307	ACGGTGACGTACTGGGCCA	2410076I21Rik_CCDS52814.1_ex2_9:58660267-58660289:+_5-1	2410076I21Rik	12.3417	11.2909	14.0707	1.09306	0.877115
1311	TTCATGCTCTTGGACAACG	2410076I21Rik_CCDS52814.1_ex5_9:58741440-58741462:-_5-5	2410076I21Rik	20.1197	20.003	20.4091	1.00584	0.985821
1308	TTGAAGATTGTAAGACGCA	2410076I21Rik_CCDS52814.1_ex3_9:58665862-58665884:-_5-2	2410076I21Rik	4.9355	5.37011	5.10513	0.919067	0.966771
1309	ACCTGATACAACGATCGTG	2410076I21Rik_CCDS52814.1_ex4_9:58712048-58712070:+_5-3	2410076I21Rik	13.3023	18.1139	12.6586	0.734368	1.05085
1315	ATTGCAATTTTGCGCGGTA	2410089E03Rik_CCDS49578.1_ex15_15:8201346-8201368:+_5-4	2410089E03Rik	12.6206	8.07677	12.166	1.56258	1.03737
1314	GCCGGTCTACTTTCATCAG	2410089E03Rik_CCDS49578.1_ex10_15:8187440-8187462:-_5-3	2410089E03Rik	14.8207	14.2795	16.1069	1.0379	0.920147
1316	TACAGTCATGCGGCACGTC	2410089E03Rik_CCDS49578.1_ex23_15:8216332-8216354:+_5-5	2410089E03Rik	16.68	16.7888	17.0593	0.99352	0.977767
1313	TGCGGTGAGCCTTATCAAG	2410089E03Rik_CCDS49578.1_ex10_15:8187276-8187298:-_5-2	2410089E03Rik	23.9312	28.574	24.1858	0.837517	0.989475
1312	ACCATTAGTGGATGTCGCC	2410089E03Rik_CCDS49578.1_ex1_15:8174842-8174864:-_5-1	2410089E03Rik	2.0536	2.77624	1.98523	0.739704	1.03444
1317	TGTCGATTGGCTTGGAGAA	2410124H12Rik_CCDS57040.1_ex0_16:92478853-92478875:+_5-1	2410124H12Rik	13.3953	11.7702	10.2612	1.13806	1.30543
1320	ACCTCTTGGGGACTCCAGC	2410124H12Rik_CCDS57040.1_ex0_16:92478924-92478946:-_5-4	2410124H12Rik	17.4547	16.5351	17.1906	1.05562	1.01536
1319	AGTGGACAGAACCTCGTGG	2410124H12Rik_CCDS57040.1_ex0_16:92478899-92478921:-_5-3	2410124H12Rik	9.49075	9.17634	9.44016	1.03426	1.00536
1321	TGCTATGGATGCGCTCATG	2410124H12Rik_CCDS57040.1_ex0_16:92478947-92478969:+_5-5	2410124H12Rik	21.0493	23.7528	27.4042	0.886184	0.768106
1318	GGCGGAGCAAGTAGCGCTC	2410124H12Rik_CCDS57040.1_ex0_16:92478882-92478904:-_5-2	2410124H12Rik	32.8868	45.6879	37.158	0.719814	0.885053
1324	GGATCTTGTCCAAGTGAAG	2410127L17Rik_CCDS29689.1_ex1_19:18677773-18677795:-_5-3	2410127L17Rik	7.91036	5.25734	6.02468	1.50463	1.31299
1322	CGCGCCTTACCCGTAGTAG	2410127L17Rik_CCDS29689.1_ex0_19:18671191-18671213:-_5-1	2410127L17Rik	13.8291	9.79662	11.6405	1.41162	1.18801
1325	CCAGCATCTACATTTGACA	2410127L17Rik_CCDS29689.1_ex2_19:18679121-18679143:+_5-4	2410127L17Rik	12.0628	8.72524	10.1298	1.38252	1.19082
1323	TTCACTCGTTCATGCATGC	2410127L17Rik_CCDS29689.1_ex1_19:18677690-18677712:-_5-2	2410127L17Rik	18.2604	14.5896	14.629	1.2516	1.24823
1326	AAGTAAATATTCTGGTACC	2410127L17Rik_CCDS29689.1_ex3_19:18690240-18690262:+_5-5	2410127L17Rik	5.33834	4.80623	5.10513	1.11071	1.04568
1330	AGTGCCGGAACTCTGTCCA	2410131K14Rik_CCDS39237.1_ex1_5:118255778-118255800:+_5-4	2410131K14Rik	19.1281	13.913	15.2859	1.37484	1.25136
89732	TTCAGGCTATGTCTGCGAG	2410131K14Rik_CCDS39237.1_ex2_5:118258970-118258992:+_5-5	2410131K14Rik	1	1	1	1	1
1327	AAGTCGCTTACCTGCTTGA	2410131K14Rik_CCDS39237.1_ex0_5:118245448-118245470:-_5-1	2410131K14Rik	12.8375	15.1253	15.1217	0.84874	0.848946
1328	CTGTTCCCGGTCTTGAACC	2410131K14Rik_CCDS39237.1_ex1_5:118255702-118255724:-_5-2	2410131K14Rik	10.5444	13.4901	12.0346	0.781638	0.87617
1329	GGTTAAACTGCACCTTCCA	2410131K14Rik_CCDS39237.1_ex1_5:118255730-118255752:-_5-3	2410131K14Rik	4.84253	6.32872	6.02468	0.765167	0.803782
1335	GGAAGGCTTCGTCCTCTGC	2410137M14Rik_CCDS50104.1_ex2_17:36978755-36978777:+_5-5	2410137M14Rik	10.9472	9.93759	11.5091	1.10159	0.951174
1332	TCCCACCACACCCATCACG	2410137M14Rik_CCDS50104.1_ex1_17:36978512-36978534:-_5-2	2410137M14Rik	24.644	24.3167	24.1858	1.01346	1.01894
1331	CCAGCAGTGATCCCCGTGA	2410137M14Rik_CCDS50104.1_ex1_17:36978500-36978522:+_5-1	2410137M14Rik	20.0577	20.1157	21.3943	0.997116	0.937526
1334	ATTTATGCTCTTCTCCTGA	2410137M14Rik_CCDS50104.1_ex2_17:36978710-36978732:+_5-4	2410137M14Rik	6.42293	7.79482	6.94423	0.823999	0.92493
1333	TCATCCTGAAATGGAGTAA	2410137M14Rik_CCDS50104.1_ex2_17:36978650-36978672:-_5-3	2410137M14Rik	5.74119	7.79482	5.72911	0.736538	1.00211
1338	GCGGCAGTTAGTCAGGTCG	2510002D24Rik_CCDS28029.1_ex1_16:18836819-18836841:-_5-3	2510002D24Rik	16.2152	13.2363	13.611	1.22505	1.19133
1340	AGCGAGCAGGTTCGGGTCC	2510002D24Rik_CCDS28029.1_ex2_16:18839104-18839126:+_5-5	2510002D24Rik	6.88775	5.84942	5.7948	1.17751	1.18861
1339	TCCCTCTGTGAGAGCGAGC	2510002D24Rik_CCDS28029.1_ex2_16:18839092-18839114:+_5-4	2510002D24Rik	10.2035	9.31732	10.2612	1.09511	0.994377
1337	GGAGCCACTGCCTGCAATC	2510002D24Rik_CCDS28029.1_ex1_16:18836799-18836821:-_5-2	2510002D24Rik	11.1951	11.4319	10.8852	0.979287	1.02847
1336	TACGTCCACGGCAAGCGGC	2510002D24Rik_CCDS28029.1_ex1_16:18836780-18836802:+_5-1	2510002D24Rik	20.0887	23.1325	23.529	0.868418	0.853786
1342	GCCGAGCGACAGGCGGTAG	2510003E04Rik_CCDS23890.1_ex6_10:62577990-62578012:+_5-2	2510003E04Rik	18.3224	14.0258	17.2563	1.30634	1.06178
1345	CGAGCCGGCTGCTGACGAT	2510003E04Rik_CCDS23890.1_ex6_10:62578183-62578205:-_5-5	2510003E04Rik	20.0577	16.2531	14.6619	1.23408	1.36802
1344	GTGGAACTCGACCACCGCG	2510003E04Rik_CCDS23890.1_ex6_10:62578089-62578111:+_5-4	2510003E04Rik	18.5703	17.1835	17.322	1.0807	1.07206
1343	GTGAACCACATCGACACGG	2510003E04Rik_CCDS23890.1_ex6_10:62578062-62578084:-_5-3	2510003E04Rik	10.4204	10.8116	9.83425	0.963815	1.0596
1341	GAAACCGCCCGGACCTACC	2510003E04Rik_CCDS23890.1_ex5_10:62575088-62575110:-_5-1	2510003E04Rik	13.2713	13.772	13.6767	0.963643	0.970362
1350	AGATGGACAGCCCGTCGCA	2510009E07Rik_CCDS28062.1_ex1_16:21694281-21694303:+_5-5	2510009E07Rik	18.0745	14.2513	17.0264	1.26827	1.06155
1349	CTTACAGTGACACCATCCC	2510009E07Rik_CCDS28062.1_ex1_16:21694210-21694232:+_5-4	2510009E07Rik	16.9589	15.2945	15.056	1.10882	1.12639
1347	TAGTTGTCGATGAAGAGAT	2510009E07Rik_CCDS28062.1_ex0_16:21653553-21653575:+_5-2	2510009E07Rik	1.09296	1.05639	1.26273	1.03462	0.865558
1348	TACAGTACCTTGGCGAGTC	2510009E07Rik_CCDS28062.1_ex0_16:21653581-21653603:+_5-3	2510009E07Rik	7.07368	8.80982	7.10844	0.802931	0.99511
1346	GAGAGTGACACTCCGAAAC	2510009E07Rik_CCDS28062.1_ex0_16:21653420-21653442:-_5-1	2510009E07Rik	3.94387	5.28553	6.28741	0.746164	0.627265
1352	GCGGGCGTAGCTGCACGAA	2510039O18Rik_CCDS18925.1_ex0_4:147941394-147941416:-_5-2	2510039O18Rik	10.5134	7.00538	10.1955	1.50075	1.03118
1354	AACGCGGCCACGCGCTCCG	2510039O18Rik_CCDS18925.1_ex0_4:147941656-147941678:-_5-4	2510039O18Rik	15.7813	14.646	16.7309	1.07752	0.943247
1353	ATAGACGTGGGGTCGGCCT	2510039O18Rik_CCDS18925.1_ex0_4:147941609-147941631:-_5-3	2510039O18Rik	13.4882	13.0672	14.6947	1.03222	0.917896
1355	TGTGGACCGGCCCGAGTAG	2510039O18Rik_CCDS18925.1_ex0_4:147941759-147941781:-_5-5	2510039O18Rik	29.726	31.4498	33.447	0.945188	0.88875
1351	CGAAGTCCGGCGTCACGGC	2510039O18Rik_CCDS18925.1_ex0_4:147941370-147941392:-_5-1	2510039O18Rik	27.247	33.4798	28.8164	0.813833	0.945537
1356	CGCGGCATACAGCGAGACG	2510049J12Rik_CCDS51877.1_ex1_6:115586760-115586782:-_5-1	2510049J12Rik	13.8291	7.56927	10.9837	1.82701	1.25906
1357	TGTATAATTACAGTGCACG	2510049J12Rik_CCDS51877.1_ex1_6:115586777-115586799:-_5-2	2510049J12Rik	2.48743	1.93041	1.91955	1.28855	1.29584
1359	CTGTTTCAGGGAGTACGAT	2510049J12Rik_CCDS51877.1_ex2_6:115589382-115589404:-_5-4	2510049J12Rik	5.40032	4.60887	5.46639	1.17172	0.987914
1360	TAAGGAACGTCCCTCGCGT	2510049J12Rik_CCDS51877.1_ex3_6:115592274-115592296:+_5-5	2510049J12Rik	22.4748	22.1457	27.5356	1.01486	0.816209
1358	TTGGAATCACTAACACACG	2510049J12Rik_CCDS51877.1_ex2_6:115589344-115589366:-_5-3	2510049J12Rik	7.56949	10.1631	9.34163	0.744798	0.810296
1361	CAATCCGCGGTCCCGCTCA	2610002J02Rik_CCDS57317.1_ex1_4:155250580-155250602:-_5-1	2610002J02Rik	17.2068	15.8302	18.3729	1.08696	0.93653
1364	CCACAGTGAAGGCCTCAGG	2610002J02Rik_CCDS57317.1_ex2_4:155250786-155250808:-_5-4	2610002J02Rik	39.7352	39.2878	36.1399	1.01139	1.09948
1363	GCTTTTGGACACACCTGGC	2610002J02Rik_CCDS57317.1_ex1_4:155250643-155250665:-_5-3	2610002J02Rik	24.7059	25.6136	25.7293	0.964563	0.960225
1362	CGGTTCGGGGTCCAATCCG	2610002J02Rik_CCDS57317.1_ex1_4:155250592-155250614:-_5-2	2610002J02Rik	35.7687	38.9495	36.1399	0.918335	0.989728
1365	ACCTGTTCTGTGAACCTGA	2610002J02Rik_CCDS57317.1_ex2_4:155250870-155250892:+_5-5	2610002J02Rik	19.7478	23.6118	20.836	0.836354	0.947774
1370	TTCTTGAGAATGAGTGCTA	2610002M06Rik_CCDS53171.1_ex5_X:107793555-107793577:-_5-5	2610002M06Rik	7.87937	5.11637	7.00992	1.54003	1.12403
1367	GCAGGTGTAGTTAAATCTA	2610002M06Rik_CCDS53171.1_ex4_X:107793125-107793147:-_5-2	2610002M06Rik	2.11557	1.5075	1.52546	1.40337	1.38685
1366	AGGAGTATGAACCTTGAGA	2610002M06Rik_CCDS53171.1_ex4_X:107793092-107793114:-_5-1	2610002M06Rik	3.07621	2.60707	3.00331	1.17995	1.02427
1369	AGTGCTAGGGTTGATGCTG	2610002M06Rik_CCDS53171.1_ex5_X:107793543-107793565:-_5-4	2610002M06Rik	15.1926	20.2567	19.7851	0.750002	0.76788
1368	TTCAAACTGCAGTAACAAT	2610002M06Rik_CCDS53171.1_ex5_X:107793512-107793534:-_5-3	2610002M06Rik	2.08459	5.70845	3.49592	0.365176	0.596291
1371	TCCGAATTCACAGCACACC	2610008E11Rik_CCDS35965.1_ex0_10:79067953-79067975:-_5-1	2610008E11Rik	10.4514	7.20274	7.30549	1.45103	1.43062
1374	CGTTATGCACTAACCTGGA	2610008E11Rik_CCDS35965.1_ex3_10:79092397-79092419:+_5-4	2610008E11Rik	12.7135	9.3737	8.78333	1.3563	1.44746
1373	ATCGCATGGATTTGAGCCG	2610008E11Rik_CCDS35965.1_ex2_10:79088321-79088343:-_5-3	2610008E11Rik	12.6825	9.48648	13.611	1.33691	0.931788
1372	CCTCGCTTTGGAGCCTCCC	2610008E11Rik_CCDS35965.1_ex2_10:79088286-79088308:-_5-2	2610008E11Rik	10.4514	10.3887	12.3959	1.00603	0.843136
1375	CGTGAATTTGGGCCATGGA	2610008E11Rik_CCDS35965.1_ex3_10:79092442-79092464:-_5-5	2610008E11Rik	9.21186	10.5015	9.17743	0.877197	1.00375
1377	AAGGATCCTCGTCTTACCA	2610015P09Rik_CCDS57030.1_ex3_16:43906927-43906949:+_5-2	2610015P09Rik	6.45392	3.73485	5.56491	1.72803	1.15975
1379	CATACACGATCCCGGAAGT	2610015P09Rik_CCDS57030.1_ex6_16:43931316-43931338:+_5-4	2610015P09Rik	10.0795	6.58247	10.5568	1.53127	0.954795
1380	TCTCGCAAAGGAGCAAACT	2610015P09Rik_CCDS57030.1_ex7_16:43939018-43939040:+_5-5	2610015P09Rik	6.88775	5.73664	7.27264	1.20066	0.947076
1378	TTAAGACGCGAGAAACAAC	2610015P09Rik_CCDS57030.1_ex4_16:43908426-43908448:+_5-3	2610015P09Rik	2.73534	2.52249	2.93762	1.08438	0.931139
1376	TCAAATGGTCATGGGCGTC	2610015P09Rik_CCDS57030.1_ex2_16:43905444-43905466:-_5-1	2610015P09Rik	11.7839	11.7138	12.7243	1.00598	0.926095
1382	GAACAAGGTGATGTTAAAC	2610018G03Rik_CCDS40968.1_ex4_X:50885806-50885828:+_5-2	2610018G03Rik	29.1992	5.37011	9.37447	5.43735	3.11476
1385	GATCGATCGATTTAAGAGA	2610018G03Rik_CCDS40968.1_ex6_X:50887937-50887959:+_5-5	2610018G03Rik	6.29897	4.58067	5.92616	1.37512	1.06291
1381	TATACCTTTAATGTCTCGG	2610018G03Rik_CCDS40968.1_ex3_X:50885681-50885703:-_5-1	2610018G03Rik	7.94135	5.87761	5.49923	1.35112	1.44408
1384	TAAAGTCTCCAATAAGAGT	2610018G03Rik_CCDS40968.1_ex5_X:50886762-50886784:-_5-4	2610018G03Rik	2.45644	1.84583	1.5583	1.33081	1.57636
1383	CAAAACGGAGTCCCTACGA	2610018G03Rik_CCDS40968.1_ex4_X:50885880-50885902:-_5-3	2610018G03Rik	50.3022	54.3436	55.8118	0.925632	0.901283
1387	TTTAGTGCCTTACATCCAT	2610020H08Rik_CCDS21787.1_ex6_7:119819426-119819448:+_5-2	2610020H08Rik	5.27637	3.73485	3.72581	1.41274	1.41617
1388	AATCCAGAATCTTGAGATC	2610020H08Rik_CCDS21787.1_ex6_7:119819516-119819538:-_5-3	2610020H08Rik	3.04522	2.4661	2.67489	1.23483	1.13844
1389	AAGTAACGAATACCTGGTA	2610020H08Rik_CCDS21787.1_ex6_7:119819539-119819561:-_5-4	2610020H08Rik	1.24791	1.42291	1.26273	0.877007	0.988261
1390	GTGGGCCATTGCCTAGACT	2610020H08Rik_CCDS21787.1_ex7_7:119823855-119823877:+_5-5	2610020H08Rik	15.3785	22.5686	14.6619	0.681411	1.04888
1386	CACAGTCAAGTCCAAAGAG	2610020H08Rik_CCDS21787.1_ex5_7:119818445-119818467:-_5-1	2610020H08Rik	4.62561	7.85121	5.99184	0.589159	0.771985
1395	ACTCGCCTTTTAGACATGG	2610028H24Rik_CCDS35945.1_ex5_10:76457487-76457509:+_5-5	2610028H24Rik	6.36095	4.63706	5.82764	1.37176	1.09151
1393	TGCGGTAGCTGCTGAATGA	2610028H24Rik_CCDS35945.1_ex4_10:76454724-76454746:-_5-3	2610028H24Rik	24.9538	21.8638	27.864	1.14133	0.895559
1394	GAGAAATCTGTGCAATCAG	2610028H24Rik_CCDS35945.1_ex4_10:76454753-76454775:-_5-4	2610028H24Rik	13.1164	11.6574	10.9837	1.12515	1.19417
1392	GGATCATCCAGCACCCGGT	2610028H24Rik_CCDS35945.1_ex3_10:76452931-76452953:+_5-2	2610028H24Rik	13.8601	12.9262	13.3482	1.07225	1.03835
1391	CCATGCATCCTCCAGGCAT	2610028H24Rik_CCDS35945.1_ex3_10:76452815-76452837:-_5-1	2610028H24Rik	14.4489	16.3377	14.9903	0.884388	0.963881
1399	CCTCATGTCATCTTACAGT	2610034B18Rik_CCDS21390.1_ex3_7:79929568-79929590:-_5-4	2610034B18Rik	13.0854	8.8944	11.542	1.47119	1.13372
1398	CTCTGTCAATTCCAGCAGC	2610034B18Rik_CCDS21390.1_ex2_7:79928289-79928311:+_5-3	2610034B18Rik	12.0628	8.9226	11.1807	1.35194	1.07889
1400	GGGGTCAAACTTACGCCTG	2610034B18Rik_CCDS21390.1_ex3_7:79929645-79929667:+_5-5	2610034B18Rik	11.474	9.57106	12.2645	1.19882	0.935546
1397	CATCCAGAATGCCACCGCC	2610034B18Rik_CCDS21390.1_ex2_7:79928253-79928275:+_5-2	2610034B18Rik	15.4095	16.0839	13.4139	0.958067	1.14877
1396	GGTCATGGAACTCGAACTG	2610034B18Rik_CCDS21390.1_ex2_7:79928215-79928237:-_5-1	2610034B18Rik	12.0938	17.2963	13.0855	0.699211	0.92421
1405	CCGTGAAAAATCGTTACCA	2610034M16Rik_CCDS37673.1_ex10_17:58974944-58974966:-_5-5	2610034M16Rik	8.99494	6.32872	8.38924	1.42129	1.0722
1403	TTTACTCAGTCCGTCCCAC	2610034M16Rik_CCDS37673.1_ex10_17:58973774-58973796:-_5-3	2610034M16Rik	20.0267	15.2663	18.2744	1.31182	1.09589
1401	TTCGGAACTAGAATGCTGC	2610034M16Rik_CCDS37673.1_ex10_17:58973558-58973580:+_5-1	2610034M16Rik	9.1189	6.97719	5.72911	1.30696	1.59168
1402	ACCCCAATATATTGACTAA	2610034M16Rik_CCDS37673.1_ex10_17:58973705-58973727:+_5-2	2610034M16Rik	1.99162	2.77624	2.70774	0.717381	0.73553
1404	GACTCACAGGGTTCATCCG	2610034M16Rik_CCDS37673.1_ex10_17:58974470-58974492:+_5-4	2610034M16Rik	4.4087	6.4415	5.959	0.684421	0.739838
1406	GTGAGCGGCCCAAAGGCGA	2610301B20Rik_CCDS17961.1_ex0_4:10874693-10874715:+_5-1	2610301B20Rik	7.10467	6.55428	6.91139	1.08397	1.02796
1409	CATGCAAGGCGTCAGTAAA	2610301B20Rik_CCDS17961.1_ex2_4:10881847-10881869:+_5-4	2610301B20Rik	11.7839	11.7138	14.1364	1.00598	0.833582
1410	TGGAACAAATACTTCACAG	2610301B20Rik_CCDS17961.1_ex3_4:10882451-10882473:+_5-5	2610301B20Rik	9.49075	9.71204	11.7719	0.977216	0.806223
1407	AAGATTTTCTGTCAAAGTC	2610301B20Rik_CCDS17961.1_ex1_4:10879587-10879609:-_5-2	2610301B20Rik	6.51589	7.51288	7.20696	0.867296	0.904111
1408	GTGTCAGAGCTCCCATGCA	2610301B20Rik_CCDS17961.1_ex2_4:10881834-10881856:+_5-3	2610301B20Rik	10.9162	18.4241	14.235	0.592497	0.76686
1411	GCAACGATAGAACTCCTCC	2610301G19Rik_CCDS49534.1_ex11_14:70143467-70143489:+_5-2	2610301G19Rik	9.27384	5.17275	6.71435	1.79282	1.3812
1414	GCCGCATACAACCCAGGCC	2610301G19Rik_CCDS49534.1_ex16_14:70151605-70151627:-_5-5	2610301G19Rik	7.63147	5.17275	6.84571	1.47532	1.11478
1413	AACGCAAACAGCGGGCTGG	2610301G19Rik_CCDS49534.1_ex13_14:70145921-70145943:-_5-4	2610301G19Rik	7.94135	5.48289	6.71435	1.44839	1.18274
1412	CACCACCCAAGTCGGATCC	2610301G19Rik_CCDS49534.1_ex12_14:70143668-70143690:-_5-3	2610301G19Rik	24.3961	22.1457	22.8393	1.10162	1.06816
1415	GTAACTGCCGGGGCGGCCC	2610301G19Rik_CCDS49534.1_ex9_14:70142478-70142500:+_5-1	2610301G19Rik	25.7285	32.0701	27.043	0.802259	0.951395
1417	TTATGAGGTGTACTTTGGG	2610305D13Rik_CCDS59663.1_ex0_4:147613891-147613913:+_4-3	2610305D13Rik	9.39779	7.79482	8.61913	1.20564	1.09034
1418	GCACATTTTCAATGAGCAT	2610305D13Rik_CCDS59663.1_ex0_4:147613969-147613991:-_4-4	2610305D13Rik	3.63399	3.59387	3.89001	1.01116	0.934185
1416	AGGTTTGAAGATTGAAGAG	2610305D13Rik_CCDS59663.1_ex0_4:147613852-147613874:+_4-2	2610305D13Rik	5.15241	5.17275	4.87525	0.996067	1.05685
1421	TAAACCAGTGCAATGACAT	2610318N02Rik_CCDS37269.1_ex4_16:17121027-17121049:-_5-3	2610318N02Rik	6.36095	5.00359	6.48446	1.27128	0.980953
1423	TTGGATCGCAACCCAGCAC	2610318N02Rik_CCDS37269.1_ex5_16:17121364-17121386:-_5-5	2610318N02Rik	13.953	14.6178	16.1069	0.954522	0.866278
1419	CGGGGCATAGTGTAGACAG	2610318N02Rik_CCDS37269.1_ex3_16:17118328-17118350:+_5-1	2610318N02Rik	12.6515	15.4919	14.3335	0.816657	0.882657
1420	TTGACTGATCTCGAAAGAT	2610318N02Rik_CCDS37269.1_ex3_16:17118446-17118468:+_5-2	2610318N02Rik	7.44554	9.34551	8.19219	0.796697	0.908857
1422	CGGAGAGAGTCGTGCGGAA	2610318N02Rik_CCDS37269.1_ex5_16:17121342-17121364:-_5-4	2610318N02Rik	17.2378	22.625	17.1578	0.761891	1.00466
1424	ATAGAGACGACGAGAGCGC	2610507B11Rik_CCDS25097.1_ex15_11:78272154-78272176:-_5-3	2610507B11Rik	3.8819	3.11457	3.59444	1.24637	1.07997
1426	ACGTCGACGGGAGCATGGC	2610507B11Rik_CCDS25097.1_ex16_11:78272863-78272885:-_5-5	2610507B11Rik	15.9363	14.0258	15.7785	1.13622	1.01
1427	GAAGCTTCGAAGCGGCAGT	2610507B11Rik_CCDS25097.1_ex8_11:78266649-78266671:-_5-1	2610507B11Rik	15.9673	15.2663	18.767	1.04592	0.850816
1428	GACAATTCGTTGGCGACTC	2610507B11Rik_CCDS25097.1_ex9_11:78266952-78266974:-_5-2	2610507B11Rik	6.88775	6.72344	6.68151	1.02444	1.03087
1425	ATCCGGGACTGGCGGCTAA	2610507B11Rik_CCDS25097.1_ex16_11:78272812-78272834:+_5-4	2610507B11Rik	18.7252	24.4013	20.4091	0.767388	0.917495
1430	GAGCTGGACAGGTTGCACA	2610524H06Rik_CCDS39225.1_ex0_5:114822669-114822691:-_5-2	2610524H06Rik	13.984	10.6988	11.5091	1.30706	1.21504
1432	CCGCAGCACCTCGTAGGAC	2610524H06Rik_CCDS39225.1_ex1_5:114823325-114823347:+_5-5	2610524H06Rik	13.0234	10.4451	10.8852	1.24684	1.19644
1429	TAAAGCCTCCAAGGGTCAC	2610524H06Rik_CCDS39225.1_ex0_5:114822602-114822624:+_5-1	2610524H06Rik	4.87352	5.4265	4.84241	0.898096	1.00643
1431	TGCTGCGGAGGCAGAGCCT	2610524H06Rik_CCDS39225.1_ex1_5:114823312-114823334:-_5-4	2610524H06Rik	3.38609	3.79123	4.31695	0.893136	0.784371
1435	CCTTTCCAGGTTGTCAGCT	2610528A11Rik_CCDS56949.1_ex1_14:37107372-37107394:+_5-3	2610528A11Rik	16.1222	13.2645	15.9427	1.21544	1.01126
1434	TGAGGTCACTTACCTTTCC	2610528A11Rik_CCDS56949.1_ex1_14:37107360-37107382:+_5-2	2610528A11Rik	10.8232	9.06357	9.50584	1.19415	1.13859
1433	ATACCCAGGAAACCACACA	2610528A11Rik_CCDS56949.1_ex0_14:37102678-37102700:-_5-1	2610528A11Rik	8.22024	7.31552	8.02799	1.12367	1.02395
1437	CGCCTGAGTTTCAAGGACT	2610528A11Rik_CCDS56949.1_ex1_14:37107417-37107439:+_5-5	2610528A11Rik	9.1189	11.7138	10.3597	0.778473	0.880227
1436	CAGCTTGGATCTAGGAGAT	2610528A11Rik_CCDS56949.1_ex1_14:37107386-37107408:+_5-4	2610528A11Rik	7.19763	10.5861	10.4911	0.679916	0.686072
1439	GTAACTGGCATGGTATCGG	2610528J11Rik_CCDS18554.1_ex1_4:118529624-118529646:-_5-2	2610528J11Rik	21.2972	12.3341	12.5272	1.7267	1.70008
1441	CGCCCGCTGTCCAGTGCAG	2610528J11Rik_CCDS18554.1_ex1_4:118529651-118529673:+_5-4	2610528J11Rik	22.7847	15.1817	20.3762	1.5008	1.1182
1440	AGCGGGCGATGCCTGTAAC	2610528J11Rik_CCDS18554.1_ex1_4:118529638-118529660:-_5-3	2610528J11Rik	7.97233	6.55428	8.71765	1.21636	0.914505
1442	GTGGGAACCGCCCACCGGT	2610528J11Rik_CCDS18554.1_ex1_4:118529673-118529695:+_5-5	2610528J11Rik	1	1	1.06568	1	0.938366
1438	CTCTCCATTCTCATCGCGC	2610528J11Rik_CCDS18554.1_ex1_4:118529582-118529604:+_5-1	2610528J11Rik	11.9388	12.2777	12.3302	0.972397	0.968261
1444	CATTTTATGTTTCCCAGCA	2700029M09Rik_CCDS52553.1_ex2_8:60895510-60895532:-_5-2	2700029M09Rik	8.28222	6.9208	6.45162	1.19671	1.28374
1445	GAACTGTAATCTTCACTGG	2700029M09Rik_CCDS52553.1_ex2_8:60895551-60895573:+_5-3	2700029M09Rik	4.90451	4.15776	4.84241	1.1796	1.01282
90203	TTATTATCTCCAATAATAA	2700029M09Rik_CCDS52553.1_ex2_8:60895602-60895624:-_5-4	2700029M09Rik	1	1	1	1	1
1446	TTACCTGAAATACCCCATG	2700029M09Rik_CCDS52553.1_ex2_8:60895633-60895655:-_5-5	2700029M09Rik	10.3274	12.8698	9.21027	0.802455	1.1213
1443	AGTGACCTTCGAAAAGAAG	2700029M09Rik_CCDS52553.1_ex1_8:60893754-60893776:+_5-1	2700029M09Rik	5.02846	6.89261	5.17082	0.729544	0.972469
1450	GTACAGGGGCAAACCTGCG	2700049A03Rik_CCDS49081.1_ex7_12:71154821-71154843:-_5-2	2700049A03Rik	6.36095	5.14456	5.36786	1.23644	1.18501
1448	GAAGCTATCGTTCGTGCAA	2700049A03Rik_CCDS49081.1_ex10_12:71160340-71160362:+_5-4	2700049A03Rik	10.9472	12.616	12.7243	0.86772	0.86034
1449	TGCGGTGGCCCTGATAAAC	2700049A03Rik_CCDS49081.1_ex13_12:71164447-71164469:-_5-5	2700049A03Rik	12.2177	14.8716	15.3515	0.821547	0.795862
1447	TTACACTTTTCTTGGACGC	2700049A03Rik_CCDS49081.1_ex1_12:71139711-71139733:-_5-1	2700049A03Rik	12.8065	17.4373	17.5847	0.734432	0.728273
1451	CATCATTATACTTCGGCAC	2700049A03Rik_CCDS49081.1_ex9_12:71158889-71158911:-_5-3	2700049A03Rik	2.39447	4.10137	6.02468	0.583821	0.397443
1455	TGAGACGTAAGCTAACTGC	2700050L05Rik_CCDS21932.2_ex7_7:133647444-133647466:-_5-4	2700050L05Rik	11.1021	8.8944	10.6224	1.24822	1.04516
1454	ATACGCCATGCCGAAACTA	2700050L05Rik_CCDS21932.2_ex2_7:133640674-133640696:-_5-3	2700050L05Rik	10.0176	10.1068	9.473	0.991174	1.05749
1453	TACGAGAGAGTGCCAAACT	2700050L05Rik_CCDS21932.2_ex1_7:133639039-133639061:+_5-2	2700050L05Rik	5.77218	6.13136	5.17082	0.941418	1.1163
1456	CATGTTAACGGGATCGTAC	2700050L05Rik_CCDS21932.2_ex8_7:133648276-133648298:+_5-5	2700050L05Rik	16.587	17.691	15.8113	0.937597	1.04906
1452	GTGCAAACGCTGTTCGAGG	2700050L05Rik_CCDS21932.2_ex1_7:133638973-133638995:-_5-1	2700050L05Rik	7.60048	10.3041	9.14459	0.737616	0.831145
1458	TGACACCCGCCTTAAAATC	2700060E02Rik_CCDS26839.1_ex3_14:19816243-19816265:+_5-2	2700060E02Rik	6.05107	3.9604	6.64866	1.52789	0.910118
1461	TGGCCCAAGTTCTTTGAAA	2700060E02Rik_CCDS26839.1_ex6_14:19822565-19822587:-_5-5	2700060E02Rik	4.43969	4.72165	5.00661	0.940283	0.886765
1460	TCCTTTCAAGATTCAGGAT	2700060E02Rik_CCDS26839.1_ex5_14:19819965-19819987:-_5-4	2700060E02Rik	6.57787	7.73844	8.12651	0.850026	0.809433
1457	GTTCAGGAACGTCTAACAC	2700060E02Rik_CCDS26839.1_ex2_14:19814569-19814591:-_5-1	2700060E02Rik	2.92127	4.4397	3.66013	0.657987	0.798132
1459	TAGCTGTTAGACTTGAATA	2700060E02Rik_CCDS26839.1_ex5_14:19819915-19819937:-_5-3	2700060E02Rik	2.70435	4.32693	2.93762	0.625005	0.920591
89868	CCGAAGACGCCAAAGAGAA	2700062C07Rik_CCDS29101.1_ex3_18:24475632-24475654:+_5-4	2700062C07Rik	1	1	1	1	1
1464	CTCTACAAGTGTGCTGGTA	2700062C07Rik_CCDS29101.1_ex2_18:24473133-24473155:+_5-3	2700062C07Rik	7.63147	8.35871	7.00992	0.912996	1.08867
1465	ACCATTTGTACTCTGACCG	2700062C07Rik_CCDS29101.1_ex3_18:24475671-24475693:-_5-5	2700062C07Rik	14.6038	16.4223	15.4172	0.889268	0.947239
1463	ATACAGAAACTTCTTAATC	2700062C07Rik_CCDS29101.1_ex2_18:24473053-24473075:+_5-2	2700062C07Rik	1.40285	1.76125	1.42693	0.796508	0.983119
1462	CTACAGTTCGACACACGGT	2700062C07Rik_CCDS29101.1_ex1_18:24471067-24471089:+_5-1	2700062C07Rik	4.00585	6.01858	4.77672	0.66558	0.838619
1469	CGCCTCGCAGCCTCCCGAA	2700081O15Rik_CCDS29524.2_ex2_19:7421331-7421353:+_5-4	2700081O15Rik	12.7445	11.1217	13.3482	1.14591	0.954771
1467	CCAGCGGCGAGGGGTCCGA	2700081O15Rik_CCDS29524.2_ex2_19:7421285-7421307:+_5-2	2700081O15Rik	14.17	13.0954	14.235	1.08206	0.995435
1466	GGTAGGGGGGTACTCCCCC	2700081O15Rik_CCDS29524.2_ex1_19:7420103-7420125:-_5-1	2700081O15Rik	7.2906	7.45649	9.04606	0.977751	0.805941
1470	TCATGGACTACGACCCACG	2700081O15Rik_CCDS29524.2_ex2_19:7421437-7421459:+_5-5	2700081O15Rik	6.85676	7.14636	8.58629	0.959477	0.798571
1468	CTCAGTGGCACCTCGGCGC	2700081O15Rik_CCDS29524.2_ex2_19:7421309-7421331:+_5-3	2700081O15Rik	17.3927	26.2903	21.8212	0.661565	0.797055
1472	CGCCTTCTTCGAGCTGGCC	2700089E24Rik_CCDS51934.1_ex0_6:133105517-133105539:+_3-2	2700089E24Rik	34.0334	34.8331	35.4503	0.97704	0.960031
1473	AAGTTCATGCGCAGCTGCC	2700089E24Rik_CCDS51934.1_ex0_6:133105535-133105557:-_3-3	2700089E24Rik	13.3953	20.3131	17.6504	0.65944	0.75892
1471	AAGAAGGCGAGCAGGGTGC	2700089E24Rik_CCDS51934.1_ex0_6:133105505-133105527:-_3-1	2700089E24Rik	6.11305	13.2081	11.2136	0.462825	0.545147
1478	TGGTCATTGAGCATTGGTG	2700094K13Rik_CCDS16187.1_ex2_2:84670477-84670499:-_5-5	2700094K13Rik	16.2772	14.9844	9.21027	1.08628	1.76728
1476	GGCCTCCAGTTGCAGAGCC	2700094K13Rik_CCDS16187.1_ex1_2:84670326-84670348:+_5-3	2700094K13Rik	12.7755	11.9676	11.8704	1.06751	1.07625
1475	TCACTTGCACAGGTAGCTC	2700094K13Rik_CCDS16187.1_ex1_2:84670304-84670326:+_5-2	2700094K13Rik	11.7219	12.1367	12.7243	0.965819	0.921224
1477	GTACGAGCTGACGCGTGTA	2700094K13Rik_CCDS16187.1_ex1_2:84670370-84670392:-_5-4	2700094K13Rik	12.6206	13.9694	11.9032	0.903445	1.06026
1474	AACCCGTCCAAACCGCGGA	2700094K13Rik_CCDS16187.1_ex1_2:84670284-84670306:-_5-1	2700094K13Rik	9.95558	15.5201	11.0494	0.641465	0.901009
1483	GTGCTTTGCTCGGAACATC	2700097O09Rik_CCDS25912.1_ex6_12:55062999-55063021:-_5-5	2700097O09Rik	13.4572	12.0804	10.5896	1.11398	1.2708
1480	GAAAGGTCTTGGTTGACGT	2700097O09Rik_CCDS25912.1_ex4_12:55059485-55059507:-_5-2	2700097O09Rik	5.02846	4.63706	4.28411	1.08441	1.17375
1481	AATGAACTTCAACTCCGTG	2700097O09Rik_CCDS25912.1_ex4_12:55059534-55059556:+_5-3	2700097O09Rik	5.89613	6.04678	7.0756	0.975086	0.833305
1479	GCTGCACTTTACCCCATAA	2700097O09Rik_CCDS25912.1_ex4_12:55059444-55059466:+_5-1	2700097O09Rik	21.0493	30.3221	22.9707	0.694192	0.916357
1482	TTGATACATTATGTGAGGA	2700097O09Rik_CCDS25912.1_ex5_12:55061111-55061133:-_5-4	2700097O09Rik	3.63399	6.35692	5.03945	0.57166	0.721109
1486	AAGGTCGTTAAAAAAGATG	2810004N23Rik_CCDS22775.1_ex4_8:124842389-124842411:-_5-3	2810004N23Rik	1.49581	1.16917	1.26273	1.27938	1.18459
1487	TGCCTGGATCTCCTGTACG	2810004N23Rik_CCDS22775.1_ex5_8:124861148-124861170:-_5-4	2810004N23Rik	12.9304	16.7888	14.8261	0.770182	0.872141
1484	GATAGCTCGCTCCCGCTCC	2810004N23Rik_CCDS22775.1_ex3_8:124841701-124841723:+_5-1	2810004N23Rik	4.84253	6.83622	6.84571	0.708364	0.707382
1488	ACGCTCACCCAGGTCGTAG	2810004N23Rik_CCDS22775.1_ex6_8:124862876-124862898:+_5-5	2810004N23Rik	8.00332	12.0522	10.5568	0.664057	0.758124
1485	GTACACCGCTTTGGGATCA	2810004N23Rik_CCDS22775.1_ex3_8:124841749-124841771:-_5-2	2810004N23Rik	5.98909	12.3341	9.30879	0.485572	0.64338
1492	TCGAAGAACAGTTCGTGAA	2810006K23Rik_CCDS51647.1_ex0_5:124338831-124338853:+_5-4	2810006K23Rik	2.89028	1.73305	1.75534	1.66774	1.64656
1493	TGCTCAAACACGTGCCCTC	2810006K23Rik_CCDS51647.1_ex0_5:124338900-124338922:+_5-5	2810006K23Rik	13.2093	13.3209	13.611	0.991624	0.970492
1490	ATTCAGGGGGAGCAGAGCA	2810006K23Rik_CCDS51647.1_ex0_5:124338800-124338822:-_5-2	2810006K23Rik	9.3668	9.74023	9.67004	0.961661	0.968641
1489	GCACTGCTCTTCCCAGGAA	2810006K23Rik_CCDS51647.1_ex0_5:124338740-124338762:+_5-1	2810006K23Rik	6.94973	9.43009	9.6372	0.736973	0.721135
1491	CGAGCTCACTCTCATTCAG	2810006K23Rik_CCDS51647.1_ex0_5:124338813-124338835:-_5-3	2810006K23Rik	6.91874	11.4601	9.44016	0.603725	0.732905
1497	GACAATTTCATTCAACCAG	2810007J24Rik_CCDS20833.1_ex4_7:14425530-14425552:+_5-4	2810007J24Rik	6.82577	4.52429	6.18889	1.5087	1.10291
1494	ACTTCAATGCTCTAAAACA	2810007J24Rik_CCDS20833.1_ex3_7:14423490-14423512:-_5-1	2810007J24Rik	1.99162	1.4793	1.49262	1.34632	1.33432
1498	TAGTGACTTATCCAAAATC	2810007J24Rik_CCDS20833.1_ex5_7:14427783-14427805:-_5-5	2810007J24Rik	1.65075	1.53569	2.24796	1.07492	0.734333
1495	TGCCAATGAGCGCACACCA	2810007J24Rik_CCDS20833.1_ex4_7:14425462-14425484:-_5-2	2810007J24Rik	14.5418	15.3791	12.7899	0.945558	1.13697
1496	ATTGTAGATTGGACCCATG	2810007J24Rik_CCDS20833.1_ex4_7:14425483-14425505:+_5-3	2810007J24Rik	8.15826	11.2063	9.89993	0.728005	0.824073
1501	CATACAGTGCGCACATCGA	2810021J22Rik_CCDS24751.1_ex3_11:58880298-58880320:-_5-3	2810021J22Rik	35.4278	36.2429	36.3698	0.977512	0.9741
1500	CTAAGAGGCGCGGGAGGTC	2810021J22Rik_CCDS24751.1_ex3_11:58880217-58880239:-_5-2	2810021J22Rik	16.711	17.9166	15.68	0.932712	1.06575
1502	TCGTCGAGCTGTCTCCCAA	2810021J22Rik_CCDS24751.1_ex3_11:58880336-58880358:-_5-4	2810021J22Rik	10.6683	12.5879	11.739	0.847508	0.908789
1503	GGTTACACGTGTCAGAGAA	2810021J22Rik_CCDS24751.1_ex3_11:58880441-58880463:-_5-5	2810021J22Rik	10.5444	12.5597	11.7062	0.839541	0.90075
1499	ATCTGAGGTGCTTGATACA	2810021J22Rik_CCDS24751.1_ex3_11:58880112-58880134:+_5-1	2810021J22Rik	6.79478	9.8812	10.2283	0.687648	0.66431
1507	GCCAAAACCTACTCCGGAC	2810403A07Rik_CCDS17483.1_ex5_3:88693575-88693597:-_5-4	2810403A07Rik	7.69344	6.07497	7.30549	1.26642	1.0531
1504	CTAGTTAGGCTTTTGCCAG	2810403A07Rik_CCDS17483.1_ex2_3:88689182-88689204:-_5-1	2810403A07Rik	26.5033	21.4409	26.6817	1.23611	0.993311
1508	TGCCAAAGTCTTTCTACGA	2810403A07Rik_CCDS17483.1_ex6_3:88696686-88696708:+_5-5	2810403A07Rik	6.63984	5.4547	6.05753	1.21727	1.09613
1506	CTGTTGCACCATTGAAAGT	2810403A07Rik_CCDS17483.1_ex5_3:88693486-88693508:-_5-3	2810403A07Rik	3.01423	2.57888	3.79149	1.16881	0.794999
1505	GGGCTGCTGTGTCAACTCG	2810403A07Rik_CCDS17483.1_ex3_3:88689639-88689661:+_5-2	2810403A07Rik	12.7755	15.9148	15.4829	0.802744	0.825135
1510	AACTAAGGCGTCCACCCCC	2810408A11Rik_CCDS24920.1_ex8_11:69900431-69900453:-_5-2	2810408A11Rik	11.8768	10.0504	12.5929	1.18173	0.943138
1511	ACCTCCTGAAGTTGCGGAG	2810408A11Rik_CCDS24920.1_ex8_11:69900497-69900519:+_5-3	2810408A11Rik	13.0544	12.3059	10.6881	1.06082	1.22139
1512	GCGAAGCAAGGCTACTCCG	2810408A11Rik_CCDS24920.1_ex8_11:69900613-69900635:+_5-4	2810408A11Rik	1.65075	1.59208	1.65682	1.03685	0.996336
1513	CAGACACCGGATTACCCCC	2810408A11Rik_CCDS24920.1_ex8_11:69900630-69900652:-_5-5	2810408A11Rik	7.87937	8.30232	7.73242	0.949056	1.019
1509	CTTACTTCTCCGAACCGGG	2810408A11Rik_CCDS24920.1_ex8_11:69900297-69900319:+_5-1	2810408A11Rik	22.5987	26.9387	25.0397	0.838894	0.902518
1514	GCGTCTAACTGCTTATATA	2810408M09Rik_CCDS17082.1_ex0_2:165491655-165491677:-_5-1	2810408M09Rik	7.07368	6.4415	5.92616	1.09814	1.19364
89801	CCACGGAAGACGCGCGCCT	2810408M09Rik_CCDS17082.1_ex1_2:165493180-165493202:+_5-5	2810408M09Rik	1	1	1	1	1
1516	CGGCGGCGGACAGTGCAGG	2810408M09Rik_CCDS17082.1_ex1_2:165493077-165493099:-_5-2	2810408M09Rik	17.2998	18.8188	15.9098	0.919282	1.08736
1519	GTGCTTCACCACGGCCGCG	2810408M09Rik_CCDS17082.1_ex1_2:165493146-165493168:+_5-4	2810408M09Rik	21.2043	30.5194	27.9297	0.69478	0.759202
1517	CCGAAGAGCTACCGGCACC	2810408M09Rik_CCDS17082.1_ex1_2:165493119-165493141:-_5-3	2810408M09Rik	4.53265	8.86621	6.18889	0.511228	0.732385
1521	AAGTGGCAAAAAGGCATCG	2810417H13Rik_CCDS23299.1_ex2_9:65893421-65893443:+_5-4	2810417H13Rik	5.36933	5.96219	5.33502	0.900563	1.00643
1522	TCCCCTAAAGAGTCTAAAA	2810417H13Rik_CCDS23299.1_ex2_9:65893457-65893479:+_5-5	2810417H13Rik	1.92964	2.35333	1.98523	0.819965	0.971999
1520	AAGTTCGTCGAGAAAAGGT	2810417H13Rik_CCDS23299.1_ex1_9:65890792-65890814:+_5-1	2810417H13Rik	7.87937	10.2195	8.98038	0.771011	0.877398
1524	TACCGGAGTGTCGTGCACG	2810428I15Rik_CCDS22370.1_ex2_8:70505890-70505912:-_5-2	2810428I15Rik	7.13565	4.63706	5.30218	1.53883	1.3458
1523	CGAGCACCGGTTGCGCTCG	2810428I15Rik_CCDS22370.1_ex2_8:70505805-70505827:+_5-1	2810428I15Rik	25.5736	22.5122	22.4781	1.13599	1.13771
1526	CTTCAGAATGAACGCGCAC	2810428I15Rik_CCDS22370.1_ex3_8:70506516-70506538:-_5-4	2810428I15Rik	9.8936	9.11996	9.21027	1.08483	1.07419
1527	GACGCCCCGATCGCTACAC	2810428I15Rik_CCDS22370.1_ex3_8:70506555-70506577:-_5-5	2810428I15Rik	9.70767	11.9676	11.542	0.811164	0.841075
1525	CGCTCACTGGTCTAGACGG	2810428I15Rik_CCDS22370.1_ex3_8:70506489-70506511:+_5-3	2810428I15Rik	14.5728	22.0893	16.9936	0.659722	0.857547
1530	TTTTCGTGCTGTGCCGCGT	2810459M11Rik_CCDS48302.1_ex0_1:86046257-86046279:+_5-3	2810459M11Rik	25.7285	16.5632	20.0478	1.55335	1.28336
1529	GGCGGCCACCGAGTCGCAC	2810459M11Rik_CCDS48302.1_ex0_1:86046192-86046214:+_5-2	2810459M11Rik	12.8685	11.4601	10.9508	1.12289	1.17511
1532	ACCAGCACTCCGACCAGCG	2810459M11Rik_CCDS48302.1_ex0_1:86046357-86046379:-_5-5	2810459M11Rik	24.0552	22.6532	22.7736	1.06189	1.05627
1531	GTCGGATCGCTGACCTCCC	2810459M11Rik_CCDS48302.1_ex0_1:86046274-86046296:+_5-4	2810459M11Rik	14.2939	20.3131	15.5814	0.70368	0.917368
1528	TCCGGCGGGAACACGGCAC	2810459M11Rik_CCDS48302.1_ex0_1:86046120-86046142:-_5-1	2810459M11Rik	8.84	13.913	12.8556	0.635378	0.687637
1537	TACTTTCGATTTGTAACAT	2810474O19Rik_CCDS20717.1_ex0_6:149327438-149327460:-_5-5	2810474O19Rik	1.55779	1.4793	1.75534	1.05305	0.887454
1533	ATCTCATAATCCCGACGGA	2810474O19Rik_CCDS20717.1_ex0_6:149325888-149325910:+_5-1	2810474O19Rik	18.6632	18.565	14.8589	1.00529	1.25603
1534	CTTGTAATGATGTAGTAGC	2810474O19Rik_CCDS20717.1_ex0_6:149326145-149326167:-_5-2	2810474O19Rik	4.47067	4.91901	4.21843	0.908857	1.0598
1535	AGAATCAGTACAACCGTAG	2810474O19Rik_CCDS20717.1_ex0_6:149326915-149326937:+_5-3	2810474O19Rik	1.06198	1.5075	1.26273	0.704463	0.841017
1536	CACAGCTCGGTATGAGAAC	2810474O19Rik_CCDS20717.1_ex0_6:149327033-149327055:-_5-4	2810474O19Rik	8.68506	12.8134	10.5568	0.677811	0.822702
1539	CAGGACTTCACGGAGACGC	2900011O08Rik_CCDS27971.1_ex1_16:14049456-14049478:-_5-2	2900011O08Rik	19.8718	12.5033	14.2021	1.58933	1.39921
1538	CATGGAGATGATGTCTAGC	2900011O08Rik_CCDS27971.1_ex1_16:14049384-14049406:-_5-1	2900011O08Rik	22.6297	15.4919	16.2054	1.46075	1.39643
1540	TTCTGACTCTCGACGGACC	2900011O08Rik_CCDS27971.1_ex1_16:14049474-14049496:-_5-3	2900011O08Rik	12.0628	8.44329	9.50584	1.42868	1.26899
1542	CGAGGTGGAACGCTTAAGG	2900011O08Rik_CCDS27971.1_ex3_16:14093985-14094007:+_5-5	2900011O08Rik	10.6373	7.62566	7.89663	1.39494	1.34707
1541	AGAACTTGGTCGCCATCCC	2900011O08Rik_CCDS27971.1_ex2_16:14088998-14089020:+_5-4	2900011O08Rik	20.4606	20.4259	20.5733	1.0017	0.994521
1543	GTGGACTCCAGCTCGGAAC	2900026A02Rik_CCDS39217.1_ex4_5:113097667-113097689:+_5-1	2900026A02Rik	13.7671	9.9094	10.0313	1.3893	1.37242
1546	GCAGACCAGCACCAGAACG	2900026A02Rik_CCDS39217.1_ex5_5:113101463-113101485:-_5-4	2900026A02Rik	12.4966	11.5447	10.721	1.08246	1.16562
1547	CGACAGCCAGTATGGGACC	2900026A02Rik_CCDS39217.1_ex5_5:113101485-113101507:-_5-5	2900026A02Rik	19.5309	19.6082	21.0659	0.996057	0.927134
1544	TATACCGAGTCCACGTCGG	2900026A02Rik_CCDS39217.1_ex4_5:113097738-113097760:-_5-2	2900026A02Rik	10.5753	11.742	11.2793	0.90064	0.937592
1545	GTCAGGAGACGGAGACTCG	2900026A02Rik_CCDS39217.1_ex4_5:113097810-113097832:+_5-3	2900026A02Rik	3.97486	4.66526	5.07229	0.852014	0.783642
1548	ATGCAAAGACTTACGTGCT	2900092C05Rik_CCDS20811.1_ex1_7:12512901-12512923:-_5-1	2900092C05Rik	4.25376	3.56568	4.38263	1.19297	0.970594
1550	CAGTAATTCCACGTAGGCC	2900092C05Rik_CCDS20811.1_ex3_7:12550480-12550502:+_5-4	2900092C05Rik	20.7395	18.2549	18.6357	1.1361	1.11289
90208	CAGAATTCGATACAAATAA	2900092C05Rik_CCDS20811.1_ex2_7:12515476-12515498:+_5-3	2900092C05Rik	1	1	1	1	1
1549	ATTCTGATGGCTTCACAGT	2900092C05Rik_CCDS20811.1_ex2_7:12515461-12515483:-_5-2	2900092C05Rik	16.804	19.58	17.6504	0.858219	0.952043
1551	TATACTTACTATATCACGT	2900092C05Rik_CCDS20811.1_ex3_7:12550571-12550593:-_5-5	2900092C05Rik	2.48743	3.22735	2.54353	0.770735	0.977944
1553	GCTTTCAACCAGTGCTGAG	3010026O09Rik_CCDS48784.1_ex4_11:50197041-50197063:+_5-2	3010026O09Rik	17.0829	13.8848	16.1726	1.23033	1.05629
1555	CTTACTTTCAGGACTCCAC	3010026O09Rik_CCDS48784.1_ex6_11:50199524-50199546:+_5-4	3010026O09Rik	20.9874	21.0743	21.7556	0.995873	0.96469
1554	GGAAATGGAATCAGCGCAC	3010026O09Rik_CCDS48784.1_ex5_11:50197617-50197639:+_5-3	3010026O09Rik	13.5502	13.631	12.6586	0.994069	1.07044
1556	GTTCGCAGTACTGAGGGCA	3010026O09Rik_CCDS48784.1_ex6_11:50199577-50199599:-_5-5	3010026O09Rik	13.5192	16.1403	14.9903	0.837604	0.901864
1552	TCAACCAACGGGACTCGAG	3010026O09Rik_CCDS48784.1_ex4_11:50196956-50196978:-_5-1	3010026O09Rik	6.82577	11.0936	9.40731	0.615292	0.725581
1558	TCGGGCTCTACACTCTTCG	3110001D03Rik_CCDS18288.1_ex1_4:75278074-75278096:-_5-2	3110001D03Rik	13.4572	7.37191	9.37447	1.82548	1.43552
1560	CCCTGAGTTAAAAACCTGC	3110001D03Rik_CCDS18288.1_ex1_4:75278111-75278133:-_5-4	3110001D03Rik	10.6683	7.4001	8.45492	1.44164	1.26179
1557	CTACGTCTATTTGGTGGCC	3110001D03Rik_CCDS18288.1_ex1_4:75278045-75278067:-_5-1	3110001D03Rik	41.2536	30.3503	35.4174	1.35925	1.16478
1559	GGAGTTGTCGCGTGCTGTC	3110001D03Rik_CCDS18288.1_ex1_4:75278091-75278113:-_5-3	3110001D03Rik	26.3483	23.0479	22.8722	1.1432	1.15198
1561	CACGGCGGATTTCGCGGGT	3110001D03Rik_CCDS18288.1_ex1_4:75278152-75278174:+_5-5	3110001D03Rik	19.345	17.8602	18.8655	1.08313	1.02541
1565	ACGTCCTAAAGCTGCAAGC	3110001I22Rik_CCDS37260.1_ex0_16:13677583-13677605:+_5-5	3110001I22Rik	8.15826	5.90581	6.12321	1.3814	1.33235
1564	TCACTGTGCCGTTTGTAGG	3110001I22Rik_CCDS37260.1_ex0_16:13677430-13677452:-_5-3	3110001I22Rik	33.4446	30.8859	31.9363	1.08284	1.04723
1563	CAAACTGCATTCTTCCCAT	3110001I22Rik_CCDS37260.1_ex0_16:13677376-13677398:+_5-2	3110001I22Rik	17.8885	16.8734	15.9098	1.06016	1.12437
89605	AAGTTTAAACAAACTCAAA	3110001I22Rik_CCDS37260.1_ex0_16:13677547-13677569:+_5-4	3110001I22Rik	1	1	1	1	1
1562	AAGCCAACAGCATGAGTGC	3110001I22Rik_CCDS37260.1_ex0_16:13677187-13677209:+_5-1	3110001I22Rik	12.4966	14.1949	14.3006	0.880357	0.87385
1568	CTGGTCGTTGTCCACCATC	3110002H16Rik_CCDS29063.1_ex8_18:12180741-12180763:+_5-3	3110002H16Rik	11.6909	10.6706	9.40731	1.09561	1.24275
1566	CGCAATGTCTCGTTCTGAA	3110002H16Rik_CCDS29063.1_ex6_18:12179560-12179582:-_5-1	3110002H16Rik	9.76965	9.06357	9.50584	1.0779	1.02775
1567	ACGTCTAACAGCACGGGAG	3110002H16Rik_CCDS29063.1_ex7_18:12180527-12180549:+_5-2	3110002H16Rik	13.3643	13.913	13.184	0.960561	1.01367
1569	TATTTGACATCAGGCTACG	3110002H16Rik_CCDS29063.1_ex9_18:12181593-12181615:+_5-4	3110002H16Rik	10.4824	13.6874	12.0018	0.76584	0.873403
1570	CAACCTTACGAGATCCCCC	3110002H16Rik_CCDS29063.1_ex9_18:12181670-12181692:+_5-5	3110002H16Rik	10.4824	14.5333	12.9542	0.721268	0.80919
1574	CGTATTTGTAATTTCTGAG	3110009E18Rik_CCDS15232.1_ex1_1:120160635-120160657:-_6-4	3110009E18Rik	6.42293	4.29873	4.87525	1.49414	1.31746
1575	CATCAAGCTCACAAAGCAA	3110009E18Rik_CCDS15232.1_ex2_1:120166151-120166173:+_6-5	3110009E18Rik	4.50166	3.53749	5.03945	1.27256	0.893284
1571	AACTTGCATCAAACTGTAA	3110009E18Rik_CCDS15232.1_ex0_1:120150701-120150723:+_6-1	3110009E18Rik	1.03099	1.02819	1.26273	1.00272	0.816476
1576	GACGACACACTCCTGCTAA	3110009E18Rik_CCDS15232.1_ex3_1:120171430-120171452:+_6-6	3110009E18Rik	12.1247	13.6592	12.7899	0.887659	0.947991
1572	TTATAATATTTCTAAAGCA	3110009E18Rik_CCDS15232.1_ex0_1:120150726-120150748:+_6-2	3110009E18Rik	1	1.16917	1.16421	0.855311	0.858955
1573	TGGCAGGCTGGTCCTCAAA	3110009E18Rik_CCDS15232.1_ex1_1:120160610-120160632:-_6-3	3110009E18Rik	7.97233	10.3605	9.93277	0.769493	0.802629
1581	TTTTGGTGGGATGCGCCCC	3110035E14Rik_CCDS14813.1_ex2_1:9613438-9613460:-_5-5	3110035E14Rik	23.9622	17.6064	22.5766	1.36099	1.06137
1580	ACCGCAGATGGTTGCAGAC	3110035E14Rik_CCDS14813.1_ex2_1:9613393-9613415:+_5-4	3110035E14Rik	9.08791	7.48469	7.17412	1.2142	1.26676
1577	CGACCTGTACCCGCCACCA	3110035E14Rik_CCDS14813.1_ex2_1:9613325-9613347:+_5-1	3110035E14Rik	25.7905	24.8242	26.4518	1.03893	0.975
1579	CCTCAACGCTGTGAGCGCA	3110035E14Rik_CCDS14813.1_ex2_1:9613362-9613384:+_5-3	3110035E14Rik	30.0979	31.6472	30.0972	0.951044	1.00002
1578	CGTTGAGGCAGTAGCTCCA	3110035E14Rik_CCDS14813.1_ex2_1:9613349-9613371:-_5-2	3110035E14Rik	7.56949	9.85301	10.918	0.768242	0.693303
1582	TCGGACGGAGGTGCTGCAA	3110040N11Rik_CCDS40010.1_ex1_7:81786155-81786177:+_5-1	3110040N11Rik	16.9589	10.6424	14.4977	1.59352	1.16977
1586	TAGCCATTCATGCCAAACC	3110040N11Rik_CCDS40010.1_ex2_7:81788473-81788495:-_5-5	3110040N11Rik	18.2294	12.1367	13.2497	1.502	1.37583
1585	CCTGTCACAGCGTTCTGTC	3110040N11Rik_CCDS40010.1_ex2_7:81788448-81788470:+_5-4	3110040N11Rik	15.0376	15.5483	17.946	0.967159	0.837938
1583	GCTGCAATGGCCACACCAA	3110040N11Rik_CCDS40010.1_ex1_7:81786167-81786189:+_5-2	3110040N11Rik	14.2629	21.1871	16.1397	0.673189	0.883715
1584	TTCCTAGATCTGAGCACTG	3110040N11Rik_CCDS40010.1_ex1_7:81786190-81786212:-_5-3	3110040N11Rik	12.9924	24.2603	15.8113	0.535543	0.821716
1590	ATTAATCTTCGACGGAAAC	3110043O21Rik_CCDS38708.1_ex9_4:35218549-35218571:-_5-4	3110043O21Rik	5.27637	3.42471	4.94093	1.54068	1.06789
1588	TAACACACATTATTCGAAA	3110043O21Rik_CCDS38708.1_ex9_4:35218433-35218455:-_5-2	3110043O21Rik	1.74372	1.16917	1.49262	1.49142	1.16823
1589	AACACACACTCTGTGAAGT	3110043O21Rik_CCDS38708.1_ex9_4:35218461-35218483:+_5-3	3110043O21Rik	5.02846	3.4529	4.54684	1.4563	1.10593
1587	ACTACAACGGAACAGCCAC	3110043O21Rik_CCDS38708.1_ex5_4:35211319-35211341:+_5-1	3110043O21Rik	23.8693	21.3845	23.9559	1.1162	0.996383
1591	TTGCCAACCACACTCTAAA	3110043O21Rik_CCDS38708.1_ex9_4:35218652-35218674:-_5-5	3110043O21Rik	7.25961	8.69704	8.15935	0.834722	0.889728
1596	CGAGGCAGCCATTCAAGTA	3110047P20Rik_CCDS51508.1_ex6_5:63805412-63805434:-_5-5	3110047P20Rik	11.8149	7.65385	9.14459	1.54365	1.29201
1595	AAACAAGTCACGAAGGTCG	3110047P20Rik_CCDS51508.1_ex6_5:63804541-63804563:-_5-4	3110047P20Rik	4.22277	2.9736	4.87525	1.42009	0.866165
1594	GTCCCCCATACACAACGAG	3110047P20Rik_CCDS51508.1_ex5_5:63800559-63800581:-_5-3	3110047P20Rik	8.43716	6.4133	7.69958	1.31557	1.09579
1593	CAAACTCATCCTCGATAGC	3110047P20Rik_CCDS51508.1_ex5_5:63800031-63800053:-_5-2	3110047P20Rik	14.9757	14.1385	13.7095	1.05921	1.09236
1592	ACCCGCCGGTCGCAGCGTC	3110047P20Rik_CCDS51508.1_ex0_5:63650273-63650295:+_5-1	3110047P20Rik	17.8266	17.6628	15.0231	1.00927	1.18661
1599	TGGTTTGATGAGTCAACAG	3110052M02Rik_CCDS49994.1_ex2_17:21661486-21661508:-_5-3	3110052M02Rik	7.60048	6.9208	7.33833	1.09821	1.03572
1600	GATGCTCCTATGTCTGCAT	3110052M02Rik_CCDS49994.1_ex2_17:21661505-21661527:-_5-4	3110052M02Rik	11.0092	10.2759	10.6224	1.07136	1.03641
1598	TGATGAACAGTATCACATG	3110052M02Rik_CCDS49994.1_ex2_17:21661324-21661346:-_5-2	3110052M02Rik	3.57202	4.97539	4.08706	0.717936	0.873982
1601	ATGTTTCAGTACCTCCTCA	3110052M02Rik_CCDS49994.1_ex2_17:21661732-21661754:+_5-5	3110052M02Rik	7.32158	11.2345	9.27595	0.651704	0.789308
1597	GTTCTCACCGACAGAGACC	3110052M02Rik_CCDS49994.1_ex1_17:21659026-21659048:-_5-1	3110052M02Rik	5.86514	9.62745	9.57152	0.60921	0.61277
1603	CGGGTAGTCACTTGAAACC	3110057O12Rik_CCDS38422.2_ex1_3:40905920-40905942:-_5-2	3110057O12Rik	2.73534	2.57888	3.26603	1.06067	0.83751
1602	CGAGAAAGGTGCCAGAACC	3110057O12Rik_CCDS38422.2_ex1_3:40905902-40905924:+_5-1	3110057O12Rik	6.51589	6.97719	7.89663	0.933885	0.825149
1606	GGCATGGAATCAACGGCAT	3110057O12Rik_CCDS38422.2_ex7_3:40930170-40930192:-_5-5	3110057O12Rik	3.63399	4.27054	3.82433	0.850945	0.950229
1605	CAGTTGGACACTGCTAAGG	3110057O12Rik_CCDS38422.2_ex7_3:40930141-40930163:-_5-4	3110057O12Rik	4.43969	6.04678	5.92616	0.734223	0.749167
1604	TACCCGGTACACATCGATA	3110057O12Rik_CCDS38422.2_ex1_3:40905935-40905957:+_5-3	3110057O12Rik	2.08459	3.08638	2.44501	0.675415	0.852589
1608	AAATGGTAGACGTGGCACT	3110062M04Rik_CCDS19997.1_ex1_6:34875550-34875572:-_5-2	3110062M04Rik	11.6599	11.6574	11.9361	1.00021	0.976864
1607	GACAGATGTTACCTCAATC	3110062M04Rik_CCDS19997.1_ex1_6:34875524-34875546:+_5-1	3110062M04Rik	3.01423	3.05818	2.64205	0.985628	1.14087
1609	AGTACACGGTCTCCGTGGC	3110062M04Rik_CCDS19997.1_ex1_6:34875586-34875608:+_5-3	3110062M04Rik	9.6457	10.3605	9.83425	0.931006	0.980827
1611	AGGAAGCAGACAGCCGCCT	3110062M04Rik_CCDS19997.1_ex2_6:34876564-34876586:-_5-5	3110062M04Rik	18.1055	21.6946	21.5257	0.83456	0.84111
1610	CCGCCTGGGCCCAGAGAGT	3110062M04Rik_CCDS19997.1_ex2_6:34876551-34876573:-_5-4	3110062M04Rik	5.02846	6.58247	6.45162	0.763917	0.779411
1612	TCAATAGGCTCGTTCCACA	3110079O15Rik_CCDS48305.1_ex1_1:87475050-87475072:-_5-1	3110079O15Rik	16.8659	11.7138	12.2973	1.43983	1.37151
1613	CACCAGAGGGCAATTCAAT	3110079O15Rik_CCDS48305.1_ex1_1:87475064-87475086:-_5-2	3110079O15Rik	5.80316	5.68025	7.33833	1.02164	0.790802
1614	CCAGGGGACCTTCACCAGA	3110079O15Rik_CCDS48305.1_ex1_1:87475076-87475098:-_5-3	3110079O15Rik	12.5896	13.2927	13.0527	0.947103	0.96452
1616	CCTCCATCCTGGTCCACCC	3110079O15Rik_CCDS48305.1_ex1_1:87475185-87475207:-_5-5	3110079O15Rik	21.4522	30.0401	29.0463	0.714118	0.738552
1615	GAGCAGAGGTGGGGAACGG	3110079O15Rik_CCDS48305.1_ex1_1:87475136-87475158:-_5-4	3110079O15Rik	2.98324	5.14456	3.85717	0.579883	0.773427
1621	GAGACGCCGAGGACATCGG	3110082I17Rik_CCDS51684.1_ex3_5:139455449-139455471:-_5-5	3110082I17Rik	9.39779	9.31732	9.76857	1.00864	0.962044
1619	GCTGCTACACAGACTGCCA	3110082I17Rik_CCDS51684.1_ex2_5:139364031-139364053:-_5-3	3110082I17Rik	6.79478	8.13316	8.29072	0.835443	0.819565
1618	GCTGGCAGCGTCTGAACCT	3110082I17Rik_CCDS51684.1_ex2_5:139364014-139364036:+_5-2	3110082I17Rik	17.2378	22.1175	20.3434	0.779373	0.847341
1617	GAGCCAGGGTGGCAGCCGA	3110082I17Rik_CCDS51684.1_ex2_5:139363988-139364010:+_5-1	3110082I17Rik	10.3894	13.4619	13.8737	0.771765	0.748857
1620	CTCCTCTGGGGACAACTCA	3110082I17Rik_CCDS51684.1_ex2_5:139364127-139364149:+_5-4	3110082I17Rik	6.45392	8.61246	8.42208	0.74937	0.766309
1625	TGCGCGGGACTGGCCGTCG	3110082J24Rik_CCDS57333.1_ex1_5:30105234-30105256:+_5-4	3110082J24Rik	32.515	18.2549	19.8836	1.78116	1.63526
1624	CGCGCAGCCCGAGCTGCGC	3110082J24Rik_CCDS57333.1_ex1_5:30105220-30105242:+_5-3	3110082J24Rik	3.63399	2.91721	3.98854	1.24571	0.911109
1622	GGGGCTGATGCCCCGTGGA	3110082J24Rik_CCDS57333.1_ex1_5:30105119-30105141:+_5-1	3110082J24Rik	7.32158	6.35692	7.17412	1.15175	1.02055
1626	GTCCCGGGACGGCGAACCC	3110082J24Rik_CCDS57333.1_ex1_5:30105255-30105277:+_5-5	3110082J24Rik	8.62309	7.85121	9.01322	1.09831	0.956715
1623	CTGAGCCTCGGGAGTCACG	3110082J24Rik_CCDS57333.1_ex1_5:30105149-30105171:-_5-2	3110082J24Rik	15.4715	20.9334	18.7999	0.739082	0.822957
1629	ATTATATTTAGGCTACAGT	3300002I08Rik_CCDS50740.1_ex1_2:150344359-150344381:-_4-2	3300002I08Rik	9.21186	8.02038	9.27595	1.14856	0.993091
1627	TGTTTTCCCACCCAGGTCG	3300002I08Rik_CCDS50740.1_ex0_2:150311212-150311234:-_4-1	3300002I08Rik	23.3734	23.8938	23.2662	0.978224	1.00461
1632	CCTCAGGTGAAGCGGAGTA	3425401B19Rik_CCDS49437.1_ex0_14:32662863-32662885:-_5-3	3425401B19Rik	17.1448	13.6874	16.3696	1.2526	1.04736
1630	TCTGAAATGGGACCGGCTA	3425401B19Rik_CCDS49437.1_ex0_14:32662026-32662048:-_5-1	3425401B19Rik	16.804	14.9562	16.7637	1.12355	1.0024
1631	TGGGGTCACCCTTCCCGAT	3425401B19Rik_CCDS49437.1_ex0_14:32662357-32662379:-_5-2	3425401B19Rik	19.8098	18.6778	18.0445	1.06061	1.09783
1633	GTGTCGGGGACTTTTCACC	3425401B19Rik_CCDS49437.1_ex0_14:32663799-32663821:-_5-4	3425401B19Rik	26.1934	26.8542	27.1743	0.975393	0.963901
1634	CGAAGTCTGTGCATCTCGG	3425401B19Rik_CCDS49437.1_ex0_14:32663874-32663896:-_5-5	3425401B19Rik	19.6239	20.877	18.143	0.939977	1.08162
1639	GCTTGACATCCTGTAGCCA	3632451O06Rik_CCDS36903.1_ex6_14:49774108-49774130:+_5-5	3632451O06Rik	11.35	7.31552	7.83094	1.5515	1.44938
1636	GACTGCTGCTACAATAGGC	3632451O06Rik_CCDS36903.1_ex6_14:49773666-49773688:+_5-2	3632451O06Rik	5.43131	3.65026	5.72911	1.48792	0.948018
1637	ACTGTTATAGGGTCCCTCC	3632451O06Rik_CCDS36903.1_ex6_14:49773696-49773718:+_5-3	3632451O06Rik	4.47067	5.03178	4.84241	0.888487	0.923234
1638	GTCCTTCAGATAGTACCAT	3632451O06Rik_CCDS36903.1_ex6_14:49773950-49773972:+_5-4	3632451O06Rik	7.69344	10.0222	10.2283	0.767642	0.752169
1635	GGAACGACAGTAGTTCCCA	3632451O06Rik_CCDS36903.1_ex6_14:49773505-49773527:+_5-1	3632451O06Rik	6.94973	9.96578	9.57152	0.697359	0.726084
1640	CACATAAAAAGAAAACGCA	3830403N18Rik_CCDS30141.1_ex3_X:56147095-56147117:+_5-3	3830403N18Rik	3.10719	3.02999	3.49592	1.02548	0.888806
1641	CTTTGGAAAACGAACAAAC	3830403N18Rik_CCDS30141.1_ex3_X:56147167-56147189:+_5-4	3830403N18Rik	3.3551	4.10137	2.60921	0.818043	1.28587
1643	CTTCTAGAAGCAGTCTCAG	3830406C13Rik_CCDS26817.1_ex1_14:12287353-12287375:-_7-3	3830406C13Rik	6.94973	5.96219	7.0756	1.16563	0.98221
1642	TGGAGATGAAAACACAGAA	3830406C13Rik_CCDS26817.1_ex1_14:12287314-12287336:+_7-2	3830406C13Rik	2.14656	2.09958	3.03615	1.02238	0.707002
90046	AGAAAATGAAAAACAAATT	3830406C13Rik_CCDS26817.1_ex1_14:12287295-12287317:+_7-1	3830406C13Rik	1	1	1	1	1
1644	AATTACCTTCAAGAGTCGG	3830406C13Rik_CCDS26817.1_ex1_14:12287378-12287400:-_7-4	3830406C13Rik	29.0753	36.6094	31.1153	0.794203	0.934437
1646	TGTGGGTGTGGGATAAGCT	3830406C13Rik_CCDS26817.1_ex2_14:12297613-12297635:-_7-6	3830406C13Rik	7.25961	9.17634	8.38924	0.791122	0.865347
1647	CCTCAAGAGAAAGCATCGA	3830406C13Rik_CCDS26817.1_ex2_14:12297636-12297658:-_7-7	3830406C13Rik	2.14656	2.77624	2.51069	0.77319	0.854969
1645	CAGGACATAGATGCTGCAG	3830406C13Rik_CCDS26817.1_ex2_14:12297578-12297600:+_7-5	3830406C13Rik	3.32411	4.35512	4.71104	0.763265	0.7056
1652	CCTATGACGGGATGCTACA	3830417A13Rik_CCDS30166.1_ex0_X:64177954-64177976:+_5-5	3830417A13Rik	7.07368	6.07497	5.63059	1.1644	1.25629
1648	AAATAGAACCCATGGCAGT	3830417A13Rik_CCDS30166.1_ex0_X:64177639-64177661:-_5-1	3830417A13Rik	6.39194	6.24414	6.18889	1.02367	1.03281
1650	CCTTCGAAACTTAACAAGC	3830417A13Rik_CCDS30166.1_ex0_X:64177758-64177780:-_5-3	3830417A13Rik	8.5921	9.03537	8.22504	0.95094	1.04463
1649	CTTTTCATTTAGTCCATCC	3830417A13Rik_CCDS30166.1_ex0_X:64177716-64177738:-_5-2	3830417A13Rik	4.99747	5.25734	5.13798	0.950571	0.972654
1651	TGCTCCTCATAATCTCCCA	3830417A13Rik_CCDS30166.1_ex0_X:64177817-64177839:-_5-4	3830417A13Rik	8.00332	9.11996	9.24311	0.877562	0.865869
1655	GTTGCGTTGAGTCGGCCGA	4430402I18Rik_CCDS37948.1_ex5_19:28944280-28944302:+_5-3	4430402I18Rik	35.6757	22.3995	29.2105	1.59271	1.22133
1653	AGCCTGGAGGCGAACATAA	4430402I18Rik_CCDS37948.1_ex3_19:28939134-28939156:-_5-1	4430402I18Rik	9.42878	8.80982	9.11175	1.07026	1.03479
1657	TCACACCTTGGCATGCAGA	4430402I18Rik_CCDS37948.1_ex7_19:28948651-28948673:-_5-5	4430402I18Rik	18.2604	17.7474	19.5552	1.02891	0.933787
1656	ACGTTGAGGGGAGGGTAAC	4430402I18Rik_CCDS37948.1_ex5_19:28944310-28944332:+_5-4	4430402I18Rik	5.61724	6.27233	5.56491	0.895558	1.0094
1654	CCAAATTATTTTCACCAAA	4430402I18Rik_CCDS37948.1_ex4_19:28941777-28941799:+_5-2	4430402I18Rik	6.4849	10.4169	8.09367	0.622537	0.801231
1660	GATAGAGAAGTTACCGTGG	4632428N05Rik_CCDS35912.1_ex1_10:60358128-60358150:-_5-3	4632428N05Rik	7.87937	5.87761	7.30549	1.34057	1.07856
1661	TATCACTAGACAGCAGTAG	4632428N05Rik_CCDS35912.1_ex1_10:60358182-60358204:-_5-4	4632428N05Rik	5.24538	4.38331	1.59114	1.19667	3.29662
1659	CGTGGTACCTCAGCTCACG	4632428N05Rik_CCDS35912.1_ex1_10:60357970-60357992:+_5-2	4632428N05Rik	7.2906	7.31552	8.3564	0.996593	0.872456
1662	GTAGAACCGTTGTTCTGGG	4632428N05Rik_CCDS35912.1_ex1_10:60358218-60358240:-_5-5	4632428N05Rik	10.2345	10.7834	10.7866	0.949093	0.94881
1658	ATCGTGCCCTTTGGACACG	4632428N05Rik_CCDS35912.1_ex1_10:60357933-60357955:-_5-1	4632428N05Rik	16.3391	19.1289	16.5338	0.854159	0.988225
1664	GTAACATGCGATATCATAC	4632434I11Rik_CCDS40022.1_ex0_7:92859613-92859635:+_5-2	4632434I11Rik	4.6566	3.25554	3.9557	1.43036	1.17719
1665	TCTAAATTATGTTCCTCGA	4632434I11Rik_CCDS40022.1_ex0_7:92859668-92859690:+_5-3	4632434I11Rik	5.15241	3.76304	5.7948	1.36922	0.889145
1663	GGTAGATCATCCCAAATCA	4632434I11Rik_CCDS40022.1_ex0_7:92859482-92859504:+_5-1	4632434I11Rik	11.8149	10.2477	11.0494	1.15293	1.06928
1666	TTTTGGTTAGGAGTACCAC	4632434I11Rik_CCDS40022.1_ex0_7:92859899-92859921:+_5-4	4632434I11Rik	4.50166	4.97539	4.94093	0.904785	0.911096
1667	TACGGCCACTGGTTTACAC	4632434I11Rik_CCDS40022.1_ex2_7:92862324-92862346:-_5-5	4632434I11Rik	5.05945	5.73664	5.69627	0.881953	0.888203
1672	GCGGGAAGAGTTTCGGAGG	4732456N10Rik_CCDS27855.1_ex8_15:101562686-101562708:-_5-5	4732456N10Rik	34.3742	26.4312	22.8065	1.30052	1.50721
1669	CTCCAGCGGGTTCGAAAGG	4732456N10Rik_CCDS27855.1_ex8_15:101562399-101562421:-_5-2	4732456N10Rik	22.7227	20.736	18.7013	1.09581	1.21503
1668	ATGGGCTCTAGATTGGTCC	4732456N10Rik_CCDS27855.1_ex7_15:101560533-101560555:+_5-1	4732456N10Rik	20.6465	21.6946	23.2006	0.951688	0.889913
1671	GTCTGGGTGTCAGCGGCAT	4732456N10Rik_CCDS27855.1_ex8_15:101562551-101562573:-_5-4	4732456N10Rik	39.6112	43.1223	42.3798	0.91858	0.934674
1670	GCGGCATAGGATACAGAGT	4732456N10Rik_CCDS27855.1_ex8_15:101562539-101562561:-_5-3	4732456N10Rik	2.23953	4.52429	4.28411	0.495001	0.522752
1676	CAAGGTACGTTGGCATGCG	4833403I15Rik_CCDS50284.1_ex2_18:46866460-46866482:-_5-4	4833403I15Rik	15.3165	9.62745	12.9213	1.59092	1.18537
1674	ATGTTCACGCGACCCGTGA	4833403I15Rik_CCDS50284.1_ex0_18:46850559-46850581:-_5-2	4833403I15Rik	11.7529	10.868	14.0707	1.08142	0.835271
1673	AGACTTGGGACCTCCGTCG	4833403I15Rik_CCDS50284.1_ex0_18:46850433-46850455:+_5-1	4833403I15Rik	3.26214	3.19915	3.72581	1.01969	0.875551
1675	GCCCTGGTAGCGACTCAAA	4833403I15Rik_CCDS50284.1_ex1_18:46864673-46864695:+_5-3	4833403I15Rik	4.50166	4.52429	4.21843	0.994999	1.06714
1677	CGATTCGTCAAATATCAAC	4833403I15Rik_CCDS50284.1_ex4_18:46876932-46876954:-_5-5	4833403I15Rik	5.80316	7.14636	6.68151	0.812045	0.868541
1678	ATGTACTCGGAGAGTGGCG	4833420G17Rik_CCDS49373.1_ex2_13:119469574-119469596:+_5-1	4833420G17Rik	6.88775	4.41151	6.78003	1.56131	1.01589
1679	AAGGTACGCGTGTCCATCC	4833420G17Rik_CCDS49373.1_ex2_13:119469610-119469632:-_5-2	4833420G17Rik	13.7671	10.8116	13.0198	1.27336	1.0574
1680	GTGTACGCATGGGTAAAGC	4833420G17Rik_CCDS49373.1_ex2_13:119469928-119469950:+_5-3	4833420G17Rik	13.0544	11.6011	11.9032	1.12528	1.09671
1682	AGTCACAATGCTACTCGCA	4833420G17Rik_CCDS49373.1_ex2_13:119470054-119470076:-_5-5	4833420G17Rik	10.4204	9.57106	7.40401	1.08874	1.4074
1681	TGCCGCCTGTCCAGAGGCG	4833420G17Rik_CCDS49373.1_ex2_13:119469960-119469982:+_5-4	4833420G17Rik	11.381	12.1931	11.4435	0.933397	0.994545
1684	GGCAAATGGCAAGGGCAAC	4833423E24Rik_CCDS38168.1_ex11_2:85518596-85518618:-_5-3	4833423E24Rik	10.1725	7.45649	8.25788	1.36425	1.23185
1687	TACAAATTTGTGCATCAGA	4833423E24Rik_CCDS38168.1_ex8_2:85500226-85500248:+_5-1	4833423E24Rik	9.27384	7.71024	9.01322	1.20279	1.02891
1683	CAAGCATCCAGGTGGACGT	4833423E24Rik_CCDS38168.1_ex11_2:85518461-85518483:-_5-2	4833423E24Rik	10.4824	9.45829	11.0822	1.10827	0.945874
1685	GTGGAGGTCTATGAAAAGC	4833423E24Rik_CCDS38168.1_ex11_2:85518619-85518641:-_5-4	4833423E24Rik	8.0653	13.631	11.2793	0.591686	0.715056
1686	ATGGGAATCCGACAGCAAA	4833423E24Rik_CCDS38168.1_ex11_2:85518645-85518667:-_5-5	4833423E24Rik	22.7847	40.3028	26.6489	0.565337	0.854996
1691	CAACAATCTCCAGTTAAAA	4833424O15Rik_CCDS17796.1_ex1_3:117621039-117621061:-_5-4	4833424O15Rik	3.20016	1.81763	2.47785	1.76062	1.29151
1690	CCGGTGCTCCTCTACTCGC	4833424O15Rik_CCDS17796.1_ex0_3:117575887-117575909:+_5-3	4833424O15Rik	38.7746	28.9405	37.585	1.3398	1.03165
1689	CCCGGGTAGGGCTTACGGT	4833424O15Rik_CCDS17796.1_ex0_3:117575841-117575863:-_5-2	4833424O15Rik	19.4689	15.1817	16.501	1.28239	1.17987
1692	GACGGTTCGGCGTACCAGT	4833424O15Rik_CCDS17796.1_ex1_3:117621070-117621092:-_5-5	4833424O15Rik	11.5979	10.1631	11.0494	1.14118	1.04965
1688	CGTTCACTGTGAACGTGCA	4833424O15Rik_CCDS17796.1_ex0_3:117575798-117575820:+_5-1	4833424O15Rik	12.8995	11.5447	12.4287	1.11735	1.03788
1697	GCTAAGCAGTTTTGGCTCG	4833427G06Rik_CCDS40628.1_ex5_9:51101841-51101863:-_5-5	4833427G06Rik	16.2152	13.4901	14.1036	1.20201	1.14972
1694	ACTTACTGTCCTGATCAAA	4833427G06Rik_CCDS40628.1_ex4_9:51101047-51101069:+_5-2	4833427G06Rik	3.94387	4.63706	4.61252	0.850511	0.855037
1695	CTTTAGAGTTCCGCGCCAC	4833427G06Rik_CCDS40628.1_ex5_9:51101756-51101778:+_5-3	4833427G06Rik	10.8542	12.898	11.3449	0.841545	0.956747
1696	GATTCGGTAGTGGGGTACA	4833427G06Rik_CCDS40628.1_ex5_9:51101815-51101837:+_5-4	4833427G06Rik	6.70182	8.9226	7.89663	0.751107	0.848694
1693	TATCTTTGCTAAAGCCCAA	4833427G06Rik_CCDS40628.1_ex3_9:51100039-51100061:-_5-1	4833427G06Rik	4.19178	8.58426	7.17412	0.48831	0.584292
1702	CTCCTCCTCCATCGGACAT	4833439L19Rik_CCDS26529.1_ex5_13:54561748-54561770:-_5-5	4833439L19Rik	15.8123	12.1086	12.2316	1.30588	1.29274
1701	AAGTATCAGCATCTTGACA	4833439L19Rik_CCDS26529.1_ex5_13:54561692-54561714:-_5-4	4833439L19Rik	8.62309	7.23094	9.73573	1.19253	0.885716
1698	TGGTGTGAGGATTCGGAGC	4833439L19Rik_CCDS26529.1_ex1_13:54552981-54553003:+_5-1	4833439L19Rik	16.5561	16.1685	14.5962	1.02397	1.13427
1700	GGGCGCTTACTTGTGATCA	4833439L19Rik_CCDS26529.1_ex4_13:54559187-54559209:+_5-3	4833439L19Rik	14.5728	14.7306	13.7095	0.989287	1.06297
1699	CATAAGGGCCTTACCACGG	4833439L19Rik_CCDS26529.1_ex3_13:54556562-54556584:-_5-2	4833439L19Rik	11.2571	11.883	10.294	0.947327	1.09355
1705	ATCTTGCTGCTAGCCTGAC	4921501E09Rik_CCDS28624.1_ex0_17:33067317-33067339:+_5-3	4921501E09Rik	16.0293	12.1086	13.5781	1.3238	1.18052
1703	CCCTTAACTACATGGTACC	4921501E09Rik_CCDS28624.1_ex0_17:33067041-33067063:+_5-1	4921501E09Rik	6.51589	5.79303	6.12321	1.12478	1.06413
1704	GGCCATAAGTTTTCAACCC	4921501E09Rik_CCDS28624.1_ex0_17:33067164-33067186:+_5-2	4921501E09Rik	10.0485	9.20454	8.48776	1.09169	1.18389
1707	ACTGGCATGGATCGCCTAG	4921501E09Rik_CCDS28624.1_ex0_17:33067615-33067637:-_5-5	4921501E09Rik	16.3081	17.9448	18.1759	0.908797	0.897241
1706	AGGGCATGATGCTCTCAAG	4921501E09Rik_CCDS28624.1_ex0_17:33067596-33067618:-_5-4	4921501E09Rik	21.4212	25.5008	21.7556	0.840019	0.984631
1711	AAAGATTTGACTCAATCCA	4921504E06Rik_CCDS15716.1_ex15_2:19542389-19542411:-_5-4	4921504E06Rik	7.5385	6.10317	7.04276	1.23518	1.07039
1712	GCGGGCAGGTCACCTGGAA	4921504E06Rik_CCDS15716.1_ex16_2:19553760-19553782:+_5-5	4921504E06Rik	10.8232	9.20454	10.9508	1.17586	0.988348
1709	ATGCCATAGCTATTATCAA	4921504E06Rik_CCDS15716.1_ex13_2:19533772-19533794:-_5-2	4921504E06Rik	1.24791	1.08458	1.03284	1.15059	1.20823
1708	TTGAATAGTTCGCTGATCC	4921504E06Rik_CCDS15716.1_ex10_2:19516257-19516279:+_5-1	4921504E06Rik	12.1557	11.2345	12.9213	1.082	0.940751
1710	ATTATTACATCACTTCACG	4921504E06Rik_CCDS15716.1_ex14_2:19540391-19540413:-_5-3	4921504E06Rik	3.3551	3.53749	4.21843	0.948442	0.795344
1714	CACGGGCGATTCTTGCGCG	4921506M07Rik_CCDS25927.1_ex0_12:57576332-57576354:-_5-2	4921506M07Rik	23.0016	20.9898	21.6899	1.09585	1.06048
1716	CGATATTGACGACAGCGCG	4921506M07Rik_CCDS25927.1_ex0_12:57576409-57576431:+_5-4	4921506M07Rik	16.2462	14.9844	15.0888	1.08421	1.0767
1713	TCCCGCGGACTGAACCGCT	4921506M07Rik_CCDS25927.1_ex0_12:57576136-57576158:-_5-1	4921506M07Rik	12.2487	12.5597	14.2021	0.975241	0.862456
1717	CCATCGCACGAGATCGCGC	4921506M07Rik_CCDS25927.1_ex0_12:57576461-57576483:-_5-5	4921506M07Rik	36.9463	41.628	39.5883	0.887534	0.933263
1715	GCTCGACGTAACCCACACC	4921506M07Rik_CCDS25927.1_ex0_12:57576352-57576374:+_5-3	4921506M07Rik	9.8936	12.1086	9.24311	0.817076	1.07038
1720	CCGACCTTTACATCGCCTA	4921507P07Rik_CCDS20132.1_ex4_6:50584436-50584458:-_5-3	4921507P07Rik	19.438	8.75343	11.6077	2.22061	1.67458
1718	CCTCCTACGGTGCCAACCA	4921507P07Rik_CCDS20132.1_ex4_6:50584373-50584395:-_5-1	4921507P07Rik	5.36933	5.08817	5.86048	1.05526	0.916193
1721	CCCGCCAAATCCGTAATGC	4921507P07Rik_CCDS20132.1_ex7_6:50591650-50591672:+_5-4	4921507P07Rik	37.1012	42.2764	33.447	0.877586	1.10925
1722	CGGCCTGTGTTCTTCGGGA	4921507P07Rik_CCDS20132.1_ex7_6:50591707-50591729:+_5-5	4921507P07Rik	18.3224	22.3713	21.0002	0.819014	0.872485
1719	TGGGTACGAGCTTTAATGC	4921507P07Rik_CCDS20132.1_ex4_6:50584404-50584426:+_5-2	4921507P07Rik	8.71605	11.2627	9.93277	0.773885	0.877504
1723	GATTCATTGGGCAAACTGA	4921509C19Rik_CCDS38271.1_ex1_2:151472614-151472636:+_3-1	4921509C19Rik	5.80316	4.91901	3.75865	1.17974	1.54395
1725	CCCAAATGTTCCTTGGCCA	4921509C19Rik_CCDS38271.1_ex1_2:151473648-151473670:+_3-3	4921509C19Rik	13.5192	12.024	13.6438	1.12436	0.990868
1724	TTCAATTTCGGGTTGGACA	4921509C19Rik_CCDS38271.1_ex1_2:151473549-151473571:+_3-2	4921509C19Rik	12.9614	11.8266	12.5272	1.09595	1.03466
1728	ATTTAGGCGAATCAGTGAC	4921511H03Rik_CCDS19078.1_ex0_5:7305058-7305080:+_5-3	4921511H03Rik	6.32996	5.11637	5.33502	1.2372	1.18649
1726	GGTGCAGGTAATTGGTACG	4921511H03Rik_CCDS19078.1_ex0_5:7304896-7304918:-_5-1	4921511H03Rik	10.6683	9.79662	11.8047	1.08898	0.903733
1730	GTCATCTAGGTACAAAACG	4921511H03Rik_CCDS19078.1_ex0_5:7305279-7305301:-_5-5	4921511H03Rik	3.8819	3.62207	4.44831	1.07174	0.872668
1729	ATCCGGAAGAGTGTGCCAT	4921511H03Rik_CCDS19078.1_ex0_5:7305128-7305150:-_5-4	4921511H03Rik	14.2629	13.3209	15.68	1.07072	0.909628
1727	TTCTAGTGGGCTACATACA	4921511H03Rik_CCDS19078.1_ex0_5:7304971-7304993:+_5-2	4921511H03Rik	13.5812	13.9412	13.7752	0.974178	0.985918
1733	GGAGGAGGGATACCGGCCT	4921517D22Rik_CCDS36688.1_ex1_13:59690621-59690643:+_5-3	4921517D22Rik	12.8685	9.99398	12.166	1.28762	1.05774
1731	CTTCGTAGAACAGCCTGCC	4921517D22Rik_CCDS36688.1_ex1_13:59690481-59690503:+_5-1	4921517D22Rik	23.4354	20.877	22.2482	1.12255	1.05336
1735	CCTCAGTCTGTATGACCAC	4921517D22Rik_CCDS36688.1_ex1_13:59690754-59690776:+_5-5	4921517D22Rik	14.4179	14.787	13.4468	0.975036	1.07222
1732	GAAAGTCGAGTATAGGAGG	4921517D22Rik_CCDS36688.1_ex1_13:59690607-59690629:+_5-2	4921517D22Rik	5.12142	5.28553	4.21843	0.968952	1.21406
1734	TACATTGCTCCATTGGATC	4921517D22Rik_CCDS36688.1_ex1_13:59690668-59690690:-_5-4	4921517D22Rik	2.70435	6.80802	3.98854	0.39723	0.67803
1740	CTAATAAATATGTAACCAC	4921524J17Rik_CCDS22498.1_ex2_8:85426909-85426931:+_5-5	4921524J17Rik	2.64237	2.04319	3.46308	1.29326	0.763012
1737	CATACAGAAAACAAGCACG	4921524J17Rik_CCDS22498.1_ex1_8:85412281-85412303:-_5-2	4921524J17Rik	2.51842	2.18416	2.57637	1.15304	0.977506
1739	AGAAATCACCGCCGTCTAC	4921524J17Rik_CCDS22498.1_ex2_8:85426859-85426881:-_5-4	4921524J17Rik	13.4263	14.6178	15.9427	0.918484	0.842157
1738	TTTCACAATTACCTGTAGA	4921524J17Rik_CCDS22498.1_ex2_8:85426847-85426869:+_5-3	4921524J17Rik	2.70435	3.17096	3.26603	0.852848	0.828022
1736	TCGTCTGATATGATCTGAA	4921524J17Rik_CCDS22498.1_ex1_8:85412164-85412186:+_5-1	4921524J17Rik	4.53265	6.38511	5.2365	0.709878	0.865588
1741	TCTTAGGTGGAGGCAGCAC	4921524L21Rik_CCDS50216.1_ex4_18:6626316-6626338:+_5-1	4921524L21Rik	32.8558	27.6718	26.616	1.18734	1.23444
1744	TCATGTTCAAATCATGGGG	4921524L21Rik_CCDS50216.1_ex5_18:6629502-6629524:+_5-4	4921524L21Rik	3.97486	3.36832	2.93762	1.18007	1.35309
1743	GCTGCATCGTGGAGTCAGA	4921524L21Rik_CCDS50216.1_ex4_18:6626370-6626392:+_5-3	4921524L21Rik	19.252	18.2267	17.4862	1.05625	1.10098
1742	GGAGAACCGGGGGCGACAA	4921524L21Rik_CCDS50216.1_ex4_18:6626340-6626362:+_5-2	4921524L21Rik	11.3191	13.2363	12.1988	0.855151	0.927882
1745	TGGTGCTTCTTGTTAGATA	4921524L21Rik_CCDS50216.1_ex5_18:6629590-6629612:-_5-5	4921524L21Rik	7.38356	8.72524	8.38924	0.84623	0.880122
1749	CATCGAGGAGCGACGAGCC	4921530D09Rik_CCDS50533.1_ex7_2:25612144-25612166:-_5-2	4921530D09Rik	2.45644	2.09958	2.05091	1.16997	1.19773
1750	CACCAGATTATCCGCCAAC	4921530D09Rik_CCDS50533.1_ex9_2:25615498-25615520:-_5-3	4921530D09Rik	12.4966	14.4205	13.4468	0.866587	0.929339
1747	ATGGACGTATCCTTTCCGC	4921530D09Rik_CCDS50533.1_ex11_2:25616562-25616584:+_5-5	4921530D09Rik	23.5284	27.7	22.4781	0.849401	1.04673
1748	ACACGGCGGTACTTCTCGC	4921530D09Rik_CCDS50533.1_ex7_2:25612066-25612088:+_5-1	4921530D09Rik	10.5134	14.2231	12.0018	0.739174	0.875985
1746	TCAGGTTGGTTCCGTAAGC	4921530D09Rik_CCDS50533.1_ex10_2:25616175-25616197:+_5-4	4921530D09Rik	7.19763	10.5297	8.3564	0.683557	0.861332
1752	AACTGGTTGTCCATCCGAA	4921530L21Rik_CCDS27307.1_ex0_14:95882032-95882054:-_5-2	4921530L21Rik	11.9388	10.727	11.9032	1.11297	1.00299
1755	ACAACGCCTTGAGCACAGA	4921530L21Rik_CCDS27307.1_ex0_14:95882151-95882173:+_5-5	4921530L21Rik	14.2939	14.5615	13.4796	0.981627	1.06041
1754	GAGAACCCAAAACTGTCGG	4921530L21Rik_CCDS27307.1_ex0_14:95882123-95882145:+_5-4	4921530L21Rik	27.7428	28.9405	24.7769	0.958613	1.1197
1751	GCGTTGAGAGATGAAAACA	4921530L21Rik_CCDS27307.1_ex0_14:95881946-95881968:+_5-1	4921530L21Rik	2.14656	2.55069	2.67489	0.841563	0.802485
1753	GTTCTGCTGCCGTAGGATG	4921530L21Rik_CCDS27307.1_ex0_14:95882069-95882091:-_5-3	4921530L21Rik	25.6666	33.4798	28.2909	0.766628	0.907237
1759	CGGAAGTTCGAACCAGAAG	4921536K21Rik_CCDS24368.1_ex2_11:3894938-3894960:+_5-4	4921536K21Rik	8.00332	6.01858	7.17412	1.32977	1.11558
1758	CCAAGTTGTTATTCAGGTG	4921536K21Rik_CCDS24368.1_ex2_11:3894834-3894856:-_5-3	4921536K21Rik	12.9304	10.5297	12.363	1.228	1.0459
1757	AATAATCACCCGAGATAAA	4921536K21Rik_CCDS24368.1_ex1_11:3890077-3890099:+_5-2	4921536K21Rik	1.96063	1.67666	1.88671	1.16937	1.03918
1760	TGGGCTCGGATTACAGGAA	4921536K21Rik_CCDS24368.1_ex2_11:3894975-3894997:-_5-5	4921536K21Rik	3.63399	3.50929	4.57968	1.03553	0.793504
1756	GCACAGCGTATCTGCGAGA	4921536K21Rik_CCDS24368.1_ex1_11:3890041-3890063:-_5-1	4921536K21Rik	8.18925	8.21774	9.80141	0.996534	0.835518
1765	GGTGTTTAGACCAAAGCTG	4921539E11Rik_CCDS51247.1_ex3_4:103242856-103242878:+_5-5	4921539E11Rik	12.3727	9.03537	11.0494	1.36936	1.11976
1761	GGGGGAAATGCCCTCCAAA	4921539E11Rik_CCDS51247.1_ex1_4:103235791-103235813:-_5-1	4921539E11Rik	3.72696	2.88902	3.59444	1.29004	1.03687
1762	GAGTGGTCTGTAGAATGCA	4921539E11Rik_CCDS51247.1_ex2_4:103236951-103236973:+_5-2	4921539E11Rik	9.80064	9.03537	9.53868	1.0847	1.02746
1763	TAATTTGTGTACCTGTAAA	4921539E11Rik_CCDS51247.1_ex3_4:103242748-103242770:+_5-3	4921539E11Rik	1.55779	2.15597	1.95239	0.722547	0.797887
1764	GAATCCAATGCTAGTAAGA	4921539E11Rik_CCDS51247.1_ex3_4:103242785-103242807:-_5-4	4921539E11Rik	4.06783	5.73664	5.10513	0.709096	0.796811
1769	ACGTCTCTACCACCGAGTC	4922501C03Rik_CCDS52879.1_ex17_9:87231978-87232000:-_5-4	4922501C03Rik	17.2688	11.4601	12.6586	1.50686	1.3642
1767	ATGGTTTATTCGAAGCTGC	4922501C03Rik_CCDS52879.1_ex13_9:87222123-87222145:+_5-2	4922501C03Rik	10.3584	8.8944	9.21027	1.1646	1.12466
1768	GATCGATTCCTATGGGATC	4922501C03Rik_CCDS52879.1_ex16_9:87231401-87231423:-_5-3	4922501C03Rik	7.25961	6.949	8.45492	1.0447	0.858625
1766	AGCCTTTGGGATCCTACGG	4922501C03Rik_CCDS52879.1_ex12_9:87221303-87221325:-_5-1	4922501C03Rik	32.9178	32.4648	35.6145	1.01395	0.924281
1770	CATCTTCGGCTATCCACCA	4922501C03Rik_CCDS52879.1_ex24_9:87248389-87248411:+_5-5	4922501C03Rik	10.6373	13.2081	13.7095	0.805361	0.775909
1774	CCCGCCTAGGAGGCAAGAG	4922501L14Rik_CCDS51099.1_ex3_3:154727513-154727535:+_5-4	4922501L14Rik	15.0996	7.31552	10.294	2.06405	1.46683
1775	AGGACAACGCTGTTAAATA	4922501L14Rik_CCDS51099.1_ex4_3:154733605-154733627:+_5-5	4922501L14Rik	2.02261	1.53569	1.42693	1.31707	1.41745
1771	GAACCTTTGTGTCTACAAA	4922501L14Rik_CCDS51099.1_ex2_3:154720241-154720263:+_5-1	4922501L14Rik	4.06783	3.14277	3.06899	1.29435	1.32546
1773	CGGTGCTTGAACTCGCAGC	4922501L14Rik_CCDS51099.1_ex3_3:154727484-154727506:-_5-3	4922501L14Rik	27.8667	26.685	24.974	1.04428	1.11583
1772	CGCTTGGAGATAAACTGAA	4922501L14Rik_CCDS51099.1_ex3_3:154727397-154727419:-_5-2	4922501L14Rik	4.28474	7.9076	6.32025	0.541851	0.677939
1776	TTCATCGACAAAACTGAAG	4922502D21Rik_CCDS20583.1_ex2_6:129326655-129326677:-_5-1	4922502D21Rik	3.51004	1.90222	2.14944	1.84524	1.633
1778	TATCCAACATAAAAACTCG	4922502D21Rik_CCDS20583.1_ex2_6:129326725-129326747:-_5-3	4922502D21Rik	1.86767	1.19736	1.36125	1.55982	1.37202
1777	TGGAGTTCGCAGGTGTCGT	4922502D21Rik_CCDS20583.1_ex2_6:129326695-129326717:+_5-2	4922502D21Rik	18.9112	18.2549	18.5371	1.03595	1.02018
1780	CCCTTTGGACCCTGCTAGG	4922502D21Rik_CCDS20583.1_ex3_6:129330995-129331017:-_5-5	4922502D21Rik	16.3701	16.3377	15.8113	1.00199	1.03534
1779	AAAGCTGTGCCCTAAAGAC	4922502D21Rik_CCDS20583.1_ex2_6:129326776-129326798:-_5-4	4922502D21Rik	8.49913	11.1781	11.3778	0.760335	0.746994
1783	AAGACCCTCGGACCGAGCC	4922505E12Rik_CCDS15589.1_ex0_1:182748847-182748869:-_5-3	4922505E12Rik	1.74372	1.31014	1.29557	1.33094	1.34591
1785	GGCGCCGAGATCGAGACCG	4922505E12Rik_CCDS15589.1_ex0_1:182748969-182748991:-_5-5	4922505E12Rik	13.8601	10.5297	10.3925	1.31629	1.33366
1782	GCTTCCCGGATGTACTGCA	4922505E12Rik_CCDS15589.1_ex0_1:182748688-182748710:+_5-2	4922505E12Rik	63.1313	49.0149	52.1992	1.288	1.20943
1781	CGGTTACTCCTATTCTGGG	4922505E12Rik_CCDS15589.1_ex0_1:182748511-182748533:+_5-1	4922505E12Rik	25.7595	21.1025	25.598	1.22068	1.00631
1784	GGTCATATACCCACGCCGG	4922505E12Rik_CCDS15589.1_ex0_1:182748906-182748928:+_5-4	4922505E12Rik	23.4044	23.2453	27.0758	1.00685	0.864404
1789	CGATCAACCCCACGGTAAC	4930402F06Rik_CCDS38108.1_ex1_2:35380398-35380420:+_5-4	4930402F06Rik	13.3953	11.8266	12.7243	1.13264	1.05273
1790	TTGGTCCACACAATCGGAG	4930402F06Rik_CCDS38108.1_ex1_2:35380463-35380485:+_5-5	4930402F06Rik	9.80064	9.82481	9.57152	0.997539	1.02394
1786	TAAGATTAAGCAAGAGCGG	4930402F06Rik_CCDS38108.1_ex0_2:35376183-35376205:-_5-1	4930402F06Rik	4.6566	5.03178	3.72581	0.925438	1.24982
1787	GGTAGATCTGAGTCGCCAT	4930402F06Rik_CCDS38108.1_ex0_2:35376219-35376241:-_5-2	4930402F06Rik	14.5418	15.9148	13.7752	0.913731	1.05565
1788	CGACTTCTCCTATATGCCA	4930402F06Rik_CCDS38108.1_ex0_2:35376240-35376262:-_5-3	4930402F06Rik	14.077	18.2549	17.4205	0.771135	0.808069
1794	TTCGAGACTGTAGTAGGAT	4930402H24Rik_CCDS16750.1_ex32_2:130812865-130812887:-_5-4	4930402H24Rik	6.05107	4.49609	5.13798	1.34585	1.17771
1791	AGGACCAGTGTTGCGCACC	4930402H24Rik_CCDS16750.1_ex27_2:130791875-130791897:+_5-1	4930402H24Rik	15.8123	13.2363	15.3515	1.19462	1.03002
1792	GCGCTCAGGTTGTCCCGTG	4930402H24Rik_CCDS16750.1_ex27_2:130791927-130791949:+_5-2	4930402H24Rik	16.0912	13.8284	15.056	1.16364	1.06876
1795	GGTCAGGACACTTTGAACC	4930402H24Rik_CCDS16750.1_ex35_2:130822463-130822485:+_5-5	4930402H24Rik	6.98071	6.30053	6.71435	1.10796	1.03967
1793	GGCGGTGTTTGAGCATCAG	4930402H24Rik_CCDS16750.1_ex29_2:130798239-130798261:-_5-3	4930402H24Rik	14.3249	14.8152	14.7276	0.966906	0.972659
1799	CCGGATGCTGGAAAATAAG	4930402K13Rik_CCDS57728.1_ex0_X:9105161-9105183:+_5-4	4930402K13Rik	10.7923	5.73664	7.20696	1.88129	1.49748
1798	CCCATATGGTTCTACGTGG	4930402K13Rik_CCDS57728.1_ex0_X:9105034-9105056:-_5-3	4930402K13Rik	18.6942	16.2249	17.8475	1.15219	1.04744
1800	GCCATATTGGGAAGATCAC	4930402K13Rik_CCDS57728.1_ex0_X:9105182-9105204:+_5-5	4930402K13Rik	8.43716	8.86621	8.78333	0.951608	0.960587
1796	ACTATGGTAAGGAACGATC	4930402K13Rik_CCDS57728.1_ex0_X:9104836-9104858:+_5-1	4930402K13Rik	1.96063	2.09958	2.05091	0.933823	0.95598
1797	TGGCCGGACTGTCAAAAGC	4930402K13Rik_CCDS57728.1_ex0_X:9105012-9105034:-_5-2	4930402K13Rik	10.1105	13.6592	10.1955	0.740196	0.991665
1805	CAGAGAGGTTTGCAAACTG	4930404A10Rik_CCDS48798.1_ex5_11:54394721-54394743:-_5-5	4930404A10Rik	12.3417	7.37191	8.02799	1.67415	1.53733
1804	GATTGGGAGCATCCCAAGT	4930404A10Rik_CCDS48798.1_ex5_11:54394630-54394652:+_5-4	4930404A10Rik	7.19763	5.22914	5.99184	1.37645	1.20124
1803	ATCGCCAGAACTGTTCAGA	4930404A10Rik_CCDS48798.1_ex4_11:54390563-54390585:+_5-3	4930404A10Rik	5.43131	4.04498	5.86048	1.34273	0.926768
1801	ACTGAGCTTCAACCTGGCA	4930404A10Rik_CCDS48798.1_ex0_11:54370784-54370806:-_5-1	4930404A10Rik	27.5878	35.679	36.2056	0.773224	0.761976
1802	ACTCTGCATTTGAACAACT	4930404A10Rik_CCDS48798.1_ex4_11:54390502-54390524:-_5-2	4930404A10Rik	5.9581	8.18954	6.25457	0.727526	0.9526
1806	GCTTTCAGAGTCGCCAGCG	4930404N11Rik_CCDS24056.1_ex2_10:81364753-81364775:-_5-1	4930404N11Rik	12.6825	9.26093	12.5601	1.36947	1.00975
1809	GGCGTGAATTTCCAGCGCA	4930404N11Rik_CCDS24056.1_ex2_10:81364905-81364927:+_5-4	4930404N11Rik	7.66245	7.28733	7.10844	1.05148	1.07794
1807	GCGTGTGGGCCTCGCGGTA	4930404N11Rik_CCDS24056.1_ex2_10:81364786-81364808:+_5-2	4930404N11Rik	36.4504	37.0041	39.1942	0.985038	0.929997
1810	TGATGGCCGGCGCCCAACG	4930404N11Rik_CCDS24056.1_ex2_10:81364933-81364955:+_5-5	4930404N11Rik	21.1423	23.7246	20.2449	0.891155	1.04433
1808	CGGCCGCATCCCGTCCCAT	4930404N11Rik_CCDS24056.1_ex2_10:81364885-81364907:+_5-3	4930404N11Rik	33.3516	38.8931	35.7787	0.85752	0.932165
1811	AGTCCTCTTAACCAACAAT	4930407I10Rik_CCDS49678.1_ex1_15:82062623-82062645:+_5-1	4930407I10Rik	3.81992	2.4661	3.33172	1.54897	1.14653
1814	AATGATTCACGGACCAAAA	4930407I10Rik_CCDS49678.1_ex1_15:82063981-82064003:+_5-4	4930407I10Rik	6.82577	4.52429	4.48115	1.5087	1.52322
1815	GTGATATGACCCACGGGAC	4930407I10Rik_CCDS49678.1_ex1_15:82064091-82064113:+_5-5	4930407I10Rik	5.36933	4.32693	5.49923	1.24091	0.976379
1812	ATACCAGCGTGGGTCGACC	4930407I10Rik_CCDS49678.1_ex1_15:82063076-82063098:+_5-2	4930407I10Rik	10.3274	9.43009	9.99845	1.09516	1.0329
1813	ACTTGCATAGTACCGAGCC	4930407I10Rik_CCDS49678.1_ex1_15:82063814-82063836:+_5-3	4930407I10Rik	13.8911	15.2099	16.3368	0.91329	0.850294
1817	CAAAGGAACGAGGGCATCA	4930412D23Rik_CCDS59775.1_ex0_X:127721593-127721615:+_5-2	4930412D23Rik	20.9254	16.4223	15.9755	1.27421	1.30984
1816	GCGCTAACCGAATGTCCAA	4930412D23Rik_CCDS59775.1_ex0_X:127721577-127721599:+_5-1	4930412D23Rik	12.6515	10.2477	12.1988	1.23457	1.03711
1818	ATCATGGTAGGAGTAGTGC	4930412D23Rik_CCDS59775.1_ex0_X:127721608-127721630:+_5-3	4930412D23Rik	16.5251	14.8998	10.918	1.10908	1.51356
89497	TGGTATTTCGAGGAACCCA	4930412D23Rik_CCDS59775.1_ex0_X:127721716-127721738:-_5-5	4930412D23Rik	1	1	1	1	1
1819	GCTTTTATAGGTATGTGGA	4930412D23Rik_CCDS59775.1_ex0_X:127721677-127721699:-_5-4	4930412D23Rik	7.35257	7.54108	7.37117	0.975003	0.997477
1820	AGGTCACTTACGTATACAG	4930415F15Rik_CCDS48752.1_ex1_11:11495446-11495468:-_5-1	4930415F15Rik	8.3132	5.68025	6.05753	1.46353	1.37238
1822	CAGACTTGATATCTCCGTA	4930415F15Rik_CCDS48752.1_ex2_11:11496441-11496463:-_5-3	4930415F15Rik	4.1298	3.67846	3.75865	1.1227	1.09875
1824	TCAGTATACAAACTCAAGC	4930415F15Rik_CCDS48752.1_ex2_11:11496487-11496509:+_5-5	4930415F15Rik	5.55526	5.4265	5.26934	1.02373	1.05426
1823	AGTTTAGAGTGCCTAGGAC	4930415F15Rik_CCDS48752.1_ex2_11:11496466-11496488:-_5-4	4930415F15Rik	14.2629	17.0707	12.8885	0.835519	1.10664
1821	ACAATGTGGACAATCCCTA	4930415F15Rik_CCDS48752.1_ex2_11:11496426-11496448:+_5-2	4930415F15Rik	9.27384	12.2495	9.60436	0.757078	0.965586
1827	AGAAGATTCGTTTGAAATA	4930415L06Rik_CCDS53129.1_ex0_X:89931696-89931718:+_5-3	4930415L06Rik	2.51842	2.01499	2.44501	1.24984	1.03003
1828	CACTGTTCTTAGAAAATGA	4930415L06Rik_CCDS53129.1_ex0_X:89932051-89932073:-_5-4	4930415L06Rik	4.16079	3.42471	5.17082	1.21493	0.804668
1829	GTGGAAAAACGTAGGCACA	4930415L06Rik_CCDS53129.1_ex0_X:89932479-89932501:-_5-5	4930415L06Rik	5.7102	5.65206	5.00661	1.01029	1.14053
1826	TAACAGTATAGGTGATGAA	4930415L06Rik_CCDS53129.1_ex0_X:89931573-89931595:-_5-2	4930415L06Rik	3.26214	3.4529	4.05422	0.944751	0.804627
1825	ATGATTACCAAATTCAAGT	4930415L06Rik_CCDS53129.1_ex0_X:89931415-89931437:-_5-1	4930415L06Rik	2.70435	3.65026	3.10183	0.740864	0.871856
1834	CTTTCTCTGGACGCACGCC	4930415O20Rik_CCDS49722.1_ex2_15:98588621-98588643:-_5-5	4930415O20Rik	52.1305	47.7743	45.3354	1.09118	1.14988
1831	TACCAGGAAGCTGTGCGAA	4930415O20Rik_CCDS49722.1_ex1_15:98585355-98585377:+_5-2	4930415O20Rik	13.4882	13.7438	12.7899	0.981403	1.0546
1833	TCTGGCGGTCCAACATCCC	4930415O20Rik_CCDS49722.1_ex2_15:98588603-98588625:+_5-4	4930415O20Rik	18.1364	19.8056	19.5552	0.915724	0.927449
1832	TTCCCAAAAGTCCCCAATC	4930415O20Rik_CCDS49722.1_ex2_15:98588542-98588564:+_5-3	4930415O20Rik	4.90451	5.59567	4.90809	0.876483	0.999271
1830	CATCTTCTGAGATAATCGG	4930415O20Rik_CCDS49722.1_ex1_15:98585299-98585321:-_5-1	4930415O20Rik	6.54688	7.68205	7.56821	0.852231	0.865049
1835	ACCGATGACGAGCCTAAAG	4930422G04Rik_CCDS51066.1_ex4_3:127562857-127562879:+_5-1	4930422G04Rik	9.30483	7.25913	9.53868	1.28181	0.975484
1838	TGAAAGGATCCGCTACTAG	4930422G04Rik_CCDS51066.1_ex6_3:127573164-127573186:+_5-4	4930422G04Rik	6.36095	5.48289	4.80956	1.16015	1.32256
1839	AACGGTTTCCGTTTCTAAG	4930422G04Rik_CCDS51066.1_ex8_3:127583622-127583644:+_5-5	4930422G04Rik	4.9355	4.35512	6.25457	1.13326	0.789102
1837	CACGCGAAACTTCTATGGC	4930422G04Rik_CCDS51066.1_ex5_3:127567639-127567661:-_5-3	4930422G04Rik	12.7445	14.8998	14.0051	0.855349	0.909993
1836	TTTGGACTCGTCGCTGGAG	4930422G04Rik_CCDS51066.1_ex4_3:127563012-127563034:+_5-2	4930422G04Rik	17.2068	23.5554	21.0002	0.730481	0.819363
1840	AGGTCGATCGAACTTGGCG	4930427A07Rik_CCDS49196.1_ex0_12:113156544-113156566:-_5-1	4930427A07Rik	8.37518	4.29873	5.69627	1.94829	1.47029
1841	CGAATAGCCTCACCGCCTC	4930427A07Rik_CCDS49196.1_ex0_12:113156563-113156585:-_5-2	4930427A07Rik	36.2025	21.9766	27.9954	1.64733	1.29316
1842	TGTCTTGGCTCCTCGCCCG	4930427A07Rik_CCDS49196.1_ex2_12:113157274-113157296:+_5-3	4930427A07Rik	41.8114	41.7407	44.3831	1.00169	0.942058
1844	CAGATCCACCTGTACACGC	4930427A07Rik_CCDS49196.1_ex4_12:113158065-113158087:+_5-5	4930427A07Rik	42.1833	57.8679	51.7723	0.728958	0.814784
1843	CACTAGTCGGAGATCCACG	4930427A07Rik_CCDS49196.1_ex3_12:113157625-113157647:-_5-4	4930427A07Rik	6.05107	10.5297	7.37117	0.574668	0.82091
1849	AGACCAAATGGATTGTAAG	4930428D18Rik_CCDS53116.1_ex0_X:76397503-76397525:-_5-5	4930428D18Rik	4.16079	3.39651	3.89001	1.22502	1.06961
1845	TGGTAGACTTAAAGACCAC	4930428D18Rik_CCDS53116.1_ex0_X:76397259-76397281:-_5-1	4930428D18Rik	3.20016	2.91721	3.23319	1.09699	0.989783
1846	CACAGCATTTGTTGGCATG	4930428D18Rik_CCDS53116.1_ex0_X:76397278-76397300:+_5-2	4930428D18Rik	22.5678	22.3995	25.171	1.00751	0.896577
1847	CATTCTGATATTCAATGGA	4930428D18Rik_CCDS53116.1_ex0_X:76397378-76397400:-_5-3	4930428D18Rik	4.90451	5.53928	4.90809	0.885405	0.999271
1848	CCTTTGGAATGTGTGTCAG	4930428D18Rik_CCDS53116.1_ex0_X:76397464-76397486:+_5-4	4930428D18Rik	15.7194	22.625	19.6209	0.694778	0.801155
1853	GTATATATACCTTCATCAG	4930430A15Rik_CCDS16514.1_ex14_2:111228241-111228263:+_5-4	4930430A15Rik	1.24791	1.08458	1.26273	1.15059	0.988261
1854	ATCACCGTCGCTTGCAGCC	4930430A15Rik_CCDS16514.1_ex15_2:111229241-111229263:+_5-5	4930430A15Rik	22.1959	20.0593	20.9017	1.10651	1.06192
1852	CTTAAGTACAGTGCAAACA	4930430A15Rik_CCDS16514.1_ex13_2:111227933-111227955:-_5-3	4930430A15Rik	3.51004	3.56568	4.87525	0.984396	0.719972
1850	CTCTTATATGCCATAAGAT	4930430A15Rik_CCDS16514.1_ex11_2:111220786-111220808:-_5-1	4930430A15Rik	1.86767	1.93041	2.34648	0.967497	0.795943
1851	CCTTGAGAGCCAGTAAAAG	4930430A15Rik_CCDS16514.1_ex12_2:111225477-111225499:+_5-2	4930430A15Rik	4.6566	6.27233	6.18889	0.742404	0.752413
1857	GTCCGTTTTCATCAGGCAC	4930430F08Rik_CCDS24151.1_ex3_10:100578323-100578345:+_5-3	4930430F08Rik	15.2236	9.23273	10.6553	1.64887	1.42873
1858	GAGTTTCACTGGAACACTG	4930430F08Rik_CCDS24151.1_ex3_10:100578411-100578433:-_5-4	4930430F08Rik	8.03431	6.24414	6.71435	1.2867	1.19659
1856	TCTCTACTGGTACCCAACC	4930430F08Rik_CCDS24151.1_ex2_10:100577340-100577362:+_5-2	4930430F08Rik	6.60886	5.37011	7.43685	1.23067	0.888663
1859	GCGGTTGCAACAGAAAAAG	4930430F08Rik_CCDS24151.1_ex5_10:100586224-100586246:-_5-5	4930430F08Rik	5.89613	4.91901	5.20366	1.19864	1.13307
1855	AACCCCGGGATCATCAGGA	4930430F08Rik_CCDS24151.1_ex2_10:100577245-100577267:+_5-1	4930430F08Rik	16.9589	20.003	23.5618	0.84782	0.719762
1861	CTCCTTTTAACACTCAACA	4930432K09Rik_CCDS39134.1_ex2_5:87842717-87842739:+_5-2	4930432K09Rik	5.77218	3.22735	3.9557	1.78852	1.45921
1860	GAATATCCCGTTTGGCCTA	4930432K09Rik_CCDS39134.1_ex2_5:87842667-87842689:+_5-1	4930432K09Rik	11.381	9.00718	12.0674	1.26355	0.943119
1862	CATTCAATGGAGCATCAGC	4930432K09Rik_CCDS39134.1_ex2_5:87842852-87842874:-_5-3	4930432K09Rik	22.0719	18.3959	22.1497	1.19983	0.996492
1864	CACCTTCAGCAGGCATAGC	4930432K09Rik_CCDS39134.1_ex2_5:87842990-87843012:-_5-5	4930432K09Rik	28.5485	26.1211	26.1563	1.09293	1.09146
1863	CTACGGGCTCAGGTCTAAC	4930432K09Rik_CCDS39134.1_ex2_5:87842963-87842985:-_5-4	4930432K09Rik	9.67668	10.727	9.73573	0.902084	0.993936
1869	CTGCAACAGAGTGCTCCAC	4930432K21Rik_CCDS52616.1_ex4_8:84167078-84167100:+_5-5	4930432K21Rik	9.8936	5.59567	7.60106	1.76808	1.30161
1866	CTACACGAAGCTTTCAGGT	4930432K21Rik_CCDS52616.1_ex1_8:84159590-84159612:+_5-2	4930432K21Rik	14.7897	10.9526	11.6077	1.35034	1.27413
1865	CCTTCTGTAGAGCTAGGCG	4930432K21Rik_CCDS52616.1_ex1_8:84159560-84159582:+_5-1	4930432K21Rik	30.9965	25.3035	24.547	1.22499	1.26274
1868	CCTTTGAAAGGGTTCCATC	4930432K21Rik_CCDS52616.1_ex4_8:84166683-84166705:-_5-4	4930432K21Rik	3.23115	2.74805	3.79149	1.1758	0.85221
1867	CTCTTTGGGTGATCCTGCG	4930432K21Rik_CCDS52616.1_ex2_8:84161246-84161268:-_5-3	4930432K21Rik	18.6013	17.7192	19.588	1.04978	0.949624
1874	TAATCCGTCATTGACAAAG	4930432M17Rik_CCDS57255.1_ex2_3:121679545-121679567:-_5-5	4930432M17Rik	2.08459	1.4793	1.52546	1.40917	1.36653
1871	CGCTACTCCCTGATGAGCC	4930432M17Rik_CCDS57255.1_ex1_3:121674076-121674098:-_5-2	4930432M17Rik	15.7194	14.7024	15.253	1.06917	1.03057
1872	CACCTTGTCCACCCAACAG	4930432M17Rik_CCDS57255.1_ex1_3:121674122-121674144:-_5-3	4930432M17Rik	13.7361	15.5201	15.8442	0.885057	0.866952
1873	AAAGCATGACGTGAAATCC	4930432M17Rik_CCDS57255.1_ex2_3:121679516-121679538:-_5-4	4930432M17Rik	2.95225	3.62207	3.98854	0.815074	0.740185
1870	TGCGTAGAGCCTTCAAGAG	4930432M17Rik_CCDS57255.1_ex1_3:121674030-121674052:-_5-1	4930432M17Rik	11.2261	14.4487	11.0165	0.776963	1.01902
1875	AGCTTGGGGGGCATCCACC	4930433I11Rik_CCDS52207.1_ex1_7:40993295-40993317:+_5-1	4930433I11Rik	1.49581	1.08458	1.32841	1.37916	1.12602
1877	ACCACTTCTTCCCAGCATC	4930433I11Rik_CCDS52207.1_ex1_7:40993985-40994007:+_5-4	4930433I11Rik	26.3173	23.3299	25.6308	1.12805	1.02678
1878	GCTAGAAGTTCCCAGATGC	4930433I11Rik_CCDS52207.1_ex1_7:40993997-40994019:-_5-5	4930433I11Rik	9.86261	10.2477	10.721	0.96242	0.919938
1876	CCACCAATGTAGTGATATC	4930433I11Rik_CCDS52207.1_ex1_7:40993371-40993393:-_5-2	4930433I11Rik	12.5896	17.1835	15.7456	0.732654	0.799559
1881	AGAGCGCAGACTATCTGAG	4930435E12Rik_CCDS49850.1_ex3_16:38828443-38828465:-_5-3	4930435E12Rik	8.0653	3.11457	4.41547	2.58954	1.8266
1880	GCTGATAAATAGTCAGTGC	4930435E12Rik_CCDS49850.1_ex3_16:38828281-38828303:+_5-2	4930435E12Rik	14.7897	10.2759	12.2973	1.43926	1.20268
1883	TTGGATCATCTGAGCCAAC	4930435E12Rik_CCDS49850.1_ex3_16:38828603-38828625:-_5-5	4930435E12Rik	7.78641	6.30053	5.99184	1.23583	1.2995
1882	TATCCGGCCAAGCCAATGC	4930435E12Rik_CCDS49850.1_ex3_16:38828573-38828595:-_5-4	4930435E12Rik	15.8123	16.0839	18.7999	0.983113	0.841088
1879	CTTAGTGAGGATCTAGAAA	4930435E12Rik_CCDS49850.1_ex3_16:38828193-38828215:-_5-1	4930435E12Rik	3.47905	3.81943	4.05422	0.910883	0.858131
1888	TCCGCGGTGGATCGTCCAG	4930444A02Rik_CCDS22204.1_ex1_8:25986375-25986397:+_5-5	4930444A02Rik	31.5233	29.2507	31.575	1.0777	0.998362
1887	TCCGGGCTACTTCAGAATG	4930444A02Rik_CCDS22204.1_ex1_8:25986339-25986361:-_5-4	4930444A02Rik	8.77803	8.61246	9.21027	1.01922	0.95307
1884	CATGACCCTCGTGCCCAGG	4930444A02Rik_CCDS22204.1_ex0_8:25983320-25983342:+_5-1	4930444A02Rik	23.0016	22.7942	21.7556	1.0091	1.05727
1885	AGGTTGCTCAAGGAACCTA	4930444A02Rik_CCDS22204.1_ex0_8:25983447-25983469:+_5-2	4930444A02Rik	4.56364	5.25734	5.86048	0.868051	0.778714
1886	TCTCTACAGAGTGAGCACG	4930444A02Rik_CCDS22204.1_ex0_8:25983524-25983546:-_5-3	4930444A02Rik	4.84253	7.03358	6.22173	0.688488	0.778325
1889	GCTTGGAGCCTGATTTACC	4930444G20Rik_CCDS48519.1_ex0_10:22067394-22067416:-_5-1	4930444G20Rik	6.57787	5.76483	6.81287	1.14103	0.965506
1892	TCGGGAGCTCTTGATCTCG	4930444G20Rik_CCDS48519.1_ex0_10:22067880-22067902:+_5-5	4930444G20Rik	7.97233	7.65385	7.33833	1.04161	1.0864
1890	AAGCGGCCCTATTCCGTCA	4930444G20Rik_CCDS48519.1_ex0_10:22067722-22067744:-_5-3	4930444G20Rik	11.2571	11.6856	12.7243	0.963326	0.884694
1891	GATCCTTCGGTCAACTCTA	4930444G20Rik_CCDS48519.1_ex0_10:22067795-22067817:+_5-4	4930444G20Rik	6.57787	8.4151	7.66674	0.781675	0.857975
1896	TTTGGTCTAGAAGAGCCCA	4930444P10Rik_CCDS56622.1_ex2_1:16078677-16078699:-_5-4	4930444P10Rik	8.90198	5.22914	9.44016	1.70238	0.942991
1897	TCTGTTTGAGAGCAGTTGG	4930444P10Rik_CCDS56622.1_ex3_1:16080864-16080886:-_5-5	4930444P10Rik	14.108	9.99398	10.5568	1.41165	1.33639
1895	CACAAGCGCCTGCTGCACA	4930444P10Rik_CCDS56622.1_ex2_1:16078590-16078612:-_5-3	4930444P10Rik	20.8944	16.4505	16.4353	1.27014	1.27131
1893	CAGGAGAAGTCAAAAGGTA	4930444P10Rik_CCDS56622.1_ex1_1:16068794-16068816:-_5-1	4930444P10Rik	1.89866	1.62027	1.88671	1.17181	1.00633
1894	GGTCACCTACCTGATGGGA	4930444P10Rik_CCDS56622.1_ex2_1:16078557-16078579:+_5-2	4930444P10Rik	18.9112	19.8338	20.4748	0.953482	0.923633
1900	CCTCTTTGCCAGAAATCCC	4930447A16Rik_CCDS56981.1_ex0_15:37425793-37425815:-_5-4	4930447A16Rik	10.3584	8.10496	8.45492	1.27803	1.22513
1898	ATTGCATGAAGGATGCCAC	4930447A16Rik_CCDS56981.1_ex0_15:37425721-37425743:-_5-1	4930447A16Rik	6.73281	5.62386	5.4007	1.19719	1.24665
1899	TGGAGCTATAAATTCACCA	4930447A16Rik_CCDS56981.1_ex0_15:37425776-37425798:+_5-3	4930447A16Rik	9.52174	8.97898	10.5239	1.06045	0.904772
89942	ATATTATTTATTTCTGAAT	4930447A16Rik_CCDS56981.1_ex0_15:37425757-37425779:+_5-2	4930447A16Rik	1	1	1	1	1
1901	CTCCATTTTACAAAAAGAA	4930447A16Rik_CCDS56981.1_ex1_15:37429820-37429842:+_5-5	4930447A16Rik	2.92127	2.94541	3.26603	0.991804	0.894438
1905	TCAACCAAATTACAATCAA	4930447C04Rik_CCDS25971.1_ex5_12:72898506-72898528:-_5-2	4930447C04Rik	3.72696	3.11457	3.13467	1.19662	1.18895
1904	GCTATAAACAAAGTAGATG	4930447C04Rik_CCDS25971.1_ex14_12:72915408-72915430:-_5-5	4930447C04Rik	1.15494	1	1.09852	1.15494	1.05136
1902	ATTTAGTCAGAGATGGGAA	4930447C04Rik_CCDS25971.1_ex11_12:72909783-72909805:+_5-3	4930447C04Rik	2.02261	1.9868	1.82103	1.01802	1.1107
89948	GAATCAAAATGTAGTACAC	4930447C04Rik_CCDS25971.1_ex4_12:72894983-72895005:-_5-1	4930447C04Rik	1	1	1	1	1
1903	TTCTTGGTAAGCAGTAAGC	4930447C04Rik_CCDS25971.1_ex13_12:72913201-72913223:+_5-4	4930447C04Rik	6.94973	9.09176	8.15935	0.764398	0.85175
1906	GATAATGCTGTTCTTACGC	4930451C15Rik_CCDS28006.2_ex6_16:17559249-17559271:+_5-1	4930451C15Rik	14.17	8.58426	11.8047	1.65069	1.20037
1909	TGGCACAACACTATTGGCC	4930451C15Rik_CCDS28006.2_ex7_16:17559805-17559827:+_5-4	4930451C15Rik	5.1834	3.56568	4.97377	1.45369	1.04215
1907	TTCCAGGGGGTCCGGGCAT	4930451C15Rik_CCDS28006.2_ex6_16:17559363-17559385:-_5-2	4930451C15Rik	31.4614	30.0401	32.1662	1.04731	0.978088
1910	TGCTAGGCACCCATGGGCT	4930451C15Rik_CCDS28006.2_ex7_16:17559864-17559886:-_5-5	4930451C15Rik	12.2487	12.0804	12.363	1.01394	0.990754
1908	AATTGAACCTTCGGCACCG	4930451C15Rik_CCDS28006.2_ex7_16:17559750-17559772:-_5-3	4930451C15Rik	7.41455	8.58426	7.92947	0.863737	0.935063
1914	GGCTAGCTCGGTCTGAGTC	4930451I11Rik_CCDS52402.1_ex2_7:126830925-126830947:+_5-4	4930451I11Rik	17.0209	12.7852	14.3006	1.33129	1.19022
1913	AAACCGGGCCACAGCAAGA	4930451I11Rik_CCDS52402.1_ex2_7:126830905-126830927:+_5-3	4930451I11Rik	3.41708	2.86082	4.25127	1.19444	0.803778
1912	GGCTTCTCTCCAATAAACC	4930451I11Rik_CCDS52402.1_ex2_7:126830891-126830913:+_5-2	4930451I11Rik	7.0117	6.04678	6.18889	1.15958	1.13295
1911	CTATAACGTTCGTTAAGAC	4930451I11Rik_CCDS52402.1_ex2_7:126830871-126830893:-_5-1	4930451I11Rik	3.78893	4.29873	5.17082	0.881407	0.732754
1915	TTTACAACTTGCTGGGGTC	4930451I11Rik_CCDS52402.1_ex2_7:126830966-126830988:+_5-5	4930451I11Rik	14.6658	17.2963	13.4796	0.847914	1.088
1917	TCTAGTTGGACTGATCCAG	4930452B06Rik_CCDS26814.1_ex12_14:8644453-8644475:-_5-4	4930452B06Rik	12.1247	7.08997	10.2612	1.71013	1.18161
1916	GATGATTCCATCCAACGAC	4930452B06Rik_CCDS26814.1_ex10_14:8558106-8558128:+_5-3	4930452B06Rik	8.87099	6.07497	7.6339	1.46025	1.16205
1918	CTTATTCTCCTTCGGTAAC	4930452B06Rik_CCDS26814.1_ex13_14:8659395-8659417:+_5-5	4930452B06Rik	7.94135	6.4133	7.56821	1.23826	1.0493
1920	CACATCGCCTTCGGATCCA	4930452B06Rik_CCDS26814.1_ex8_14:8518686-8518708:-_5-2	4930452B06Rik	30.2528	28.0383	27.6998	1.07898	1.09217
1919	TGGCAGACGGAATAACCTA	4930452B06Rik_CCDS26814.1_ex8_14:8518642-8518664:-_5-1	4930452B06Rik	5.15241	5.37011	3.9557	0.95946	1.30253
1923	TGTCCTCCGTCTTTGTAAC	4930453N24Rik_CCDS28265.1_ex1_16:64768940-64768962:+_5-3	4930453N24Rik	5.24538	3.4811	2.93762	1.50682	1.78559
1924	CTTAAATATGACTTCTCGG	4930453N24Rik_CCDS28265.1_ex1_16:64769076-64769098:+_5-4	4930453N24Rik	9.49075	7.20274	9.0789	1.31766	1.04536
1922	ATATACCTGCTTAAAGAGC	4930453N24Rik_CCDS28265.1_ex1_16:64768917-64768939:+_5-2	4930453N24Rik	2.64237	2.18416	3.3974	1.20979	0.777763
1925	GCCTACCTTGGCGGTCCAC	4930453N24Rik_CCDS28265.1_ex2_16:64770730-64770752:+_5-5	4930453N24Rik	18.3534	18.2549	18.2416	1.00539	1.00613
1921	CTTGAGGTGGGCCCAAAAA	4930453N24Rik_CCDS28265.1_ex0_16:64766875-64766897:+_5-1	4930453N24Rik	11.6289	15.3791	14.6947	0.756153	0.791368
1929	TAACACATCCGGTTAAAGG	4930468A15Rik_CCDS53117.1_ex0_X:76583232-76583254:+_5-4	4930468A15Rik	11.2571	10.6988	9.76857	1.05218	1.15238
1930	ACTAAGGTCATGCCATGCT	4930468A15Rik_CCDS53117.1_ex0_X:76583295-76583317:+_5-5	4930468A15Rik	7.07368	6.80802	6.22173	1.03902	1.13693
1926	GATAAGTAATTGTACAAGA	4930468A15Rik_CCDS53117.1_ex0_X:76582995-76583017:+_5-1	4930468A15Rik	1.61976	1.56389	1.59114	1.03573	1.01799
1927	ATTGAACTCAGGGAGACTC	4930468A15Rik_CCDS53117.1_ex0_X:76583091-76583113:-_5-2	4930468A15Rik	30.3768	37.709	34.3994	0.805558	0.883062
1928	GGGCAACTCGAATATCCAG	4930468A15Rik_CCDS53117.1_ex0_X:76583182-76583204:+_5-3	4930468A15Rik	5.77218	7.87941	6.71435	0.732565	0.859678
1932	TTCTGGTCTTGCTTACCCT	4930474N05Rik_CCDS49448.1_ex0_14:36095137-36095159:-_5-2	4930474N05Rik	11.1021	8.27413	9.53868	1.34179	1.16391
1933	GCTGAAATGGTTGTTAAGT	4930474N05Rik_CCDS49448.1_ex1_14:36095357-36095379:+_5-3	4930474N05Rik	6.02008	5.03178	5.10513	1.19641	1.17922
1934	GTTACCCCCCTACAGGTAC	4930474N05Rik_CCDS49448.1_ex1_14:36095456-36095478:+_5-4	4930474N05Rik	13.2093	12.1649	13.9065	1.08585	0.949865
1935	TCTATGCTCAACAGAATGA	4930474N05Rik_CCDS49448.1_ex2_14:36096412-36096434:-_5-5	4930474N05Rik	2.11557	2.09958	1.75534	1.00762	1.20522
1931	CTCTTGCCTTCAACGCCTG	4930474N05Rik_CCDS49448.1_ex0_14:36095086-36095108:+_5-1	4930474N05Rik	37.504	40.5002	35.089	0.926021	1.06883
1936	CAATTTCAATGGGTCAGCA	4930480E11Rik_CCDS53120.1_ex0_X:78369959-78369981:+_5-1	4930480E11Rik	24.7369	22.3995	21.9526	1.10435	1.12683
1938	GGAATTTTCAGGGGGATGC	4930480E11Rik_CCDS53120.1_ex0_X:78370159-78370181:-_5-4	4930480E11Rik	11.7529	10.6706	10.9837	1.10142	1.07003
89860	AGAAGACCACAATACAAGT	4930480E11Rik_CCDS53120.1_ex0_X:78369985-78370007:+_5-2	4930480E11Rik	1	1	1	1	1
1937	TGATCAGAATCTGAAAAAG	4930480E11Rik_CCDS53120.1_ex0_X:78370074-78370096:+_5-3	4930480E11Rik	5.27637	5.70845	4.80956	0.924308	1.09706
1939	GTGTGCATCTATAATAAAG	4930480E11Rik_CCDS53120.1_ex0_X:78370241-78370263:-_5-5	4930480E11Rik	1.71273	3.4811	2.70774	0.492008	0.632531
1942	GCACTAAAAGCCCAACTAG	4930486L24Rik_CCDS26583.1_ex3_13:60853292-60853314:+_5-3	4930486L24Rik	2.8283	2.01499	3.06899	1.40363	0.921575
1944	AATTCGTGAAAATGATGAC	4930486L24Rik_CCDS26583.1_ex4_13:60853631-60853653:-_5-5	4930486L24Rik	3.51004	3.28374	3.13467	1.06892	1.11975
1943	TCGAAGGCAGAAGATCAAG	4930486L24Rik_CCDS26583.1_ex4_13:60853606-60853628:-_5-4	4930486L24Rik	5.36933	5.20095	5.82764	1.03237	0.921356
1940	AATGGCGGCCTCGCAACTG	4930486L24Rik_CCDS26583.1_ex3_13:60853123-60853145:-_5-1	4930486L24Rik	14.9447	19.3827	18.2744	0.771032	0.817792
1941	GTGCAACTGGATCCCTAGA	4930486L24Rik_CCDS26583.1_ex3_13:60853275-60853297:-_5-2	4930486L24Rik	9.76965	13.2645	9.76857	0.736525	1.00011
1949	AAACCTTATAATGGTGACC	4930502E18Rik_CCDS30136.1_ex3_X:53736279-53736301:+_5-5	4930502E18Rik	3.85091	1.9868	2.77342	1.93825	1.38851
1947	GACTGCGTTCAATCCACGA	4930502E18Rik_CCDS30136.1_ex1_X:53727524-53727546:-_5-3	4930502E18Rik	20.6465	20.6232	23.6603	1.00113	0.87262
1945	ACAAACAGGGAGTTGTGGC	4930502E18Rik_CCDS30136.1_ex1_X:53727384-53727406:+_5-1	4930502E18Rik	16.804	18.5087	18.767	0.907897	0.895398
1948	ATGCTGACTACAATGGTCA	4930502E18Rik_CCDS30136.1_ex2_X:53733805-53733827:+_5-4	4930502E18Rik	8.80902	10.3605	10.0641	0.85025	0.875288
1946	CCAGTCTCAACGTCAGCAC	4930502E18Rik_CCDS30136.1_ex1_X:53727448-53727470:-_5-2	4930502E18Rik	6.11305	7.4001	7.14128	0.826076	0.856015
1950	GGGTCATCAGAATAAGACC	4930503B20Rik_CCDS38667.1_ex1_3:146650648-146650670:+_5-1	4930503B20Rik	2.54941	2.07138	2.37933	1.23078	1.07148
1954	GGATTACGACAGGTCCCGA	4930503B20Rik_CCDS38667.1_ex1_3:146650942-146650964:-_5-5	4930503B20Rik	12.0938	9.93759	10.2612	1.21697	1.17859
1951	GCTCTTCTGGACCCAGTAA	4930503B20Rik_CCDS38667.1_ex1_3:146650738-146650760:+_5-2	4930503B20Rik	4.68759	4.07318	4.48115	1.15084	1.04607
1953	CCCGATGGAACCGAAACAA	4930503B20Rik_CCDS38667.1_ex1_3:146650928-146650950:-_5-4	4930503B20Rik	11.1641	10.3323	11.9361	1.08051	0.935325
1952	CAGCAGAGATGAAACCGAT	4930503B20Rik_CCDS38667.1_ex1_3:146650855-146650877:-_5-3	4930503B20Rik	5.52427	8.35871	6.91139	0.6609	0.799299
1956	CAGAAAGATAAATGCTGAG	4930503E14Rik_CCDS36890.1_ex2_14:44170335-44170357:-_4-3	4930503E14Rik	2.54941	2.15597	2.57637	1.18249	0.989534
1957	AATGAAATCATTCTGGGAA	4930503E14Rik_CCDS36890.1_ex3_14:44171178-44171200:-_4-4	4930503E14Rik	4.50166	4.35512	4.94093	1.03365	0.911096
1955	TCATGTTGTGATTTGATGA	4930503E14Rik_CCDS36890.1_ex1_14:44169258-44169280:+_4-1	4930503E14Rik	7.19763	10.3041	10.1298	0.69852	0.710539
1958	AAATTGGATACTTAACGTC	4930503L19Rik_CCDS29333.1_ex5_18:70468019-70468041:+_5-1	4930503L19Rik	3.97486	2.29694	3.26603	1.73051	1.21703
1959	GCTCGAGAACTATCCAAGA	4930503L19Rik_CCDS29333.1_ex5_18:70468090-70468112:-_5-2	4930503L19Rik	3.41708	3.31193	3.52876	1.03175	0.96835
1962	TGAACACTGACGGTGAGAT	4930503L19Rik_CCDS29333.1_ex6_18:70469493-70469515:-_5-5	4930503L19Rik	12.9304	19.0725	10.8852	0.677961	1.1879
1960	TGTTTGGTCGGTGATCAGG	4930503L19Rik_CCDS29333.1_ex5_18:70468352-70468374:+_5-3	4930503L19Rik	20.0267	30.2657	27.043	0.661698	0.740552
1961	TCGGGTATATGTACGTAGC	4930503L19Rik_CCDS29333.1_ex6_18:70469453-70469475:+_5-4	4930503L19Rik	5.89613	10.8962	8.68481	0.541118	0.678901
1966	CACATGCTTCACCGTGAAG	4930504O13Rik_CCDS24731.1_ex1_11:58447400-58447422:-_5-4	4930504O13Rik	12.6206	9.28912	12.166	1.35864	1.03737
1963	GGGACGTTGTTGACACCTG	4930504O13Rik_CCDS24731.1_ex0_11:58446385-58446407:+_5-1	4930504O13Rik	19.5619	16.9862	18.57	1.15164	1.05342
1967	ATTACGATGAACGAGATAG	4930504O13Rik_CCDS24731.1_ex1_11:58447465-58447487:-_5-5	4930504O13Rik	1.24791	1.25375	1.16421	0.995339	1.07189
1964	GCACCTGTGTTTATGATGC	4930504O13Rik_CCDS24731.1_ex1_11:58447316-58447338:+_5-2	4930504O13Rik	11.9698	14.1667	15.3844	0.844924	0.778049
1965	TGGAACACCACTTGAGCTC	4930504O13Rik_CCDS24731.1_ex1_11:58447365-58447387:+_5-3	4930504O13Rik	20.4915	24.4013	23.1349	0.839774	0.885743
1970	CACTTTTGGTGTCATAAGA	4930505A04Rik_CCDS48764.1_ex2_11:30446313-30446335:+_5-3	4930505A04Rik	6.237	4.29873	5.7948	1.45089	1.07631
1968	TTAGTTCCACTTACCAGTC	4930505A04Rik_CCDS48764.1_ex1_11:30427152-30427174:-_5-1	4930505A04Rik	8.25123	7.56927	6.38594	1.0901	1.29209
90017	TCCCTACATTGATAATAAA	4930505A04Rik_CCDS48764.1_ex3_11:30454683-30454705:-_5-5	4930505A04Rik	1	1	1	1	1
1969	GCAAAACCAATGGGCATGC	4930505A04Rik_CCDS48764.1_ex2_11:30446268-30446290:+_5-2	4930505A04Rik	10.0176	10.4733	12.5601	0.956487	0.797572
1971	AATAAAGGGCCAGAAAAGC	4930505A04Rik_CCDS48764.1_ex3_11:30454670-30454692:-_5-4	4930505A04Rik	4.99747	6.07497	5.7948	0.822633	0.862407
1973	ATGCTATACATGGCCAAAC	4930506M07Rik_CCDS50480.1_ex10_19:59038333-59038355:-_5-4	4930506M07Rik	7.04269	5.87761	7.04276	1.19822	0.99999
1974	TCACATATGGTTATAGAGG	4930506M07Rik_CCDS50480.1_ex11_19:59041933-59041955:-_5-5	4930506M07Rik	7.69344	7.4001	9.21027	1.03964	0.835311
1976	AAGGTGTTAGCCATCGAGC	4930506M07Rik_CCDS50480.1_ex9_19:59035082-59035104:-_5-2	4930506M07Rik	12.2487	13.8284	13.1512	0.885764	0.931375
1972	TCTCCTCTGTAATTACGTC	4930506M07Rik_CCDS50480.1_ex10_19:59038308-59038330:+_5-3	4930506M07Rik	24.2411	29.9837	24.974	0.808476	0.970655
1975	TACTCTTCAACAGCCAACA	4930506M07Rik_CCDS50480.1_ex7_19:59028224-59028246:+_5-1	4930506M07Rik	8.03431	10.0222	8.68481	0.801654	0.925099
1980	TTTGTACTCGCTTGCTGCA	4930511M11Rik_CCDS19067.1_ex4_5:3666816-3666838:+_5-4	4930511M11Rik	51.7586	29.871	36.0743	1.73274	1.43478
1978	TAGCGAACCTGTAAGAAAG	4930511M11Rik_CCDS19067.1_ex3_5:3665276-3665298:+_5-2	4930511M11Rik	2.48743	2.21235	1.68966	1.12434	1.47215
1977	AAAACACGTCTATTCGTAA	4930511M11Rik_CCDS19067.1_ex1_5:3662012-3662034:+_5-1	4930511M11Rik	1.21692	1.28194	1.26273	0.949276	0.96372
1981	GTTTGCGGGCACTTGGCGC	4930511M11Rik_CCDS19067.1_ex4_5:3666843-3666865:-_5-5	4930511M11Rik	29.4161	35.4252	30.2942	0.830373	0.971014
1979	AGGAGTGCATACAGGAACC	4930511M11Rik_CCDS19067.1_ex3_5:3665312-3665334:-_5-3	4930511M11Rik	3.69597	8.66885	6.45162	0.426351	0.572875
1983	CTTCTGTTTCCAATGCAAA	4930513O06Rik_CCDS57775.1_ex0_X:139090843-139090865:-_5-2	4930513O06Rik	12.3727	8.95079	11.9361	1.3823	1.03658
1985	ATACTCTATTTGCTCAGTG	4930513O06Rik_CCDS57775.1_ex0_X:139090911-139090933:-_5-4	4930513O06Rik	14.5728	12.4751	14.0707	1.16815	1.03568
1984	ACCTCACAGTGATAGAGGA	4930513O06Rik_CCDS57775.1_ex0_X:139090870-139090892:+_5-3	4930513O06Rik	6.88775	6.63886	7.2398	1.03749	0.951372
1982	ATCAAGTTTTCTGGGACTA	4930513O06Rik_CCDS57775.1_ex0_X:139090820-139090842:-_5-1	4930513O06Rik	11.3191	11.6011	9.04606	0.975692	1.25127
1986	GAATACCTTGTAGAGTCCA	4930513O06Rik_CCDS57775.1_ex0_X:139090938-139090960:+_5-5	4930513O06Rik	6.26799	7.76663	7.30549	0.807041	0.857983
1987	CCTCCTACCAGATTCCAAC	4930519G04Rik_CCDS19574.1_ex3_5:114870707-114870729:+_5-1	4930519G04Rik	12.9924	9.65565	10.2612	1.34558	1.26617
1991	TTGGATTGTCCAGAGGCAG	4930519G04Rik_CCDS19574.1_ex6_5:114877965-114877987:+_5-5	4930519G04Rik	9.18087	8.16135	8.3564	1.12492	1.09866
[truncated: 88,231 more rows]
