# Supplementary material for: LIN37-DREAM Prevents DNA End Resection and Homologous Recombination at DNA Double Strand Breaks in Quiescent Cells
Source: bioRxiv preprint, doi:10.1101/2021.04.21.440786, version 1 (2021-04-21)
Supplement: RPA screen in LIg4-Lin37 KO cells [file 440786_file04.xlsx]

## Sheet: normalized.counts
guide_sequence	gRNA_ID	gene	Normalized Dox 3 days_RPA low	Normalized Dox 3 days_RPA high	Normalized Dox 7 days_RPA low	Normalized Dox 7 days RPA high	Dox3_High vs Low	Dox7_High vs Low	Dox3_Low vs High	Dox7_Low vs High
GAAGTGTCCCAGGGCGAGG	0610007P14Rik_CCDS26063.1_ex1_12:85816385-85816407:+_5-2	0610007P14Rik	8.29328	9.40393	10.6764	4.69296	1.13392	0.439565	0.881895	2.27498
AGCCCGGACCTTTGGGATC	0610007P14Rik_CCDS26063.1_ex2_12:85819535-85819557:-_5-4	0610007P14Rik	19.791	27.944	31.7255	40.5052	1.41195	1.27674	0.708239	0.783245
AAATACAAACAACTCTGAG	0610007P14Rik_CCDS26063.1_ex1_12:85816364-85816386:+_5-1	0610007P14Rik	4.41127	1.00659	1.81234	2.75138	0.228185	1.51814	4.38241	0.658701
ACTCTATCACATCACACTG	0610007P14Rik_CCDS26063.1_ex1_12:85816413-85816435:-_5-3	0610007P14Rik	4.62407	2.19209	9.35433	14.5514	0.474061	1.55558	2.10943	0.642847
TCTACGAGAAGCTCTACAC	0610007P14Rik_CCDS26063.1_ex3_12:85822102-85822124:-_5-5	0610007P14Rik	2.70241	10.6882	6.63858	10.9456	3.95507	1.64879	0.25284	0.606505
TTCATAGCTCATGCTGCTC	0610009B22Rik_CCDS36149.1_ex0_11:51685931-51685953:-_5-5	0610009B22Rik	17.2567	20.4028	19.2537	9.06745	1.18231	0.470946	0.845802	2.12339
CCACATGTTTTCGTCGACG	0610009B22Rik_CCDS36149.1_ex0_11:51685907-51685929:+_5-4	0610009B22Rik	22.9895	23.8803	17.7963	12.2294	1.03875	0.687192	0.962696	1.4552
TTCGTCTCGGCGTTCGTCA	0610009B22Rik_CCDS36149.1_ex0_11:51685838-51685860:-_5-3	0610009B22Rik	5.57845	29.5905	17.7565	18.9418	5.30443	1.06675	0.188522	0.937424
CGTCACGGCTGGGCACATG	0610009B22Rik_CCDS36149.1_ex0_11:51685824-51685846:-_5-2	0610009B22Rik	14.0841	18.427	20.5917	22.0958	1.30836	1.07305	0.764318	0.931926
CTGCATGACGTGAGGCACG	0610009B22Rik_CCDS36149.1_ex0_11:51685793-51685815:-_5-1	0610009B22Rik	18.9785	12.1174	9.9835	19.5757	0.638482	1.96081	1.56621	0.509993
AATCCTGATAGGTGGTCGC	0610009D07Rik_CCDS25791.1_ex2_12:4826826-4826848:-_5-5	0610009D07Rik	1.83831	1	3.90689	1	0.543978	0.255958	1.83831	3.90689
ACACTCTGATTTGACGAAT	0610009D07Rik_CCDS25791.1_ex1_12:4820693-4820715:-_5-2	0610009D07Rik	2.80559	2.10647	1	1	0.750814	1	1.33189	1
ATGATATATTTGGGAAATA	0610009D07Rik_CCDS25791.1_ex1_12:4820669-4820691:+_5-1	0610009D07Rik	1	1	1	1	1	1	1	1
GGAATACACCTGAAACCAG	0610009D07Rik_CCDS25791.1_ex2_12:4826759-4826781:+_5-3	0610009D07Rik	1	1	1	1	1	1	1	1
ACAGCCTATGTGGTCTATG	0610009D07Rik_CCDS25791.1_ex2_12:4826782-4826804:+_5-4	0610009D07Rik	1	2.18551	1	1	2.18551	1	0.45756	1
CCGAGGCCCACCCCCCTGG	0610009O20Rik_CCDS50260.1_ex5_18:38254339-38254361:+_5-5	0610009O20Rik	19.3074	11.4588	6.67043	2.46609	0.593494	0.369704	1.68494	2.70486
GAAGTCTCGGCTAGCATGC	0610009O20Rik_CCDS50260.1_ex5_18:38254299-38254321:-_5-4	0610009O20Rik	38.4917	38.0866	42.0629	34.0464	0.989476	0.809418	1.01064	1.23546
CCACGGTTCAAAGAGGAGC	0610009O20Rik_CCDS50260.1_ex2_18:38251291-38251313:+_5-2	0610009O20Rik	13.22	15.4698	10.971	10.4305	1.17018	0.950731	0.854567	1.05182
CCTAGTGAGCGGCAGGGTA	0610009O20Rik_CCDS50260.1_ex1_18:38251165-38251187:-_5-1	0610009O20Rik	20.9388	20.6333	23.6817	32.0177	0.985409	1.352	1.01481	0.739646
ATCCACTTCCACGCCCCTC	0610009O20Rik_CCDS50260.1_ex3_18:38252859-38252881:+_5-3	0610009O20Rik	25.9042	26.2118	17.7963	28.301	1.01187	1.59027	0.988265	0.628822
ACATAGTATAGCTACCACA	0610010F05Rik_CCDS36119.1_ex17_11:23622504-23622526:-_5-3	0610010F05Rik	1.97373	3.30515	3.18216	2.72761	1.67457	0.857156	0.597167	1.16665
ATCAGCTATGCGTGTAAGA	0610010F05Rik_CCDS36119.1_ex14_11:23615151-23615173:+_5-1	0610010F05Rik	16.4249	17.9725	13.201	13.6004	1.09423	1.03026	0.913888	0.97063
TATGTTAAACGGAACACTA	0610010F05Rik_CCDS36119.1_ex16_11:23620259-23620281:-_5-2	0610010F05Rik	2.69596	1	3.883	6.49981	0.370925	1.67391	2.69596	0.597402
ATAACCCTTTAATGGCTAC	0610010F05Rik_CCDS36119.1_ex18_11:23625043-23625065:-_5-4	0610010F05Rik	1.72868	9.85838	3.81132	7.14172	5.70282	1.87382	0.175352	0.53367
CCTCTTTGGGCGTTAATCC	0610010F05Rik_CCDS36119.1_ex19_11:23628871-23628893:+_5-5	0610010F05Rik	8.11917	7.2305	5.59528	13.4182	0.890546	2.39812	1.12291	0.416993
GCTCCAGTGTCCCTGAAGC	0610010K14Rik_CCDS24940.1_ex2_11:70236053-70236075:-_9-2	0610010K14Rik	8.18366	9.07462	14.9292	6.66624	1.10887	0.446523	0.901818	2.23952
GACGGAGATAGAGATGCTG	0610010K14Rik_CCDS48833.1_ex2_11:70236942-70236964:-_9-6	0610010K14Rik	16.5087	7.79032	5.88199	3.05252	0.471892	0.518961	2.11913	1.92693
TCTCGGACTCTTCCCCTGC	0610010K14Rik_CCDS24940.1_ex3_11:70237531-70237553:-_9-9	0610010K14Rik	30.9599	26.416	24.8206	17.65	0.853233	0.711103	1.17201	1.40627
CCCTTCCGACAGTGCCAAG	0610010K14Rik_CCDS48833.1_ex2_11:70236969-70236991:-_9-7	0610010K14Rik	17.9596	16.3457	29.9654	21.7313	0.910138	0.725213	1.09873	1.37891
TACACTTTTCGCTTCACAG	0610010K14Rik_CCDS24940.1_ex2_11:70236175-70236197:+_9-5	0610010K14Rik	8.69309	11.7223	5.86606	4.92278	1.34846	0.839197	0.741589	1.19162
CTGGTCTCACGTACCCGGC	0610010K14Rik_CCDS24940.1_ex3_11:70237516-70237538:+_9-8	0610010K14Rik	11.9045	35.9132	15.7176	18.1572	3.01679	1.15521	0.331479	0.865642
GACCCAAGAAGATGACGTC	0610010K14Rik_CCDS24940.1_ex2_11:70236110-70236132:-_9-3	0610010K14Rik	7.22928	3.11416	3.90689	5.23185	0.43077	1.33913	2.32142	0.746753
CTTGGGTGACTCAGCTGGA	0610010K14Rik_CCDS24940.1_ex2_11:70236135-70236157:+_9-4	0610010K14Rik	16.2572	13.8693	10.5171	14.3137	0.853119	1.36099	1.17217	0.734758
CCTTCTGTTTCTTTATGGG	0610010K14Rik_CCDS24940.1_ex2_11:70236026-70236048:+_9-1	0610010K14Rik	15.7349	10.0691	9.12338	15.2726	0.639924	1.674	1.56268	0.59737
TGCCACTCGGCATTCGGGA	0610011F06Rik_CCDS28536.1_ex0_17:25875672-25875694:-_5-2	0610011F06Rik	13.9809	17.2678	17.5574	10.5098	1.2351	0.598596	0.809651	1.67057
TCGGGCTCTGGACAGCACG	0610011F06Rik_CCDS28536.1_ex0_17:25875634-25875656:+_5-1	0610011F06Rik	23.9568	11.1295	14.5549	8.87726	0.464566	0.609916	2.15254	1.63957
CAGGTCCAGCGATCGGGGT	0610011F06Rik_CCDS28536.1_ex1_17:25876053-25876075:-_5-5	0610011F06Rik	24.5952	13.7047	23.5623	19.5599	0.557211	0.830136	1.79465	1.20462
GCTGTACCTGGACGTGACC	0610011F06Rik_CCDS28536.1_ex1_17:25876007-25876029:+_5-4	0610011F06Rik	12.3688	18.5521	16.4902	17.23	1.49992	1.04487	0.666704	0.957061
AGCGTTGGTCCACGTCCGA	0610011F06Rik_CCDS28536.1_ex0_17:25875695-25875717:-_5-3	0610011F06Rik	17.4889	7.64543	11.871	15.9858	0.437159	1.34663	2.2875	0.742595
ATTGTCCTGCCACCGGGTC	0610012H03Rik_CCDS38191.1_ex1_2:105297873-105297895:-_5-2	0610012H03Rik	21.4805	22.9648	24.4861	15.3043	1.0691	0.625019	0.935366	1.59995
GTACACAGCGTTGTTCACG	0610012H03Rik_CCDS38191.1_ex1_2:105297906-105297928:-_5-3	0610012H03Rik	2.59279	12.012	13.8142	15.2013	4.63287	1.10041	0.215849	0.908756
GCGAGCCGAAGATCCCCAC	0610012H03Rik_CCDS38191.1_ex1_2:105297818-105297840:+_5-1	0610012H03Rik	21.1259	7.91546	14.1408	18.918	0.374681	1.33783	2.66893	0.747477
GGGTGTATGGAACTTGCAC	0610012H03Rik_CCDS38191.1_ex2_2:105378690-105378712:-_5-5	0610012H03Rik	3.90184	6.67068	6.20852	8.45724	1.70963	1.3622	0.584924	0.734107
TGCTGACATCCCCCCAGGT	0610012H03Rik_CCDS38191.1_ex2_2:105378652-105378674:+_5-4	0610012H03Rik	10.518	15.9506	7.57038	11.7857	1.5165	1.55681	0.659414	0.642338
TTCTGTTTAGACTATGAGG	0610030E20Rik_CCDS51808.1_ex2_6:72348623-72348645:+_5-5	0610030E20Rik	4.2823	4.1416	5.86606	2.56119	0.967143	0.436611	1.03397	2.29037
CAGTCTGGGTTCACGGGGT	0610030E20Rik_CCDS51808.1_ex2_6:72348538-72348560:-_5-3	0610030E20Rik	4.31454	11.9067	20.3289	9.70144	2.75966	0.477225	0.362363	2.09545
GCTCCGAGCTAGAGCCTCC	0610030E20Rik_CCDS51808.1_ex2_6:72348591-72348613:+_5-4	0610030E20Rik	4.11464	12.0713	8.36679	7.24475	2.93375	0.865894	0.340861	1.15488
AGGGACGACTACGACAAGA	0610030E20Rik_CCDS51808.1_ex1_6:72347590-72347612:+_5-2	0610030E20Rik	1.0129	3.89132	4.33696	3.79746	3.84177	0.875604	0.260296	1.14207
CCGATCGAGCTGGTTCCGA	0610030E20Rik_CCDS51808.1_ex0_6:72347495-72347517:-_5-1	0610030E20Rik	13.5811	28.5631	18.1865	20.1226	2.10315	1.10645	0.475477	0.903788
TATGGAGGTTATTTCCGGC	0610031J06Rik_CCDS17469.1_ex1_3:88325681-88325703:+_5-1	0610031J06Rik	8.48029	10.3194	2.40964	1	1.21687	0.414999	0.821781	2.40964
GGTCGACCAGATCTAGAAA	0610031J06Rik_CCDS17469.1_ex3_3:88326418-88326440:-_5-5	0610031J06Rik	1	1	1.69288	1	1	0.590711	1	1.69288
GACAGCACCAATGCGTCCG	0610031J06Rik_CCDS17469.1_ex2_3:88326126-88326148:+_5-3	0610031J06Rik	5.46238	7.08561	1.74862	2.12532	1.29716	1.21543	0.770912	0.822757
CTGCTTCATATTCGGGCAG	0610031J06Rik_CCDS17469.1_ex1_3:88325718-88325740:+_5-2	0610031J06Rik	8.68664	4.69483	2.65653	3.31404	0.540466	1.24751	1.85026	0.801598
ACTTGGCCAAGGAGTACGG	0610031J06Rik_CCDS17469.1_ex2_3:88326175-88326197:-_5-4	0610031J06Rik	1.01935	9.27879	1	2.33929	9.1027	2.33929	0.109858	0.42748
AGTGCGATTTTCTGAGAAG	0610037L13Rik_CCDS18442.1_ex0_4:107890108-107890130:-_5-1	0610037L13Rik	3.49558	5.29417	4.37678	2.78308	1.51453	0.635875	0.660269	1.57264
GTCCTCGCCCACTGGCCGA	0610037L13Rik_CCDS18442.1_ex0_4:107890163-107890185:-_5-3	0610037L13Rik	7.85478	14.3172	23.4667	18.2127	1.82274	0.776107	0.548626	1.28848
GACTTCCGGTGGTACCTGA	0610037L13Rik_CCDS18442.1_ex0_4:107890181-107890203:+_5-4	0610037L13Rik	9.48626	16.9582	13.5275	14.7971	1.78766	1.09385	0.559389	0.914202
TTCGTGACGTTCTCCAGCG	0610037L13Rik_CCDS18442.1_ex0_4:107890141-107890163:-_5-2	0610037L13Rik	12.343	8.01425	5.90588	7.38739	0.649298	1.25085	1.54013	0.799454
TGGCAATACATCCGGCTGA	0610037L13Rik_CCDS18442.1_ex1_4:107891500-107891522:+_5-5	0610037L13Rik	14.8192	10.6421	15.8451	21.7313	0.718132	1.37149	1.3925	0.729136
GTCTATGGTGGCTACCCAG	0610040J01Rik_CCDS39092.1_ex1_5:63898294-63898316:-_5-3	0610040J01Rik	40.7487	23.3007	22.3199	14.0601	0.571815	0.629935	1.74882	1.58746
CCAGGAGCTATTGTCAACC	0610040J01Rik_CCDS39092.1_ex1_5:63898264-63898286:-_5-2	0610040J01Rik	7.23572	19.9286	8.74906	7.72023	2.7542	0.882407	0.363082	1.13326
TTTGAAAACCACTCTGAGG	0610040J01Rik_CCDS39092.1_ex1_5:63898540-63898562:+_5-5	0610040J01Rik	5.50107	5.54445	5.77846	5.38242	1.00788	0.931463	0.992177	1.07358
CCTTGAAGGAGAAGACTAC	0610040J01Rik_CCDS39092.1_ex1_5:63898338-63898360:+_5-4	0610040J01Rik	1	1	1	1	1	1	1	1
AGAGCAGAGGCAGTACAAC	0610040J01Rik_CCDS39092.1_ex1_5:63898115-63898137:+_5-1	0610040J01Rik	6.62956	10.056	8.03229	8.17987	1.51684	1.01837	0.659267	0.981958
ACGTACCTAAAAGCTGCAG	1100001G20Rik_CCDS36258.1_ex0_11:83747108-83747130:-_2-1	1100001G20Rik	5.88153	3.22612	5.42804	2.56911	0.548517	0.473304	1.8231	2.11281
GAGCTCTGCCGTGGTGACT	1100001G20Rik_CCDS36258.1_ex1_11:83749243-83749265:+_2-2	1100001G20Rik	18.7012	16.7146	16.0362	19.9561	0.893769	1.24444	1.11886	0.803573
AATTTCCATTCATTTTGGA	1110001A16Rik_CCDS50183.1_ex1_17:78919079-78919101:+_4-3	1110001A16Rik	1.02579	6.07792	6.15277	3.63104	5.92509	0.590147	0.168774	1.69449
ATGGATTTGTAATAAACTG	1110001A16Rik_CCDS50183.1_ex2_17:78919753-78919775:-_4-4	1110001A16Rik	8.55767	3.14709	3.53258	2.18872	0.36775	0.619581	2.71924	1.61399
GAGCTGAGTTTACCTTGGC	1110001A16Rik_CCDS50183.1_ex0_17:78918464-78918486:-_4-2	1110001A16Rik	16.7666	13.0856	10.2702	10.5811	0.780454	1.03027	1.28131	0.970619
AAAAGATGCACTCCAGCCA	1110001A16Rik_CCDS50183.1_ex0_17:78918451-78918473:+_4-1	1110001A16Rik	15.0707	19.461	8.69331	15.3677	1.29131	1.76776	0.774405	0.565688
CAACATGTAGCCCTTCATC	1110001J03Rik_CCDS20014.1_ex1_6:38539242-38539264:+_5-5	1110001J03Rik	12.9814	12.7431	10.764	6.56321	0.981647	0.609739	1.0187	1.64005
TTTCCGAGCACATCGGGTA	1110001J03Rik_CCDS20014.1_ex0_6:38534994-38535016:+_5-3	1110001J03Rik	10.7889	8.57408	8.58182	6.88813	0.794715	0.802642	1.25831	1.24588
TTGCCGGATGCTACTCAAA	1110001J03Rik_CCDS20014.1_ex1_6:38539224-38539246:-_5-4	1110001J03Rik	8.93814	4.6158	10.0791	9.07538	0.516416	0.900418	1.93642	1.11059
GCCTTAACGAGGTACCGGT	1110001J03Rik_CCDS20014.1_ex0_6:38534973-38534995:-_5-2	1110001J03Rik	15.4898	7.8496	15.5902	14.0839	0.506758	0.903377	1.97333	1.10696
CGGCCATATCGCGACACAG	1110001J03Rik_CCDS20014.1_ex0_6:38534950-38534972:+_5-1	1110001J03Rik	12.2785	18.2821	9.46583	16.7307	1.48895	1.76749	0.671613	0.565775
CACCGGCTCTGCTCAGGTG	1110004E09Rik_CCDS28321.1_ex6_16:90934576-90934598:-_5-4	1110004E09Rik	2.56699	4.14818	2.36186	1	1.61597	0.423395	0.618823	2.36186
GCACCTCGAAGCTGGTCCA	1110004E09Rik_CCDS28321.1_ex3_16:90927437-90927459:+_5-1	1110004E09Rik	8.61571	15.9176	1.00796	1	1.84751	0.992099	0.541268	1.00796
ATCGAAGAGCTGAAACTGA	1110004E09Rik_CCDS28321.1_ex5_16:90931072-90931094:-_5-3	1110004E09Rik	4.47576	1	1	1	0.223426	1	4.47576	1
AGGTGGCCCGCGTCTACAA	1110004E09Rik_CCDS28321.1_ex6_16:90934611-90934633:-_5-5	1110004E09Rik	1	1	1	1	1	1	1	1
TTTTACGAAGGACGAGATC	1110004E09Rik_CCDS28321.1_ex5_16:90931010-90931032:-_5-2	1110004E09Rik	1	1	1	2.74346	1	2.74346	1	0.364504
CAAACTGTCAGGACGGTAC	1110004F10Rik_CCDS21766.1_ex3_7:116103271-116103293:+_5-4	1110004F10Rik	14.6709	5.37321	8.72517	1.98268	0.36625	0.227236	2.73038	4.4007
TTTAGGTAGAAGATCATGA	1110004F10Rik_CCDS21766.1_ex4_7:116104206-116104228:+_5-5	1110004F10Rik	4.32744	1	4.98205	2.64043	0.231084	0.52999	4.32744	1.88683
CAACATCTCACTTCCGAAC	1110004F10Rik_CCDS21766.1_ex2_7:116101983-116102005:+_5-2	1110004F10Rik	23.3893	11.1822	13.4479	10.589	0.47809	0.787412	2.09165	1.26998
TCTTGAGACTCATGGGTGC	1110004F10Rik_CCDS21766.1_ex1_7:116099497-116099519:+_5-1	1110004F10Rik	27.439	13.573	18.2024	18.3791	0.49466	1.00971	2.02159	0.990388
AAGAAAATTAATGAAGAGC	1110004F10Rik_CCDS21766.1_ex3_7:116103221-116103243:+_5-3	1110004F10Rik	1	3.14709	2.05922	3.11592	3.14709	1.51315	0.317754	0.660871
CGTGGGGAACGGCACTGTC	1110007C09Rik_CCDS49260.1_ex3_13:49205261-49205283:-_5-2	1110007C09Rik	5.65584	5.61031	13.4081	4.80391	0.99195	0.358285	1.00812	2.79107
GCCTTGGGGTTCCGGAACT	1110007C09Rik_CCDS49260.1_ex3_13:49205328-49205350:+_5-5	1110007C09Rik	22.9379	10.9978	15.2717	8.48102	0.479459	0.555344	2.08568	1.80069
TACGAGGAGAGTAGCGGCT	1110007C09Rik_CCDS49260.1_ex3_13:49205188-49205210:+_5-1	1110007C09Rik	13.0716	10.3194	17.4379	10.2641	0.78945	0.588609	1.2667	1.69892
ACGCTGCTGTAGATGGCTC	1110007C09Rik_CCDS49260.1_ex3_13:49205279-49205301:+_5-3	1110007C09Rik	16.5409	7.88912	16.0044	15.2409	0.476945	0.952296	2.09668	1.05009
GTCACAGAGCCGTACGCGC	1110007C09Rik_CCDS49260.1_ex3_13:49205303-49205325:+_5-4	1110007C09Rik	25.2594	25.0197	27.4806	26.6605	0.990512	0.970157	1.00958	1.03076
GACGCGGCCTGGGACGACA	1110008F13Rik_CCDS16970.1_ex0_2:156863396-156863418:+_5-1	1110008F13Rik	6.9262	5.22172	12.9461	11.0645	0.753909	0.854656	1.32642	1.17006
TTCCGACAGATCATCGCTC	1110008F13Rik_CCDS16970.1_ex1_2:156865283-156865305:+_5-2	1110008F13Rik	19.1977	13.4742	14.0611	12.1898	0.701862	0.866917	1.42478	1.15351
TTCCCAAGAAGCCTCGCAA	1110008F13Rik_CCDS16970.1_ex1_2:156865332-156865354:-_5-4	1110008F13Rik	10.2601	11.0636	10.095	9.98673	1.07832	0.989275	0.927369	1.01084
CAGAACTCCTGCATTGATC	1110008F13Rik_CCDS16970.1_ex2_2:156872344-156872366:-_5-5	1110008F13Rik	23.1571	14.9429	13.4399	14.0363	0.645282	1.04437	1.54971	0.957511
GGGGCGTTTTGCCCTTGCG	1110008F13Rik_CCDS16970.1_ex1_2:156865320-156865342:+_5-3	1110008F13Rik	13.3747	17.854	16.753	18.5297	1.3349	1.10605	0.749118	0.904116
CTGTTTGGCACTAGCAAGG	1110008J03Rik_CCDS51635.1_ex0_5:120609904-120609926:-_5-2	1110008J03Rik	13.0265	8.71897	21.7066	14.2503	0.669326	0.656494	1.49404	1.52324
GAGGGGTCTCGGATGGCCG	1110008J03Rik_CCDS51635.1_ex0_5:120609886-120609908:-_5-1	1110008J03Rik	26.807	19.5861	26.3338	20.7803	0.730635	0.789112	1.36867	1.26725
GTGACTCATCGCAGTAGGA	1110008J03Rik_CCDS51635.1_ex0_5:120609924-120609946:+_5-3	1110008J03Rik	18.411	16.8331	13.1214	16.2315	0.914295	1.23703	1.09374	0.808389
GAGAGCCCTTCGGTGGTCC	1110008J03Rik_CCDS51635.1_ex1_5:120611456-120611478:+_5-4	1110008J03Rik	12.2527	18.506	15.853	20.6297	1.51036	1.30131	0.662092	0.768455
GTAACCGATCCAGAGGAGT	1110008J03Rik_CCDS51635.1_ex1_5:120611480-120611502:-_5-5	1110008J03Rik	5.11416	2.22502	2.49725	9.32897	0.435071	3.7357	2.29847	0.267688
TTTTAGAGTTTCCAACGGA	1110008L16Rik_CCDS49068.1_ex0_12:55304726-55304748:-_5-5	1110008L16Rik	6.50704	5.01097	1.74066	1	0.770084	0.574495	1.29856	1.74066
GTTATACCCTTCTCATCCG	1110008L16Rik_CCDS49068.1_ex0_12:55304532-55304554:+_5-4	1110008L16Rik	6.57798	11.5774	1.00796	1	1.76002	0.992099	0.568176	1.00796
CTAAGAAGAGGTCCCACAT	1110008L16Rik_CCDS49068.1_ex0_12:55304172-55304194:+_5-2	1110008L16Rik	10.5567	4.59604	3.49276	3.59934	0.435366	1.03051	2.29692	0.97039
CATCTTTGTTGGTTCCCGA	1110008L16Rik_CCDS49068.1_ex0_12:55304014-55304036:-_5-1	1110008L16Rik	6.15237	5.61689	4.16971	5.81036	0.912964	1.39347	1.09533	0.717634
GCAAAGAACAATGGCATCG	1110008L16Rik_CCDS49068.1_ex0_12:55304396-55304418:+_5-3	1110008L16Rik	7.8032	4.97804	1	2.22834	0.637948	2.22834	1.56752	0.448764
AACTCTTGTCTGGACCACC	1110008P14Rik_CCDS38103.1_ex0_2:32379477-32379499:-_5-3	1110008P14Rik	16.1218	5.39955	9.75254	7.05455	0.334922	0.723355	2.98577	1.38245
GTCATTCTTCTCCTCCAGG	1110008P14Rik_CCDS38103.1_ex0_2:32379462-32379484:+_5-2	1110008P14Rik	18.1208	14.5477	14.1726	11.7381	0.802817	0.828225	1.24561	1.2074
GAGTTGATCTGATCCAACA	1110008P14Rik_CCDS38103.1_ex0_2:32379493-32379515:+_5-4	1110008P14Rik	7.04227	26.8177	16.1955	15.225	3.80811	0.940078	0.262598	1.06374
GTTCGACTCCAGCAGCTCC	1110008P14Rik_CCDS38103.1_ex0_2:32379423-32379445:+_5-1	1110008P14Rik	8.6544	12.1767	21.3403	23.3163	1.407	1.09259	0.710734	0.915254
AGTTGATGGCAGCATACTC	1110008P14Rik_CCDS38103.1_ex0_2:32379515-32379537:+_5-5	1110008P14Rik	11.6723	9.87813	2.88749	8.9248	0.846288	3.09085	1.18163	0.323535
GAAGTGCTCATGGAGAGGT	1110012L19Rik_CCDS30174.1_ex0_X:70388075-70388097:+_5-1	1110012L19Rik	8.24814	7.27002	6.90139	4.47106	0.881413	0.64785	1.13454	1.54357
CAGGAGAAAAGTACGGCAG	1110012L19Rik_CCDS30174.1_ex0_X:70388133-70388155:+_5-3	1110012L19Rik	2.76045	4.74752	4.28121	3.29027	1.71984	0.768538	0.58145	1.30117
GAGACCTTAACTGCTGAGG	1110012L19Rik_CCDS30174.1_ex1_X:70388906-70388928:+_5-5	1110012L19Rik	1	1	1	1	1	1	1	1
CAGATTCAGACCTTACTAC	1110012L19Rik_CCDS30174.1_ex0_X:70388111-70388133:+_5-2	1110012L19Rik	18.5077	17.4259	14.8257	15.4628	0.941544	1.04297	1.06208	0.958798
CTCCAATGTCAATAAGTCC	1110012L19Rik_CCDS30174.1_ex1_X:70388868-70388890:-_5-4	1110012L19Rik	1.02579	10.056	7.14032	10.3433	9.8031	1.44858	0.102009	0.690329
ATGACCAAATGTGCCGCAC	1110017D15Rik_CCDS38717.1_ex4_4:41511504-41511526:-_5-3	1110017D15Rik	13.7681	12.045	24.1994	17.3806	0.874848	0.718223	1.14306	1.39232
CACCGCCACGTGGACCCTG	1110017D15Rik_CCDS38717.1_ex4_4:41511537-41511559:-_5-4	1110017D15Rik	21.7965	16.6948	18.0352	17.2617	0.76594	0.957112	1.30559	1.04481
TCAGTTCGAGGAATGCCGT	1110017D15Rik_CCDS38717.1_ex2_4:41507557-41507579:-_5-1	1110017D15Rik	13.7874	11.6959	20.7987	22.7694	0.848303	1.09475	1.17882	0.91345
GACCCACCACTATGGGCCT	1110017D15Rik_CCDS38717.1_ex5_4:41517051-41517073:-_5-5	1110017D15Rik	11.0017	16.4248	8.91631	10.3592	1.49294	1.16183	0.669821	0.860714
CCTATAAGAGTTCCATATC	1110017D15Rik_CCDS38717.1_ex4_4:41511476-41511498:-_5-2	1110017D15Rik	4.17912	1	3.98654	8.03723	0.239285	2.01609	4.17912	0.496009
ATATTACCTGGGAAGGCAA	1110032A03Rik_CCDS23173.1_ex2_9:50764688-50764710:+_5-2	1110032A03Rik	13.6971	5.74862	9.80829	3.60726	0.419694	0.367777	2.38269	2.71904
ATATGATGCAAACTACAGC	1110032A03Rik_CCDS23173.1_ex1_9:50764246-50764268:-_5-1	1110032A03Rik	1.877	1	3.15827	2.23627	0.532765	0.708068	1.877	1.41229
TGGTTCCAGTTTCCTACCA	1110032A03Rik_CCDS23173.1_ex2_9:50764747-50764769:+_5-3	1110032A03Rik	10.6663	8.80459	7.24385	5.94508	0.825456	0.820707	1.21145	1.21846
TCCTATTCGAACCGTACCC	1110032A03Rik_CCDS23173.1_ex2_9:50764764-50764786:-_5-4	1110032A03Rik	8.00955	17.9001	7.57834	9.54294	2.23484	1.25924	0.447459	0.794131
CATCCGTACTGTAAAAACT	1110032A03Rik_CCDS23173.1_ex2_9:50764807-50764829:+_5-5	1110032A03Rik	1.00645	4.89242	1	2.18872	4.86107	2.18872	0.205716	0.456888
CGGGTACCTGCGTGGGCTG	1110032F04Rik_CCDS50931.1_ex0_3:68870016-68870038:-_5-3	1110032F04Rik	15.5995	13.1515	15.6858	8.48894	0.843071	0.541187	1.18614	1.84779
ACCTCGTCGCGCAGCAGAG	1110032F04Rik_CCDS50931.1_ex0_3:68870135-68870157:-_5-4	1110032F04Rik	14.6709	15.5422	15.9088	12.8714	1.05939	0.809072	0.943937	1.23598
ACTCACTGTTGGATAGTGG	1110032F04Rik_CCDS50931.1_ex0_3:68870173-68870195:+_5-5	1110032F04Rik	11.1242	14.0538	20.6076	18.3553	1.26335	0.890707	0.791545	1.1227
ACGCCTTTCTGGACAACGT	1110032F04Rik_CCDS50931.1_ex0_3:68869912-68869934:+_5-2	1110032F04Rik	16.5667	11.0373	12.3409	14.8367	0.666232	1.20224	1.50098	0.831779
TGCGACTCGGCCAACGCCA	1110032F04Rik_CCDS50931.1_ex0_3:68869863-68869885:+_5-1	1110032F04Rik	28.0258	25.0263	20.4961	35.6314	0.892974	1.73845	1.11985	0.575226
GGCTTGATCCTTCTTCGAA	1110034G24Rik_CCDS50727.1_ex1_2:132750266-132750288:+_5-3	1110034G24Rik	4.4822	31.6124	9.68086	30.409	7.05288	3.14114	0.141786	0.318356
TGGGATGCTTCATAACTGC	1110034G24Rik_CCDS50727.1_ex0_2:132692030-132692052:-_5-1	1110034G24Rik	6.35873	21.9506	9.01984	31.7403	3.45204	3.51894	0.289684	0.284176
CTTCTTCGACTACTGATCC	1110034G24Rik_CCDS50727.1_ex0_2:132692110-132692132:+_5-2	1110034G24Rik	4.7079	33.7925	5.60325	34.2525	7.17782	6.11297	0.139318	0.163587
AGACAATCTCTGAGCTCGA	1110034G24Rik_CCDS50727.1_ex1_2:132750416-132750438:+_5-5	1110034G24Rik	3.8438	26.0735	4.24935	30.4723	6.78326	7.17106	0.147422	0.139449
GCTTCATAGAATCTATCCA	1110034G24Rik_CCDS50727.1_ex1_2:132750330-132750352:-_5-4	1110034G24Rik	1.06449	24.0779	1.77252	20.4871	22.6193	11.5582	0.0442101	0.0865187
CGGGTCATACGTCATAGGA	1110037F02Rik_CCDS38693.1_ex7_4:11513146-11513168:-_5-2	1110037F02Rik	5.05612	5.57738	7.6978	7.49042	1.10309	0.973059	0.906541	1.02769
TCTAACATCTGGACACCGC	1110037F02Rik_CCDS38693.1_ex10_4:11521176-11521198:-_5-5	1110037F02Rik	9.3315	5.43248	1	2.14117	0.582166	2.14117	1.71772	0.467034
GGTACGGGTCATCCCGCTC	1110037F02Rik_CCDS38693.1_ex7_4:11514134-11514156:-_5-3	1110037F02Rik	9.22832	11.4325	1.33449	3.71821	1.23885	2.78623	0.807203	0.358907
GAAGTCCGAGTTATACCCC	1110037F02Rik_CCDS38693.1_ex1_4:11494814-11494836:+_5-1	1110037F02Rik	1.00645	4.02963	1.46988	4.47899	4.00381	3.04718	0.249762	0.328173
GGTGTACTGCAAGCCACGA	1110037F02Rik_CCDS38693.1_ex9_4:11518998-11519020:+_5-4	1110037F02Rik	2.49606	4.60921	1.00796	4.162	1.8466	4.12911	0.541537	0.242183
GTTCGGAAGCATCTCCAGA	1110051M20Rik_CCDS16431.1_ex6_2:91383745-91383767:+_5-3	1110051M20Rik	10.3246	8.19208	10.5171	5.14467	0.793455	0.489173	1.26031	2.04427
GCTTACTCAGAAAGCCGCC	1110051M20Rik_CCDS16431.1_ex5_2:91304748-91304770:-_5-1	1110051M20Rik	6.99713	18.9407	16.7211	11.4449	2.70692	0.684457	0.369423	1.46101
TTGTGCCCAGACTTCCCGC	1110051M20Rik_CCDS16431.1_ex5_2:91304771-91304793:-_5-2	1110051M20Rik	23.0024	13.1712	17.3662	14.4722	0.572602	0.833352	1.74641	1.19997
GTTTTAACAGCGTATGCCA	1110051M20Rik_CCDS16431.1_ex6_2:91383839-91383861:-_5-4	1110051M20Rik	8.60926	17.8342	7.15624	8.94858	2.07151	1.25046	0.482739	0.799707
GGGAGGATATTAGCCAGTA	1110051M20Rik_CCDS16431.1_ex7_2:91421890-91421912:-_5-5	1110051M20Rik	5.35276	11.6762	2.08312	5.90545	2.18134	2.83491	0.458435	0.352745
GACGTCTTGTTTCTCAAAG	1110057K04Rik_CCDS25798.1_ex0_12:8220700-8220722:-_5-1	1110057K04Rik	12.3688	6.3282	10.7481	5.61224	0.511628	0.522163	1.95455	1.91511
CGTAGAATGCGGAATAGCC	1110057K04Rik_CCDS25798.1_ex1_12:8227225-8227247:-_5-2	1110057K04Rik	21.2613	17.0636	14.4514	8.16402	0.802569	0.564931	1.246	1.77013
GATTATCCATACCGGGAAG	1110057K04Rik_CCDS25798.1_ex1_12:8227284-8227306:-_5-4	1110057K04Rik	5.73967	4.76069	11.1064	9.79653	0.829437	0.882059	1.20564	1.13371
CATATAGGTGCCTACGGAA	1110057K04Rik_CCDS25798.1_ex2_12:8238558-8238580:-_5-5	1110057K04Rik	15.9993	19.8496	14.8735	15.7005	1.24065	1.05561	0.806026	0.947323
TGTACAAGGCCTTTGCAAA	1110057K04Rik_CCDS25798.1_ex1_12:8227249-8227271:-_5-3	1110057K04Rik	3.6052	7.07243	3.85911	5.74696	1.96173	1.48919	0.509754	0.671505
GGCAGCTTTGACTTCTTAA	1110058L19Rik_CCDS14852.1_ex1_1:24003212-24003234:+_5-4	1110058L19Rik	9.41533	4.5697	6.29612	2.97328	0.485346	0.472239	2.06038	2.11757
ACCACTACTCACTCTGCAG	1110058L19Rik_CCDS14852.1_ex1_1:24003144-24003166:+_5-2	1110058L19Rik	25.5173	13.8759	14.6106	9.66974	0.543785	0.661829	1.83896	1.51097
CTCGGTCGTTTTGACTCAC	1110058L19Rik_CCDS14852.1_ex1_1:24003190-24003212:-_5-3	1110058L19Rik	10.0731	8.25794	9.89589	7.04663	0.819803	0.712076	1.2198	1.40434
GGGCTTGCTTCGCAGGCTC	1110058L19Rik_CCDS14852.1_ex1_1:24003231-24003253:+_5-5	1110058L19Rik	16.5667	22.7607	9.872	10.6524	1.37388	1.07905	0.727868	0.926738
ACATCATCCGGAAACTCTG	1110058L19Rik_CCDS14852.1_ex0_1:23996344-23996366:+_5-1	1110058L19Rik	11.3757	7.04609	10.6286	15.1141	0.619399	1.42202	1.61447	0.703224
TTAATGCAAAACTTCATGA	1110059E24Rik_CCDS29699.1_ex2_19:21619190-21619212:-_5-5	1110059E24Rik	1	1	3.5724	1	1	0.279924	1	3.5724
TGTTTACAAAAGACAGTAA	1110059E24Rik_CCDS29699.1_ex1_19:21598840-21598862:-_5-2	1110059E24Rik	1	1	1	1	1	1	1	1
ACTTCTTAGGCTTTGACAG	1110059E24Rik_CCDS29699.1_ex2_19:21619109-21619131:+_5-3	1110059E24Rik	24.3759	4.8068	9.30655	11.2151	0.197195	1.20507	5.07113	0.829825
TTGAAGTTTGTGCCAAATG	1110059E24Rik_CCDS29699.1_ex1_19:21598779-21598801:-_5-1	1110059E24Rik	6.90685	9.43686	6.8775	9.36067	1.3663	1.36106	0.731901	0.734723
CTGCAAAGAAGTTCTTGAG	1110059E24Rik_CCDS29699.1_ex2_19:21619156-21619178:-_5-4	1110059E24Rik	16.4313	16.8595	6.19259	9.49539	1.02606	1.53335	0.974606	0.652168
GGGCCCACCGTAGAGACCA	1110059G10Rik_CCDS23650.1_ex2_9:122950804-122950826:-_5-4	1110059G10Rik	9.51205	8.02743	11.0427	10.1531	0.843921	0.919443	1.18494	1.08762
GATGAACAGCCTCAAGTAG	1110059G10Rik_CCDS23650.1_ex1_9:122948997-122949019:-_5-3	1110059G10Rik	7.5517	4.45114	6.4554	5.99263	0.589423	0.928312	1.69658	1.07722
AAGTAGTGGTTTTAAAAAA	1110059G10Rik_CCDS23650.1_ex1_9:122948984-122949006:-_5-2	1110059G10Rik	1	1	1	1	1	1	1	1
AGAGAGTCGGCTACAAGGA	1110059G10Rik_CCDS23650.1_ex2_9:122950824-122950846:-_5-5	1110059G10Rik	15.4576	11.5905	13.8381	13.9888	0.749828	1.01089	1.33364	0.989232
GGAGACCTAACAGCTGAAG	1110059G10Rik_CCDS23650.1_ex1_9:122948964-122948986:-_5-1	1110059G10Rik	7.46787	7.50712	5.78642	8.03723	1.00526	1.38898	0.994772	0.719952
GAATTCTCTGGAAGCCCTA	1110059M19Rik_CCDS53063.1_ex1_X:45092146-45092168:+_5-4	1110059M19Rik	1.00645	11.0439	8.32697	5.04165	10.9731	0.605461	0.0911318	1.65163
GCAGAAATAAACAGCTCAG	1110059M19Rik_CCDS53063.1_ex1_X:45092074-45092096:+_5-3	1110059M19Rik	9.9828	8.81118	7.64205	5.59639	0.882636	0.732314	1.13297	1.36553
TCCGATCATCAGTGCCATA	1110059M19Rik_CCDS53063.1_ex1_X:45092161-45092183:-_5-5	1110059M19Rik	8.4416	23.2349	11.8073	10.6603	2.75242	0.902862	0.363316	1.10759
GGGACTCTTCCTCAATAGC	1110059M19Rik_CCDS53063.1_ex1_X:45092045-45092067:-_5-2	1110059M19Rik	8.15786	4.12184	12.2134	12.0393	0.505259	0.985738	1.97918	1.01447
TAGCAGGTGTTAGTGTAAG	1110059M19Rik_CCDS53063.1_ex1_X:45092030-45092052:-_5-1	1110059M19Rik	1.0129	4.49066	6.989	8.20365	4.43348	1.17379	0.225556	0.851938
AGCCATCTGTATCGGCCAG	1110065P20Rik_CCDS51298.1_ex0_4:124849910-124849932:-_2-2	1110065P20Rik	2.16718	8.11963	4.47234	5.26355	3.74663	1.17691	0.266907	0.849683
TCCTTTGGAAGGCCACCTC	1110065P20Rik_CCDS51298.1_ex0_4:124849894-124849916:+_2-1	1110065P20Rik	1	1	3.883	7.12587	1	1.83515	1	0.544916
AGCTCGTGCCGAAGCACGC	1190002N15Rik_CCDS40725.1_ex2_9:94537688-94537710:+_5-5	1190002N15Rik	9.39598	21.9967	13.9496	7.51419	2.34107	0.538666	0.427155	1.85644
GCGCTTGAGCACCACGCGC	1190002N15Rik_CCDS40725.1_ex2_9:94537542-94537564:+_5-3	1190002N15Rik	9.7313	18.8946	19.4209	10.5969	1.94163	0.545645	0.515032	1.83269
ACGTGTACTTCGCGCAGTA	1190002N15Rik_CCDS40725.1_ex2_9:94537586-94537608:-_5-4	1190002N15Rik	12.6654	13.1646	11.1303	9.55879	1.03942	0.858806	0.962077	1.16441
GCGTCTCAACGGCGACGTG	1190002N15Rik_CCDS40725.1_ex2_9:94537414-94537436:-_5-2	1190002N15Rik	9.72486	15.1734	22.7181	24.3782	1.56027	1.07307	0.640915	0.931903
CGCCGCTACGCGGAGACCA	1190002N15Rik_CCDS40725.1_ex2_9:94537314-94537336:-_5-1	1190002N15Rik	12.9169	14.5148	10.31	20.3841	1.12371	1.97711	0.889912	0.505788
TCTCAGAGCGCTTCTCCCC	1190003K10Rik_CCDS56887.1_ex1_13:64485859-64485881:+_5-3	1190003K10Rik	24.6532	14.2909	28.6593	23.4193	0.579676	0.817161	1.7251	1.22375
GAAGAATGGAAGGAGAGGC	1190003K10Rik_CCDS56887.1_ex0_13:64481829-64481851:-_5-1	1190003K10Rik	6.38452	3.19319	1	1	0.500146	1	1.99942	1
ACTGGAAGAAGATCGCCAG	1190003K10Rik_CCDS56887.1_ex1_13:64485875-64485897:-_5-4	1190003K10Rik	13.0394	9.25245	10.9312	12.0393	0.709576	1.10136	1.40929	0.907965
CCATTCTTCTCTAAGCCTG	1190003K10Rik_CCDS56887.1_ex0_13:64481841-64481863:+_5-2	1190003K10Rik	16.8956	20.3238	12.0382	17.6579	1.2029	1.46682	0.831323	0.681746
CAGACTTGTTACCGAGAAC	1190003K10Rik_CCDS56887.1_ex1_13:64485892-64485914:-_5-5	1190003K10Rik	6.94554	5.43248	6.37576	10.4781	0.782154	1.64342	1.27852	0.608487
CCATGCCCGTCGGGGTTGG	1190005I06Rik_CCDS52690.1_ex1_8:120611220-120611242:+_5-1	1190005I06Rik	34.5001	27.2129	30.3875	21.0894	0.788777	0.694015	1.26778	1.44089
AGCAACAACAACCACGACG	1190005I06Rik_CCDS52690.1_ex1_8:120611293-120611315:-_5-3	1190005I06Rik	15.6382	11.8672	8.14379	7.60136	0.758859	0.933394	1.31777	1.07136
CAGGACGGGGGCCTCGTCG	1190005I06Rik_CCDS52690.1_ex1_8:120611281-120611303:+_5-2	1190005I06Rik	13.3941	7.78374	6.4793	6.65039	0.581133	1.02641	1.72078	0.974274
CCGCAGAGGCGACGCCATG	1190005I06Rik_CCDS52690.1_ex2_8:120628494-120628516:-_5-5	1190005I06Rik	16.0767	35.4258	21.3483	26.9537	2.20356	1.26257	0.453812	0.792033
CCCTCCTGTCTGAAAGGTA	1190005I06Rik_CCDS52690.1_ex2_8:120628466-120628488:-_5-4	1190005I06Rik	16.9279	18.618	12.3966	21.1132	1.09984	1.70314	0.909222	0.587151
ATAGTACCAATGCACCACC	1190007I07Rik_CCDS48653.1_ex1_10:82622719-82622741:+_5-5	1190007I07Rik	2.7411	4.53018	7.28367	3.80538	1.65268	0.522454	0.605076	1.91404
CTGAAATTCCACCAAAGCC	1190007I07Rik_CCDS48653.1_ex0_10:82620189-82620211:-_5-2	1190007I07Rik	14.9804	9.83862	9.33841	7.38739	0.656766	0.791076	1.52261	1.2641
GCTCCGTTTTGAGTTCTCC	1190007I07Rik_CCDS48653.1_ex0_10:82620171-82620193:+_5-1	1190007I07Rik	8.53833	4.91876	11.9347	12.3721	0.57608	1.03665	1.73587	0.964647
TGGTACTATCGGCCTGACC	1190007I07Rik_CCDS48653.1_ex1_10:82622707-82622729:-_5-4	1190007I07Rik	14.9546	14.4753	6.40762	6.69793	0.967947	1.04531	1.03311	0.956656
CTACAGCACTCACCAGGTC	1190007I07Rik_CCDS48653.1_ex1_10:82622694-82622716:+_5-3	1190007I07Rik	13.2973	11.1624	4.75109	8.87726	0.839449	1.86847	1.19126	0.535198
TGTAATTAGGGGGCAGAGC	1200011I18Rik_CCDS27283.1_ex6_14:76107423-76107445:+_5-5	1200011I18Rik	3.31502	10.4248	9.29859	5.48544	3.14471	0.589922	0.317994	1.69514
TTGGACCAATGCCTGCAAA	1200011I18Rik_CCDS27283.1_ex3_14:76099139-76099161:-_5-1	1200011I18Rik	14.026	7.6586	8.68535	8.75046	0.546028	1.0075	1.83141	0.992559
CCTCCTGGGTTTAAGAAGC	1200011I18Rik_CCDS27283.1_ex5_14:76106070-76106092:-_5-4	1200011I18Rik	13.1748	16.1416	10.6604	11.5479	1.22518	1.08325	0.816204	0.923149
TTCTAATTTATCACCTGGG	1200011I18Rik_CCDS27283.1_ex5_14:76106039-76106061:+_5-3	1200011I18Rik	15.8445	7.52688	10.8755	13.5291	0.475047	1.244	2.10506	0.803857
GAGACTTAATGAAACCAGG	1200011I18Rik_CCDS27283.1_ex4_14:76102507-76102529:+_5-2	1200011I18Rik	5.92023	5.12293	3.98654	11.7381	0.865327	2.94444	1.15563	0.339623
GCTCGAAAGTGGAAGCGCT	1200014J11Rik_CCDS24994.1_ex2_11:73053451-73053473:-_5-4	1200014J11Rik	7.55815	9.68055	9.62511	5.34279	1.28081	0.555089	0.780756	1.80151
ACATCCCGCTGAATGCGAC	1200014J11Rik_CCDS24994.1_ex8_11:73070815-73070837:-_5-5	1200014J11Rik	12.3107	3.23271	11.2816	12.2453	0.262593	1.08542	3.80818	0.921304
GGGATCGATGTCACCTCCA	1200014J11Rik_CCDS24994.1_ex1_11:73049903-73049925:+_5-3	1200014J11Rik	4.20492	4.00987	2.83174	3.13177	0.953615	1.10595	1.04864	0.904198
GGCGAGCTGGAAATCGTGC	1200014J11Rik_CCDS24994.1_ex0_11:73048031-73048053:+_5-1	1200014J11Rik	4.7208	4.54335	5.44396	6.08772	0.962411	1.11825	1.03906	0.894253
CCTTTAGGGAGCGCCGCAC	1200014J11Rik_CCDS24994.1_ex0_11:73048050-73048072:-_5-2	1200014J11Rik	15.8896	21.3644	10.6923	13.648	1.34455	1.27643	0.743745	0.783434
GGGTCCCACTCATACACCC	1300002K09Rik_CCDS18141.1_ex8_4:45870807-45870829:-_5-3	1300002K09Rik	17.1536	10.3194	18.7918	9.55879	0.60159	0.508669	1.66226	1.96592
GGGGACTTTTAGTAACCGA	1300002K09Rik_CCDS18141.1_ex3_4:45864887-45864909:+_5-1	1300002K09Rik	3.57941	6.11086	9.17116	4.70881	1.70722	0.513437	0.585746	1.94766
CGTCTCGTTCATATGGGTG	1300002K09Rik_CCDS18141.1_ex9_4:45873726-45873748:-_5-5	1300002K09Rik	11.3434	16.1679	25.4418	19.6154	1.42531	0.77099	0.701602	1.29703
ACTCAATGACGATGAACTG	1300002K09Rik_CCDS18141.1_ex9_4:45873643-45873665:-_5-4	1300002K09Rik	11.0468	3.21295	5.40414	5.39034	0.290849	0.997446	3.43821	1.00256
CCCACTGAGGAACCGTCAG	1300002K09Rik_CCDS18141.1_ex3_4:45864976-45864998:-_5-2	1300002K09Rik	7.88703	11.9001	3.31755	11.5479	1.50882	3.48086	0.662771	0.287286
GAATATGAACAGTGCTACC	1300017J02Rik_CCDS23452.1_ex10_9:103272570-103272592:-_5-3	1300017J02Rik	6.39742	3.08122	8.16768	4.09067	0.481636	0.500836	2.07626	1.99666
CCAAAGTATGGTTCCCGGG	1300017J02Rik_CCDS23452.1_ex12_9:103277473-103277495:+_5-4	1300017J02Rik	12.904	2.5214	15.3991	10.4464	0.195397	0.678376	5.11778	1.47411
AGATGTCCCGGATGCACTC	1300017J02Rik_CCDS23452.1_ex15_9:103282496-103282518:+_5-5	1300017J02Rik	22.551	27.8122	22.9092	28.2059	1.23331	1.2312	0.810829	0.812215
CCTCTTTTAAGATTCCGAA	1300017J02Rik_CCDS23452.1_ex9_9:103269610-103269632:+_5-1	1300017J02Rik	9.44112	13.9286	5.08558	6.31754	1.47531	1.24225	0.677822	0.804993
TTTGGCTCCCCTCACGGGG	1300017J02Rik_CCDS23452.1_ex9_9:103269723-103269745:-_5-2	1300017J02Rik	23.8536	16.135	17.7644	30.8369	0.676418	1.73588	1.47838	0.576077
AGAACAGAAGACTCGATAA	1500009L16Rik_CCDS48656.1_ex2_10:83757442-83757464:+_4-1	1500009L16Rik	1	1.00659	1.00796	1	1.00659	0.992099	0.993457	1.00796
GATAACGGAAGACGACAAG	1500009L16Rik_CCDS48656.1_ex2_10:83757456-83757478:+_4-2	1500009L16Rik	1	1	1	1	1	1	1	1
TTTCTTAAAGAAACTATGG	1500009L16Rik_CCDS48656.1_ex3_10:83758123-83758145:+_4-3	1500009L16Rik	1	1	1	1	1	1	1	1
ACTATGGAGGAGTGTATGT	1500009L16Rik_CCDS48656.1_ex3_10:83758135-83758157:+_4-4	1500009L16Rik	5.05612	10.2865	2.64857	5.34279	2.03446	2.01724	0.491531	0.495727
GCATTCTGCATAGCCTTGT	1500012F01Rik_CCDS38338.1_ex2_2:167065732-167065754:-_2-2	1500012F01Rik	36.7119	33.2656	25.6728	27.9523	0.906124	1.08879	1.1036	0.91845
CCTTGTGGGGCTGGGCAGC	1500012F01Rik_CCDS38338.1_ex2_2:167065719-167065741:-_2-1	1500012F01Rik	15.0126	7.24367	15.4389	20.5188	0.482505	1.32903	2.07252	0.752427
CATTAGTCTTTGACGGGAC	1500015O10Rik_CCDS14925.1_ex2_1:43738562-43738584:-_5-1	1500015O10Rik	6.17172	5.70251	16.0442	10.9456	0.923975	0.682218	1.08228	1.46581
CTGTACCTCAGGCCGCGTA	1500015O10Rik_CCDS14925.1_ex2_1:43738654-43738676:-_5-4	1500015O10Rik	28.9092	32.9824	25.8241	27.4292	1.14089	1.06216	0.876506	0.94148
TACCAGCAGTTCCTCTACA	1500015O10Rik_CCDS14925.1_ex2_1:43738681-43738703:+_5-5	1500015O10Rik	17.9983	16.7211	9.66493	10.4067	0.92904	1.07675	1.07638	0.928718
ACAGCTGTGGGACCGTACG	1500015O10Rik_CCDS14925.1_ex2_1:43738641-43738663:+_5-3	1500015O10Rik	10.4729	8.21842	13.6948	21.3826	0.784734	1.56137	1.27432	0.640463
GCGTGCCAAACGACAGCTG	1500015O10Rik_CCDS14925.1_ex2_1:43738629-43738651:+_5-2	1500015O10Rik	11.6917	12.4994	6.70229	11.3339	1.06909	1.69106	0.935376	0.591347
GTGGCCCGCTGTATACCCT	1600002H07Rik_CCDS28479.1_ex6_17:24219898-24219920:+_5-3	1600002H07Rik	14.1421	7.51371	17.0317	13.1329	0.531301	0.771083	1.88217	1.29688
CAGCCTCCTGGAAACGCGC	1600002H07Rik_CCDS28479.1_ex8_17:24220527-24220549:+_5-5	1600002H07Rik	12.8073	7.07902	8.18361	7.41909	0.552735	0.906579	1.80918	1.10305
GCTAACGTTTACCTGGACT	1600002H07Rik_CCDS28479.1_ex7_17:24220239-24220261:+_5-4	1600002H07Rik	4.95295	1	7.34738	7.40324	0.2019	1.0076	4.95295	0.992455
GGGTATGGACCAGACCTCA	1600002H07Rik_CCDS28479.1_ex6_17:24219795-24219817:-_5-1	1600002H07Rik	4.21781	15.6608	7.78541	9.33689	3.71301	1.19928	0.269323	0.833833
TGATCGTAGTCTGTGCTCA	1600002H07Rik_CCDS28479.1_ex6_17:24219858-24219880:+_5-2	1600002H07Rik	10.1053	13.9484	6.3678	9.0833	1.3803	1.42644	0.72448	0.701045
TCGCTTTACTTCCTCATCC	1600002K03Rik_CCDS24012.1_ex0_10:80173145-80173167:+_5-4	1600002K03Rik	14.4194	10.3655	21.0934	12.6415	0.718859	0.599312	1.39109	1.66858
AACGGGAGGCTCCCGGACA	1600002K03Rik_CCDS24012.1_ex0_10:80173064-80173086:+_5-2	1600002K03Rik	14.2195	13.8364	17.3981	14.9635	0.97306	0.860067	1.02769	1.1627
TTATAACCACACAAACGGG	1600002K03Rik_CCDS24012.1_ex0_10:80173051-80173073:+_5-1	1600002K03Rik	1	3.06147	5.97756	6.64246	3.06147	1.11123	0.326641	0.899901
GCTAACGCACCTAAAAGCC	1600002K03Rik_CCDS24012.1_ex0_10:80173163-80173185:-_5-5	1600002K03Rik	5.46883	9.70031	4.44845	7.25267	1.77375	1.63038	0.563779	0.613354
GCTTGTTCTACGTAATCAC	1600002K03Rik_CCDS24012.1_ex0_10:80173107-80173129:+_5-3	1600002K03Rik	6.29424	4.62897	2.50521	8.2195	0.73543	3.28096	1.35975	0.304789
TCCTATCCCGACCGGTCGC	1600012H06Rik_CCDS37444.1_ex0_17:14943924-14943946:-_5-5	1600012H06Rik	8.13852	9.00876	10.541	5.81036	1.10693	0.551216	0.9034	1.81417
TACTTGCGGTTGAACCATG	1600012H06Rik_CCDS37444.1_ex0_17:14943759-14943781:+_5-2	1600012H06Rik	1.56102	5.91986	9.84811	6.48397	3.7923	0.658397	0.263693	1.51884
AGTGCTGTCCGACACGTAC	1600012H06Rik_CCDS37444.1_ex0_17:14943825-14943847:-_5-3	1600012H06Rik	84.3665	94.5695	87.5378	85.4784	1.12094	0.976474	0.892112	1.02409
TCCTTCTGCACGTGGTCCA	1600012H06Rik_CCDS37444.1_ex0_17:14943712-14943734:+_5-1	1600012H06Rik	9.41533	22.1218	16.2672	16.5564	2.34955	1.01778	0.425613	0.982531
AGTCGTCGAAGCTCGGGTG	1600012H06Rik_CCDS37444.1_ex0_17:14943847-14943869:-_5-4	1600012H06Rik	7.34535	7.88912	3.77947	4.33634	1.07403	1.14734	0.931074	0.87158
GTTCGACCCATCTACAGAG	1600014C23Rik_CCDS57097.1_ex1_17:45733705-45733727:-_5-5	1600014C23Rik	11.0339	11.2678	15.853	12.594	1.0212	0.794421	0.979241	1.25878
GGGGCACTGGCCGAAAGAC	1600014C23Rik_CCDS57097.1_ex1_17:45733670-45733692:+_5-4	1600014C23Rik	7.41628	5.29417	7.45092	6.90398	0.713858	0.926595	1.40084	1.07922
CCTTTCCGGGACTCCCAGT	1600014C23Rik_CCDS57097.1_ex1_17:45733635-45733657:+_5-2	1600014C23Rik	16.1734	31.2963	20.4244	22.8091	1.93505	1.11675	0.516782	0.895452
AGGCAGGGTTCCTTGCTGG	1600014C23Rik_CCDS57097.1_ex1_17:45733594-45733616:+_5-1	1600014C23Rik	19.0494	19.6191	15.7336	18.2206	1.0299	1.15807	0.970965	0.863505
CCAGTGGGTAGACTGGGGA	1600014C23Rik_CCDS57097.1_ex1_17:45733649-45733671:+_5-3	1600014C23Rik	19.7975	24.2689	28.0461	33.3332	1.22586	1.18852	0.815755	0.841385
CCACTTCTGAGACTGACGC	1600014K23Rik_CCDS53125.1_ex0_X:85269777-85269799:-_5-2	1600014K23Rik	35.0482	9.58834	21.619	18.078	0.273576	0.836205	3.65529	1.19588
CCCTGGCGCTCGGTCAGCA	1600014K23Rik_CCDS53125.1_ex0_X:85269824-85269846:-_5-3	1600014K23Rik	39.5751	13.9089	30.9768	37.5809	0.351455	1.21319	2.84531	0.824271
TTATTGCAGAACGAGGCCA	1600014K23Rik_CCDS53125.1_ex0_X:85269719-85269741:-_5-1	1600014K23Rik	6.35228	12.2426	8.71721	10.7317	1.92727	1.23109	0.518868	0.812289
ATGGAGTGCGCGTTCCATC	1600014K23Rik_CCDS53125.1_ex0_X:85269909-85269931:+_5-5	1600014K23Rik	9.00907	6.27551	9.33044	13.537	0.696577	1.45085	1.43559	0.689253
TTGATTGGCAATTCTCCCA	1600014K23Rik_CCDS53125.1_ex0_X:85269855-85269877:-_5-4	1600014K23Rik	14.6451	13.6454	8.98002	13.1487	0.93174	1.46422	1.07326	0.682958
GTTTCTAGCTATAACGTAG	1600015I10Rik_CCDS39484.2_ex0_6:48931003-48931025:+_5-5	1600015I10Rik	6.19751	3.3315	5.38025	3.74991	0.537554	0.696976	1.86028	1.43477
CTCAGGTCTGCGAATACCC	1600015I10Rik_CCDS39484.2_ex0_6:48930189-48930211:-_5-1	1600015I10Rik	13.5424	5.09659	12.4285	8.76631	0.376343	0.705341	2.65715	1.41775
GCCTGGGCACGATCCATCC	1600015I10Rik_CCDS39484.2_ex0_6:48930492-48930514:+_5-3	1600015I10Rik	21.5901	17.169	23.6658	23.3163	0.795224	0.985229	1.25751	1.01499
CTCGCATGTAGATTGGTAA	1600015I10Rik_CCDS39484.2_ex0_6:48930458-48930480:-_5-2	1600015I10Rik	6.262	14.2382	15.8451	19.0369	2.27374	1.20144	0.439804	0.832337
ATCTACCGTACGCTGACAG	1600015I10Rik_CCDS39484.2_ex0_6:48930550-48930572:+_5-4	1600015I10Rik	20.7002	20.5543	14.077	20.2573	0.992949	1.43903	1.0071	0.694913
ACGACTGGCCACCCATCCC	1600016N20Rik_CCDS40181.1_ex6_7:141211850-141211872:-_5-1	1600016N20Rik	4.30809	17.0702	14.5549	7.04663	3.96236	0.484142	0.252375	2.06551
TCCGAATAGAAATTCAAGT	1600016N20Rik_CCDS40181.1_ex7_7:141212401-141212423:+_5-3	1600016N20Rik	1	1	2.05922	1.77663	1	0.862767	1	1.15906
AAGGAGCCACTCTGTCGAC	1600016N20Rik_CCDS40181.1_ex12_7:141213934-141213956:+_5-5	1600016N20Rik	7.20993	21.371	14.3956	12.5068	2.9641	0.868794	0.33737	1.15102
GGTATACGTTTCGGAGGTC	1600016N20Rik_CCDS40181.1_ex6_7:141212021-141212043:+_5-2	1600016N20Rik	21.6675	11.2217	16.8565	16.5722	0.517905	0.983136	1.93086	1.01715
AGCTTAGCGCTCTGAGAAT	1600016N20Rik_CCDS40181.1_ex12_7:141213912-141213934:+_5-4	1600016N20Rik	7.55815	7.38198	3.67594	4.88315	0.976692	1.32841	1.02386	0.752779
ACTGACTGAATCGTTCACG	1600029D21Rik_CCDS40619.1_ex1_9:50499102-50499124:-_5-2	1600029D21Rik	17.5147	7.93522	11.4887	6.26207	0.453061	0.545063	2.20721	1.83465
TGTGCGATTGACGACGATG	1600029D21Rik_CCDS40619.1_ex2_9:50501076-50501098:-_5-5	1600029D21Rik	17.6888	16.517	32.8404	27.1281	0.933754	0.826057	1.07095	1.21057
TTGACATCCCAAAGCCAGT	1600029D21Rik_CCDS40619.1_ex1_9:50499219-50499241:+_5-4	1600029D21Rik	7.95151	9.73983	13.4319	11.2785	1.2249	0.839675	0.816392	1.19094
ATCCTGAAAGCAGTGAAGG	1600029D21Rik_CCDS40619.1_ex1_9:50499129-50499151:+_5-3	1600029D21Rik	6.91975	3.32491	5.42804	5.76281	0.480496	1.06167	2.08118	0.941908
AGTGATAATGGGTCCTGCG	1600029D21Rik_CCDS40619.1_ex0_9:50494643-50494665:+_5-1	1600029D21Rik	25.4077	33.8913	13.5116	22.7219	1.3339	1.68166	0.749682	0.594651
CCATAAGAAGAGCCAAAGG	1700001C02Rik_CCDS19158.1_ex1_5:30480414-30480436:-_5-2	1700001C02Rik	2.71531	5.51152	5.29265	3.02083	2.02979	0.570759	0.492661	1.75205
TGGTTGGATCGGCTGTAGG	1700001C02Rik_CCDS19158.1_ex1_5:30480594-30480616:-_5-5	1700001C02Rik	6.57153	17.7947	9.91978	9.1467	2.70785	0.922066	0.369297	1.08452
GGAAGCCACACCGGGAACA	1700001C02Rik_CCDS19158.1_ex1_5:30480394-30480416:-_5-1	1700001C02Rik	20.6422	7.81008	13.1851	16.279	0.378355	1.23466	2.64302	0.809942
GACTGATAACTCACAGAAC	1700001C02Rik_CCDS19158.1_ex1_5:30480552-30480574:+_5-4	1700001C02Rik	7.29376	5.34028	4.02636	5.45374	0.73217	1.35451	1.3658	0.738274
GCTATGCGCTCCTCAGTGG	1700001C02Rik_CCDS19158.1_ex1_5:30480488-30480510:+_5-3	1700001C02Rik	1	1	1	1.79248	1	1.79248	1	0.557886
AAATGCGAGCTACCTGGAC	1700001C19Rik_CCDS28849.1_ex2_17:47436606-47436628:-_5-3	1700001C19Rik	9.5443	4.72776	13.3921	7.43494	0.495349	0.555172	2.01878	1.80124
CACCTGTCGCCGGGTGCGC	1700001C19Rik_CCDS28849.1_ex2_17:47436654-47436676:+_5-5	1700001C19Rik	60.3458	46.8462	46.2918	38.5953	0.776296	0.833739	1.28817	1.19942
CGCATTTCCAGGCGAGCGG	1700001C19Rik_CCDS28849.1_ex2_17:47436620-47436642:+_5-4	1700001C19Rik	16.2508	22.2272	21.8022	21.6362	1.36776	0.992385	0.731122	1.00767
TCTGGGACAATGCCGTCAG	1700001C19Rik_CCDS28849.1_ex0_17:47413806-47413828:+_5-1	1700001C19Rik	18.6303	16.9517	15.2398	17.1428	0.909899	1.12487	1.09902	0.88899
GAAAGCATTCTCTGCACAG	1700001C19Rik_CCDS28849.1_ex1_17:47433338-47433360:+_5-2	1700001C19Rik	2.77334	1	3.85115	6.11942	0.360575	1.58899	2.77334	0.629331
CTAGCGTACGATGGGTACA	1700001J03Rik_CCDS51699.1_ex3_5:146184785-146184807:+_5-2	1700001J03Rik	6.61022	5.72227	8.16768	1.55474	0.865671	0.190352	1.15517	5.25342
CACTCACGTTGTCATCAGC	1700001J03Rik_CCDS51699.1_ex3_5:146184745-146184767:+_5-1	1700001J03Rik	18.5142	17.0966	15.3354	10.9456	0.92343	0.713751	1.08292	1.40105
TATAACAGCCCAGAATACG	1700001J03Rik_CCDS51699.1_ex3_5:146184877-146184899:-_5-4	1700001J03Rik	8.10628	6.44016	4.74312	5.08127	0.794466	1.07129	1.25871	0.933452
TAGTTGAATCGGGGGCGCC	1700001J03Rik_CCDS51699.1_ex3_5:146184896-146184918:+_5-5	1700001J03Rik	7.84833	17.6235	12.1975	13.8303	2.2455	1.13386	0.445335	0.881944
CATTATGCTGAACAGCAGC	1700001J03Rik_CCDS51699.1_ex3_5:146184834-146184856:+_5-3	1700001J03Rik	5.97826	6.74971	6.43151	7.39532	1.12904	1.14986	0.885706	0.869674
GCGATAGTTGGAATGACCT	1700001K19Rik_CCDS49175.1_ex1_12:110668895-110668917:+_5-5	1700001K19Rik	15.1481	16.9451	13.2249	9.86786	1.11863	0.746158	0.893951	1.3402
CATGGACTTCGAGGGCTGC	1700001K19Rik_CCDS49175.1_ex1_12:110668720-110668742:+_5-2	1700001K19Rik	20.7131	7.44784	13.5196	12.1027	0.359571	0.895196	2.78109	1.11707
GGGTGAACTAAAGACCAAC	1700001K19Rik_CCDS49175.1_ex1_12:110668680-110668702:-_5-1	1700001K19Rik	1	2.55433	3.67594	3.32197	2.55433	0.903707	0.391492	1.10655
GTGGAAGACTCGCTCCCAA	1700001K19Rik_CCDS49175.1_ex1_12:110668778-110668800:-_5-3	1700001K19Rik	1	1	1	1	1	1	1	1
GTTGCGGTTCCTATCACCC	1700001K19Rik_CCDS49175.1_ex1_12:110668844-110668866:+_5-4	1700001K19Rik	15.3996	12.9078	12.2931	13.5846	0.838191	1.10506	1.19305	0.904929
GGTCGGGGTTTGCCACGCA	1700001L19Rik_CCDS49306.1_ex0_13:68597615-68597637:-_5-1	1700001L19Rik	8.56412	13.1383	12.9382	8.80593	1.53411	0.680616	0.651845	1.46926
TTTCAGCTACATCCCACCA	1700001L19Rik_CCDS49306.1_ex0_13:68597660-68597682:+_5-2	1700001L19Rik	9.55719	8.84411	13.4718	13.4816	0.925388	1.00073	1.08063	0.999273
CTCATTAATATGGAGCCCC	1700001L19Rik_CCDS49306.1_ex1_13:68611253-68611275:-_5-5	1700001L19Rik	7.47432	8.67287	15.7495	16.1681	1.16036	1.02658	0.861805	0.974111
GCAGCTACTTCAGTCGCGA	1700001L19Rik_CCDS49306.1_ex0_13:68597701-68597723:+_5-3	1700001L19Rik	23.8858	22.1086	15.3115	18.8308	0.925596	1.22985	1.08038	0.813108
CTTAAAAACACAGTCATAG	1700001L19Rik_CCDS49306.1_ex1_13:68611175-68611197:-_5-4	1700001L19Rik	2.53475	1	2.25036	7.57759	0.394516	3.36727	2.53475	0.296976
GGCAGTAGCAGTGCGCGCG	1700001O22Rik_CCDS15885.1_ex6_2:30801312-30801334:+_5-3	1700001O22Rik	6.71339	13.2832	23.9923	12.6891	1.97861	0.528881	0.505406	1.89079
CGCGACAACCCTGACTCCC	1700001O22Rik_CCDS15885.1_ex6_2:30801227-30801249:-_5-2	1700001O22Rik	23.9181	11.2085	10.1985	9.51917	0.468622	0.933386	2.13391	1.07137
CGAACGCTCGGCGAGACCG	1700001O22Rik_CCDS15885.1_ex6_2:30801337-30801359:-_5-4	1700001O22Rik	9.52495	10.4972	19.7554	18.7595	1.10208	0.949586	0.907377	1.05309
CGGCCTCACGGTCCGCCTC	1700001O22Rik_CCDS15885.1_ex6_2:30801130-30801152:+_5-1	1700001O22Rik	16.2637	12.8287	15.2	23.4193	0.788797	1.54074	1.26775	0.649037
GCGAGATGTAGACGGCGCG	1700001O22Rik_CCDS15885.1_ex6_2:30801408-30801430:-_5-5	1700001O22Rik	10.6083	6.05817	8.7411	20.3682	0.571078	2.33017	1.75108	0.429154
TGATCAGTTTTCCGCAAAA	1700001P01Rik_CCDS36297.1_ex2_11:97775652-97775674:+_5-1	1700001P01Rik	6.28779	3.3315	7.27571	4.25709	0.529836	0.585111	1.88738	1.70908
CCGGAAGTACCGACGACTG	1700001P01Rik_CCDS36297.1_ex2_11:97775690-97775712:+_5-3	1700001P01Rik	2.53475	5.14928	3.76354	4.51069	2.03147	1.19852	0.492253	0.834361
GGGCGGAACCACGCGGCTC	1700001P01Rik_CCDS36297.1_ex2_11:97775672-97775694:+_5-2	1700001P01Rik	7.00358	6.57189	6.57487	8.05308	0.938361	1.22483	1.06569	0.816441
CCGCCTTATAATCCTCAAC	1700001P01Rik_CCDS36297.1_ex2_11:97775717-97775739:-_5-4	1700001P01Rik	8.39001	8.56749	9.57733	13.854	1.02115	1.44654	0.979285	0.691303
GGAATTGCAGACCACAGCT	1700001P01Rik_CCDS36297.1_ex2_11:97775736-97775758:+_5-5	1700001P01Rik	3.36016	2.0472	2.20258	6.29377	0.609256	2.85746	1.64135	0.349962
CCTCTACACAAACGGGCGC	1700003E16Rik_CCDS51818.1_ex2_6:83161399-83161421:-_5-3	1700003E16Rik	12.9491	13.5861	23.1163	15.9145	1.04919	0.688453	0.953113	1.45253
AATCCGTAGTGCATGCCAG	1700003E16Rik_CCDS51818.1_ex2_6:83161342-83161364:-_5-2	1700003E16Rik	14.1356	13.6783	24.9401	20.3682	0.967649	0.816687	1.03343	1.22446
CGCAGGTGGACATCGTGCC	1700003E16Rik_CCDS51818.1_ex1_6:83160981-83161003:+_5-1	1700003E16Rik	18.2176	25.4939	19.5006	16.3583	1.39941	0.83886	0.714585	1.19209
CTTTACGATCTACGGCGGA	1700003E16Rik_CCDS51818.1_ex3_6:83161770-83161792:+_5-4	1700003E16Rik	14.2195	16.5565	17.4379	21.9294	1.16435	1.25757	0.858846	0.795183
GTCCCCTGCCGCGTCTGGC	1700003E16Rik_CCDS51818.1_ex3_6:83161916-83161938:-_5-5	1700003E16Rik	43.0186	59.4587	39.3949	64.6679	1.38216	1.64153	0.723504	0.609188
GCGGGGGTTCTCACCCACA	1700003F12Rik_CCDS16933.1_ex1_2:154549359-154549381:-_5-2	1700003F12Rik	7.93217	7.34905	2.79192	1.72116	0.926487	0.616478	1.07935	1.62212
GCCGCACCGGCCTCACAAA	1700003F12Rik_CCDS16933.1_ex2_2:154549603-154549625:-_5-4	1700003F12Rik	7.60329	4.63556	11.3215	7.06248	0.609678	0.623813	1.64021	1.60304
GGTCCTCAGTTGGCCGCAC	1700003F12Rik_CCDS16933.1_ex2_2:154549615-154549637:-_5-5	1700003F12Rik	11.3047	24.4731	19.5165	15.7956	2.16485	0.809346	0.461926	1.23557
GTTCTTCAGCCATCTCAAG	1700003F12Rik_CCDS16933.1_ex0_2:154549033-154549055:+_5-1	1700003F12Rik	8.36422	4.43797	11.2737	9.9471	0.53059	0.88233	1.88469	1.13336
ATCGTGCTGCTTTTCCCGC	1700003F12Rik_CCDS16933.1_ex2_2:154549545-154549567:+_5-3	1700003F12Rik	20.8615	15.8452	31.0485	27.5481	0.759544	0.887259	1.31658	1.12707
ATATGAACTATACAAGTCG	1700003M02Rik_CCDS18031.2_ex7_4:34724814-34724836:-_5-5	1700003M02Rik	1.0129	4.51701	1.39024	1	4.45949	0.7193	0.224241	1.39024
TCGCTTCGTGGAGAATGGC	1700003M02Rik_CCDS18031.2_ex4_4:34719757-34719779:+_5-2	1700003M02Rik	9.84738	11.7354	15.415	16.0968	1.19173	1.04423	0.839115	0.957647
TCACCGGGTCTTAGAATCC	1700003M02Rik_CCDS18031.2_ex6_4:34722756-34722778:-_5-4	1700003M02Rik	11.4466	9.19317	9.14727	12.1344	0.803135	1.32655	1.24512	0.753832
GGCCGTGTAGCGAAACGCC	1700003M02Rik_CCDS18031.2_ex4_4:34719686-34719708:+_5-1	1700003M02Rik	10.144	9.10097	9.91978	14.2582	0.897177	1.43735	1.11461	0.695725
CGAATTCCGGTAACAATCA	1700003M02Rik_CCDS18031.2_ex5_4:34721462-34721484:+_5-3	1700003M02Rik	2.69596	11.1097	4.91037	8.55234	4.12088	1.74169	0.242666	0.574155
ATCCCGAGTTGCAGGAACG	1700006A11Rik_CCDS51064.1_ex6_3:124414334-124414356:+_5-1	1700006A11Rik	4.46286	7.09219	5.38025	4.64541	1.58916	0.863419	0.629264	1.15819
GGCAGACATAGGATACATG	1700006A11Rik_CCDS51064.1_ex6_3:124414354-124414376:+_5-2	1700006A11Rik	6.12658	2.04061	6.92529	6.0798	0.333075	0.877913	3.00232	1.13906
ATGCCACGCCCTAAAAGAA	1700006A11Rik_CCDS51064.1_ex8_3:124419290-124419312:-_5-3	1700006A11Rik	9.47981	8.71239	7.99247	7.64891	0.919046	0.957014	1.08808	1.04492
CCCTGCCAGTTACTAAGAG	1700006A11Rik_CCDS51064.1_ex9_3:124419820-124419842:-_5-4	1700006A11Rik	11.7303	11.7552	13.9337	13.4499	1.00212	0.965277	0.997887	1.03597
ATAACTCAAGTATTCCACA	1700006A11Rik_CCDS51064.1_ex9_3:124419875-124419897:-_5-5	1700006A11Rik	1	1	1	2.0223	1	2.0223	1	0.494487
GAATGAGTATCTTTCAAAA	1700006E09Rik_CCDS48938.1_ex2_11:101988543-101988565:+_5-5	1700006E09Rik	2.82493	1	1.88401	1	0.353991	0.530782	2.82493	1.88401
GATTCTCTTTTGTTCACCC	1700006E09Rik_CCDS48938.1_ex2_11:101988442-101988464:-_5-3	1700006E09Rik	17.4179	7.96815	10.4056	7.04663	0.457468	0.677196	2.18595	1.47668
TCATTCCAGCAGTCCACCT	1700006E09Rik_CCDS48938.1_ex2_11:101988528-101988550:-_5-4	1700006E09Rik	8.93814	4.81338	13.3921	10.5415	0.538522	0.787139	1.85693	1.27042
ACAAAAATAGAGTACAAAT	1700006E09Rik_CCDS48938.1_ex0_11:101987216-101987238:+_5-1	1700006E09Rik	1	1	1	1	1	1	1	1
GAGGTTTGGTATCGACGGC	1700006E09Rik_CCDS48938.1_ex1_11:101987952-101987974:-_5-2	1700006E09Rik	15.967	6.98023	12.747	13.5133	0.437165	1.06011	2.28747	0.943298
TAATGTAGTTCAAGAACAT	1700007B14Rik_CCDS52603.1_ex2_8:75577830-75577852:+_5-1	1700007B14Rik	1	2.17234	3.61222	2.26797	2.17234	0.62786	0.460334	1.59271
AAGAGGCCAGATTATGCAA	1700007B14Rik_CCDS52603.1_ex4_8:75629748-75629770:-_5-4	1700007B14Rik	3.47623	7.51371	9.20302	6.87228	2.16145	0.746742	0.462652	1.33915
GCAGATCCATGAGGCAAAT	1700007B14Rik_CCDS52603.1_ex5_8:75669432-75669454:-_5-5	1700007B14Rik	6.53284	7.14488	9.73661	8.75838	1.09369	0.899531	0.914338	1.11169
TCAATTAAAGCTGTGCACT	1700007B14Rik_CCDS52603.1_ex2_8:75577890-75577912:-_5-2	1700007B14Rik	7.55815	7.83643	5.89792	7.23682	1.03682	1.22701	0.964489	0.814987
CTTTTATATTCGACACATG	1700007B14Rik_CCDS52603.1_ex2_8:75577940-75577962:-_5-3	1700007B14Rik	4.03081	8.68604	4.33696	7.97383	2.15491	1.83858	0.464056	0.543899
ACGGTCGACCTGTACTACC	1700007G11Rik_CCDS19456.1_ex0_5:98329440-98329462:+_5-1	1700007G11Rik	12.2527	9.81227	8.8526	6.72963	0.800827	0.760188	1.24871	1.31546
CGGACCCGCGCTTACCTCC	1700007G11Rik_CCDS19456.1_ex0_5:98329458-98329480:-_5-2	1700007G11Rik	6.06209	8.96925	10.4375	14.2661	1.47956	1.36682	0.675875	0.731625
CTGAAAGCCCTGGCGATGA	1700007G11Rik_CCDS19456.1_ex2_5:98498328-98498350:+_5-5	1700007G11Rik	20.7518	9.7991	17.5414	25.8601	0.472204	1.47423	2.11773	0.67832
TAGGACACTGACAAGCGCG	1700007G11Rik_CCDS19456.1_ex2_5:98498285-98498307:+_5-4	1700007G11Rik	9.90541	10.8726	8.77296	13.0853	1.09765	1.49155	0.91104	0.670442
TGGTGGAGCTAGGCTACCG	1700007G11Rik_CCDS19456.1_ex1_5:98346253-98346275:+_5-3	1700007G11Rik	3.91473	5.07683	3.49276	6.87228	1.29685	1.96758	0.771098	0.508239
CTTTACTCCAAAATATCCA	1700007K09Rik_CCDS21912.1_ex1_7:131327208-131327230:-_5-5	1700007K09Rik	1	1.98792	3.42905	1.45964	1.98792	0.425669	0.503038	2.34924
ATTGTTCATTCTTACCCAG	1700007K09Rik_CCDS21912.1_ex1_7:131327176-131327198:+_5-3	1700007K09Rik	18.9011	12.8946	19.628	17.6976	0.682214	0.901648	1.46582	1.10908
TTCTTAAGAATCGCAAAGG	1700007K09Rik_CCDS21912.1_ex0_7:131326311-131326333:-_5-2	1700007K09Rik	8.11272	13.7903	16.7928	15.2329	1.69984	0.907112	0.588292	1.1024
CAAGGCTCTGAAGTCCCCT	1700007K09Rik_CCDS21912.1_ex1_7:131327191-131327213:-_5-4	1700007K09Rik	25.7043	22.2272	13.0417	14.7812	0.864726	1.13338	1.15644	0.882315
TCTCATGGGGGTCCTTGCA	1700007K09Rik_CCDS21912.1_ex0_7:131326265-131326287:+_5-1	1700007K09Rik	14.5097	18.1833	25.2507	34.5774	1.25318	1.36937	0.797968	0.730265
AGTCAGGTTCAACAACCCG	1700007K13Rik_CCDS15837.1_ex2_2:28466051-28466073:-_5-3	1700007K13Rik	13.7487	19.7705	16.9919	8.77423	1.43799	0.516377	0.695415	1.93657
CTAATGCGGTAGTAGTCGC	1700007K13Rik_CCDS15837.1_ex2_2:28466084-28466106:+_5-5	1700007K13Rik	12.3043	12.9473	12.4763	10.6366	1.05226	0.852544	0.950336	1.17296
GGCATCTCATGCACCGTGG	1700007K13Rik_CCDS15837.1_ex1_2:28465137-28465159:+_5-1	1700007K13Rik	16.4507	7.44126	19.0626	17.864	0.452338	0.937124	2.21074	1.06709
TAGCGAGAAGCTCCCAGTC	1700007K13Rik_CCDS15837.1_ex2_2:28466066-28466088:-_5-4	1700007K13Rik	9.91186	11.1427	7.43499	8.48894	1.12418	1.14176	0.889541	0.875844
GGTTTCATGGCTACGGGTA	1700007K13Rik_CCDS15837.1_ex2_2:28466028-28466050:-_5-2	1700007K13Rik	6.94554	11.8869	9.45787	17.2538	1.71144	1.82428	0.584302	0.548162
AGAGCCATTAAGGACCCTC	1700008A04Rik_CCDS48767.1_ex0_11:32820638-32820660:-_5-1	1700008A04Rik	11.0404	3.12074	8.74906	4.58994	0.282667	0.52462	3.53773	1.90614
GAAGTGTCAGGACAGACCA	1700008A04Rik_CCDS48767.1_ex1_11:32821887-32821909:-_5-3	1700008A04Rik	17.0246	20.4094	12.2373	11.3181	1.19882	0.924882	0.834155	1.08122
TGAAAGTGGTTGCAGTCCT	1700008A04Rik_CCDS48767.1_ex1_11:32821870-32821892:+_5-2	1700008A04Rik	14.658	14.4687	23.2517	21.866	0.987086	0.940406	1.01308	1.06337
ACCTGATATCCCCATACCC	1700008A04Rik_CCDS48767.1_ex2_11:32822095-32822117:+_5-4	1700008A04Rik	7.49367	12.3018	7.87301	8.44139	1.64163	1.07219	0.60915	0.932668
AAGTCACCACTGTGATGAC	1700008A04Rik_CCDS48767.1_ex3_11:32824431-32824453:-_5-5	1700008A04Rik	4.17267	1	2.19461	5.01788	0.239654	2.28645	4.17267	0.437359
GCTAGAAGGTGAAATACAA	1700008F21Rik_CCDS52713.1_ex8_8:129145571-129145593:+_7-4	1700008F21Rik	1	1	3.41312	1	1	0.292987	1	3.41312
AATCTTTCATCATAGTCGA	1700008F21Rik_CCDS52713.1_ex0_8:129072645-129072667:-_7-2	1700008F21Rik	5.99761	3.46981	13.4718	5.27939	0.578532	0.391886	1.72851	2.55176
TAGAGCGAACTAAGAAACC	1700008F21Rik_CCDS52713.1_ex9_8:129163852-129163874:+_7-6	1700008F21Rik	1.0129	3.06147	5.06965	2.15702	3.02248	0.425477	0.330854	2.3503
ATTTTATCAGGTGTCGACT	1700008F21Rik_CCDS52713.1_ex0_8:129072559-129072581:-_7-1	1700008F21Rik	16.0638	15.8123	19.4369	12.0789	0.984344	0.621441	1.01591	1.60916
CATCTCTGACTTTTGAGGT	1700008F21Rik_CCDS52713.1_ex11_8:129178236-129178258:-_7-7	1700008F21Rik	20.107	16.326	11.4887	8.76631	0.811956	0.763037	1.23159	1.31055
GGCTGAGAGATCCCGAGGT	1700008F21Rik_CCDS52713.1_ex8_8:129145591-129145613:+_7-5	1700008F21Rik	9.08645	15.2656	4.42456	4.02728	1.68004	0.910209	0.595224	1.09865
TGAAGAAAAACCTGCTAGA	1700008F21Rik_CCDS52713.1_ex8_8:129145558-129145580:+_7-3	1700008F21Rik	1	1	7.6978	10.0026	1	1.29941	1	0.769582
TTCTTAGAAGATTCTGACG	1700008I05Rik_CCDS41129.1_ex5_X:135664560-135664582:+_5-4	1700008I05Rik	1	3.50274	3.1742	2.01438	3.50274	0.634609	0.285491	1.57577
GTACATTGTCTCCACGAAT	1700008I05Rik_CCDS41129.1_ex6_X:135665495-135665517:+_5-5	1700008I05Rik	4.43706	12.5389	9.15523	7.0704	2.82595	0.77228	0.353863	1.29487
TCTAATTGGTGCGCACATG	1700008I05Rik_CCDS41129.1_ex5_X:135664435-135664457:+_5-3	1700008I05Rik	374.067	458.382	414.544	427.458	1.2254	1.03115	0.816059	0.969789
ACTTGATTGCACCACAAAA	1700008I05Rik_CCDS41129.1_ex3_X:135659193-135659215:-_5-1	1700008I05Rik	5.55911	3.54226	7.4111	11.017	0.637198	1.48655	1.56937	0.672699
TTTCATCAGGCCTAAAACT	1700008I05Rik_CCDS41129.1_ex4_X:135660549-135660571:+_5-2	1700008I05Rik	2.32195	4.91876	1.05575	2.66421	2.11838	2.52353	0.472059	0.396271
TTCCGAGATGACCTGCCGC	1700008O03Rik_CCDS52230.1_ex2_7:44362741-44362763:+_5-4	1700008O03Rik	20.1199	21.1339	20.9341	18.5455	1.0504	0.885899	0.952021	1.1288
ATGTCATCTGCGGTACTGC	1700008O03Rik_CCDS52230.1_ex1_7:44361062-44361084:-_5-1	1700008O03Rik	23.7633	25.9549	27.839	24.8933	1.09223	0.894188	0.91556	1.11833
GACATTCATATTCTCGTAG	1700008O03Rik_CCDS52230.1_ex1_7:44361078-44361100:+_5-2	1700008O03Rik	3.1667	7.60591	6.67043	7.59344	2.40184	1.13837	0.416348	0.878447
GGGAGTACTCACGAGGACT	1700008O03Rik_CCDS52230.1_ex3_7:44362930-44362952:+_5-5	1700008O03Rik	3.14091	8.7058	8.69331	11.7936	2.77174	1.35663	0.360784	0.737122
CACCGAAGTCTCCATGCAA	1700008O03Rik_CCDS52230.1_ex2_7:44362648-44362670:+_5-3	1700008O03Rik	12.0012	9.61469	4.67145	11.54	0.801145	2.47032	1.24821	0.404805
CTACGGAACTGGTTGATGG	1700008P02Rik_CCDS50858.1_ex2_3:6620049-6620071:+_5-2	1700008P02Rik	16.4313	13.4017	17.5016	10.3354	0.815621	0.590541	1.22606	1.69336
TGGTGACAAGCCTGAACGT	1700008P02Rik_CCDS50858.1_ex2_3:6620261-6620283:+_5-5	1700008P02Rik	22.48	19.2305	32.9838	36.0831	0.855446	1.09396	1.16898	0.914106
AATGGGCGGGAGGTTCGAA	1700008P02Rik_CCDS50858.1_ex2_3:6620109-6620131:+_5-3	1700008P02Rik	15.2835	7.50053	8.30307	9.46369	0.490761	1.13978	2.03765	0.877361
AAGGAAAGTTTAGTAAGGC	1700008P02Rik_CCDS50858.1_ex2_3:6620144-6620166:+_5-4	1700008P02Rik	4.12754	1	1.30264	2.25212	0.242275	1.72889	4.12754	0.578404
GTGGCTAGTTTTCTGATCA	1700008P02Rik_CCDS50858.1_ex2_3:6620020-6620042:+_5-1	1700008P02Rik	11.0726	5.36003	6.08109	13.2359	0.484081	2.17657	2.06577	0.459439
TTCAAATTCACCAGTCAAG	1700009N14Rik_CCDS38709.1_ex0_4:39450882-39450904:-_5-1	1700009N14Rik	13.0458	18.6706	10.5649	6.21452	1.43116	0.588225	0.698736	1.70003
GCTATTACATCCAAGCCCA	1700009N14Rik_CCDS38709.1_ex0_4:39451027-39451049:+_5-3	1700009N14Rik	9.96345	12.8748	20.6554	12.2691	1.29221	0.593989	0.77387	1.68353
ACCAGATCCCTATGCCAGT	1700009N14Rik_CCDS38709.1_ex0_4:39451100-39451122:-_5-4	1700009N14Rik	29.7346	28.5367	32.8643	35.0133	0.959713	1.06539	1.04198	0.938625
GCCCATCAAGTTTAACGTC	1700009N14Rik_CCDS38709.1_ex0_4:39450965-39450987:+_5-2	1700009N14Rik	10.3633	1.01317	6.23241	10.3592	0.0977658	1.66215	10.2285	0.601631
TGAAATGTCGTAATACTGA	1700009N14Rik_CCDS38709.1_ex0_4:39451224-39451246:-_5-5	1700009N14Rik	1	1	1.00796	2.37099	1	2.35226	1	0.425123
GATCATCGCCAACGATCGA	1700009P17Rik_CCDS35771.1_ex2_1:171125298-171125320:+_5-1	1700009P17Rik	15.7542	4.68825	14.2045	12.6336	0.297587	0.889411	3.36037	1.12434
CCTTGGAACGGGGCACTGA	1700009P17Rik_CCDS35771.1_ex2_1:171125330-171125352:-_5-2	1700009P17Rik	15.4769	7.40174	16.0999	17.5945	0.478243	1.09283	2.09099	0.915052
GTAGTTGTACGGGCGGTCA	1700009P17Rik_CCDS35771.1_ex3_1:171126101-171126123:-_5-4	1700009P17Rik	29.5154	39.4434	24.2472	30.7259	1.33637	1.2672	0.748298	0.789144
TGCCCATGAAGGAACCCCA	1700009P17Rik_CCDS35771.1_ex3_1:171126040-171126062:-_5-3	1700009P17Rik	3.54072	1.00659	1.74066	3.11592	0.284289	1.79008	3.51755	0.558634
TGCCGACAACCTCACCAAA	1700009P17Rik_CCDS35771.1_ex3_1:171126125-171126147:+_5-5	1700009P17Rik	6.86171	12.3414	8.28715	16.6832	1.79858	2.01314	0.555993	0.496736
CACAATATAGAAATACCGC	1700010B08Rik_CCDS50816.1_ex2_2:173721776-173721798:+_5-1	1700010B08Rik	2.63148	6.71678	7.2996	2.0223	2.55248	0.277043	0.391777	3.60955
TGTCTCCACAGGCTTCTCC	1700010B08Rik_CCDS50816.1_ex2_2:173721863-173721885:+_5-5	1700010B08Rik	29.3929	21.338	31.598	25.8126	0.72596	0.816904	1.37749	1.22413
GAGTTTCGGATTGAGAGTC	1700010B08Rik_CCDS50816.1_ex2_2:173721836-173721858:-_5-4	1700010B08Rik	13.9486	4.46432	10.7958	8.9248	0.320054	0.82669	3.12447	1.20964
CAGGAGAAAGAGGAAACCA	1700010B08Rik_CCDS50816.1_ex2_2:173721794-173721816:+_5-2	1700010B08Rik	1	1	1	1	1	1	1	1
GAGCAGCGTTCTCTTTCCA	1700010B08Rik_CCDS50816.1_ex2_2:173721811-173721833:-_5-3	1700010B08Rik	15.6059	19.7837	8.86056	11.1358	1.26771	1.25679	0.788826	0.795681
CTTCTTGCTACATTTGGAC	1700010D01Rik_CCDS53138.1_ex1_X:95732996-95733018:+_5-1	1700010D01Rik	29.4058	14.3699	22.9968	20.8913	0.488676	0.908441	2.04635	1.10079
GCTCAGCAGTCGAGGTTGA	1700010D01Rik_CCDS53138.1_ex1_X:95733049-95733071:+_5-2	1700010D01Rik	24.4791	22.675	25.3542	24.6001	0.926302	0.970256	1.07956	1.03066
AGGTTGATGGCACAGCATC	1700010D01Rik_CCDS53138.1_ex1_X:95733121-95733143:+_5-5	1700010D01Rik	13.5424	15.3117	16.0442	17.3489	1.13065	1.08132	0.884446	0.924796
GTCTTGGGTTCGGAAGTCC	1700010D01Rik_CCDS53138.1_ex1_X:95733102-95733124:+_5-4	1700010D01Rik	12.5235	17.4522	15.2876	16.8972	1.39356	1.10529	0.717589	0.904743
TGGCTCAACATCAGGTGTG	1700010D01Rik_CCDS53138.1_ex1_X:95733068-95733090:+_5-3	1700010D01Rik	24.5952	31.0263	19.9068	33.0004	1.26148	1.65775	0.79272	0.603228
CGTTATACCAGCTAGGTAG	1700010I14Rik_CCDS28385.2_ex1_17:8992608-8992630:-_5-4	1700010I14Rik	24.8467	6.86168	19.7315	15.2963	0.276161	0.775223	3.62108	1.28995
TATGACTTCACGGGGAGCA	1700010I14Rik_CCDS28385.2_ex1_17:8992698-8992720:+_5-5	1700010I14Rik	14.8901	12.4401	15.9008	14.0284	0.835463	0.882243	1.19694	1.13348
CACGGGAGGCCTGTACGCG	1700010I14Rik_CCDS28385.2_ex1_17:8992390-8992412:-_5-2	1700010I14Rik	8.51898	10.9187	20.9739	19.7739	1.2817	0.942782	0.780216	1.06069
GCACTGGCGCAATTCCAAC	1700010I14Rik_CCDS28385.2_ex1_17:8992211-8992233:+_5-1	1700010I14Rik	22.0738	7.57298	8.319	8.37007	0.343076	1.00614	2.91481	0.993899
CGGTACACATCCCTGCCTG	1700010I14Rik_CCDS28385.2_ex1_17:8992577-8992599:-_5-3	1700010I14Rik	25.7108	36.9999	25.9196	30.3218	1.43908	1.16984	0.694887	0.85482
GGCTTTTCTGTAGTTCACA	1700011A15Rik_CCDS37217.1_ex2_15:101452379-101452401:-_5-1	1700011A15Rik	14.5806	3.92425	11.7037	10.2958	0.269142	0.879701	3.71551	1.13675
CCATGCCGGATGCGGCCTC	1700011A15Rik_CCDS37217.1_ex2_15:101452412-101452434:+_5-2	1700011A15Rik	21.8481	34.6487	30.1167	28.6496	1.58589	0.951287	0.630561	1.05121
CGGCAGCTACGTGAGTACC	1700011A15Rik_CCDS37217.1_ex2_15:101452498-101452520:+_5-4	1700011A15Rik	20.107	13.8562	20.8943	21.7392	0.689122	1.04044	1.45112	0.961134
AGCTCATGATCGTCAAACT	1700011A15Rik_CCDS37217.1_ex2_15:101452520-101452542:+_5-5	1700011A15Rik	3.47623	11.4193	7.06068	10.6683	3.28496	1.51094	0.304418	0.661839
CGGCCTCAGGCAGCGCTAA	1700011A15Rik_CCDS37217.1_ex2_15:101452424-101452446:+_5-3	1700011A15Rik	4.48865	2.25796	4.106	10.1769	0.503036	2.47855	1.98793	0.403461
CTTTGCCCGGGACAGTACG	1700011E24Rik_CCDS50206.1_ex3_17:87411562-87411584:-_5-2	1700011E24Rik	27.9871	28.8265	27.1382	19.3776	1.02999	0.714036	0.97088	1.40049
GCAGCTCCAAGAAGTCAGG	1700011E24Rik_CCDS50206.1_ex4_17:87422590-87422612:+_5-3	1700011E24Rik	6.62956	5.27441	6.88547	7.14172	0.79559	1.03722	1.25693	0.964118
CACAGGATACTCCGATACC	1700011E24Rik_CCDS50206.1_ex4_17:87422755-87422777:-_5-5	1700011E24Rik	14.1356	24.2886	13.209	13.751	1.71825	1.04104	0.581986	0.960581
TACGAGGTACTTCCAGCAC	1700011E24Rik_CCDS50206.1_ex3_17:87411547-87411569:-_5-1	1700011E24Rik	17.1987	14.3172	8.65349	13.2755	0.832458	1.53412	1.20126	0.651838
CTTGTGCTGAGAAACGATC	1700011E24Rik_CCDS50206.1_ex4_17:87422639-87422661:-_5-4	1700011E24Rik	3.25054	4.30625	2.20258	6.34132	1.32478	2.87904	0.754842	0.347338
CCAATCTTTCCAGTATCCA	1700011H14Rik_CCDS26996.1_ex4_14:49243803-49243825:-_5-2	1700011H14Rik	7.28731	6.83533	12.0462	8.60781	0.937977	0.714567	1.06612	1.39945
AGAGGTAATTGCTTGTGGC	1700011H14Rik_CCDS26996.1_ex3_14:49235927-49235949:+_5-1	1700011H14Rik	1.76093	1	8.15972	6.1432	0.567883	0.752869	1.76093	1.32825
ACCAGAATCGAACTCGAGA	1700011H14Rik_CCDS26996.1_ex5_14:49245088-49245110:-_5-4	1700011H14Rik	8.84786	18.7497	12.1816	10.4384	2.11912	0.856903	0.471894	1.16699
AGCTCATTCACGAGACTGC	1700011H14Rik_CCDS26996.1_ex5_14:49245110-49245132:-_5-5	1700011H14Rik	8.90589	4.28649	11.7356	11.4449	0.481309	0.975229	2.07767	1.0254
TTGGTTTTGCCATACCTGC	1700011H14Rik_CCDS26996.1_ex5_14:49245025-49245047:+_5-3	1700011H14Rik	6.38452	12.8419	12.6754	18.2127	2.01141	1.43686	0.497163	0.695964
ATGTTAAGTTTCTCCTGGG	1700011I03Rik_CCDS50295.1_ex4_18:57594110-57594132:-_5-5	1700011I03Rik	12.4461	7.94181	19.8032	15.3756	0.638094	0.776419	1.56717	1.28796
ATGTGAACCGAAAGAACGT	1700011I03Rik_CCDS50295.1_ex3_18:57592037-57592059:+_5-3	1700011I03Rik	5.30762	2.14599	5.68289	6.19075	0.404323	1.08937	2.47327	0.917965
TAACTTCCAAGCATCGACC	1700011I03Rik_CCDS50295.1_ex1_18:57538029-57538051:-_5-1	1700011I03Rik	4.48865	9.5159	8.49421	10.9615	2.11999	1.29046	0.4717	0.774915
CACTTGGAGATTTGCCTGA	1700011I03Rik_CCDS50295.1_ex2_18:57563985-57564007:+_5-2	1700011I03Rik	21.4483	15.8715	15.5584	22.08	0.739991	1.41917	1.35137	0.704637
TTGCAACTTCTCAATGCAC	1700011I03Rik_CCDS50295.1_ex4_18:57594075-57594097:-_5-4	1700011I03Rik	7.84189	11.2481	7.43499	12.483	1.43436	1.67896	0.697177	0.595607
TAACTTACAGGGGGACATA	1700011L22Rik_CCDS52605.1_ex2_8:79214884-79214906:+_5-1	1700011L22Rik	2.62503	4.49725	4.26528	1.84795	1.71322	0.433255	0.583697	2.30811
ACGCAAGGCCCAACAACTG	1700011L22Rik_CCDS52605.1_ex5_8:79248351-79248373:-_5-4	1700011L22Rik	4.2694	10.0889	10.2622	7.20512	2.36307	0.7021	0.423179	1.4243
ACACTCTACCCGGCCACGC	1700011L22Rik_CCDS52605.1_ex4_8:79229343-79229365:-_5-3	1700011L22Rik	16.7666	26.2645	26.294	21.0339	1.56647	0.799952	0.638377	1.25007
TTCGAACTGATCAGACGCA	1700011L22Rik_CCDS52605.1_ex5_8:79248365-79248387:-_5-5	1700011L22Rik	14.1743	16.5038	12.6116	12.6098	1.16434	0.999857	0.858853	1.00014
GATATAGCAAGCCCCTCCA	1700011L22Rik_CCDS52605.1_ex3_8:79220273-79220295:-_5-2	1700011L22Rik	5.97826	8.82435	5.21301	14.1235	1.47607	2.70928	0.677473	0.369102
CTGCAGCCACTTCTGCAGC	1700012A03Rik_CCDS19984.1_ex1_6:32058578-32058600:-_5-5	1700012A03Rik	8.90589	9.97034	17.3105	17.9195	1.11952	1.03518	0.893239	0.966015
TCTCCTCTAGTTCAAGATC	1700012A03Rik_CCDS19984.1_ex1_6:32058472-32058494:+_5-2	1700012A03Rik	12.459	15.5686	15.1761	15.9779	1.24958	1.05283	0.800268	0.949818
CTGCGCCCTCTTCTGCAGC	1700012A03Rik_CCDS19984.1_ex1_6:32058549-32058571:-_5-4	1700012A03Rik	26.3298	26.225	22.7977	31.0746	0.996018	1.36306	1.004	0.733644
TGGAGTCACTCTAGAGGAG	1700012A03Rik_CCDS19984.1_ex1_6:32058491-32058513:+_5-3	1700012A03Rik	4.14043	13.8957	9.09948	13.125	3.3561	1.44238	0.297965	0.693297
GAAACAGGAAGTACCTCAG	1700012A03Rik_CCDS19984.1_ex0_6:32051723-32051745:-_5-1	1700012A03Rik	2.52185	1	2.05126	3.02083	0.396534	1.47267	2.52185	0.67904
AAGATGAGTCCTCACAGAA	1700012B07Rik_CCDS48972.1_ex2_11:109797277-109797299:-_5-3	1700012B07Rik	4.35323	4.50383	3.26977	1	1.03459	0.305832	0.966562	3.26977
ACAGCAAAGTCGTTGGACA	1700012B07Rik_CCDS48972.1_ex2_11:109797381-109797403:-_5-4	1700012B07Rik	4.52734	5.14928	8.58182	5.43789	1.13737	0.633653	0.879219	1.57815
GGTCCTTTGCAGGCACGTA	1700012B07Rik_CCDS48972.1_ex1_11:109794270-109794292:-_5-2	1700012B07Rik	139.605	111.252	132.097	137.188	0.796909	1.03854	1.25485	0.962892
CACCACTCATCCCACGGTC	1700012B07Rik_CCDS48972.1_ex3_11:109813670-109813692:-_5-5	1700012B07Rik	21.6869	2.92316	15.7893	23.3242	0.134789	1.47721	7.41899	0.676951
TGTCCATAAGGTGCCGGAA	1700012B07Rik_CCDS48972.1_ex1_11:109794227-109794249:+_5-1	1700012B07Rik	18.2305	24.2359	18.4175	29.4025	1.32942	1.59645	0.752207	0.626391
GAACCGCATAAGAGAATCA	1700012B09Rik_CCDS40536.1_ex2_9:14766920-14766942:-_5-3	1700012B09Rik	3.86959	1	3.76354	1	0.258425	0.265707	3.86959	3.76354
AATGCTCCAGATTCCATCC	1700012B09Rik_CCDS40536.1_ex1_9:14761704-14761726:+_5-1	1700012B09Rik	14.2001	13.5598	7.53852	5.216	0.954906	0.691912	1.04722	1.44527
TTGTTGGCGAGACTCTTGG	1700012B09Rik_CCDS40536.1_ex3_9:14770839-14770861:+_5-4	1700012B09Rik	27.052	17.9396	19.5086	16.7387	0.663151	0.858017	1.50795	1.16548
ATGTGAAAAGCCCACCTAC	1700012B09Rik_CCDS40536.1_ex2_9:14766856-14766878:-_5-2	1700012B09Rik	2.65727	11.3271	8.07212	7.57759	4.26268	0.938736	0.234594	1.06526
GCACCCGTGCTGAGCCTGG	1700012B09Rik_CCDS40536.1_ex3_9:14770862-14770884:-_5-5	1700012B09Rik	17.1149	22.1086	16.0521	15.328	1.29178	0.954891	0.774126	1.04724
GTTACGCGCTTCCTGCCAG	1700012L04Rik_CCDS40856.1_ex0_X:9284061-9284083:-_1-1	1700012L04Rik	13.7616	10.5499	16.1238	11.1596	0.766618	0.692119	1.30443	1.44484
TGATCAGATAGCGATGCGA	1700012P22Rik_CCDS51365.1_ex1_4:144419789-144419811:+_5-2	1700012P22Rik	15.4769	9.27221	19.0148	10.6366	0.599098	0.559384	1.66918	1.78768
TATTCGAAAAGTAAAATGG	1700012P22Rik_CCDS51365.1_ex2_4:144423778-144423800:-_5-4	1700012P22Rik	4.16623	1	1.74066	1.00792	0.240025	0.579047	4.16623	1.72697
CTATGATGACCACTACAAC	1700012P22Rik_CCDS51365.1_ex1_4:144419764-144419786:-_5-1	1700012P22Rik	3.631	11.6169	10.3021	9.67766	3.19936	0.939391	0.312562	1.06452
TCCTTCCTGTAAATGCACT	1700012P22Rik_CCDS51365.1_ex2_4:144423845-144423867:+_5-5	1700012P22Rik	5.57845	6.01206	6.01738	6.29377	1.07773	1.04593	0.927877	0.956085
GTGCTTGTACGGGAGACCC	1700012P22Rik_CCDS51365.1_ex1_4:144419832-144419854:+_5-3	1700012P22Rik	12.3688	10.5565	10.3897	11.0011	0.853482	1.05885	1.17167	0.94442
AACATTGCGCAGAGAACAT	1700013D24Rik_CCDS51906.1_ex1_6:124356458-124356480:+_5-2	1700013D24Rik	4.84977	3.32491	1.83623	1	0.685581	0.544594	1.45862	1.83623
AGGCGAGAACATGACAAAA	1700013D24Rik_CCDS51906.1_ex2_6:124356911-124356933:+_5-5	1700013D24Rik	5.24958	1.92206	5.81031	3.53594	0.366136	0.608562	2.73122	1.64322
TGAAGATGAACCATCTGGG	1700013D24Rik_CCDS51906.1_ex1_6:124356409-124356431:-_5-1	1700013D24Rik	25.3174	17.2415	18.2662	13.3706	0.681012	0.731989	1.4684	1.36614
CAGCACACCAAGAAATGTA	1700013D24Rik_CCDS51906.1_ex2_6:124356872-124356894:-_5-3	1700013D24Rik	3.57941	8.82435	5.61917	4.162	2.46531	0.740678	0.405629	1.35011
GGTCTATCTCGAGCAAAAA	1700013D24Rik_CCDS51906.1_ex2_6:124356892-124356914:+_5-4	1700013D24Rik	3.23119	6.96705	4.16971	7.1972	2.15619	1.72607	0.463781	0.579352
ACTGAGATATTGTTACACC	1700013F07Rik_CCDS51046.1_ex2_3:108543510-108543532:+_5-4	1700013F07Rik	6.78433	4.2799	9.88793	3.67066	0.630852	0.371226	1.58516	2.69377
GCTGTTGCGCAAGGTGAGC	1700013F07Rik_CCDS51046.1_ex1_3:108542506-108542528:-_5-1	1700013F07Rik	20.165	6.17013	18.1706	9.15462	0.305982	0.503816	3.26817	1.98485
TACCCCTGGATATCCTCAA	1700013F07Rik_CCDS51046.1_ex2_3:108543536-108543558:-_5-5	1700013F07Rik	12.5235	9.72665	9.41008	13.4419	0.776671	1.42846	1.28755	0.700054
GTTATACAAGGTTGCTAAG	1700013F07Rik_CCDS51046.1_ex2_3:108543462-108543484:-_5-3	1700013F07Rik	1.85765	4.43797	4.12989	7.42702	2.38902	1.79836	0.418582	0.556063
ATTCCTCTCTAGATACCAA	1700013F07Rik_CCDS51046.1_ex2_3:108543426-108543448:+_5-2	1700013F07Rik	1.90279	2.02085	1.99551	11.437	1.06205	5.73135	0.941579	0.174479
GGGGCGTTCCGTTTGGTCC	1700013G24Rik_CCDS18818.1_ex0_4:137455057-137455079:-_5-5	1700013G24Rik	9.22187	6.60482	11.3454	7.85496	0.716212	0.69235	1.39623	1.44436
CCAATATGAACAACGGCAA	1700013G24Rik_CCDS18818.1_ex0_4:137454635-137454657:+_5-1	1700013G24Rik	6.74564	15.5817	8.84463	6.96738	2.3099	0.787752	0.432919	1.26943
TGCGAAGCCGCCTTCCAAG	1700013G24Rik_CCDS18818.1_ex0_4:137454659-137454681:+_5-2	1700013G24Rik	13.033	15.4237	12.2134	10.4067	1.18344	0.852073	0.844996	1.17361
TGACTCGTCTCTACACACT	1700013G24Rik_CCDS18818.1_ex0_4:137454795-137454817:-_5-4	1700013G24Rik	12.8073	11.2612	7.39517	7.14965	0.879285	0.9668	1.13729	1.03434
GAGTGGCCAGATTGGCCGC	1700013G24Rik_CCDS18818.1_ex0_4:137454699-137454721:-_5-3	1700013G24Rik	7.59039	19.731	11.9984	20.7645	2.59947	1.7306	0.384693	0.577834
GCACCACAAGGGACCCTGG	1700013H16Rik_CCDS53071.1_ex7_X:53751752-53751774:-_5-5	1700013H16Rik	2.7411	3.39736	3.89893	1	1.23941	0.256481	0.806833	3.89893
TAGAACTGTTTACAGATCC	1700013H16Rik_CCDS53071.1_ex6_X:53751023-53751045:-_5-1	1700013H16Rik	2.81848	1.94841	6.40762	1.91135	0.691296	0.298294	1.44656	3.3524
GCATCCCAGGGTTTTGCAG	1700013H16Rik_CCDS53071.1_ex7_X:53751517-53751539:-_5-3	1700013H16Rik	12.4977	5.9923	17.637	7.74401	0.479472	0.439078	2.08563	2.2775
TTTGAAAGCACCCCAACAG	1700013H16Rik_CCDS53071.1_ex7_X:53751579-53751601:-_5-4	1700013H16Rik	2.50251	9.16683	9.7605	7.79156	3.66306	0.798274	0.272996	1.2527
TCAACATCTGATTCATGTC	1700013H16Rik_CCDS53071.1_ex6_X:53751057-53751079:-_5-2	1700013H16Rik	1	1	1.77252	2.30759	1	1.30187	1	0.768124
TTGGGGGACACCCAGAATG	1700015E13Rik_CCDS15471.1_ex1_1:170311538-170311560:+_5-2	1700015E13Rik	4.17267	4.60921	2.89545	1.50719	1.10462	0.520536	0.90529	1.9211
GAGCGTTTACCTGGCAAGC	1700015E13Rik_CCDS15471.1_ex0_1:170308973-170308995:-_5-1	1700015E13Rik	1.73513	8.60701	8.98002	5.66771	4.96043	0.631147	0.201595	1.58442
GTAGCCATTCTGCTGGGCT	1700015E13Rik_CCDS15471.1_ex1_1:170311841-170311863:-_5-5	1700015E13Rik	22.293	14.0142	27.5364	18.1731	0.628638	0.659966	1.59074	1.51523
CATACGAAGTAGCTGTAAG	1700015E13Rik_CCDS15471.1_ex1_1:170311603-170311625:-_5-3	1700015E13Rik	3.80511	11.6432	4.66348	4.58994	3.05989	0.984229	0.326809	1.01602
TTCAGCCACGTCCTCAAGA	1700015E13Rik_CCDS15471.1_ex1_1:170311700-170311722:-_5-4	1700015E13Rik	24.118	44.8177	41.155	41.8365	1.85827	1.01656	0.538135	0.983709
GATTTTCCGCTTCCAGTGA	1700015F17Rik_CCDS51410.1_ex5_5:5478887-5478909:+_5-5	1700015F17Rik	11.4402	21.147	14.9611	12.2532	1.84849	0.819008	0.540982	1.22099
GAAGCAAAATACGTTGAAA	1700015F17Rik_CCDS51410.1_ex5_5:5478866-5478888:-_5-4	1700015F17Rik	1	1	2.76006	2.81478	1	1.01982	1	0.980561
TCTTATCTCGAGTACACAC	1700015F17Rik_CCDS51410.1_ex4_5:5466626-5466648:+_5-2	1700015F17Rik	10.705	5.281	2.59282	3.03667	0.493319	1.17119	2.02708	0.853835
ATTTGGTGCCGAGAAGAAA	1700015F17Rik_CCDS51410.1_ex3_5:5457354-5457376:-_5-1	1700015F17Rik	4.41127	2.19868	1.35838	1.97475	0.498423	1.45375	2.00633	0.687876
CTTGTAGAATGTGCTCAAA	1700015F17Rik_CCDS51410.1_ex4_5:5466657-5466679:-_5-3	1700015F17Rik	7.39694	6.60482	9.2508	13.7748	0.892912	1.48904	1.11993	0.671575
TCAGATGTTTCTACCAGGC	1700015G11Rik_CCDS57552.1_ex2_7:52014855-52014877:-_4-4	1700015G11Rik	9.5314	6.34796	11.2179	8.52064	0.666005	0.759555	1.50149	1.31656
AAACCTACAGAAAGAGAAG	1700015G11Rik_CCDS57552.1_ex1_7:52013536-52013558:-_4-1	1700015G11Rik	2.78624	1	1.89994	2.2125	0.358906	1.16451	2.78624	0.858733
GAAATAAAATTTACCTGCC	1700015G11Rik_CCDS57552.1_ex2_7:52014841-52014863:+_4-3	1700015G11Rik	9.47336	7.36222	4.99001	8.67121	0.77715	1.73771	1.28675	0.575469
TCAATTTTCCTTAAGTCTG	1700015G11Rik_CCDS57552.1_ex1_7:52013580-52013602:-_4-2	1700015G11Rik	16.2766	25.1909	13.3125	23.34	1.54768	1.75324	0.646127	0.570372
ACATCAAAGGCTATTACCC	1700016C15Rik_CCDS48462.1_ex1_1:177741020-177741042:+_5-1	1700016C15Rik	1.98662	2.05378	3.70779	1	1.03381	0.269702	0.967299	3.70779
ACGGAGTTGTGCTCTTGAG	1700016C15Rik_CCDS48462.1_ex2_1:177743276-177743298:-_5-4	1700016C15Rik	8.25459	4.38528	12.1338	6.55529	0.531254	0.54025	1.88234	1.85099
CCTCCCACTGTAATCAAAA	1700016C15Rik_CCDS48462.1_ex1_1:177741058-177741080:-_5-2	1700016C15Rik	9.45402	3.03512	4.95815	5.04165	0.32104	1.01684	3.11487	0.983439
GGTCTAATTGAGGCTGATA	1700016C15Rik_CCDS48462.1_ex2_1:177743294-177743316:-_5-5	1700016C15Rik	8.09983	9.20635	5.84217	10.3513	1.13661	1.77182	0.879809	0.564392
GGAATTGTCAAGTCTATAA	1700016C15Rik_CCDS48462.1_ex2_1:177743256-177743278:-_5-3	1700016C15Rik	1	1	1	2.15702	1	2.15702	1	0.463602
GGGTTATATTTACCGTCAA	1700016D06Rik_CCDS40221.1_ex2_8:11661658-11661680:+_5-1	1700016D06Rik	3.93408	1.88254	6.43948	2.03022	0.478522	0.315278	2.08977	3.1718
CCCTGGCTCCAGAATATCC	1700016D06Rik_CCDS40221.1_ex3_8:11662656-11662678:+_5-2	1700016D06Rik	13.0136	17.9593	10.087	9.52709	1.38004	0.944489	0.724615	1.05877
TGGCCAAATTTAGAAACTC	1700016D06Rik_CCDS40221.1_ex4_8:11665060-11665082:-_5-5	1700016D06Rik	11.7303	7.22391	5.14133	6.80888	0.615831	1.32434	1.62382	0.755091
CCAAGATGAAATTCTAGTC	1700016D06Rik_CCDS40221.1_ex3_8:11662675-11662697:-_5-3	1700016D06Rik	15.7284	5.25466	3.58037	4.91485	0.334086	1.37272	2.99324	0.728479
ATAGCTACAGTGTTTGGTA	1700016D06Rik_CCDS40221.1_ex4_8:11665030-11665052:-_5-4	1700016D06Rik	15.1287	8.49504	8.67739	15.7243	0.561518	1.8121	1.78089	0.551846
ATACGATTTCTCCCAAGAA	1700016H13Rik_CCDS51575.1_ex1_5:103649487-103649509:+_5-3	1700016H13Rik	3.3924	5.68276	5.70678	1.50719	1.67514	0.264105	0.596965	3.78638
TTAACTCACATTGCATTGA	1700016H13Rik_CCDS51575.1_ex1_5:103649412-103649434:+_5-2	1700016H13Rik	10.3826	5.30734	8.43846	5.08127	0.511177	0.602156	1.95627	1.6607
TGCGGAACTCACAAAGACC	1700016H13Rik_CCDS51575.1_ex1_5:103649537-103649559:-_5-5	1700016H13Rik	8.10628	2.80461	6.28816	5.90545	0.34598	0.939139	2.89034	1.06481
TTCGTCAAGTTTGTGTACC	1700016H13Rik_CCDS51575.1_ex1_5:103649519-103649541:+_5-4	1700016H13Rik	8.2417	8.81118	9.01984	9.82031	1.0691	1.08874	0.935368	0.918489
TACTCCTTTTCAAGTGCCA	1700016H13Rik_CCDS51575.1_ex0_5:103648932-103648954:+_5-1	1700016H13Rik	7.84833	8.90997	7.02085	10.6762	1.13527	1.52064	0.880849	0.657618
CAGATAAACATCACAGTCG	1700016K19Rik_CCDS25059.1_ex1_11:76003003-76003025:+_5-3	1700016K19Rik	3.76642	18.1899	8.78888	3.66273	4.82949	0.416746	0.207061	2.39954
AGACTCTCGTTGATCTGGC	1700016K19Rik_CCDS25059.1_ex1_11:76003190-76003212:-_5-5	1700016K19Rik	16.0638	27.2458	31.829	19.4648	1.69611	0.611543	0.589586	1.63521
AGGCGGTGCCCACGATGGG	1700016K19Rik_CCDS25059.1_ex0_11:76000173-76000195:-_5-1	1700016K19Rik	16.6377	8.95607	15.2557	12.0551	0.538301	0.790202	1.8577	1.2655
GATTAATGCTGTACGAATA	1700016K19Rik_CCDS25059.1_ex1_11:76003135-76003157:-_5-4	1700016K19Rik	1	1	4.64755	4.61371	1	0.992718	1	1.00734
AAGGATCGGGCAAGGGCGA	1700016K19Rik_CCDS25059.1_ex0_11:76000245-76000267:+_5-2	1700016K19Rik	26.3169	15.2195	21.6509	32.5883	0.578316	1.50517	1.72916	0.664377
CCAGGACGCTCGTTTGGCC	1700017B05Rik_CCDS23219.1_ex1_9:57257719-57257741:+_5-2	1700017B05Rik	39.717	30.5784	37.3322	25.3925	0.769908	0.680178	1.29886	1.4702
ACAAAGGGTTGCGGTAGAC	1700017B05Rik_CCDS23219.1_ex1_9:57258680-57258702:+_5-4	1700017B05Rik	4.64342	22.1152	11.3613	10.7	4.7627	0.941791	0.209965	1.06181
GCCTTCGAAGTACCCCCTA	1700017B05Rik_CCDS23219.1_ex1_9:57258916-57258938:+_5-5	1700017B05Rik	7.22283	9.34466	11.2976	12.4276	1.29377	1.10002	0.772937	0.909073
TCTTGCGAGGACTACCATC	1700017B05Rik_CCDS23219.1_ex1_9:57258506-57258528:-_5-3	1700017B05Rik	8.19011	7.52688	13.7505	15.7084	0.919021	1.14239	1.08811	0.875358
CGTTGTCAATCACGGGCAT	1700017B05Rik_CCDS23219.1_ex1_9:57257582-57257604:+_5-1	1700017B05Rik	8.55122	12.0186	12.7231	16.6673	1.40549	1.31	0.711497	0.763358
GGCCTAATTCACAATGCAC	1700017D01Rik_CCDS50393.1_ex4_19:11112420-11112442:-_5-5	1700017D01Rik	5.64294	2.91657	6.32798	5.62809	0.516853	0.889397	1.93479	1.12436
ATCCTGAGTTGATGAACTG	1700017D01Rik_CCDS50393.1_ex3_19:11110345-11110367:+_5-4	1700017D01Rik	30.1022	36.5323	39.4108	47.8039	1.21361	1.21296	0.823989	0.824427
TTCCTATTGATTCAAAAAT	1700017D01Rik_CCDS50393.1_ex2_19:11105696-11105718:+_5-1	1700017D01Rik	1	1	1.45395	1.8638	1	1.28189	1	0.7801
AACATCATAAGTATCTTCG	1700017D01Rik_CCDS50393.1_ex2_19:11105754-11105776:-_5-2	1700017D01Rik	2.90876	1	2.29815	2.9495	0.343789	1.28343	2.90876	0.779164
GGATCCAGCAGTATAACTC	1700017D01Rik_CCDS50393.1_ex3_19:11110328-11110350:-_5-3	1700017D01Rik	5.1593	7.2766	5.30061	10.2958	1.41039	1.94238	0.709026	0.514832
AAAAGCGTAGCTCCGACAG	1700017N19Rik_CCDS36047.1_ex4_10:100603544-100603566:+_5-3	1700017N19Rik	4.98519	5.74203	3.81929	3.08422	1.15182	0.807539	0.868193	1.23833
TTAGCCTATTTGAAAGGGC	1700017N19Rik_CCDS36047.1_ex5_10:100605641-100605663:+_5-4	1700017N19Rik	1.99952	5.97255	7.99247	6.99908	2.98699	0.875708	0.334785	1.14193
GGTCTTGATACGTTCTCCA	1700017N19Rik_CCDS36047.1_ex2_10:100601933-100601955:-_5-1	1700017N19Rik	13.5295	3.97036	8.8526	8.21157	0.293459	0.927589	3.40763	1.07806
CAAAATGCTCAAATGTCAA	1700017N19Rik_CCDS36047.1_ex6_10:100609233-100609255:+_5-5	1700017N19Rik	2.05756	8.7058	4.16971	5.0258	4.23113	1.20531	0.236343	0.829661
AAAACTAATGGATGATGAA	1700017N19Rik_CCDS36047.1_ex2_10:100601954-100601976:-_5-2	1700017N19Rik	4.34034	1	1	3.40914	0.230397	3.40914	4.34034	0.293329
GGGACAAAGGCACCCAGTA	1700018B08Rik_CCDS52692.1_ex4_8:121539883-121539905:+_5-4	1700018B08Rik	8.25459	9.944	9.13134	6.91983	1.20466	0.757811	0.830108	1.31959
CGGCAGGACTTCATGGCTC	1700018B08Rik_CCDS52692.1_ex3_8:121535519-121535541:+_5-3	1700018B08Rik	12.401	6.0911	10.5967	10.1928	0.491178	0.961879	2.03592	1.03963
CCTTCCGATGCCCAGGGAC	1700018B08Rik_CCDS52692.1_ex3_8:121535471-121535493:-_5-2	1700018B08Rik	25.1626	21.1207	23.1322	23.5698	0.839368	1.01892	1.19137	0.981433
CAGGGCTGTCATGCCCTAC	1700018B08Rik_CCDS52692.1_ex3_8:121535453-121535475:-_5-1	1700018B08Rik	14.5161	15.9374	8.23936	9.47954	1.09791	1.15052	0.910821	0.869173
GTGCATCAGCCCGGGGCAC	1700018B08Rik_CCDS52692.1_ex4_8:121539910-121539932:+_5-5	1700018B08Rik	12.588	9.20635	8.93224	10.7475	0.731359	1.20323	1.36732	0.831098
CTCTCTTGGCTTGGAACCT	1700018C11Rik_CCDS18262.1_ex2_4:63611879-63611901:+_5-5	1700018C11Rik	21.0743	16.8924	16.8167	23.2053	0.801565	1.3799	1.24756	0.724692
TGCTTTTCTTGGCCAACGA	1700018C11Rik_CCDS18262.1_ex1_4:63608482-63608504:+_5-2	1700018C11Rik	24.047	22.1218	23.8808	34.1812	0.919939	1.43132	1.08703	0.698655
CCTACTGTAGGTTGGTGTC	1700018C11Rik_CCDS18262.1_ex2_4:63611857-63611879:+_5-4	1700018C11Rik	18.411	13.1317	15.3513	22.1275	0.713252	1.44141	1.40203	0.693765
CTACCGCACAGTCCGTCGT	1700018C11Rik_CCDS18262.1_ex1_4:63608495-63608517:-_5-3	1700018C11Rik	18.8431	15.8847	9.15523	21.7947	0.843	2.38057	1.18624	0.420067
CTGCCAGCAGTGATTATGA	1700018C11Rik_CCDS18262.1_ex1_4:63608456-63608478:-_5-1	1700018C11Rik	11.4724	13.9615	1.67695	4.16992	1.21697	2.48661	0.821714	0.402153
GGCAGTTGATGGACTACGC	1700018F24Rik_CCDS51696.1_ex3_5:145044798-145044820:+_5-5	1700018F24Rik	31.3403	49.54	32.0361	25.4084	1.58071	0.793118	0.632627	1.26085
GCTGATGGATAGTTGGTCG	1700018F24Rik_CCDS51696.1_ex1_5:145043470-145043492:-_5-3	1700018F24Rik	27.6969	10.438	26.071	21.9453	0.376864	0.841751	2.65348	1.188
CGTGGTAATGAACTGCAGC	1700018F24Rik_CCDS51696.1_ex1_5:145043453-145043475:-_5-2	1700018F24Rik	7.18414	31.1185	16.737	16.2711	4.33155	0.972161	0.230864	1.02864
GTACCTATGGTAGACAGCC	1700018F24Rik_CCDS51696.1_ex1_5:145043497-145043519:-_5-4	1700018F24Rik	23.0024	22.2469	14.7301	15.1696	0.967158	1.02983	1.03396	0.971031
GTAGGTTATACGGAAAGTC	1700018F24Rik_CCDS51696.1_ex1_5:145043378-145043400:-_5-1	1700018F24Rik	6.32648	8.06036	3.61222	10.1611	1.27407	2.81297	0.784889	0.355496
ATCTCATAAAGTATCCCTC	1700019A02Rik_CCDS48258.1_ex4_1:53177797-53177819:-_5-3	1700019A02Rik	1.01935	5.5642	3.73168	1	5.4586	0.267976	0.183197	3.73168
GCATCAATGACAGATGAAG	1700019A02Rik_CCDS48258.1_ex4_1:53177769-53177791:-_5-1	1700019A02Rik	5.96537	10.0296	5.60325	5.09712	1.68131	0.909673	0.594775	1.0993
ATTGATGCAATACTCCTGA	1700019A02Rik_CCDS48258.1_ex4_1:53177782-53177804:+_5-2	1700019A02Rik	6.26845	3.45005	7.25181	6.66624	0.550383	0.919251	1.81692	1.08784
CTGAAGCTCTGAATGAAGA	1700019A02Rik_CCDS48258.1_ex5_1:53181864-53181886:-_5-4	1700019A02Rik	2.79914	3.37102	5.91385	7.1655	1.2043	1.21165	0.830355	0.825322
GAAGCCTATTTAGAAGAAC	1700019A02Rik_CCDS48258.1_ex6_1:53182518-53182540:-_5-5	1700019A02Rik	1.0129	3.50274	1.94773	5.20807	3.45814	2.67392	0.289173	0.373982
CCATTGCACGTACTGACTA	1700019B03Rik_CCDS52467.1_ex0_8:3476203-3476225:+_5-3	1700019B03Rik	6.45545	12.7958	12.9143	6.63454	1.98217	0.513736	0.504498	1.94652
TGCACGCGGATATGCGTCC	1700019B03Rik_CCDS52467.1_ex0_8:3476170-3476192:+_5-2	1700019B03Rik	33.0298	16.8529	25.1949	17.9195	0.510232	0.711233	1.95989	1.40601
CCGGGATTCAATGCCCTCG	1700019B03Rik_CCDS52467.1_ex0_8:3476285-3476307:+_5-4	1700019B03Rik	17.9338	25.7705	22.2243	19.3855	1.43698	0.872268	0.695905	1.14644
CATCTTGCGACTGTAACGT	1700019B03Rik_CCDS52467.1_ex0_8:3476092-3476114:-_5-1	1700019B03Rik	10.9436	21.1602	11.7993	12.491	1.93357	1.05862	0.517179	0.944627
GGATAGTGTGCCTGGTACG	1700019B03Rik_CCDS52467.1_ex0_8:3476336-3476358:-_5-5	1700019B03Rik	17.5856	14.0142	15.3672	16.7624	0.796915	1.09079	1.25484	0.916766
AATATAGGACACCTTCTCC	1700019D03Rik_CCDS14949.1_ex0_1:52925443-52925465:-_5-5	1700019D03Rik	2.74755	2.61361	6.12888	3.32989	0.95125	0.543312	1.05125	1.84056
TGGGAGTTTCTTTACTTCC	1700019D03Rik_CCDS14949.1_ex0_1:52925405-52925427:+_5-4	1700019D03Rik	4.7208	4.94511	6.11295	4.05897	1.04751	0.663996	0.954641	1.50603
TCTGCGAATTCAAGGATCA	1700019D03Rik_CCDS14949.1_ex0_1:52925361-52925383:+_5-2	1700019D03Rik	6.57153	8.23818	6.21648	6.9436	1.25362	1.11697	0.797691	0.895282
CGATCACAGCACCGGGCTC	1700019D03Rik_CCDS14949.1_ex0_1:52925386-52925408:+_5-3	1700019D03Rik	24.363	30.9341	23.6021	29.2757	1.26971	1.24039	0.787579	0.806201
GCATCCTCCACAATTTCAC	1700019D03Rik_CCDS14949.1_ex0_1:52925331-52925353:+_5-1	1700019D03Rik	5.10771	1	7.22792	9.39237	0.195782	1.29946	5.10771	0.769553
ACACTAGGACTATGGTCAC	1700019G17Rik_CCDS39540.1_ex0_6:85901370-85901392:+_5-4	1700019G17Rik	12.401	12.4467	16.5698	6.84851	1.00369	0.413312	0.996325	2.41948
AAGCCAGATAAGGAGCCGC	1700019G17Rik_CCDS39540.1_ex0_6:85901299-85901321:+_5-2	1700019G17Rik	22.2221	2.89023	19.5245	9.47162	0.130061	0.485115	7.68871	2.06137
AAAGCTGCATACTGTGGCC	1700019G17Rik_CCDS39540.1_ex0_6:85901335-85901357:+_5-3	1700019G17Rik	17.2696	24.1701	17.6051	16.3345	1.39957	0.927826	0.714504	1.07779
AGGCACCCCAGGTAAAAGC	1700019G17Rik_CCDS39540.1_ex0_6:85901389-85901411:+_5-5	1700019G17Rik	1	1	1	1	1	1	1	1
CTTTCTTGGAGAAATTACG	1700019G17Rik_CCDS39540.1_ex0_6:85901281-85901303:-_5-1	1700019G17Rik	5.94602	17.1558	6.86954	7.75986	2.88526	1.1296	0.346589	0.885266
GAGAACATCGCCCTCGGTG	1700019L03Rik_CCDS15932.1_ex7_2:32781348-32781370:-_5-2	1700019L03Rik	6.64246	20.1723	18.9033	13.7748	3.03687	0.728698	0.329286	1.37231
GACGCGTTCGAGGCCCAAC	1700019L03Rik_CCDS15932.1_ex7_2:32781417-32781439:-_5-4	1700019L03Rik	6.82302	8.12622	7.21199	8.16402	1.191	1.13201	0.83963	0.883387
TGGAATTCATGGCGCACCT	1700019L03Rik_CCDS15932.1_ex7_2:32781394-32781416:+_5-3	1700019L03Rik	20.5584	14.8507	8.4305	10.7	0.722366	1.2692	1.38434	0.7879
TCCCATTTCCGCTGATACC	1700019L03Rik_CCDS15932.1_ex7_2:32781607-32781629:+_5-5	1700019L03Rik	16.1347	3.03512	11.6639	18.4108	0.188112	1.57844	5.316	0.633537
TTCTCTAGGATGGCCCGCC	1700019L03Rik_CCDS15932.1_ex5_2:32779871-32779893:+_5-1	1700019L03Rik	20.236	9.04169	14.0293	24.7189	0.446813	1.76196	2.23807	0.567551
AGAACGCAGAGATACAAGG	1700019N19Rik_CCDS38031.1_ex3_19:58789199-58789221:-_5-4	1700019N19Rik	4.36613	4.71459	4.01043	1	1.07981	0.24935	0.926089	4.01043
AGGGCCATACCCAGAGTCA	1700019N19Rik_CCDS38031.1_ex3_19:58789068-58789090:+_5-2	1700019N19Rik	13.0652	11.9396	6.39169	6.93568	0.913848	1.08511	1.09427	0.921567
GCCACAAGGTATACCATCA	1700019N19Rik_CCDS38031.1_ex2_19:58787608-58787630:-_5-1	1700019N19Rik	6.62311	4.10866	7.25978	9.95503	0.620352	1.37126	1.61199	0.729257
TCCTGGAACGCTTTCACAC	1700019N19Rik_CCDS38031.1_ex3_19:58789221-58789243:+_5-5	1700019N19Rik	13.4714	29.933	15.7097	26.4545	2.22196	1.68396	0.450054	0.593838
AGAGCAGTTTAATCCCTGC	1700019N19Rik_CCDS38031.1_ex3_19:58789175-58789197:+_5-3	1700019N19Rik	19.6943	18.6245	9.28266	18.6961	0.945683	2.01409	1.05744	0.496503
GTCACTCGGGGAAACCGTC	1700019O17Rik_CCDS56635.1_ex0_1:86427159-86427181:-_5-5	1700019O17Rik	2.70241	15.2788	9.80829	4.20955	5.65376	0.429183	0.176873	2.33001
TGGTGGGACGTCATCGGGC	1700019O17Rik_CCDS56635.1_ex0_1:86426502-86426524:-_5-2	1700019O17Rik	18.3723	7.38198	25.394	29.0221	0.401799	1.14287	2.48881	0.874989
CAACCGTACAAGTCGGAGC	1700019O17Rik_CCDS56635.1_ex0_1:86427140-86427162:+_5-4	1700019O17Rik	11.8206	17.7025	12.5081	14.6307	1.49759	1.16969	0.667738	0.854925
ATTTACCCGGAGAGTCCGA	1700019O17Rik_CCDS56635.1_ex0_1:86426470-86426492:+_5-1	1700019O17Rik	26.5878	31.4017	25.0755	35.2035	1.18106	1.4039	0.846698	0.712301
GTGATGGCTTTCGCCTCAG	1700019O17Rik_CCDS56635.1_ex0_1:86426567-86426589:-_5-3	1700019O17Rik	17.5082	13.3227	10.971	16.382	0.760939	1.49321	1.31417	0.669699
CGACACAGACTTCTCCCAA	1700020A23Rik_CCDS50710.1_ex1_2:130405802-130405824:+_5-3	1700020A23Rik	4.42417	10.1943	6.33594	1.59436	2.30422	0.251637	0.433986	3.97397
GGCCATCTTTGTTGGAGAG	1700020A23Rik_CCDS50710.1_ex1_2:130405871-130405893:-_5-5	1700020A23Rik	12.1882	23.4785	11.3135	10.9298	1.92633	0.966083	0.519121	1.03511
ATTCGAACCATCTTCTCAA	1700020A23Rik_CCDS50710.1_ex0_2:130405620-130405642:+_5-1	1700020A23Rik	5.90733	5.38638	2.38575	3.34574	0.911813	1.40238	1.09672	0.713071
TGGCACTTACCCATAGAGC	1700020A23Rik_CCDS50710.1_ex0_2:130405692-130405714:-_5-2	1700020A23Rik	18.9849	3.47639	7.34738	10.8902	0.183113	1.48218	5.4611	0.674681
CTCCCAATGGGTCAGAGCC	1700020A23Rik_CCDS50710.1_ex1_2:130405814-130405836:+_5-4	1700020A23Rik	21.0162	12.9341	14.4275	28.3485	0.615434	1.9649	1.62487	0.508932
TTCGTCGTCGGTGGAAGAG	1700020L24Rik_CCDS25165.1_ex1_11:83440374-83440396:+_5-1	1700020L24Rik	16.9794	11.169	22.4792	14.3771	0.657796	0.639573	1.52023	1.56354
TGCTGGACTCCTGGCGCAG	1700020L24Rik_CCDS25165.1_ex1_11:83440478-83440500:-_5-3	1700020L24Rik	29.251	22.9385	40.8683	36.9311	0.784195	0.903661	1.27519	1.10661
TCGCGCTCTTCCGCGTCTC	1700020L24Rik_CCDS25165.1_ex1_11:83440434-83440456:-_5-2	1700020L24Rik	17.289	23.4456	13.6231	12.6653	1.3561	0.929695	0.737408	1.07562
GCCCGTTCGCTCTGCTGGG	1700020L24Rik_CCDS25165.1_ex1_11:83440553-83440575:+_5-4	1700020L24Rik	31.9013	29.7288	23.4508	22.5951	0.931898	0.963511	1.07308	1.03787
AACACGCACGGTTCCTCCG	1700020L24Rik_CCDS25165.1_ex2_11:83440687-83440709:-_5-5	1700020L24Rik	10.2149	14.0142	10.1109	11.8411	1.37193	1.17112	0.728898	0.853881
TGAATATGTTCATAAACAC	1700020N15Rik_CCDS57758.1_ex1_X:69945617-69945639:-_5-2	1700020N15Rik	9.1058	3.38419	5.37229	1.28529	0.371652	0.239245	2.69069	4.17982
AAATTCAAATATAAAGTCA	1700020N15Rik_CCDS57758.1_ex0_X:69945429-69945451:+_5-1	1700020N15Rik	1	1	1	1	1	1	1	1
CTCATTTACGCGATGGTAA	1700020N15Rik_CCDS57758.1_ex1_X:69945727-69945749:-_5-5	1700020N15Rik	21.6998	23.4851	22.9092	27.5402	1.08228	1.20214	0.923979	0.831847
CTTTCTTCACCTTAACCAA	1700020N15Rik_CCDS57758.1_ex1_X:69945683-69945705:-_5-4	1700020N15Rik	19.1075	21.9308	13.6072	21.0656	1.14776	1.54813	0.871262	0.645942
GGGAGTCTGAGCTCTTGGG	1700020N15Rik_CCDS57758.1_ex1_X:69945664-69945686:-_5-3	1700020N15Rik	3.43754	7.32271	1.50174	4.57409	2.13022	3.04586	0.469436	0.328314
TCGCTCCTCTCGGGGTAAC	1700021F05Rik_CCDS23820.1_ex2_10:43532795-43532817:+_5-4	1700021F05Rik	13.3618	8.36332	14.1646	8.29875	0.625911	0.585877	1.59767	1.70684
TTTTGAGTCGTATAGAAAA	1700021F05Rik_CCDS23820.1_ex2_10:43532892-43532914:+_5-5	1700021F05Rik	1	1	1	1	1	1	1	1
TGAAGACGGGCCTTGACGT	1700021F05Rik_CCDS23820.1_ex2_10:43532682-43532704:-_5-2	1700021F05Rik	1	1	1	1	1	1	1	1
TAGAAGATGCATTCTACAA	1700021F05Rik_CCDS23820.1_ex1_10:43530644-43530666:-_5-1	1700021F05Rik	1.01935	5.61031	1	1	5.50383	1	0.181692	1
AGTGAGCCTGGTGTGGCGA	1700021F05Rik_CCDS23820.1_ex2_10:43532755-43532777:-_5-3	1700021F05Rik	22.667	15.5488	20.4961	33.246	0.685965	1.62207	1.4578	0.616498
CAGCTGCTTGAGGGTGAAG	1700021F07Rik_CCDS50814.1_ex2_2:173527841-173527863:+_5-4	1700021F07Rik	18.5013	9.29197	12.4842	6.24622	0.502233	0.500329	1.99111	1.99868
GACGGACATAGAAGTGGCT	1700021F07Rik_CCDS50814.1_ex2_2:173527896-173527918:-_5-5	1700021F07Rik	17.0633	13.6849	25.0595	18.9418	0.802011	0.755871	1.24687	1.32298
GCAAAACTGGCCGGCCAAG	1700021F07Rik_CCDS50814.1_ex1_2:173526036-173526058:+_5-2	1700021F07Rik	23.544	18.7497	36.6154	30.4644	0.796366	0.832011	1.2557	1.20191
GAGGGCCGAAAGTGAAGCC	1700021F07Rik_CCDS50814.1_ex1_2:173526015-173526037:+_5-1	1700021F07Rik	16.8569	8.35015	11.8869	11.2151	0.495354	0.943481	2.01876	1.05991
TTAACAACGTCCATGAAAG	1700021F07Rik_CCDS50814.1_ex1_2:173526064-173526086:+_5-3	1700021F07Rik	1.91569	6.55871	1.88401	2.03022	3.42368	1.07761	0.292083	0.927983
ACTCTGACTAGCCCCCTAG	1700021K19Rik_CCDS28124.1_ex12_16:32843346-32843368:-_5-4	1700021K19Rik	21.8287	20.1525	18.0352	15.1537	0.923211	0.840229	1.08318	1.19015
GGCCCGAGTACCTGGCCAT	1700021K19Rik_CCDS28124.1_ex12_16:32843276-32843298:-_5-3	1700021K19Rik	25.7108	41.8144	21.2049	19.2271	1.62634	0.906727	0.614878	1.10287
TCTTTGTCCCGCTGGCGAC	1700021K19Rik_CCDS28124.1_ex12_16:32843051-32843073:+_5-2	1700021K19Rik	20.5648	12.5785	19.7395	20.1067	0.611649	1.0186	1.63492	0.981738
GGTAATTTGAAGACGACTG	1700021K19Rik_CCDS28124.1_ex17_16:32857002-32857024:-_5-5	1700021K19Rik	2.24457	3.04829	2.16276	4.34427	1.35808	2.00867	0.736335	0.497842
GTCCGAGTGGGAGCGAATA	1700021K19Rik_CCDS28124.1_ex12_16:32843025-32843047:+_5-1	1700021K19Rik	9.38953	20.5016	10.6127	22.2385	2.18345	2.09547	0.45799	0.477221
TCACAGTACCCGTGACTGA	1700022I11Rik_CCDS51160.1_ex1_4:42971965-42971987:+_5-5	1700022I11Rik	42.9864	39.2853	26.6523	29.355	0.913902	1.1014	1.09421	0.907934
GGTTTGGCAGATCCGAAGA	1700022I11Rik_CCDS51160.1_ex0_4:42970121-42970143:+_5-1	1700022I11Rik	4.27585	6.72995	2.29018	3.02083	1.57394	1.31903	0.635346	0.758132
AGGTTGTACGCAGGTGGAA	1700022I11Rik_CCDS51160.1_ex1_4:42971318-42971340:-_5-2	1700022I11Rik	32.8751	23.1492	18.3936	32.7785	0.704158	1.78206	1.42014	0.561148
GATTGGACTAGTTGAGAAC	1700022I11Rik_CCDS51160.1_ex1_4:42971420-42971442:-_5-3	1700022I11Rik	4.76594	3.1405	2.33797	5.29524	0.658947	2.26489	1.51757	0.441522
AGGATACCAGTGGTATAGG	1700022I11Rik_CCDS51160.1_ex1_4:42971452-42971474:-_5-4	1700022I11Rik	8.58347	12.4467	3.15827	8.39384	1.45008	2.65774	0.689616	0.37626
CAGAAGAGGCACTTCAGCA	1700022P22Rik_CCDS48483.1_ex0_1:191039717-191039739:+_5-4	1700022P22Rik	4.61762	18.6509	11.7436	5.75488	4.03907	0.490046	0.247582	2.04063
CCTGCTGAGAGTTCAGAAG	1700022P22Rik_CCDS48483.1_ex0_1:191039704-191039726:+_5-3	1700022P22Rik	17.3148	13.7376	13.7187	10.1769	0.793405	0.741831	1.26039	1.34802
ATGCATGCAAGCTAAGGTC	1700022P22Rik_CCDS48483.1_ex0_1:191039744-191039766:-_5-5	1700022P22Rik	3.74707	10.2272	11.2896	10.4701	2.72938	0.927414	0.366383	1.07827
CGCGAGTCCTACTGCCTGG	1700022P22Rik_CCDS48483.1_ex0_1:191039663-191039685:+_5-1	1700022P22Rik	31.9465	18.3809	32.1237	30.8369	0.575364	0.959943	1.73803	1.04173
TTCGTTGCTTCTTTCCACC	1700022P22Rik_CCDS48483.1_ex0_1:191039678-191039700:-_5-2	1700022P22Rik	4.12109	4.83973	8.01637	8.99613	1.17438	1.12222	0.851512	0.891091
TACCTACCACGGCTCCAGC	1700023E05Rik_CCDS19369.1_ex0_5:77016604-77016626:+_5-4	1700023E05Rik	16.5861	20.9429	19.405	18.6882	1.26268	0.963058	0.791968	1.03836
GCAATGGGGAACTCCGGAC	1700023E05Rik_CCDS19369.1_ex2_5:77044060-77044082:+_5-5	1700023E05Rik	11.6465	8.47528	8.19954	8.38592	0.72771	1.02273	1.37417	0.977775
GATTCCCTCCGGTCTCGCA	1700023E05Rik_CCDS19369.1_ex0_5:77016430-77016452:+_5-1	1700023E05Rik	25.4206	22.0625	23.5304	26.2167	0.8679	1.11416	1.15221	0.897535
CTGGCTATCAAAGATGGGG	1700023E05Rik_CCDS19369.1_ex0_5:77016582-77016604:-_5-3	1700023E05Rik	18.1079	18.9736	12.0621	15.9145	1.04781	1.31938	0.954375	0.757934
GGCGCTCGGATGACTGAAG	1700023E05Rik_CCDS19369.1_ex0_5:77016515-77016537:-_5-2	1700023E05Rik	8.16431	9.09438	9.68883	13.0378	1.11392	1.34565	0.897731	0.743135
ATCGGGTCGGTGAGCCCCC	1700023F06Rik_CCDS56813.1_ex3_11:103200147-103200169:-_5-1	1700023F06Rik	11.2209	9.46321	11.4489	6.46019	0.843354	0.564263	1.18574	1.77222
TGGATACCCGCGTTGCGCA	1700023F06Rik_CCDS56813.1_ex5_11:103200840-103200862:+_5-5	1700023F06Rik	9.71841	13.1646	18.4573	13.2834	1.35461	0.719686	0.738221	1.3895
ATGTGCGAGGCTCTTCGGC	1700023F06Rik_CCDS56813.1_ex5_11:103200803-103200825:-_5-4	1700023F06Rik	31.5467	17.6037	25.2746	19.7659	0.558021	0.782049	1.79205	1.27869
CCCTACTCAGGCCAAATGA	1700023F06Rik_CCDS56813.1_ex3_11:103200172-103200194:-_5-2	1700023F06Rik	9.9699	14.3699	7.90487	9.73314	1.44133	1.23128	0.693805	0.812161
CAGACGGTGGTTGTCAGTA	1700023F06Rik_CCDS56813.1_ex4_11:103200280-103200302:+_5-3	1700023F06Rik	16.2895	3.32491	13.7505	19.7501	0.204114	1.43632	4.89921	0.696225
CAGCTGTGTTGGCCAAAGA	1700024G13Rik_CCDS36867.1_ex1_14:32377953-32377975:-_5-3	1700024G13Rik	18.4562	17.2151	15.8849	8.9882	0.932757	0.565834	1.07209	1.7673
ACTGCAGGGTCTGCAAGGT	1700024G13Rik_CCDS36867.1_ex2_14:32388251-32388273:-_5-4	1700024G13Rik	17.1665	14.7255	18.075	16.3583	0.857809	0.905021	1.16576	1.10495
GACGGACATCAGATCATCC	1700024G13Rik_CCDS36867.1_ex1_14:32377936-32377958:-_5-2	1700024G13Rik	14.1163	7.23709	13.1134	16.5405	0.512676	1.26135	1.95055	0.792803
CCTGGAGCAGATAGAAGAC	1700024G13Rik_CCDS36867.1_ex1_14:32377919-32377941:-_5-1	1700024G13Rik	4.68211	6.32161	2.76803	3.54386	1.35016	1.28028	0.740651	0.781077
ACCGCACCTACCGACTGCA	1700024G13Rik_CCDS36867.1_ex2_14:32388264-32388286:-_5-5	1700024G13Rik	19.7136	19.9681	19.5643	27.7779	1.01291	1.41983	0.987255	0.704311
TTCATGATGTCCACAGAAT	1700024P04Rik_CCDS49342.1_ex0_13:98984331-98984353:+_5-2	1700024P04Rik	1.81251	4.1416	7.37127	3.29819	2.285	0.447439	0.437637	2.23494
GTAAAGGGAGTAATTTCCA	1700024P04Rik_CCDS49342.1_ex0_13:98984399-98984421:+_5-4	1700024P04Rik	1	1	1.8203	1	1	0.54936	1	1.8203
AAGGAAGTTGTCCCTAACA	1700024P04Rik_CCDS49342.1_ex0_13:98984363-98984385:-_5-3	1700024P04Rik	1.00645	2.64654	4.64755	3.66273	2.62958	0.788099	0.380289	1.26888
ATCTTCGAACGCATTGCTA	1700024P04Rik_CCDS49342.1_ex0_13:98984294-98984316:-_5-1	1700024P04Rik	9.58944	3.29198	8.69331	10.3988	0.343292	1.19619	2.91297	0.835991
CTAGCATCAATTTGGGCCA	1700024P04Rik_CCDS49342.1_ex0_13:98984416-98984438:-_5-5	1700024P04Rik	23.0798	27.6146	25.3701	35.7027	1.19649	1.40727	0.835779	0.710594
AAGGTCTTAATCCCGCCAT	1700024P16Rik_CCDS51250.1_ex1_4:104945573-104945595:-_5-3	1700024P16Rik	9.5443	11.0966	16.1079	8.98028	1.16264	0.557508	0.860112	1.7937
GCTTTCGAGACACGCCAGC	1700024P16Rik_CCDS51250.1_ex1_4:104945185-104945207:-_5-2	1700024P16Rik	7.15189	3.06805	13.4319	8.90896	0.428985	0.663266	2.33109	1.50769
GTCCTCCTAGGCAGCGACT	1700024P16Rik_CCDS51250.1_ex0_4:104913656-104913678:-_5-1	1700024P16Rik	29.1736	23.8605	23.7056	19.1557	0.817881	0.808067	1.22267	1.23752
GACCGAGGGTCTCAATGGA	1700024P16Rik_CCDS51250.1_ex2_4:104948721-104948743:-_5-4	1700024P16Rik	13.71	8.94949	11.1542	15.9858	0.652769	1.43316	1.53194	0.697758
CATAGAGGTTCACGAATGG	1700024P16Rik_CCDS51250.1_ex2_4:104948766-104948788:-_5-5	1700024P16Rik	9.46047	3.30515	2.76006	6.84058	0.349365	2.47841	2.86234	0.403484
AAGTGTATATTCTACCCTG	1700025F22Rik_CCDS50394.1_ex1_19:11142343-11142365:-_5-2	1700025F22Rik	3.58586	5.67617	4.80684	2.27589	1.58293	0.47347	0.631739	2.11207
TAATCTGTTCTAGCTGATC	1700025F22Rik_CCDS50394.1_ex1_19:11142445-11142467:-_5-4	1700025F22Rik	10.1053	10.0625	9.51362	6.42057	0.995767	0.674882	1.00425	1.48174
CATACTTACATATTGCCAC	1700025F22Rik_CCDS50394.1_ex1_19:11142327-11142349:+_5-1	1700025F22Rik	8.93169	7.04609	5.84217	4.46314	0.788887	0.763953	1.26761	1.30898
AAGAGGCCTTCAAATCATA	1700025F22Rik_CCDS50394.1_ex2_19:11146728-11146750:-_5-5	1700025F22Rik	2.70886	4.51042	3.13438	3.9718	1.66506	1.26717	0.600578	0.789157
GCATCTTCGCAACACTAGT	1700025F22Rik_CCDS50394.1_ex1_19:11142401-11142423:-_5-3	1700025F22Rik	8.10628	9.69372	9.15523	14.2186	1.19583	1.55305	0.83624	0.643892
AAACTAATAAAGAAATCCC	1700025G04Rik_CCDS35737.1_ex2_1:151921071-151921093:-_5-2	1700025G04Rik	1.00645	3.16026	1.86012	1	3.14001	0.537599	0.31847	1.86012
TTAAGCCTTGTGTTCGAGC	1700025G04Rik_CCDS35737.1_ex2_1:151921091-151921113:+_5-3	1700025G04Rik	8.85431	16.1811	21.2208	18.1968	1.82748	0.857498	0.547201	1.16618
GGTCAAATACATGAAAAAT	1700025G04Rik_CCDS35737.1_ex3_1:151980471-151980493:-_5-4	1700025G04Rik	1	1	1	1	1	1	1	1
GAGTATAGGATCAAACCCG	1700025G04Rik_CCDS35737.1_ex3_1:151980497-151980519:-_5-5	1700025G04Rik	4.98519	1	5.27672	5.42204	0.200594	1.02754	4.98519	0.973198
GGGTTGATGAACTAATCCA	1700025G04Rik_CCDS35737.1_ex2_1:151921054-151921076:+_5-1	1700025G04Rik	9.60233	6.69702	4.7033	6.2066	0.697437	1.31963	1.43382	0.757791
GATCACTTTATCGCCATAG	1700026D08Rik_CCDS21413.1_ex4_7:83793390-83793412:+_5-4	1700026D08Rik	12.1302	5.36003	15.4947	5.35072	0.441877	0.345327	2.26307	2.89581
GAGCGTCTCTACCTCAAAA	1700026D08Rik_CCDS21413.1_ex4_7:83793196-83793218:+_5-2	1700026D08Rik	5.16575	1.96158	4.3927	4.75636	0.379728	1.08279	2.63346	0.923544
AGCTTTCGGTATCGGAAGA	1700026D08Rik_CCDS21413.1_ex4_7:83793419-83793441:-_5-5	1700026D08Rik	19.604	10.9319	23.4986	27.3104	0.557637	1.16221	1.79328	0.860427
GACCATCGCCCCGATGGGC	1700026D08Rik_CCDS21413.1_ex4_7:83793229-83793251:-_5-3	1700026D08Rik	21.1323	30.0186	21.7226	25.7333	1.42051	1.18463	0.703974	0.844142
GGCGCAAACAGCTGCGAAA	1700026D08Rik_CCDS21413.1_ex3_7:83791697-83791719:-_5-1	1700026D08Rik	11.4595	9.40393	9.63308	14.2186	0.820623	1.47602	1.21859	0.6775
GGCATCACCTGCTCGATAC	1700026L06Rik_CCDS15845.1_ex3_2:28695898-28695920:+_5-4	1700026L06Rik	9.57009	10.5697	12.6037	7.75986	1.10445	0.615682	0.905429	1.62422
CAATAACTCCACCCACCGG	1700026L06Rik_CCDS15845.1_ex2_2:28693779-28693801:-_5-3	1700026L06Rik	18.0177	14.2777	14.2523	11.5638	0.792427	0.811364	1.26195	1.23249
TCATTGCTTTGGCTGACCA	1700026L06Rik_CCDS15845.1_ex2_2:28693644-28693666:+_5-1	1700026L06Rik	7.06806	10.899	22.2482	22.8091	1.542	1.02521	0.648506	0.975411
GAATGCCCACGACAAAATC	1700026L06Rik_CCDS15845.1_ex3_2:28695928-28695950:-_5-5	1700026L06Rik	1	1	1.84419	1.9272	1	1.04501	1	0.956928
ATGATCAGAATCCGCCGGT	1700026L06Rik_CCDS15845.1_ex2_2:28693767-28693789:+_5-2	1700026L06Rik	10.9888	21.7727	13.5753	19.1003	1.98136	1.40699	0.504703	0.710739
TTCTATTTGCTCCACTCCA	1700028K03Rik_CCDS19504.1_ex2_5:107545795-107545817:+_5-4	1700028K03Rik	13.1942	16.3062	21.9615	10.1611	1.23587	0.462677	0.809149	2.16134
ATTCTTCAGGCCCATGGAG	1700028K03Rik_CCDS19504.1_ex2_5:107545807-107545829:-_5-5	1700028K03Rik	15.9606	11.2744	12.1975	10.5494	0.70639	0.86488	1.41565	1.15623
ATTCTGATACACTGGAAAG	1700028K03Rik_CCDS19504.1_ex1_5:107543968-107543990:+_5-1	1700028K03Rik	1.92214	6.13061	6.79786	8.03723	3.18947	1.18232	0.313531	0.845797
CGATTGTATTTTCTCTGTC	1700028K03Rik_CCDS19504.1_ex1_5:107543992-107544014:+_5-2	1700028K03Rik	14.1292	16.1218	9.72865	15.5816	1.14103	1.60162	0.876403	0.624366
GCTAAGGAGTGTATGACAT	1700028K03Rik_CCDS19504.1_ex2_5:107545710-107545732:+_5-3	1700028K03Rik	7.17124	3.24588	5.93774	11.1834	0.452624	1.88344	2.20934	0.530943
TGAGGAAACACTATGCCCC	1700028P14Rik_CCDS29708.1_ex3_19:23593038-23593060:-_5-3	1700028P14Rik	8.58992	11.7025	9.1393	4.52654	1.36235	0.495283	0.734024	2.01905
ATGCCCCGGGATTTTGGAA	1700028P14Rik_CCDS29708.1_ex3_19:23593026-23593048:-_5-2	1700028P14Rik	9.94411	9.39735	13.5594	13.22	0.945017	0.974975	1.05818	1.02567
ACCCTGAATTGCCTCCCAC	1700028P14Rik_CCDS29708.1_ex2_19:23592154-23592176:-_5-1	1700028P14Rik	7.01648	6.57847	17.1751	17.1428	0.937575	0.998123	1.06658	1.00188
GATTATGATATAGAGAGTC	1700028P14Rik_CCDS29708.1_ex4_19:23616575-23616597:-_5-5	1700028P14Rik	1	1	1	1	1	1	1	1
TCGGAAGCACGTGAACAGA	1700028P14Rik_CCDS29708.1_ex3_19:23593115-23593137:-_5-4	1700028P14Rik	7.53236	13.8957	6.71026	10.0184	1.8448	1.493	0.542064	0.669791
GCAGCACTGACAATCCACG	1700029F12Rik_CCDS36755.1_ex1_13:97030256-97030278:+_5-2	1700029F12Rik	10.2665	9.20635	15.415	17.761	0.896734	1.15219	1.11516	0.867915
AGTCCACGCAGTATAGCAG	1700029F12Rik_CCDS36755.1_ex1_13:97030305-97030327:+_5-3	1700029F12Rik	18.3659	17.663	16.4264	19.8769	0.961727	1.21005	1.0398	0.82641
CATTGGTTCTCCGGGTCAG	1700029F12Rik_CCDS36755.1_ex1_13:97030355-97030377:+_5-4	1700029F12Rik	30.7599	30.7036	27.8788	35.8216	0.998167	1.2849	1.00184	0.778268
GTGAGTCTCATAGCAGTCG	1700029F12Rik_CCDS36755.1_ex1_13:97030213-97030235:+_5-1	1700029F12Rik	13.9615	15.1405	12.2453	24.4653	1.08444	1.99794	0.922134	0.500516
GACAGCTGTGGAGCTCAAG	1700029F12Rik_CCDS36755.1_ex1_13:97030401-97030423:-_5-5	1700029F12Rik	2.71531	6.08451	3.4609	9.34482	2.24082	2.70011	0.446266	0.370355
TGGAGTTCCGCCCCGTCAC	1700029H14Rik_CCDS40233.1_ex7_8:13562238-13562260:+_5-5	1700029H14Rik	14.7869	26.1657	27.3691	22.3653	1.76951	0.817172	0.565127	1.22373
GGGTGGCTTGCACCAGAAG	1700029H14Rik_CCDS40233.1_ex7_8:13562202-13562224:-_5-4	1700029H14Rik	5.75901	9.27879	7.72966	9.2735	1.61118	1.19973	0.620664	0.833522
CTACGCAAGGAGCTAGGTA	1700029H14Rik_CCDS40233.1_ex7_8:13562153-13562175:-_5-3	1700029H14Rik	6.82947	7.88253	6.63061	8.57611	1.15419	1.29341	0.866406	0.773149
GACCTCAAGTGTGCAAAAA	1700029H14Rik_CCDS40233.1_ex5_8:13558842-13558864:-_5-2	1700029H14Rik	10.2988	9.91107	5.67492	8.061	0.962354	1.42046	1.03912	0.703997
AGCAGGACGATGCCTGCAA	1700029H14Rik_CCDS40233.1_ex5_8:13558781-13558803:-_5-1	1700029H14Rik	9.03486	6.71678	6.04127	8.81386	0.743429	1.45894	1.34512	0.685429
CAGCCTCTCTCAGGCCTGG	1700029I15Rik_CCDS16445.1_ex1_2:92383256-92383278:+_5-3	1700029I15Rik	36.1445	20.8573	25.5931	9.77276	0.577052	0.381851	1.73294	2.61882
GAGGAATTTTCAGCCCCGC	1700029I15Rik_CCDS16445.1_ex1_2:92383226-92383248:+_5-2	1700029I15Rik	17.2503	20.4884	15.8291	13.1408	1.18772	0.830165	0.841953	1.20458
TACTACCCTACCATCCACC	1700029I15Rik_CCDS16445.1_ex1_2:92383271-92383293:-_5-4	1700029I15Rik	8.72533	12.2492	19.9227	18.3315	1.40386	0.920134	0.712322	1.0868
TCTCAGCAATCTGTTCCGG	1700029I15Rik_CCDS16445.1_ex1_2:92383208-92383230:+_5-1	1700029I15Rik	24.1373	21.9835	21.5075	22.6109	0.910768	1.0513	1.09797	0.951201
CTCTTCTCTCTTTAGACTA	1700029I15Rik_CCDS16445.1_ex2_2:92383432-92383454:+_5-5	1700029I15Rik	5.35276	5.49834	5.18911	6.2066	1.0272	1.19608	0.973522	0.836064
GGAATCAAAGTATCCTGCC	1700029J07Rik_CCDS22283.1_ex5_8:45970481-45970503:+_5-4	1700029J07Rik	10.9888	3.12074	9.58529	4.36804	0.283994	0.455703	3.5212	2.19441
CGTGAATTTGAATCAAGTG	1700029J07Rik_CCDS22283.1_ex5_8:45970428-45970450:-_5-3	1700029J07Rik	9.99569	4.10866	7.06864	4.62956	0.411043	0.654944	2.43283	1.52685
AATAGACAGATCCTACCGG	1700029J07Rik_CCDS22283.1_ex5_8:45970526-45970548:-_5-5	1700029J07Rik	18.972	12.1504	12.1736	9.21802	0.640435	0.757213	1.56144	1.32063
GGACAAGTATCAGCCACCG	1700029J07Rik_CCDS22283.1_ex4_8:45968071-45968093:-_5-1	1700029J07Rik	4.90136	8.19208	6.95714	6.16697	1.67139	0.886423	0.598305	1.12813
AAGCTTTCATCCCTAGTAG	1700029J07Rik_CCDS22283.1_ex5_8:45970366-45970388:-_5-2	1700029J07Rik	2.39288	3.27881	3.55647	4.13822	1.37023	1.16357	0.729802	0.859421
TACGACGACGACCCGAAGG	1700029P11Rik_CCDS37152.1_ex0_15:81980775-81980797:+_5-4	1700029P11Rik	1	1	1	1	1	1	1	1
CGGTCCGCTGCGGCCCGAA	1700029P11Rik_CCDS37152.1_ex0_15:81980667-81980689:+_5-2	1700029P11Rik	15.4511	20.0998	17.9476	23.3559	1.30086	1.30134	0.76872	0.76844
CGTCGTAACCATGGAAGTG	1700029P11Rik_CCDS37152.1_ex0_15:81980761-81980783:-_5-3	1700029P11Rik	5.97181	6.77606	3.72372	4.97825	1.13467	1.3369	0.881311	0.747997
CTCCAGGGCTGTGGTCGCC	1700029P11Rik_CCDS37152.1_ex0_15:81980648-81980670:+_5-1	1700029P11Rik	30.8244	31.4412	13.0815	21.24	1.02001	1.62366	0.980383	0.615893
AAGACGGCGTGCATATTCA	1700029P11Rik_CCDS37152.1_ex0_15:81980801-81980823:-_5-5	1700029P11Rik	1	1	1	2.2125	1	2.2125	1	0.451978
TGGGTAGCTTGACGTAGAC	1700030F18Rik_CCDS37207.1_ex1_15:99927824-99927846:+_5-2	1700030F18Rik	3.03773	1.00659	7.25181	5.66771	0.331361	0.781558	3.01786	1.2795
TATAGACAAGCTTCAGTGG	1700030F18Rik_CCDS37207.1_ex1_15:99927863-99927885:-_5-4	1700030F18Rik	2.92811	7.73105	9.73661	8.0293	2.64029	0.824651	0.378747	1.21263
GGCACCGATGAGTGCGCTC	1700030F18Rik_CCDS37207.1_ex1_15:99927792-99927814:-_5-1	1700030F18Rik	19.5137	17.7354	17.2627	15.9858	0.908869	0.926033	1.10027	1.07988
GACAGGTCAGCGTTCCACA	1700030F18Rik_CCDS37207.1_ex1_15:99927840-99927862:+_5-3	1700030F18Rik	7.93861	7.55981	6.90936	7.26852	0.952283	1.05198	1.05011	0.950586
ATACCCGAGTGTTTTGAAG	1700030F18Rik_CCDS37207.1_ex2_15:99929825-99929847:+_5-5	1700030F18Rik	3.57296	11.6432	9.43397	13.8937	3.2587	1.47273	0.306871	0.679013
TTTTCTCCATGCACGTCGG	1700030J22Rik_CCDS22695.1_ex0_8:116971845-116971867:+_5-3	1700030J22Rik	34.7838	21.8583	36.6871	32.3188	0.628405	0.880932	1.59133	1.13516
TCCGGACGAGAAAAGTGAA	1700030J22Rik_CCDS22695.1_ex1_8:116973548-116973570:-_5-5	1700030J22Rik	7.3518	9.30514	11.7117	11.2547	1.2657	0.960979	0.790079	1.04061
CAACCTCCAAGAGGGACCG	1700030J22Rik_CCDS22695.1_ex0_8:116971996-116972018:+_5-4	1700030J22Rik	16.2572	15.1536	8.68535	15.4548	0.932118	1.77942	1.07283	0.561982
TGCTAACTGTCTCGGGCAT	1700030J22Rik_CCDS22695.1_ex0_8:116971777-116971799:+_5-1	1700030J22Rik	24.9756	21.5159	19.0785	34.9499	0.861475	1.8319	1.1608	0.545882
TATCTGGTGCATGGAGGAG	1700030J22Rik_CCDS22695.1_ex0_8:116971800-116971822:-_5-2	1700030J22Rik	8.70599	8.2316	2.85563	7.75986	0.94551	2.71739	1.05763	0.368001
CCCGACAGGCGAGCAGTGC	1700030K09Rik_CCDS22414.1_ex1_8:72449558-72449580:+_5-5	1700030K09Rik	14.0905	10.7146	15.6699	11.9442	0.760411	0.762238	1.31508	1.31193
CCATACAGTCGACTCGCGT	1700030K09Rik_CCDS22414.1_ex1_8:72449522-72449544:+_5-4	1700030K09Rik	12.156	14.0603	17.9954	17.9591	1.15666	0.997983	0.864556	1.00202
GGCCGAGGAGACTTTAAGC	1700030K09Rik_CCDS22414.1_ex1_8:72449502-72449524:-_5-3	1700030K09Rik	3.66324	2.03403	2.60875	2.66421	0.555253	1.02126	1.80098	0.979183
GCCGAGTGGTAACGGTAGC	1700030K09Rik_CCDS22414.1_ex0_8:72445220-72445242:+_5-2	1700030K09Rik	23.0475	25.7047	18.1785	19.7818	1.11529	1.08819	0.896628	0.918954
AGACTCTGCTCGATGGATG	1700030K09Rik_CCDS22414.1_ex0_8:72445103-72445125:-_5-1	1700030K09Rik	15.8961	14.7651	10.0631	20.709	0.928848	2.05791	1.0766	0.485931
TGGGATTCCATGAGAAAGA	1700031F05Rik_CCDS53160.1_ex3_X:102864169-102864191:+_5-4	1700031F05Rik	2.5154	3.54226	3.42108	1.56266	1.40823	0.456774	0.710114	2.18927
TTCAGAGTCACCGGAATAC	1700031F05Rik_CCDS53160.1_ex3_X:102864204-102864226:+_5-5	1700031F05Rik	6.61667	7.53346	12.0303	5.83413	1.13856	0.484954	0.878303	2.06205
GCAGGGAATAGTCATGGGC	1700031F05Rik_CCDS53160.1_ex3_X:102864146-102864168:+_5-3	1700031F05Rik	8.38356	7.13171	15.3752	11.7223	0.850678	0.762414	1.17553	1.31162
CAGAATAACACGTTCAACC	1700031F05Rik_CCDS53160.1_ex1_X:102860896-102860918:-_5-1	1700031F05Rik	7.20993	2.96926	6.02534	5.76281	0.411829	0.956428	2.42819	1.04556
TTGACAGGGGCGGCAGTGC	1700031F05Rik_CCDS53160.1_ex2_X:102861157-102861179:+_5-2	1700031F05Rik	15.0707	18.6641	4.36881	10.906	1.23844	2.49633	0.807471	0.400588
CGCCTTAAACGAAGCTGCT	1700034E13Rik_CCDS29249.1_ex1_18:52663588-52663610:+_5-5	1700034E13Rik	15.032	7.93522	9.72068	9.18632	0.527889	0.945029	1.89434	1.05817
TGACAGAACTTACCAGTAA	1700034E13Rik_CCDS29249.1_ex0_18:52660563-52660585:-_5-4	1700034E13Rik	1	1	1.87605	2.40269	1	1.28072	1	0.780812
TCTGTTGCCTAAAGAACTA	1700034E13Rik_CCDS29249.1_ex0_18:52660509-52660531:+_5-2	1700034E13Rik	4.7337	8.20525	4.45642	6.49189	1.73337	1.45675	0.576911	0.686459
GCCACAGTGTCTGAAAAAG	1700034E13Rik_CCDS29249.1_ex0_18:52660473-52660495:+_5-1	1700034E13Rik	8.4416	5.281	8.23936	13.0695	0.625592	1.58622	1.59849	0.630428
CAGAAGTCAGAACCATTAC	1700034E13Rik_CCDS29249.1_ex0_18:52660550-52660572:+_5-3	1700034E13Rik	2.26391	2.19868	1.09557	2.16495	0.971186	1.97609	1.02967	0.506049
TTCCAGATTAACGGAGTCC	1700034F02Rik_CCDS48763.1_ex3_11:29560460-29560482:-_5-4	1700034F02Rik	7.86768	3.26564	10.7242	3.71028	0.41507	0.345974	2.40923	2.89039
TGGTGTAATATTCATCAGC	1700034F02Rik_CCDS48763.1_ex0_11:29553718-29553740:-_5-1	1700034F02Rik	6.50059	5.80131	5.60325	4.11445	0.892427	0.734297	1.12054	1.36185
ACATTCATACCGAAACTGC	1700034F02Rik_CCDS48763.1_ex3_11:29560640-29560662:-_5-5	1700034F02Rik	10.705	21.6344	11.417	16.6039	2.02096	1.45431	0.494815	0.68761
ACGATACTGCACCTGGGAT	1700034F02Rik_CCDS48763.1_ex2_11:29557777-29557799:-_5-3	1700034F02Rik	19.5782	32.686	25.9117	37.9137	1.66951	1.46319	0.598979	0.683438
TACCGAAACGTTTTCGACA	1700034F02Rik_CCDS48763.1_ex0_11:29553741-29553763:+_5-2	1700034F02Rik	1.81251	3.48298	4.48827	6.72963	1.92163	1.49938	0.520392	0.666942
CTTATCCATCCACTGGCTA	1700034J05Rik_CCDS51956.1_ex1_6:146953176-146953198:+_5-2	1700034J05Rik	12.5171	12.3809	16.315	10.375	0.989119	0.635922	1.011	1.57252
AGCAAGCTAAGCATCACAC	1700034J05Rik_CCDS51956.1_ex1_6:146953260-146953282:-_5-5	1700034J05Rik	6.01695	10.6026	4.71923	3.03667	1.76212	0.643468	0.567497	1.55408
GAGTCCACATCGATATCCC	1700034J05Rik_CCDS51956.1_ex1_6:146953237-146953259:+_5-4	1700034J05Rik	13.1168	10.2009	16.53	13.1567	0.777695	0.795926	1.28585	1.2564
AGGGGTAGTGCTGTTGAGG	1700034J05Rik_CCDS51956.1_ex1_6:146953017-146953039:+_5-1	1700034J05Rik	14.3484	17.3798	10.5489	10.5098	1.21126	0.996286	0.825584	1.00373
ATTAGCAAGAGAGTCTGCA	1700034J05Rik_CCDS51956.1_ex1_6:146953212-146953234:+_5-3	1700034J05Rik	5.13995	3.27222	9.11541	10.9298	0.636625	1.19904	1.57078	0.833998
CACTTTGAGGCTTCATCAG	1700034O15Rik_CCDS20054.1_ex1_6:41685240-41685262:+_5-5	1700034O15Rik	19.2364	20.0406	23.0844	21.4698	1.0418	0.930054	0.959875	1.07521
TAGTGAGTGCAAGCTTGGA	1700034O15Rik_CCDS20054.1_ex0_6:41684611-41684633:+_5-1	1700034O15Rik	9.91186	9.46321	11.1383	10.5652	0.954735	0.948551	1.04741	1.05424
CTCCTCTACCCACCTTCAG	1700034O15Rik_CCDS20054.1_ex0_6:41684660-41684682:-_5-3	1700034O15Rik	21.4612	14.5806	22.1048	29.458	0.679397	1.33265	1.47189	0.750386
AAGACAAAGTGTCCTCTGA	1700034O15Rik_CCDS20054.1_ex0_6:41684647-41684669:+_5-2	1700034O15Rik	4.10174	3.17343	2.79989	4.34427	0.773679	1.55159	1.29253	0.644501
TCTTTTATGTTGTAGACCA	1700034O15Rik_CCDS20054.1_ex1_6:41685199-41685221:+_5-4	1700034O15Rik	2.64437	10.7014	6.98103	12.1502	4.04686	1.74046	0.247105	0.574561
CTTCCGACTGCGACACCTC	1700037C18Rik_CCDS49746.1_ex1_16:3907052-3907074:-_5-5	1700037C18Rik	19.8877	18.6048	30.3079	28.2296	0.935491	0.931429	1.06896	1.07362
GGGACAGCCTGGGAAATAC	1700037C18Rik_CCDS49746.1_ex1_16:3906840-3906862:-_5-1	1700037C18Rik	5.18509	2.98243	2.36982	2.53741	0.575194	1.07072	1.73855	0.933953
GGCTAGGCCGGCTCATGGC	1700037C18Rik_CCDS49746.1_ex1_16:3906972-3906994:-_5-3	1700037C18Rik	31.5596	23.0109	23.0685	26.193	0.729127	1.13544	1.3715	0.880714
TTGGCCAGCAGGCTGCATG	1700037C18Rik_CCDS49746.1_ex1_16:3907006-3907028:+_5-4	1700037C18Rik	20.6487	15.4764	16.2273	22.9042	0.749509	1.41145	1.33421	0.708489
GCAGCCTGACACGGCCTGA	1700037C18Rik_CCDS49746.1_ex1_16:3906948-3906970:-_5-2	1700037C18Rik	14.2324	9.43686	9.6729	20.0512	0.663056	2.07293	1.50817	0.482409
GGTAATCTCATACCTGTGC	1700037H04Rik_CCDS16756.1_ex2_2:131148255-131148277:+_5-2	1700037H04Rik	20.0425	9.66079	15.2079	12.6732	0.482015	0.83333	2.07462	1.2
ATGCAGCTTTTCATCAAAG	1700037H04Rik_CCDS16756.1_ex3_2:131151668-131151690:+_5-4	1700037H04Rik	2.63148	1.39517	3.22995	2.71968	0.530185	0.842021	1.88613	1.18762
TCGGTGGTCATGGTTACTC	1700037H04Rik_CCDS16756.1_ex3_2:131151644-131151666:-_5-3	1700037H04Rik	10.776	5.18879	10.3419	13.9412	0.481515	1.34803	2.07678	0.741821
ATCAAAGTGGACGTGGCTC	1700037H04Rik_CCDS16756.1_ex3_2:131151680-131151702:+_5-5	1700037H04Rik	11.5369	14.7914	9.99943	14.1631	1.2821	1.41639	0.779973	0.70602
AGTACTCGGCACACAAAGA	1700037H04Rik_CCDS16756.1_ex1_2:131147244-131147266:-_5-1	1700037H04Rik	5.7977	3.74643	7.45092	11.3022	0.646191	1.51689	1.54753	0.659242
CCCCCCTACAGATTATGGA	1700039E15Rik_CCDS21238.1_ex2_7:45286870-45286892:+_5-3	1700039E15Rik	14.9095	9.3249	12.1657	8.71084	0.625435	0.716018	1.59889	1.39661
AGCATCCCAATCTGGTACA	1700039E15Rik_CCDS21238.1_ex2_7:45287062-45287084:+_5-5	1700039E15Rik	10.0602	7.2766	8.66942	8.94065	0.723308	1.03129	1.38254	0.969663
AGGCCACATACGACAGGCC	1700039E15Rik_CCDS21238.1_ex2_7:45286894-45286916:-_5-4	1700039E15Rik	12.0012	15.3249	12.4603	14.805	1.27695	1.18817	0.783118	0.841629
GATCAACCTGATAGCCAAC	1700039E15Rik_CCDS21238.1_ex1_7:45286456-45286478:+_5-1	1700039E15Rik	13.033	15.0614	17.2149	20.495	1.15564	1.19054	0.865319	0.839955
TCCAGGCTAGGTATTCCAG	1700039E15Rik_CCDS21238.1_ex1_7:45286527-45286549:-_5-2	1700039E15Rik	8.73178	11.7947	10.1269	13.2597	1.35078	1.30936	0.740314	0.763733
AGGTCAATGATCTGGTCAG	1700040L02Rik_CCDS23905.1_ex6_10:68533844-68533866:+_5-5	1700040L02Rik	6.84881	3.47639	11.3613	9.42407	0.507591	0.82949	1.97009	1.20556
TGAAGTAGCATGTCCAGCA	1700040L02Rik_CCDS23905.1_ex5_10:68525608-68525630:+_5-3	1700040L02Rik	14.1872	3.44346	13.0497	11.223	0.242716	0.860021	4.12005	1.16276
AGACACATAGTAGTCCAAG	1700040L02Rik_CCDS23905.1_ex5_10:68525688-68525710:+_5-4	1700040L02Rik	1	1	1	1	1	1	1	1
GACAGCATTAAGTGGCTCG	1700040L02Rik_CCDS23905.1_ex4_10:68516369-68516391:-_5-2	1700040L02Rik	18.9011	8.06694	13.5514	14.8288	0.426797	1.09426	2.34303	0.913859
CTCGTAGAGCCTGTAGTGC	1700040L02Rik_CCDS23905.1_ex3_10:68509741-68509763:+_5-1	1700040L02Rik	9.53785	10.0033	10.9392	20.2177	1.0488	1.84819	0.953473	0.541071
CCATTCCTTTGTATATTCG	1700042B14Rik_CCDS53232.1_ex0_X:155125577-155125599:-_2-1	1700042B14Rik	4.92715	8.06694	3.78743	2.054	1.63724	0.54232	0.610783	1.84393
GTGGTCCTCAAGCCTACAG	1700042B14Rik_CCDS53232.1_ex0_X:155125689-155125711:-_2-2	1700042B14Rik	8.91234	17.2415	15.1681	11.3022	1.93456	0.745132	0.516914	1.34204
CATACCGGCAGAAACCCCG	1700042G07Rik_CCDS51276.1_ex0_4:116173521-116173543:+_5-3	1700042G07Rik	10.7695	6.98681	16.6176	4.77221	0.648758	0.287178	1.54141	3.48216
TATGTTCAAGTGTAGCCGC	1700042G07Rik_CCDS51276.1_ex0_4:116173498-116173520:+_5-2	1700042G07Rik	25.498	14.8441	18.3777	11.8332	0.582168	0.643891	1.71772	1.55306
TGGTGGCAGTTGGGCCTCG	1700042G07Rik_CCDS51276.1_ex0_4:116173536-116173558:-_5-4	1700042G07Rik	34.6871	17.551	16.53	11.8094	0.505981	0.714425	1.97636	1.39973
ATACTGGGACACCGGCGCC	1700042G07Rik_CCDS51276.1_ex0_4:116173480-116173502:-_5-1	1700042G07Rik	9.97635	11.5839	14.9053	11.7777	1.16114	0.790171	0.861222	1.26555
GCCACAAACATCAGTGACA	1700042G07Rik_CCDS51276.1_ex0_4:116173571-116173593:+_5-5	1700042G07Rik	2.754	4.03622	2.25036	5.72318	1.46558	2.54323	0.682322	0.393201
GACTACAGGGTTATAAAGG	1700049G17Rik_CCDS21032.1_ex0_7:27912087-27912109:-_4-1	1700049G17Rik	1	1	2.31408	1	1	0.432138	1	2.31408
ACAACCATAGTATATTCAG	1700049G17Rik_CCDS21032.1_ex0_7:27912108-27912130:-_4-2	1700049G17Rik	1	1	1.74862	1	1	0.571878	1	1.74862
GTAGAATTCTTGATCTCGA	1700049G17Rik_CCDS21032.1_ex0_7:27912150-27912172:-_4-3	1700049G17Rik	8.95103	4.24697	13.7744	9.36067	0.474467	0.67957	2.10763	1.47152
CAGAAAATTCTATTAGTAA	1700049G17Rik_CCDS21032.1_ex0_7:27912204-27912226:-_4-4	1700049G17Rik	1.00645	3.22612	3.02288	3.96388	3.20545	1.31129	0.311969	0.762607
TCATGAAGCCATCATGCAG	1700052N19Rik_CCDS56676.1_ex2_10:4439715-4439737:+_5-3	1700052N19Rik	7.88703	7.22391	9.95961	2.33137	0.915924	0.234082	1.09179	4.272
CTTAAACACGTCGAAGTCA	1700052N19Rik_CCDS56676.1_ex3_10:4450656-4450678:-_5-4	1700052N19Rik	13.0845	7.86936	6.84564	4.899	0.601424	0.715638	1.66272	1.39735
CCTTTTAAATGAAGGCGAT	1700052N19Rik_CCDS56676.1_ex2_10:4439634-4439656:+_5-2	1700052N19Rik	1	3.27222	4.16175	3.108	3.27222	0.746802	0.305603	1.33904
GAGAACTTCTTCGAGTCGC	1700052N19Rik_CCDS56676.1_ex3_10:4450689-4450711:+_5-5	1700052N19Rik	9.66682	16.214	12.4763	18.4663	1.67729	1.48011	0.596201	0.675624
CACATATGGAATCAATACC	1700052N19Rik_CCDS56676.1_ex2_10:4439599-4439621:+_5-1	1700052N19Rik	2.88942	1	3.38126	5.62016	0.34609	1.66215	2.88942	0.601631
GAAGTTGTGGACCCTATGC	1700054O13Rik_CCDS30012.1_ex0_X:9847161-9847183:-_5-3	1700054O13Rik	8.08693	6.33478	11.3374	5.16052	0.783336	0.455177	1.27659	2.19695
GTGTACCGTATACTGCAGG	1700054O13Rik_CCDS30012.1_ex0_X:9847126-9847148:+_5-1	1700054O13Rik	17.8242	6.30185	18.6325	9.0199	0.353556	0.484095	2.82841	2.06571
CTCCAGGATGTAGTCGGTG	1700054O13Rik_CCDS30012.1_ex0_X:9847210-9847232:-_5-5	1700054O13Rik	18.5916	13.3029	13.9735	8.77423	0.715535	0.627919	1.39755	1.59256
GCAATATACCCCCTGCATA	1700054O13Rik_CCDS30012.1_ex0_X:9847149-9847171:+_5-2	1700054O13Rik	15.3867	7.59274	20.7111	20.4158	0.493462	0.985739	2.0265	1.01447
GTAATCAAGCATGGCAAGA	1700054O13Rik_CCDS30012.1_ex0_X:9847189-9847211:-_5-4	1700054O13Rik	6.93909	17.2876	16.4185	19.758	2.49133	1.2034	0.401392	0.830979
GAAGGAGGCCTTCAACACA	1700055N04Rik_CCDS57128.1_ex1_19:3963871-3963893:+_5-1	1700055N04Rik	5.68163	1	9.20302	2.1174	0.176006	0.230076	5.68163	4.34638
ACAAAGACGGCTAAGTTCA	1700055N04Rik_CCDS57128.1_ex1_19:3963896-3963918:+_5-2	1700055N04Rik	6.61022	8.22501	8.37475	4.64541	1.24429	0.554692	0.803673	1.8028
AAACAGCTTCATGACGCCC	1700055N04Rik_CCDS57128.1_ex1_19:3963962-3963984:+_5-3	1700055N04Rik	9.60233	14.1855	14.2921	11.2943	1.47729	0.790251	0.676913	1.26542
GATGATCATACCTTTAGTG	1700055N04Rik_CCDS57128.1_ex3_19:3964902-3964924:+_5-4	1700055N04Rik	5.99761	9.66079	9.50565	7.97383	1.61077	0.838851	0.62082	1.19211
TGACGATCTTGCCTACCCG	1700055N04Rik_CCDS57128.1_ex6_19:3965638-3965660:-_5-5	1700055N04Rik	14.1679	15.0746	13.4957	22.5158	1.064	1.66838	0.939851	0.599385
GCGCTCCTTGGCTCGCCGA	1700056E22Rik_CCDS56665.1_ex0_1:184033425-184033447:+_5-1	1700056E22Rik	18.6948	17.0505	18.9272	16.493	0.912045	0.871392	1.09644	1.14759
ACTCCGGAGAGCTACTCGG	1700056E22Rik_CCDS56665.1_ex0_1:184033695-184033717:-_5-4	1700056E22Rik	20.4488	19.6783	25.8161	24.6476	0.962324	0.954738	1.03915	1.04741
GACCGCGTTGGGAGGAGGT	1700056E22Rik_CCDS56665.1_ex0_1:184033548-184033570:+_5-3	1700056E22Rik	8.04824	6.69702	9.6729	9.89956	0.83211	1.02343	1.20176	0.977104
GGGCTCCAAAACATCGCAC	1700056E22Rik_CCDS56665.1_ex0_1:184033501-184033523:+_5-2	1700056E22Rik	12.6138	15.6213	12.4683	15.1775	1.23843	1.21729	0.807476	0.8215
CGCCTTCGGGATCGGAGTC	1700056E22Rik_CCDS56665.1_ex0_1:184033718-184033740:+_5-5	1700056E22Rik	12.6331	14.877	15.415	20.2256	1.17762	1.31207	0.849171	0.762154
TTTGAATAACATAACCCAC	1700057G04Rik_CCDS23406.1_ex3_9:92352562-92352584:-_5-3	1700057G04Rik	4.39192	3.1405	5.08558	2.71968	0.715062	0.534783	1.39848	1.86992
AACAACAATCACATCGTAG	1700057G04Rik_CCDS23406.1_ex2_9:92351102-92351124:-_5-2	1700057G04Rik	4.52734	3.1866	6.93325	5.69148	0.703857	0.820897	1.42074	1.21818
CAATCTGCGTGTGCAACAT	1700057G04Rik_CCDS23406.1_ex3_9:92352655-92352677:+_5-5	1700057G04Rik	1	1	1	1	1	1	1	1
CATTAGACCTTTCACCATG	1700057G04Rik_CCDS23406.1_ex2_9:92351037-92351059:+_5-1	1700057G04Rik	24.3243	35.5773	31.9007	31.9067	1.46262	1.00019	0.683703	0.99981
CTGTAAACTTTGGCCGACA	1700057G04Rik_CCDS23406.1_ex3_9:92352592-92352614:-_5-4	1700057G04Rik	13.5101	14.5938	8.25529	21.0022	1.08021	2.54409	0.925744	0.393068
TATATAACCAGGGTACCAC	1700061G19Rik_CCDS37666.1_ex5_17:56882634-56882656:+_5-5	1700061G19Rik	8.79627	3.40395	6.84564	4.18577	0.386976	0.61145	2.58414	1.63546
GCCGCGCTCATGATCAAGT	1700061G19Rik_CCDS37666.1_ex1_17:56877453-56877475:-_5-2	1700061G19Rik	26.1879	13.6257	27.4567	17.1587	0.520303	0.624935	1.92196	1.60017
CGCTTAGATGTCCAGTAGC	1700061G19Rik_CCDS37666.1_ex1_17:56877366-56877388:-_5-1	1700061G19Rik	7.17124	2.9495	9.872	9.66181	0.411296	0.978709	2.43134	1.02175
GTACTTGGAACCGATCGCC	1700061G19Rik_CCDS37666.1_ex1_17:56877493-56877515:-_5-3	1700061G19Rik	28.5546	17.36	17.0158	18.4108	0.607959	1.08198	1.64485	0.924229
ACCTACATCGAGTACTACG	1700061G19Rik_CCDS37666.1_ex1_17:56877535-56877557:+_5-4	1700061G19Rik	5.28827	8.989	7.53852	9.2735	1.6998	1.23015	0.588304	0.81291
GGGCCAGCATAGATCCCAC	1700065I17Rik_CCDS29260.1_ex2_18:56594458-56594480:-_5-4	1700065I17Rik	11.8206	4.68166	13.8381	4.41559	0.396058	0.319089	2.52488	3.13392
AGGCATGACGTAACGGGTC	1700065I17Rik_CCDS29260.1_ex1_18:56592425-56592447:-_5-3	1700065I17Rik	8.73178	11.9396	14.8735	7.82326	1.36737	0.525988	0.73133	1.90118
CCCGGTTCTCACTAAAGCA	1700065I17Rik_CCDS29260.1_ex1_18:56592396-56592418:+_5-2	1700065I17Rik	2.70241	21.2063	14.6584	17.9749	7.84718	1.22625	0.127434	0.815492
AGCGAGAGGCTTTGCCATG	1700065I17Rik_CCDS29260.1_ex2_18:56594507-56594529:+_5-5	1700065I17Rik	17.7468	14.5016	17.6051	22.4287	0.817139	1.27398	1.22378	0.784939
GGACGATATTCACTTGCCC	1700065I17Rik_CCDS29260.1_ex1_18:56592379-56592401:+_5-1	1700065I17Rik	5.8235	7.71129	10.987	15.8352	1.32417	1.44127	0.755191	0.693831
CGGCGTTTACCTCATCCAC	1700066B19Rik_CCDS50252.1_ex1_18:35728709-35728731:+_5-5	1700066B19Rik	7.326	4.07573	10.1906	3.67066	0.556338	0.360202	1.79747	2.77622
AGGACAAAGGCCGCGATGA	1700066B19Rik_CCDS50252.1_ex1_18:35728589-35728611:-_5-2	1700066B19Rik	4.06305	4.18111	7.78541	2.92573	1.02906	0.375796	0.971763	2.66102
TTGGGCCTGCACTGCATCA	1700066B19Rik_CCDS50252.1_ex1_18:35728642-35728664:+_5-4	1700066B19Rik	6.0234	7.4215	8.14379	7.28437	1.23211	0.894469	0.811615	1.11798
GCGATCTGCATTGTGCTGG	1700066B19Rik_CCDS50252.1_ex1_18:35728614-35728636:+_5-3	1700066B19Rik	35.6931	36.8748	37.6189	41.9633	1.03311	1.11548	0.967954	0.896471
GCCCCCTCGAGGTGGCGAC	1700066B19Rik_CCDS50252.1_ex1_18:35728550-35728572:+_5-1	1700066B19Rik	22.2414	18.2557	13.4877	25.1944	0.820797	1.86796	1.21833	0.535344
CTTTTAACCTGACTCAGAA	1700066M21Rik_CCDS48264.1_ex1_1:57382989-57383011:+_5-5	1700066M21Rik	2.80559	6.72337	4.90241	2.06192	2.39642	0.420594	0.417289	2.37759
CGTTACCTGCACGTCCCCA	1700066M21Rik_CCDS48264.1_ex0_1:57377931-57377953:-_5-2	1700066M21Rik	14.5613	15.4764	17.6848	19.4648	1.06285	1.10065	0.94087	0.908552
GCAGTTCGTTGCTGCGCTG	1700066M21Rik_CCDS48264.1_ex0_1:57377851-57377873:-_5-1	1700066M21Rik	20.9582	26.8638	18.3856	24.7348	1.28178	1.34533	0.780164	0.74331
GCTTAAAGGCTCCAAAGTC	1700066M21Rik_CCDS48264.1_ex1_1:57382944-57382966:-_5-4	1700066M21Rik	4.21781	5.44565	4.42456	6.0798	1.29111	1.3741	0.774529	0.727748
TAACTATTGGGAAAACGGC	1700066M21Rik_CCDS48264.1_ex1_1:57382825-57382847:-_5-3	1700066M21Rik	7.75806	18.0581	3.65204	6.61076	2.32766	1.81015	0.429615	0.552439
TTTGGGTTCGTGGACCTGG	1700067K01Rik_CCDS22464.2_ex2_8:84003178-84003200:+_5-2	1700067K01Rik	12.4074	7.45443	13.6788	9.0516	0.600803	0.661723	1.66444	1.51121
AACCTCCCGCAGAAAAAGC	1700067K01Rik_CCDS22464.2_ex3_8:84003301-84003323:-_5-3	1700067K01Rik	9.91186	13.9286	12.0542	8.11647	1.40525	0.673334	0.711619	1.48515
GACTGGCAGTATAGGCAGC	1700067K01Rik_CCDS22464.2_ex3_8:84003369-84003391:-_5-5	1700067K01Rik	14.974	19.0987	16.2114	11.9283	1.27546	0.735797	0.784028	1.35907
TCGGAAGATGGACACGTCG	1700067K01Rik_CCDS22464.2_ex3_8:84003338-84003360:-_5-4	1700067K01Rik	6.44256	13.0724	15.8929	13.3468	2.02907	0.839802	0.492836	1.19076
CAAGCGCAGTGTTAGCTGC	1700067K01Rik_CCDS22464.2_ex2_8:84003130-84003152:-_5-1	1700067K01Rik	11.7368	7.13829	3.15827	14.6465	0.608198	4.63751	1.6442	0.215633
CCCTCTTCTAGTCTCTCGG	1700067P10Rik_CCDS28857.1_ex1_17:48090405-48090427:+_5-2	1700067P10Rik	23.0604	22.3787	27.3532	21.1686	0.970436	0.7739	1.03046	1.29216
GTCCAGCTTGCCATCAGAG	1700067P10Rik_CCDS28857.1_ex1_17:48090429-48090451:+_5-3	1700067P10Rik	5.06902	5.28759	14.8894	12.0947	1.04312	0.812306	0.958664	1.23106
ACCTTTGAAGCTTGCTCCG	1700067P10Rik_CCDS28857.1_ex1_17:48090324-48090346:-_5-1	1700067P10Rik	12.7686	4.79362	12.2134	11.0645	0.375424	0.905928	2.66365	1.10384
CACGCTCATAGGCACCAGC	1700067P10Rik_CCDS28857.1_ex1_17:48090568-48090590:-_5-5	1700067P10Rik	13.0716	8.48187	14.3478	18.6644	0.648876	1.30085	1.54113	0.768727
TCTCCGAAGGAAAAAGCTG	1700067P10Rik_CCDS28857.1_ex1_17:48090502-48090524:+_5-4	1700067P10Rik	2.57344	3.19978	4.33696	11.5796	1.24338	2.66999	0.804257	0.374534
CCAACACAAGGCTCTGGGC	1700074P13Rik_CCDS20041.1_ex3_6:40928562-40928584:+_5-5	1700074P13Rik	11.9045	7.14488	9.68086	10.4384	0.600185	1.07826	1.66615	0.927424
AGGATTCATTAAATGCCAT	1700074P13Rik_CCDS20041.1_ex2_6:40926015-40926037:+_5-1	1700074P13Rik	6.09434	9.61469	6.63061	7.72023	1.57764	1.16433	0.633857	0.858862
CATACATGTTGATAGTAGC	1700074P13Rik_CCDS20041.1_ex2_6:40926063-40926085:+_5-3	1700074P13Rik	2.77979	1	3.16623	4.91485	0.359739	1.55227	2.77979	0.644217
GGAACTATAGCCATAGCTA	1700074P13Rik_CCDS20041.1_ex2_6:40926040-40926062:-_5-2	1700074P13Rik	7.41628	7.41491	5.7466	8.97235	0.999815	1.56133	1.00018	0.640479
CAAGAACTAAAATCCGACT	1700074P13Rik_CCDS20041.1_ex2_6:40926210-40926232:-_5-4	1700074P13Rik	1	1	2.34593	8.03723	1	3.42603	1	0.291883
AGGGAGCTTCGGTAGTCGG	1700080E11Rik_CCDS23463.1_ex1_9:105144546-105144568:+_5-4	1700080E11Rik	34.1777	27.9901	30.8096	24.4099	0.818957	0.792281	1.22106	1.26218
CTAACACTAGAGCAGCTCC	1700080E11Rik_CCDS23463.1_ex1_9:105144479-105144501:-_5-1	1700080E11Rik	24.8853	14.5741	17.7485	16.6753	0.585648	0.939532	1.70751	1.06436
AGGCATTTGACATAGAAAT	1700080E11Rik_CCDS23463.1_ex1_9:105144498-105144520:+_5-2	1700080E11Rik	10.2278	2.72557	5.71474	6.19075	0.266486	1.08329	3.75255	0.92311
TTTGATTTGGACTCAGCGA	1700080E11Rik_CCDS23463.1_ex1_9:105144528-105144550:+_5-3	1700080E11Rik	16.6506	8.26453	10.9949	15.0507	0.496351	1.36887	2.0147	0.730528
GATCGTCCACAAAACCACC	1700080E11Rik_CCDS23463.1_ex1_9:105144649-105144671:+_5-5	1700080E11Rik	8.70599	5.37979	3.14234	6.68209	0.617942	2.12647	1.61828	0.470264
ATGTACTGGGTTCATCCCA	1700080O16Rik_CCDS53068.1_ex0_X:51969680-51969702:-_5-5	1700080O16Rik	20.4939	17.1888	15.4309	8.75046	0.838726	0.567072	1.19228	1.76344
TCAGATGCCTTAGTAAAGA	1700080O16Rik_CCDS53068.1_ex0_X:51969436-51969458:+_5-3	1700080O16Rik	5.57201	3.35784	5.06965	3.92425	0.602627	0.774068	1.6594	1.29188
CTCTCTTGTCAATGCCCTC	1700080O16Rik_CCDS53068.1_ex0_X:51969355-51969377:-_5-2	1700080O16Rik	16.9085	27.2195	25.617	28.4436	1.60981	1.11034	0.621192	0.900625
ATTGAGTATCTGCTGCCTA	1700080O16Rik_CCDS53068.1_ex0_X:51969573-51969595:+_5-4	1700080O16Rik	20.7196	13.5269	17.8759	23.1261	0.652854	1.2937	1.53174	0.772977
TTCGAGGCGTACCAAAGAT	1700080O16Rik_CCDS53068.1_ex0_X:51969305-51969327:-_5-1	1700080O16Rik	9.27991	13.5993	3.33348	4.94655	1.46546	1.4839	0.682381	0.673899
GGTCATGTAAAGAGGGCAC	1700084C01Rik_CCDS15466.1_ex2_1:169933685-169933707:-_5-3	1700084C01Rik	18.0112	4.25356	10.8994	4.28087	0.236162	0.392763	4.23439	2.54606
TTACCTAATTTTAGGCTCC	1700084C01Rik_CCDS15466.1_ex1_1:169933098-169933120:-_5-2	1700084C01Rik	8.77047	2.72557	6.1687	3.08422	0.310767	0.49998	3.21785	2.00008
TAGCGATTTCACGTGATAG	1700084C01Rik_CCDS15466.1_ex0_1:169930090-169930112:-_5-1	1700084C01Rik	1	1	3.93079	3.71821	1	0.94592	1	1.05717
TCAGGGTGTCTTTGAGGAC	1700084C01Rik_CCDS15466.1_ex2_1:169933706-169933728:-_5-4	1700084C01Rik	17.4051	15.1668	8.46236	9.55879	0.871403	1.12957	1.14757	0.885296
ACGAATCCACTGAAGGGCG	1700084C01Rik_CCDS15466.1_ex2_1:169933810-169933832:+_5-5	1700084C01Rik	14.6515	19.3359	10.6366	13.0695	1.31972	1.22873	0.757739	0.813847
CAGCTTGTGCCAAGCCAAT	1700088E04Rik_CCDS27633.1_ex3_15:79136344-79136366:-_5-3	1700088E04Rik	7.89992	7.32271	8.90038	5.55676	0.926934	0.624329	1.07883	1.60172
TCACGACTGTACGCCCCAT	1700088E04Rik_CCDS27633.1_ex3_15:79136329-79136351:+_5-2	1700088E04Rik	27.8194	16.8265	22.4473	15.4786	0.604848	0.689554	1.65331	1.45021
TTCCAGCAACGCCACATCA	1700088E04Rik_CCDS27633.1_ex4_15:79139250-79139272:-_5-4	1700088E04Rik	19.3461	18.8551	30.276	23.9819	0.97462	0.79211	1.02604	1.26245
CCAAAATATCTTTGCCACT	1700088E04Rik_CCDS27633.1_ex2_15:79135716-79135738:-_5-1	1700088E04Rik	15.2641	25.4807	17.4379	19.4014	1.66932	1.1126	0.599046	0.898796
TATTTTGCAGTTATGATGA	1700088E04Rik_CCDS27633.1_ex4_15:79139289-79139311:-_5-5	1700088E04Rik	11.6014	14.2052	13.7903	17.6421	1.22444	1.27931	0.816697	0.781672
GCAACGAAGTGGACAACTC	1700092M07Rik_CCDS50382.1_ex1_19:8740974-8740996:+_5-1	1700092M07Rik	1.0129	4.6158	5.16522	2.14117	4.55703	0.414536	0.219441	2.41233
GATAGCCTGCGCCACAGCA	1700092M07Rik_CCDS50382.1_ex1_19:8741035-8741057:-_5-3	1700092M07Rik	7.05517	3.39077	7.01289	4.36804	0.480609	0.622859	2.0807	1.6055
GTTAGATCTTTGTTTACGG	1700092M07Rik_CCDS50382.1_ex1_19:8740997-8741019:-_5-2	1700092M07Rik	5.24958	2.87047	1.36635	1	0.5468	0.731878	1.82882	1.36635
CTATCCATGTTCAGCCGTC	1700092M07Rik_CCDS50382.1_ex1_19:8741051-8741073:+_5-4	1700092M07Rik	46.6298	41.4324	57.3699	52.2973	0.88854	0.911581	1.12544	1.097
TGACCGCGAGGACTCCCGA	1700092M07Rik_CCDS50382.1_ex1_19:8741066-8741088:-_5-5	1700092M07Rik	10.5245	8.0867	10.4693	10.9536	0.768371	1.04625	1.30145	0.955791
ATTTGTATCCTCCTCTTAC	1700093K21Rik_CCDS24477.1_ex3_11:23518800-23518822:-_5-5	1700093K21Rik	4.55959	1	4.86259	1.53889	0.219318	0.316475	4.55959	3.15981
ATGTTGTCTCCTAAGGATG	1700093K21Rik_CCDS24477.1_ex1_11:23517278-23517300:+_5-1	1700093K21Rik	5.71387	7.68495	7.93673	3.44084	1.34496	0.433534	0.743515	2.30662
TAGAAAAATTGCCAGTAAG	1700093K21Rik_CCDS24477.1_ex3_11:23518788-23518810:+_5-4	1700093K21Rik	5.17865	8.39625	3.87504	2.55326	1.62132	0.6589	0.616781	1.51768
AGACCCTCTGTACAGGCGA	1700093K21Rik_CCDS24477.1_ex2_11:23518089-23518111:-_5-3	1700093K21Rik	20.797	16.9648	26.7161	20.1701	0.815736	0.754981	1.22589	1.32454
GCTTTTGCACAAGAATGCT	1700093K21Rik_CCDS24477.1_ex1_11:23517318-23517340:+_5-2	1700093K21Rik	11.3047	11.6564	16.2512	12.8793	1.03111	0.792511	0.969832	1.26181
ACTTAAGAAGACTGTCGAC	1700094D03Rik_CCDS50968.1_ex1_3:90063228-90063250:+_5-1	1700094D03Rik	1	1	1	1	1	1	1	1
TTTTCATATTCACTGTATG	1700094D03Rik_CCDS50968.1_ex2_3:90064433-90064455:+_5-2	1700094D03Rik	1	1	4.7272	6.11942	1	1.29451	1	0.77249
TAAGGCAGCTTGACGGACC	1700094D03Rik_CCDS50968.1_ex3_3:90065506-90065528:-_5-5	1700094D03Rik	8.49964	12.0384	8.67739	11.754	1.41634	1.35455	0.706044	0.738252
GCAGACAACATTGGACCAA	1700094D03Rik_CCDS50968.1_ex2_3:90064454-90064476:+_5-3	1700094D03Rik	5.23668	7.6125	3.75558	5.63601	1.45369	1.5007	0.687906	0.666354
AAACCTATTTGCTGCCCTA	1700094D03Rik_CCDS50968.1_ex2_3:90064478-90064500:+_5-4	1700094D03Rik	10.402	9.48955	5.8342	11.6192	0.912286	1.99157	1.09615	0.502116
TACGGGCATGGAGAACGAA	1700101E01Rik_CCDS50551.1_ex5_2:29054862-29054884:-_5-3	1700101E01Rik	1	3.19978	6.19259	2.18872	3.19978	0.353442	0.312522	2.82932
ATGAGCGGGTTCTGAAACA	1700101E01Rik_CCDS50551.1_ex5_2:29054820-29054842:+_5-2	1700101E01Rik	11.0661	18.8353	16.6654	9.93126	1.70206	0.595922	0.587522	1.67807
CGCTCACCTTGACGATGAG	1700101E01Rik_CCDS50551.1_ex5_2:29054806-29054828:+_5-1	1700101E01Rik	12.53	9.38417	20.2731	14.7099	0.748939	0.725588	1.33522	1.37819
GACCACCGTCAGCGGCCGT	1700101E01Rik_CCDS50551.1_ex5_2:29054891-29054913:+_5-5	1700101E01Rik	32.8493	36.8814	36.6314	37.1688	1.12275	1.01467	0.890674	0.98554
CGGTGGTCGACATCCGTAC	1700101E01Rik_CCDS50551.1_ex5_2:29054878-29054900:-_5-4	1700101E01Rik	7.73226	13.2568	10.0711	13.5212	1.71448	1.34257	0.583266	0.744838
CACCTCCCAGCCGGTACAC	1700102P08Rik_CCDS23524.1_ex0_9:108393357-108393379:+_5-1	1700102P08Rik	28.2708	32.4357	32.8086	20.812	1.14732	0.634346	0.871595	1.57643
ATCCGAACTATTGAAGAAT	1700102P08Rik_CCDS23524.1_ex2_9:108397203-108397225:+_5-5	1700102P08Rik	2.43157	1	2.92731	2.12532	0.411256	0.726032	2.43157	1.37735
GCAGCCTCTATACCCCAAA	1700102P08Rik_CCDS23524.1_ex0_9:108393504-108393526:+_5-3	1700102P08Rik	13.9422	8.62677	7.03678	5.49336	0.618752	0.780664	1.61616	1.28096
ATGGTGTGTCCCGAAGGCC	1700102P08Rik_CCDS23524.1_ex0_9:108393460-108393482:-_5-2	1700102P08Rik	6.58442	12.5455	11.6958	11.9362	1.90533	1.02056	0.524842	0.979855
CTGGACCGCAGGAAGGATA	1700102P08Rik_CCDS23524.1_ex1_9:108395282-108395304:+_5-4	1700102P08Rik	6.86171	7.38857	3.42108	4.09067	1.07678	1.19572	0.928693	0.836313
GAAGGCGTCCTCCAAGTAA	1700106J16Rik_CCDS48881.1_ex0_11:88294314-88294336:-_5-4	1700106J16Rik	8.8801	15.3051	8.16768	3.71028	1.72353	0.454264	0.580204	2.20136
GGAGGGCCATGACTGAGAC	1700106J16Rik_CCDS48881.1_ex0_11:88294194-88294216:-_5-1	1700106J16Rik	16.728	15.3315	18.5051	9.87578	0.916518	0.53368	1.09109	1.87378
GAAGGTGGCCGGGGTACAA	1700106J16Rik_CCDS48881.1_ex0_11:88294253-88294275:+_5-3	1700106J16Rik	20.5777	6.67068	15.2796	10.272	0.32417	0.672269	3.0848	1.4875
TCTCCAAGTCGGCCGGCAG	1700106J16Rik_CCDS48881.1_ex0_11:88294222-88294244:-_5-2	1700106J16Rik	22.3382	20.7321	22.6464	18.0621	0.928103	0.79757	1.07747	1.25381
ACGCCTTCTGCCAGATGAG	1700106J16Rik_CCDS48881.1_ex0_11:88294327-88294349:+_5-5	1700106J16Rik	22.5639	15.2524	12.1099	10.6683	0.675967	0.880953	1.47936	1.13513
GAAGAGTGGATTAAAGGCT	1700109H08Rik_CCDS39001.1_ex2_5:3577283-3577305:+_5-4	1700109H08Rik	4.46286	3.08781	3.23791	1	0.691891	0.308841	1.44531	3.23791
AAGATGGATAATACCGGGC	1700109H08Rik_CCDS39001.1_ex1_5:3575687-3575709:+_5-2	1700109H08Rik	16.1669	19.0329	17.3662	9.87578	1.17727	0.568678	0.849421	1.75846
CTTCTCTTCAAAAGTCCCT	1700109H08Rik_CCDS39001.1_ex2_5:3577316-3577338:-_5-5	1700109H08Rik	25.6011	5.55103	18.6006	11.5083	0.216828	0.618704	4.61196	1.61628
CGACTTTTCTATAGCTTGG	1700109H08Rik_CCDS39001.1_ex1_5:3575651-3575673:+_5-1	1700109H08Rik	10.7437	7.7047	6.91732	6.43642	0.717135	0.930478	1.39444	1.07472
CATTCCGAATATGTTCTGC	1700109H08Rik_CCDS39001.1_ex1_5:3575732-3575754:-_5-3	1700109H08Rik	11.2467	16.9517	8.19158	10.803	1.50726	1.31879	0.663458	0.75827
ACAGTTTCTGCAGCGCCTG	1700110M21Rik_CCDS36999.1_ex0_14:101198420-101198442:-_5-1	1700110M21Rik	40.839	28.4445	41.7602	20.4712	0.696503	0.490209	1.43574	2.03995
GGGGTATGTGTGCCAAGCA	1700110M21Rik_CCDS36999.1_ex0_14:101198533-101198555:-_5-2	1700110M21Rik	16.1798	15.9835	24.0481	18.6327	0.987866	0.77481	1.01228	1.29064
GTAAGTCCTGAAGGCGGGA	1700110M21Rik_CCDS36999.1_ex0_14:101198667-101198689:+_5-3	1700110M21Rik	10.3439	17.2546	15.4708	15.2171	1.66809	0.983604	0.599486	1.01667
TGATAGTTAGAGGGAGAGA	1700110M21Rik_CCDS36999.1_ex0_14:101198768-101198790:+_5-4	1700110M21Rik	1	1	1	1	1	1	1	1
AAGAGAAGAAATAAGCCTG	1700110M21Rik_CCDS36999.1_ex0_14:101198940-101198962:+_5-5	1700110M21Rik	2.67662	1	1.74862	3.21102	0.373606	1.83631	2.67662	0.54457
GGATGGTGTCACTTCTGCC	1700112E06Rik_CCDS49415.1_ex3_14:22584435-22584457:-_5-2	1700112E06Rik	58.063	41.4851	69.5231	47.3601	0.714484	0.681214	1.39961	1.46797
TTGTGCAGAACAAAGCACC	1700112E06Rik_CCDS49415.1_ex4_14:22596421-22596443:-_5-5	1700112E06Rik	2.83138	5.05707	2.34593	1.61021	1.78608	0.686384	0.559886	1.45691
GTGGCATGTCCCAATGAGC	1700112E06Rik_CCDS49415.1_ex3_14:22584483-22584505:+_5-4	1700112E06Rik	4.01146	24.0384	18.5768	19.6154	5.99242	1.05591	0.166877	0.947051
ACATGCCACGTTTCCCAGG	1700112E06Rik_CCDS49415.1_ex3_14:22584471-22584493:-_5-3	1700112E06Rik	21.79	7.62567	15.2637	21.026	0.349961	1.37752	2.85746	0.725944
GGGTAACCCTGGCAACACG	1700112E06Rik_CCDS49415.1_ex2_14:22577920-22577942:-_5-1	1700112E06Rik	9.77644	7.19757	7.49074	11.1358	0.736216	1.48661	1.3583	0.67267
GAACTCATAGTCCAATGAC	1700113H08Rik_CCDS48660.1_ex3_10:87225885-87225907:+_5-2	1700113H08Rik	3.80511	1	6.50319	2.56911	0.262805	0.395054	3.80511	2.5313
AAATGTCTCCATGTGAGTA	1700113H08Rik_CCDS48660.1_ex2_10:87165067-87165089:-_5-1	1700113H08Rik	11.9238	18.3479	12.2214	9.2418	1.53876	0.756197	0.649872	1.32241
CGAGGGAAATGGTGCTCGC	1700113H08Rik_CCDS48660.1_ex3_10:87225951-87225973:-_5-3	1700113H08Rik	16.4765	19.843	20.0501	18.3791	1.20432	0.916658	0.830342	1.09092
ATTTCACTGGATGATGACA	1700113H08Rik_CCDS48660.1_ex3_10:87226003-87226025:-_5-4	1700113H08Rik	6.77143	3.23271	7.64205	7.95798	0.477404	1.04134	2.09466	0.960301
GATTGGGTAGTCGTCTAGG	1700113H08Rik_CCDS48660.1_ex3_10:87226068-87226090:-_5-5	1700113H08Rik	13.3489	19.7113	9.04373	18.3712	1.47662	2.03137	0.677223	0.492279
CTGCTTGGGTACTCCAAGA	1700122O11Rik_CCDS57099.1_ex0_17:48037250-48037272:+_5-5	1700122O11Rik	10.8856	9.25904	5.61917	4.32842	0.850577	0.770294	1.17567	1.29821
GGAGAAATCTTCCCACCAC	1700122O11Rik_CCDS57099.1_ex0_17:48037178-48037200:+_5-4	1700122O11Rik	6.41031	8.48846	8.42254	6.89605	1.32419	0.818762	0.75518	1.22136
CTGATAGAGGCTCCATCAG	1700122O11Rik_CCDS57099.1_ex0_17:48037006-48037028:+_5-1	1700122O11Rik	1	1	1	1	1	1	1	1
GTTCCACGGAGTGAGGGCA	1700122O11Rik_CCDS57099.1_ex0_17:48037158-48037180:+_5-3	1700122O11Rik	22.8089	9.39735	15.2717	23.7759	0.412003	1.55686	2.42717	0.642317
CTAGATCCCAATGAGGGCA	1700122O11Rik_CCDS57099.1_ex0_17:48037056-48037078:+_5-2	1700122O11Rik	10.7502	8.91656	7.39517	18.0383	0.829434	2.43921	1.20564	0.40997
ATAAGTTCAAAATCAGATA	1700123I01Rik_CCDS50364.1_ex0_19:6195746-6195768:+_5-1	1700123I01Rik	1	1	1	1	1	1	1	1
TGTGGCCCCTGCCTGCTAG	1700123I01Rik_CCDS50364.1_ex5_19:6213372-6213394:-_5-5	1700123I01Rik	22.7573	29.136	17.3821	17.4677	1.28029	1.00492	0.781071	0.995099
AAATGGAAACGGAAACTCA	1700123I01Rik_CCDS50364.1_ex5_19:6213337-6213359:+_5-4	1700123I01Rik	1.84476	1	1.7088	1.8638	0.542077	1.09071	1.84476	0.916837
CCCACCTGAAGTTTAAACA	1700123I01Rik_CCDS50364.1_ex3_19:6212151-6212173:+_5-2	1700123I01Rik	11.0081	8.27111	8.19158	9.0833	0.751365	1.10886	1.33091	0.901828
AACAAACGGGTAGGGCGTC	1700123I01Rik_CCDS50364.1_ex3_19:6212183-6212205:-_5-3	1700123I01Rik	11.1177	4.26015	4.36085	6.88813	0.383185	1.57954	2.60971	0.633096
CATCCTGCCCTAGGGGATC	1700123K08Rik_CCDS51680.1_ex1_5:138562533-138562555:+_5-1	1700123K08Rik	2.43157	1	2.40168	2.09362	0.411256	0.871733	2.43157	1.14714
GCTGTTTTGAGTCAGTTCA	1700123K08Rik_CCDS51680.1_ex2_5:138562924-138562946:-_5-4	1700123K08Rik	11.3241	14.7255	12.1497	10.6445	1.30037	0.876109	0.76901	1.14141
ACTCTTGTAGTTGAACTGG	1700123K08Rik_CCDS51680.1_ex4_5:138564279-138564301:+_5-5	1700123K08Rik	8.4545	7.67177	6.63061	6.85643	0.907419	1.03406	1.10203	0.967065
GGGTATCTATGTCTGGGGA	1700123K08Rik_CCDS51680.1_ex2_5:138562881-138562903:+_5-3	1700123K08Rik	18.0112	20.7848	19.8669	24.3306	1.15399	1.22468	0.866557	0.81654
CCCTCCATGTTGGAGGATC	1700123K08Rik_CCDS51680.1_ex2_5:138562846-138562868:-_5-2	1700123K08Rik	20.8163	7.3754	11.1463	13.7986	0.354308	1.23795	2.8224	0.807784
CGGCACTGCCTTAGCGACC	1700123O20Rik_CCDS27099.1_ex0_14:54689990-54690012:-_5-4	1700123O20Rik	22.3962	21.4698	33.3661	18.181	0.958634	0.544894	1.04315	1.83522
GCTGACACTCAAAGATACA	1700123O20Rik_CCDS27099.1_ex0_14:54690075-54690097:-_5-5	1700123O20Rik	1	1	3.19013	1.87965	1	0.58921	1	1.69719
TGTAGAAAACGTTCCCGCT	1700123O20Rik_CCDS27099.1_ex0_14:54689965-54689987:-_5-3	1700123O20Rik	1	1	1	1	1	1	1	1
CGCTGGGGACCTGACCAAC	1700123O20Rik_CCDS27099.1_ex0_14:54689950-54689972:-_5-2	1700123O20Rik	13.5488	15.2985	13.0417	17.8719	1.12914	1.37037	0.885629	0.729732
GGGAAGTGATGTAAGACAT	1700123O20Rik_CCDS27099.1_ex0_14:54689898-54689920:-_5-1	1700123O20Rik	1.70289	3.25905	2.76006	4.8673	1.91384	1.76347	0.522511	0.567062
CGGCAATAATGCTGCAGAA	1700125H20Rik_CCDS48872.1_ex2_11:85173315-85173337:-_5-4	1700125H20Rik	7.42273	20.5214	13.416	8.37007	2.76466	0.623886	0.361708	1.60286
GTGTTAATATGGCCCCCTA	1700125H20Rik_CCDS48872.1_ex2_11:85173294-85173316:-_5-3	1700125H20Rik	13.1942	6.84192	8.56589	6.15905	0.518556	0.71902	1.92843	1.39078
GTGCTTGATCTCCCAGGCT	1700125H20Rik_CCDS48872.1_ex2_11:85173334-85173356:-_5-5	1700125H20Rik	9.04131	2.86388	5.00594	3.86085	0.316755	0.771255	3.15701	1.29659
GCTCTGGTCCGTCATGCCA	1700125H20Rik_CCDS48872.1_ex1_11:85172887-85172909:+_5-1	1700125H20Rik	15.4769	14.8639	22.081	31.5343	0.960387	1.42812	1.04125	0.700221
TCAGTGTAAAGAATACCTG	1700125H20Rik_CCDS48872.1_ex2_11:85173183-85173205:+_5-2	1700125H20Rik	2.48316	1	1	2.45816	0.402713	2.45816	2.48316	0.406808
GAGGAAAGTTTGTTTACAC	1700129C05Rik_CCDS27166.1_ex4_14:59142590-59142612:+_5-3	1700129C05Rik	3.90829	5.20855	4.73516	1	1.33269	0.211186	0.750359	4.73516
GGCATAGCAATCATTAAGG	1700129C05Rik_CCDS27166.1_ex4_14:59142620-59142642:+_5-4	1700129C05Rik	8.89944	12.0252	7.72169	9.54294	1.35123	1.23586	0.740065	0.809153
TAGACCCAGAGCTTAAAAT	1700129C05Rik_CCDS27166.1_ex3_14:59142141-59142163:-_5-1	1700129C05Rik	4.21781	3.26564	3.20605	4.31257	0.774249	1.34513	1.29157	0.743421
AAGTAGCTAGTTTCCAGAT	1700129C05Rik_CCDS27166.1_ex4_14:59142470-59142492:+_5-2	1700129C05Rik	1.79317	13.9747	8.59775	14.6069	7.79331	1.69892	0.128315	0.588609
AAAAGAGGGTTGGTACGAA	1700129C05Rik_CCDS27166.1_ex4_14:59142692-59142714:+_5-5	1700129C05Rik	4.53379	1	5.15726	9.62219	0.220566	1.86576	4.53379	0.535975
GTACGCCCGCTTCTTGAGG	1810009A15Rik_CCDS29555.1_ex1_19:8889231-8889253:-_5-4	1810009A15Rik	24.363	24.1898	24.1596	22.9755	0.992892	0.950988	1.00716	1.05154
ACGGAAACGCCAGGTGGTC	1810009A15Rik_CCDS29555.1_ex1_19:8889176-8889198:+_5-2	1810009A15Rik	46.4621	30.1371	29.6787	28.6021	0.648639	0.963725	1.54169	1.03764
ATTAAGCAGGGATCGGCGA	1810009A15Rik_CCDS29555.1_ex1_19:8889158-8889180:+_5-1	1810009A15Rik	10.7695	9.20635	10.5489	12.7842	0.854852	1.21189	1.16979	0.825156
GTGATGTTGGCACGAGCAC	1810009A15Rik_CCDS29555.1_ex2_19:8890005-8890027:-_5-5	1810009A15Rik	26.117	35.9461	15.7734	19.6471	1.37635	1.24558	0.72656	0.802837
TCGGGGCTGTGATAGACGA	1810009A15Rik_CCDS29555.1_ex1_19:8889193-8889215:+_5-3	1810009A15Rik	9.21542	12.236	10.2622	15.4311	1.32777	1.50367	0.753141	0.665038
AAGCATTCGGTTCCTTACC	1810009J06Rik_CCDS20042.1_ex1_6:40966215-40966237:+_5-1	1810009J06Rik	11.3821	12.0582	12.3409	5.01788	1.05939	0.406606	0.943936	2.45938
AAATTGCTCACCACCCTCA	1810009J06Rik_CCDS20042.1_ex2_6:40966646-40966668:-_5-4	1810009J06Rik	8.29328	5.69593	9.44194	5.59639	0.686812	0.592716	1.456	1.68715
GCATTAGCCATCAGTGTGG	1810009J06Rik_CCDS20042.1_ex1_6:40966252-40966274:+_5-2	1810009J06Rik	31.8626	12.0252	26.7638	19.0369	0.377408	0.71129	2.64965	1.4059
CGACACCCAGACTATAACA	1810009J06Rik_CCDS20042.1_ex2_6:40966688-40966710:+_5-5	1810009J06Rik	16.5861	8.30404	6.8775	6.69793	0.500663	0.973891	1.99735	1.02681
GTGTTCACCAAGGCGAACC	1810009J06Rik_CCDS20042.1_ex2_6:40966613-40966635:-_5-3	1810009J06Rik	3.12801	3.70691	7.2996	8.50479	1.18507	1.1651	0.843833	0.858293
CCATCATTGGTATGGCAGT	1810011H11Rik_CCDS49438.1_ex2_14:32806791-32806813:+_5-3	1810011H11Rik	13.6585	14.0669	14.077	12.2691	1.02991	0.871566	0.970962	1.14736
TACCTATCTCAGTCTCAGC	1810011H11Rik_CCDS49438.1_ex1_14:32805159-32805181:-_5-1	1810011H11Rik	17.85	18.5784	14.4991	13.7986	1.04081	0.951681	0.960791	1.05077
CGGATCATGCAGATCTTCA	1810011H11Rik_CCDS49438.1_ex2_14:32806840-32806862:-_5-5	1810011H11Rik	2.54765	11.3732	6.37576	7.15757	4.4642	1.12262	0.224005	0.890772
TGGGAGTAGCCATATCTGC	1810011H11Rik_CCDS49438.1_ex2_14:32806809-32806831:+_5-4	1810011H11Rik	22.2285	14.6004	13.7505	23.2529	0.656831	1.69105	1.52246	0.591347
ATTTCAAATATGCCATCAT	1810011H11Rik_CCDS49438.1_ex2_14:32806779-32806801:+_5-2	1810011H11Rik	7.49367	10.0428	7.77744	18.0621	1.34017	2.32237	0.746174	0.430595
GTTCCTGAAGAGCCTCTGC	1810011O10Rik_CCDS22194.1_ex0_8:24438734-24438756:+_5-2	1810011O10Rik	8.80272	7.47419	16.8485	8.39384	0.849077	0.498194	1.17775	2.00725
TCCTCCAAATCTTGGTCGA	1810011O10Rik_CCDS22194.1_ex0_8:24438669-24438691:+_5-1	1810011O10Rik	19.0881	15.7135	18.5529	12.4434	0.823207	0.670701	1.21476	1.49098
ATCTTTGAGAACATAGACC	1810011O10Rik_CCDS22194.1_ex0_8:24438761-24438783:-_5-3	1810011O10Rik	15.0836	9.91107	9.54547	7.87081	0.657076	0.824559	1.52189	1.21277
GCCGCTCGCAAGAAAGCTG	1810011O10Rik_CCDS22194.1_ex0_8:24438788-24438810:-_5-4	1810011O10Rik	19.1526	26.9099	23.6977	20.4633	1.40503	0.863516	0.71173	1.15806
GCGAGCGGCTGTGTCGAAG	1810011O10Rik_CCDS22194.1_ex0_8:24438800-24438822:+_5-5	1810011O10Rik	17.2761	13.922	8.74906	21.1369	0.805856	2.41591	1.24092	0.413923
CCGTGGCTCAGCTCTACAA	1810013L24Rik_CCDS49756.1_ex0_16:8830664-8830686:+_5-2	1810013L24Rik	9.86028	18.1372	10.1826	10.2324	1.83942	1.00489	0.54365	0.995133
TTGTGCTCGGGCTGCGCGG	1810013L24Rik_CCDS49756.1_ex0_16:8830602-8830624:-_5-1	1810013L24Rik	35.4029	27.6278	19.413	20.9547	0.780383	1.07941	1.28142	0.926428
TTATAGAGGTTGGTGACGG	1810013L24Rik_CCDS49756.1_ex1_16:8831378-8831400:-_5-3	1810013L24Rik	8.76403	11.7025	3.70779	4.1937	1.33529	1.13105	0.748902	0.884135
GGCTATCAGCGACGCAATA	1810013L24Rik_CCDS49756.1_ex2_16:8843014-8843036:+_5-5	1810013L24Rik	10.2407	18.2623	5.3245	6.80096	1.7833	1.27729	0.560758	0.782905
TTGATATTGGAATTCAGAT	1810013L24Rik_CCDS49756.1_ex2_16:8842994-8843016:+_5-4	1810013L24Rik	3.91473	3.31833	1.75659	3.15555	0.84765	1.79641	1.17973	0.556667
CGTGCACCCCCCAGCCGCC	1810019J16Rik_CCDS38905.1_ex0_4:133528390-133528412:+_5-3	1810019J16Rik	10.8533	11.4259	8.80481	6.28584	1.05275	0.71391	0.949892	1.40074
ACCGGGCCGTCGCACCAGG	1810019J16Rik_CCDS38905.1_ex0_4:133528083-133528105:+_5-1	1810019J16Rik	48.8803	40.3918	45.8378	46.4012	0.826341	1.01229	1.21015	0.987859
CATGGCGGTAGGGGTAGAC	1810019J16Rik_CCDS38905.1_ex0_4:133528481-133528503:-_5-4	1810019J16Rik	5.52687	10.6685	10.1189	11.0645	1.93029	1.09345	0.518056	0.914536
TAGGCAAGCTGTGCCGCGT	1810019J16Rik_CCDS38905.1_ex0_4:133528562-133528584:-_5-5	1810019J16Rik	13.8971	11.2349	12.4046	16.4851	0.808436	1.32895	1.23696	0.752474
AGGGTCTGCCGAAGCCGCC	1810019J16Rik_CCDS38905.1_ex0_4:133528332-133528354:+_5-2	1810019J16Rik	20.7067	25.1646	19.6439	30.3456	1.21529	1.54478	0.82285	0.647342
TGATGGAATATGCATCCCG	1810024B03Rik_CCDS50702.1_ex0_2:127187183-127187205:-_5-5	1810024B03Rik	5.63004	8.38966	14.0372	11.7223	1.49016	0.835084	0.671069	1.19748
AAGCGTCGGCCTCTAGATG	1810024B03Rik_CCDS50702.1_ex0_2:127187139-127187161:-_5-4	1810024B03Rik	11.0468	16.7409	15.5106	13.7589	1.51545	0.887068	0.659869	1.12731
ATGGCCATCCCAATCCAAT	1810024B03Rik_CCDS50702.1_ex0_2:127187022-127187044:+_5-2	1810024B03Rik	5.90733	4.97804	6.34391	7.20512	0.842688	1.13575	1.18668	0.880472
TTTGGCATAAGCAAAAGAC	1810024B03Rik_CCDS50702.1_ex0_2:127186986-127187008:-_5-1	1810024B03Rik	1	4.1416	4.51217	5.35072	4.1416	1.18584	0.241453	0.843282
AAAGAGAGTTCTGAAAACA	1810024B03Rik_CCDS50702.1_ex0_2:127187104-127187126:+_5-3	1810024B03Rik	2.58634	1	2.41761	3.0446	0.386647	1.25934	2.58634	0.794065
CCGCGCGGCCCTGTACGTG	1810026J23Rik_CCDS22908.1_ex1_9:21593228-21593250:+_5-1	1810026J23Rik	18.6819	36.1305	5.78642	8.67914	1.93399	1.49991	0.517066	0.666705
ACGCGCAACCGCCACTCGG	1810026J23Rik_CCDS22908.1_ex1_9:21593355-21593377:+_5-4	1810026J23Rik	19.2106	18.8155	1.90791	3.25857	0.979434	1.70793	1.021	0.585504
GCGCTGGCGCCCAGTGAGG	1810026J23Rik_CCDS22908.1_ex1_9:21593277-21593299:+_5-2	1810026J23Rik	8.26749	20.7321	1	2.03022	2.50767	2.03022	0.398777	0.492556
GACCCCGATGCGTCCAGCA	1810026J23Rik_CCDS22908.1_ex1_9:21593312-21593334:-_5-3	1810026J23Rik	15.7478	24.1306	1.60527	4.60579	1.53232	2.86916	0.652607	0.348534
CGGCTGCGTCACGTGAACC	1810026J23Rik_CCDS22908.1_ex1_9:21593415-21593437:+_5-5	1810026J23Rik	2.91521	15.1207	1.90791	5.68356	5.18683	2.97895	0.192796	0.335689
CCGCCGCGGCAGGTAGCAT	1810030O07Rik_CCDS30024.1_ex5_X:12673353-12673375:+_5-5	1810030O07Rik	11.0919	2.0933	7.44295	3.11592	0.188723	0.418641	5.29878	2.38868
GATGAAAGTTTCATCTACC	1810030O07Rik_CCDS30024.1_ex2_X:12664590-12664612:-_5-2	1810030O07Rik	4.34034	6.34137	5.79438	4.58201	1.46103	0.790768	0.684448	1.26459
GGCATCACATCAACAGAAA	1810030O07Rik_CCDS30024.1_ex4_X:12673090-12673112:-_5-4	1810030O07Rik	6.6747	5.40614	3.69983	3.97973	0.809944	1.07565	1.23465	0.929669
TTTGTGGTTGACCGGAAGA	1810030O07Rik_CCDS30024.1_ex3_X:12669535-12669557:-_5-3	1810030O07Rik	11.1242	8.07353	7.70577	13.4578	0.725764	1.74646	1.37786	0.572588
ATCTGAAAATCTCGAAGCC	1810030O07Rik_CCDS30024.1_ex2_X:12664572-12664594:+_5-1	1810030O07Rik	7.50656	9.17342	2.60875	8.9565	1.22205	3.43326	0.818295	0.291268
TGAAAGCAGAGCTTTCGAA	1810033B17Rik_CCDS22069.1_ex3_8:3667289-3667311:+_5-4	1810033B17Rik	5.22378	3.46981	14.6425	6.16697	0.664232	0.42117	1.5055	2.37434
CACACCGTGTCTGAAACTA	1810033B17Rik_CCDS22069.1_ex4_8:3667393-3667415:-_5-5	1810033B17Rik	20.7712	12.3018	13.2647	8.23535	0.592255	0.620847	1.68846	1.6107
GACTACGAGAATATAACCT	1810033B17Rik_CCDS22069.1_ex1_8:3666065-3666087:+_5-1	1810033B17Rik	4.84977	10.1811	5.3484	5.0892	2.09929	0.951538	0.47635	1.05093
AGAACATACAACATCATAA	1810033B17Rik_CCDS22069.1_ex2_8:3667060-3667082:-_5-3	1810033B17Rik	1	1	1.63713	1.99853	1	1.22075	1	0.819168
GTTCTGTACAACCAAGGCG	1810033B17Rik_CCDS22069.1_ex2_8:3667039-3667061:-_5-2	1810033B17Rik	7.91282	6.66409	7.74559	16.5722	0.842189	2.13957	1.18738	0.467383
CCGAAACACTCCTACTGGC	1810037I17Rik_CCDS38619.1_ex0_3:122924573-122924595:+_4-4	1810037I17Rik	16.2959	15.5752	20.289	7.62514	0.955771	0.375826	1.04628	2.66081
GGAAGGAGGAACCAAGATG	1810037I17Rik_CCDS38619.1_ex0_3:122924525-122924547:+_4-1	1810037I17Rik	1.01935	4.19428	3.45294	1.57851	4.11468	0.45715	0.243032	2.18747
AAGATGAGGCACCTCAGTC	1810037I17Rik_CCDS38619.1_ex0_3:122924538-122924560:+_4-2	1810037I17Rik	5.08837	3.12733	5.2369	3.845	0.614604	0.734214	1.62707	1.362
TTCGGAAGCCCGTTCATCC	1810037I17Rik_CCDS38619.1_ex0_3:122924557-122924579:-_4-3	1810037I17Rik	2.49606	13.2634	6.41558	11.0566	5.31375	1.72339	0.188191	0.58025
CAAATATCGTAGTTCATGG	1810041L15Rik_CCDS49687.1_ex1_15:84406661-84406683:+_5-2	1810041L15Rik	12.904	9.71348	11.7993	10.7475	0.752751	0.910859	1.32846	1.09786
CTGGATCCCCCACCGAGTG	1810041L15Rik_CCDS49687.1_ex1_15:84406630-84406652:+_5-1	1810041L15Rik	10.8598	18.1438	19.0944	17.761	1.67073	0.930165	0.598542	1.07508
AGCCTTACACGGATCACAA	1810041L15Rik_CCDS49687.1_ex2_15:84417265-84417287:-_5-5	1810041L15Rik	6.31359	11.9001	10.9631	15.2013	1.88484	1.38659	0.53055	0.721196
TTTTGTTGTCCGAGAGCCG	1810041L15Rik_CCDS49687.1_ex2_15:84417217-84417239:+_5-4	1810041L15Rik	14.529	12.776	9.5614	16.6673	0.879347	1.74319	1.13721	0.573661
TGCAACGAGACGGAGTTCC	1810041L15Rik_CCDS49687.1_ex2_15:84417149-84417171:-_5-3	1810041L15Rik	6.35228	7.6125	4.36085	7.86288	1.19839	1.80306	0.834454	0.554612
CTGCGCACCGGTTCCAGGG	1810043G02Rik_CCDS35954.1_ex3_10:77981598-77981620:-_5-2	1810043G02Rik	14.6386	8.53456	19.6201	13.6876	0.583016	0.697634	1.71522	1.43342
CTGACCCGCGCGCTGATGG	1810043G02Rik_CCDS35954.1_ex4_10:77982886-77982908:+_5-5	1810043G02Rik	20.3714	37.9747	33.2307	30.7418	1.86412	0.925103	0.536446	1.08096
CCTAGAGGTAATCACACTC	1810043G02Rik_CCDS35954.1_ex2_10:77980526-77980548:+_5-1	1810043G02Rik	9.89897	8.44894	13.5275	12.9902	0.853517	0.960282	1.17162	1.04136
AGAACAGCTCGTTCAGACT	1810043G02Rik_CCDS35954.1_ex3_10:77981663-77981685:-_5-3	1810043G02Rik	10.9501	3.39736	1	1	0.310259	1	3.22311	1
CAGCACGGTCATGCGGTAA	1810043G02Rik_CCDS35954.1_ex3_10:77981755-77981777:-_5-4	1810043G02Rik	11.1564	7.88253	12.1338	15.7005	0.706546	1.29395	1.41534	0.772828
CCAGGAGGCCGCCTGAGTA	1810043H04Rik_CCDS36388.1_ex1_11:120099186-120099208:+_5-3	1810043H04Rik	14.3484	13.4017	11.2657	8.31459	0.934019	0.738044	1.07064	1.35493
TGCAGGCGTCCACCGCCCC	1810043H04Rik_CCDS36388.1_ex1_11:120099169-120099191:+_5-2	1810043H04Rik	12.8975	5.05707	7.14032	7.49834	0.392096	1.05014	2.5504	0.952253
GCTTATGGCAAGTGCGTGC	1810043H04Rik_CCDS36388.1_ex1_11:120099153-120099175:+_5-1	1810043H04Rik	14.5097	6.1833	5.24486	6.21452	0.426151	1.18488	2.34659	0.843969
AACGCAGAGGTCCTTACTC	1810043H04Rik_CCDS36388.1_ex1_11:120099198-120099220:-_5-4	1810043H04Rik	10.0086	3.16684	2.33	3.59141	0.316413	1.54138	3.16043	0.648771
CTCGAACTCGCGAACGCAG	1810043H04Rik_CCDS36388.1_ex1_11:120099210-120099232:-_5-5	1810043H04Rik	11.0919	14.3699	2.64857	7.53796	1.29553	2.84605	0.771888	0.351364
AGCCAGGTAGGATTCCAGC	1810046K07Rik_CCDS52792.1_ex1_9:51291669-51291691:+_5-2	1810046K07Rik	20.9324	22.3787	24.5578	14.1948	1.06909	0.578016	0.935373	1.73006
TGCCCAGCCGTGGACTCGC	1810046K07Rik_CCDS52792.1_ex1_9:51291703-51291725:+_5-3	1810046K07Rik	20.3714	28.4972	24.2233	15.7956	1.39888	0.652083	0.714855	1.53355
GCAAAGGGCTTGCTCATGC	1810046K07Rik_CCDS52792.1_ex1_9:51291724-51291746:+_5-4	1810046K07Rik	14.7289	17.3732	16.5379	16.382	1.17953	0.990573	0.847796	1.00952
GAAATGAGTTGGGTCACTG	1810046K07Rik_CCDS52792.1_ex1_9:51291552-51291574:+_5-1	1810046K07Rik	12.8201	17.4786	9.53751	12.6415	1.36337	1.32546	0.733479	0.754458
CGAATGACCTCTACACCTC	1810046K07Rik_CCDS52792.1_ex1_9:51291743-51291765:-_5-5	1810046K07Rik	26.7812	13.6125	9.55344	14.6861	0.508285	1.53726	1.9674	0.650507
TCAGGCTGGTAGCACGCGC	1810055G02Rik_CCDS50342.1_ex1_19:3717165-3717187:-_5-4	1810055G02Rik	9.82803	7.08561	16.3548	7.71231	0.720959	0.471563	1.38704	2.12061
ACACGGCGACTCTTGCTGC	1810055G02Rik_CCDS50342.1_ex1_19:3716898-3716920:+_5-2	1810055G02Rik	46.849	24.5521	42.0868	37.8583	0.524068	0.899529	1.90815	1.11169
CCTCAGGTGCCCAAATACA	1810055G02Rik_CCDS50342.1_ex1_19:3717009-3717031:+_5-3	1810055G02Rik	12.2011	7.30953	7.59427	7.61721	0.599089	1.00302	1.6692	0.996988
AGCCCTACATTACCTACCC	1810055G02Rik_CCDS50342.1_ex1_19:3717224-3717246:+_5-5	1810055G02Rik	8.04179	10.787	10.2543	16.0968	1.34137	1.56976	0.745506	0.63704
GTAAATCAAAGCATGCTGA	1810055G02Rik_CCDS50342.1_ex1_19:3716522-3716544:+_5-1	1810055G02Rik	7.85478	2.58726	4.20953	9.15462	0.329387	2.17474	3.03594	0.459825
TGATAAGAAATTGCTCATG	1810062G17Rik_CCDS57208.1_ex1_3:36479538-36479560:-_5-4	1810062G17Rik	1.02579	5.53127	7.71373	3.78161	5.39219	0.490244	0.185454	2.0398
ATGTGGCTGGAGAAGCAAA	1810062G17Rik_CCDS57208.1_ex1_3:36479522-36479544:-_5-3	1810062G17Rik	15.4898	6.53896	7.59427	4.59786	0.422145	0.605438	2.36886	1.6517
TGGGCCTTTTATACCCTGG	1810062G17Rik_CCDS57208.1_ex2_3:36481809-36481831:-_5-5	1810062G17Rik	12.1173	7.42809	12.3887	9.31312	0.613017	0.751746	1.63128	1.33024
CCGACCTCCTGCATACGCA	1810062G17Rik_CCDS57208.1_ex1_3:36479487-36479509:+_5-2	1810062G17Rik	15.5479	17.1822	27.9425	27.7621	1.10511	0.993542	0.904884	1.0065
ATCTTAGTCACCTTGCACC	1810062G17Rik_CCDS57208.1_ex0_3:36476229-36476251:-_5-1	1810062G17Rik	38.7948	44.462	39.586	46.3933	1.14608	1.17196	0.872538	0.853271
GAGGTATTGCATGTACCCA	1810065E05Rik_CCDS24730.1_ex1_11:58422244-58422266:-_5-1	1810065E05Rik	19.1333	15.9242	20.4563	17.2459	0.83228	0.843059	1.20152	1.18616
TGGCATTCTCGGCGACACT	1810065E05Rik_CCDS24730.1_ex2_11:58422791-58422813:+_5-3	1810065E05Rik	22.9572	7.8957	20.4324	21.6283	0.343931	1.05853	2.90756	0.944708
ACTGATAAGTGCAATCAAG	1810065E05Rik_CCDS24730.1_ex2_11:58422853-58422875:+_5-4	1810065E05Rik	4.52734	8.55432	4.58384	5.00995	1.88948	1.09296	0.529247	0.914947
CTAGATGAATGTACTGGAC	1810065E05Rik_CCDS24730.1_ex2_11:58422772-58422794:+_5-2	1810065E05Rik	7.40339	9.50272	11.3454	12.6653	1.28356	1.11634	0.77908	0.895782
TTGCCTGCTATATGGAGGC	1810065E05Rik_CCDS24730.1_ex3_11:58423853-58423875:+_5-5	1810065E05Rik	12.717	5.18221	12.2134	14.488	0.407503	1.18624	2.45397	0.843003
CGTCCTCATCTTGGATCTC	2010001E11Rik_CCDS48539.1_ex0_10:39922163-39922185:-_4-4	2010001E11Rik	7.63553	20.9231	10.8994	7.90251	2.74023	0.725042	0.364933	1.37923
GTCAAGGTCGGACTCGGTG	2010001E11Rik_CCDS48539.1_ex0_10:39922027-39922049:+_4-3	2010001E11Rik	7.86123	16.0494	10.3021	11.4845	2.04158	1.11478	0.489816	0.897039
AATCCTCCAACGCCACCAC	2010001E11Rik_CCDS48539.1_ex0_10:39921990-39922012:-_4-2	2010001E11Rik	5.46238	22.5762	13.5196	24.4733	4.13304	1.81021	0.241953	0.552421
TGTGAGCCACACTTCCGCA	2010002M12Rik_CCDS29765.1_ex0_19:34619735-34619757:+_5-5	2010002M12Rik	28.748	28.6882	24.6135	24.1484	0.997919	0.981101	1.00209	1.01926
ATTACCATCATAGTAATCC	2010002M12Rik_CCDS29765.1_ex0_19:34619617-34619639:+_5-4	2010002M12Rik	1	1	1	1	1	1	1	1
TCTCTACAACCCTTAAAGA	2010002M12Rik_CCDS29765.1_ex0_19:34619596-34619618:-_5-3	2010002M12Rik	1	2.84412	1	1	2.84412	1	0.351602	1
ATGAAAAAAGCTACAAGCA	2010002M12Rik_CCDS29765.1_ex0_19:34619296-34619318:-_5-1	2010002M12Rik	1	3.25905	3.50869	4.64541	3.25905	1.32397	0.306838	0.755302
GGGTTCCTTAAAAAAGCCT	2010002M12Rik_CCDS29765.1_ex0_19:34619386-34619408:-_5-2	2010002M12Rik	1.57392	2.82436	2.17869	3.14762	1.79448	1.44473	0.557265	0.692169
TCGCAGGTCCCCGATGGCA	2010003K11Rik_CCDS29429.1_ex1_19:4498360-4498382:-_5-3	2010003K11Rik	17.908	8.11963	22.2004	12.0472	0.453407	0.542655	2.20552	1.84279
TGATCCAAGGCCAGAGAGG	2010003K11Rik_CCDS29429.1_ex1_19:4498278-4498300:-_5-2	2010003K11Rik	2.59279	3.23929	2.67246	1.84795	1.24935	0.691481	0.800417	1.44617
GTACTGTCTCAGCCACCGC	2010003K11Rik_CCDS29429.1_ex1_19:4498249-4498271:+_5-1	2010003K11Rik	8.94458	16.8858	16.0044	12.0234	1.88782	0.751258	0.52971	1.3311
CTTCTCACGGCCCAGTCTG	2010003K11Rik_CCDS29429.1_ex1_19:4498387-4498409:+_5-5	2010003K11Rik	16.3217	16.9187	21.6509	27.4371	1.03658	1.26725	0.964712	0.789109
CGTGAGAAGTCCAGGTCGC	2010003K11Rik_CCDS29429.1_ex1_19:4498375-4498397:-_5-4	2010003K11Rik	11.2209	9.42369	12.54	21.6996	0.839833	1.73043	1.19071	0.57789
TGTGAAGACTTTTATGTGG	2010005H15Rik_CCDS37330.1_ex2_16:36257270-36257292:-_1-1	2010005H15Rik	1	1	1	1	1	1	1	1
ACATCTTCCGAGTGTAAGA	2010012O05Rik_CCDS38011.1_ex1_19:46699599-46699621:-_5-5	2010012O05Rik	14.1292	8.47528	16.0442	10.3988	0.599842	0.648137	1.66711	1.54288
GTAATCGCGCTCACCAAGC	2010012O05Rik_CCDS38011.1_ex0_19:46690037-46690059:+_5-1	2010012O05Rik	13.0458	19.54	19.9227	13.9967	1.4978	0.70255	0.667648	1.42339
GGGCAGGCAGCTCGAAACA	2010012O05Rik_CCDS38011.1_ex1_19:46699561-46699583:+_5-4	2010012O05Rik	10.0215	5.62348	14.0452	12.5544	0.561142	0.893855	1.78208	1.11875
AAAGGCTCGCGGAGCTCCG	2010012O05Rik_CCDS38011.1_ex0_19:46690064-46690086:+_5-2	2010012O05Rik	4.30165	6.60482	7.15624	6.63454	1.53542	0.927098	0.651289	1.07864
TTTTGTTTTCTAGCTGCTG	2010012O05Rik_CCDS38011.1_ex1_19:46699542-46699564:+_5-3	2010012O05Rik	20.2746	12.2492	19.6439	22.5158	0.604161	1.1462	1.65519	0.87245
CAAGGGTGCCGAGAAAATG	2010015L04Rik_CCDS51402.1_ex2_4:155418864-155418886:+_5-3	2010015L04Rik	4.0824	1	6.27223	4.10652	0.244954	0.654715	4.0824	1.52738
CTTCCGAAGATGAAACGCC	2010015L04Rik_CCDS51402.1_ex2_4:155418910-155418932:-_5-4	2010015L04Rik	11.5369	6.11086	12.8506	8.96443	0.529679	0.69759	1.88793	1.43351
AGAGTCCAGTTGGAGGATC	2010015L04Rik_CCDS51402.1_ex1_4:155418621-155418643:+_5-1	2010015L04Rik	12.3301	14.3106	11.5046	15.0348	1.16063	1.30685	0.861602	0.765199
CATCCTCTAGTCCCTCAGA	2010015L04Rik_CCDS51402.1_ex1_4:155418661-155418683:-_5-2	2010015L04Rik	21.0678	13.6191	8.49421	12.4276	0.64644	1.46306	1.54693	0.683497
CTCATGCATCTTGTCTAGA	2010015L04Rik_CCDS51402.1_ex2_4:155418940-155418962:-_5-5	2010015L04Rik	1.0129	5.5181	2.83971	5.16845	5.44784	1.82006	0.183559	0.549431
GTACCAGTAGTCTCCCCAT	2010106E10Rik_CCDS30360.1_ex2_X:112512410-112512432:-_5-3	2010106E10Rik	10.6986	3.39736	9.39415	6.39679	0.317552	0.680933	3.14909	1.46857
TCCAAATTTCAGAGGCCAA	2010106E10Rik_CCDS30360.1_ex2_X:112512394-112512416:+_5-2	2010106E10Rik	9.41533	7.71129	16.9919	12.0313	0.819015	0.708063	1.22098	1.4123
TGACTTCCCTTTACAGTAA	2010106E10Rik_CCDS30360.1_ex2_X:112512539-112512561:-_5-5	2010106E10Rik	3.46979	1	4.75109	4.76428	0.288202	1.00278	3.46979	0.997231
GGAGAAATGTGATCAACTC	2010106E10Rik_CCDS30360.1_ex2_X:112512436-112512458:+_5-4	2010106E10Rik	5.12706	3.21953	1.80437	2.12532	0.62795	1.17787	1.59248	0.848988
ATGCACAAACAATAGACTC	2010106E10Rik_CCDS30360.1_ex1_X:112497932-112497954:-_5-1	2010106E10Rik	1	1	1	3.17932	1	3.17932	1	0.314533
TAAAATCAGGAGTGCTGGT	2010107E04Rik_CCDS36566.1_ex2_12:111963225-111963247:-_3-1	2010107E04Rik	7.37759	5.17562	10.533	5.72318	0.701533	0.543356	1.42545	1.84041
CCTCATCGTATATAAAATC	2010107E04Rik_CCDS36566.1_ex2_12:111963237-111963259:-_3-2	2010107E04Rik	1.73513	3.41053	3.42108	2.84648	1.96558	0.83204	0.508757	1.20187
GGAAATTTGGGTAGGAGTG	2010107E04Rik_CCDS36566.1_ex2_12:111963267-111963289:-_3-3	2010107E04Rik	8.02889	1	4.90241	4.9307	0.12455	1.00577	8.02889	0.994261
CATGATAGCGCCCTGCAGC	2010107G12Rik_CCDS19998.1_ex4_6:34957040-34957062:+_5-5	2010107G12Rik	12.0979	8.15915	17.0397	8.90103	0.674426	0.522371	1.48274	1.91435
CATATGCCGTGGGGGACTC	2010107G12Rik_CCDS19998.1_ex2_6:34955041-34955063:+_5-1	2010107G12Rik	14.1099	11.1624	25.848	17.8878	0.791109	0.692037	1.26405	1.44501
TGGTCGGCGCGATGGTCAA	2010107G12Rik_CCDS19998.1_ex4_6:34956949-34956971:+_5-3	2010107G12Rik	15.3802	19.7442	18.5847	21.6203	1.28374	1.16334	0.778974	0.859594
TGCAGAATCAAAGAGAGGC	2010107G12Rik_CCDS19998.1_ex4_6:34956914-34956936:+_5-2	2010107G12Rik	6.82302	2.87047	3.54055	5.53299	0.420703	1.56275	2.37697	0.639898
CCCACTAGCATCTGGACAC	2010107G12Rik_CCDS19998.1_ex4_6:34957011-34957033:+_5-4	2010107G12Rik	7.71292	7.94181	6.6784	21.3826	1.02968	3.20176	0.971179	0.312329
GGCCACGGCGCACCTCCAG	2010107G23Rik_CCDS23886.1_ex0_10:62109087-62109109:-_5-5	2010107G23Rik	34.6678	11.5576	11.194	4.01935	0.333382	0.359062	2.99956	2.78504
GGTCACAGGTTCCACCACG	2010107G23Rik_CCDS23886.1_ex0_10:62108949-62108971:+_5-1	2010107G23Rik	10.3762	8.19208	17.199	10.5415	0.78951	0.612913	1.26661	1.63155
TGGCACCTTGGGAACCACG	2010107G23Rik_CCDS23886.1_ex0_10:62108964-62108986:-_5-2	2010107G23Rik	4.47576	10.2206	7.57038	4.69296	2.28355	0.619911	0.437915	1.61314
GATTGGGCAGCACCCAGTC	2010107G23Rik_CCDS23886.1_ex0_10:62109034-62109056:+_5-4	2010107G23Rik	13.9486	7.95498	15.5424	14.2899	0.570305	0.919412	1.75345	1.08765
TCCTTTCAGTGACCTGAAC	2010107G23Rik_CCDS23886.1_ex0_10:62109013-62109035:-_5-3	2010107G23Rik	7.95796	25.3424	14.5071	19.0131	3.18454	1.31061	0.314017	0.763006
CACAACTATTGTGACACCG	2010109A12Rik_CCDS57357.1_ex1_5:93208135-93208157:+_5-1	2010109A12Rik	3.48268	6.63775	14.6823	13.2121	1.90593	0.899867	0.524678	1.11128
AAATAGCATCAGAGATATG	2010109A12Rik_CCDS57357.1_ex2_5:93213281-93213303:+_5-5	2010109A12Rik	1	1	1	1	1	1	1	1
AGAGGCAGAAACGATTCCA	2010109A12Rik_CCDS57357.1_ex1_5:93208152-93208174:-_5-2	2010109A12Rik	4.0695	1.96816	3.62019	4.15407	0.483638	1.14747	2.06766	0.871479
ATATCCAACATTATCTTCA	2010109A12Rik_CCDS57357.1_ex2_5:93213249-93213271:-_5-4	2010109A12Rik	2.64437	1	2.62468	3.17932	0.378161	1.21132	2.64437	0.825546
CATTTCTTCAAGGAAGACT	2010109A12Rik_CCDS57357.1_ex1_5:93208173-93208195:+_5-3	2010109A12Rik	2.79914	4.09549	1	2.22042	1.46313	2.22042	0.683468	0.450365
GGTCAAGCAGTAGAGGCTC	2010109I03Rik_CCDS27537.1_ex1_15:74880684-74880706:+_5-4	2010109I03Rik	6.96489	13.0592	11.7197	7.56174	1.87501	0.645218	0.53333	1.54986
CATGAATGCAGTGGTATAG	2010109I03Rik_CCDS27537.1_ex1_15:74880735-74880757:-_5-5	2010109I03Rik	4.76594	7.44784	8.27918	9.47954	1.56272	1.14499	0.639909	0.873374
CAGTCGTTTGCTGACCTGG	2010109I03Rik_CCDS27537.1_ex0_15:74880008-74880030:+_5-2	2010109I03Rik	29.7217	24.0976	21.5314	31.7958	0.810775	1.47672	1.23339	0.677179
ACATGATTAATGTCAGGGC	2010109I03Rik_CCDS27537.1_ex0_15:74879965-74879987:+_5-1	2010109I03Rik	7.37759	8.71897	9.21098	15.1616	1.18182	1.64604	0.846154	0.607519
AGATACTCACTATACCAGT	2010109I03Rik_CCDS27537.1_ex1_15:74880664-74880686:+_5-3	2010109I03Rik	4.39192	1	1.90791	3.34574	0.227691	1.75362	4.39192	0.570249
CAATTGGAGCTTACGGATC	2010111I01Rik_CCDS36699.1_ex0_13:63015834-63015856:+_5-3	2010111I01Rik	11.6336	2.2843	6.92529	1.00792	0.196353	0.145543	5.09286	6.87084
AACCAGTCGCGTTCTACCC	2010111I01Rik_CCDS36699.1_ex0_13:63015328-63015350:+_5-1	2010111I01Rik	12.2269	6.53237	13.0497	5.89753	0.534263	0.451929	1.87174	2.21274
TCCGCTTCCGATGGCGAGA	2010111I01Rik_CCDS36699.1_ex2_13:63061167-63061189:-_5-5	2010111I01Rik	8.39001	11.8606	9.93571	10.2245	1.41365	1.02906	0.707387	0.971758
TGCTACACTCGTTGCAGCC	2010111I01Rik_CCDS36699.1_ex0_13:63015778-63015800:+_5-2	2010111I01Rik	10.144	20.1525	16.9441	20.6218	1.98664	1.21705	0.503362	0.82166
GGGATCCCCCATCAACAAC	2010111I01Rik_CCDS36699.1_ex1_13:63033040-63033062:+_5-4	2010111I01Rik	1.01935	5.37979	2.16276	3.78953	5.27769	1.75218	0.189477	0.570719
CTCATCTAGGGTCCACGAC	2010300C02Rik_CCDS48242.1_ex3_1:37626020-37626042:+_5-2	2010300C02Rik	9.29925	16.6158	15.6858	9.46369	1.78679	0.603329	0.559664	1.65747
CACCCGCACGGGCCGAGCA	2010300C02Rik_CCDS48242.1_ex6_1:37631857-37631879:+_5-4	2010300C02Rik	43.7473	47.8605	49.7482	38.9598	1.09402	0.78314	0.914059	1.27691
CATTGCCGTTGAGGAGTCG	2010300C02Rik_CCDS48242.1_ex7_1:37637890-37637912:-_5-5	2010300C02Rik	22.6219	17.8276	13.4479	11.12	0.788069	0.826894	1.26892	1.20934
TGGACCCACATCGTGCAGC	2010300C02Rik_CCDS48242.1_ex5_1:37631335-37631357:+_5-3	2010300C02Rik	17.5405	11.1558	12.2772	14.908	0.636006	1.21429	1.57231	0.823526
TCCCGCTGCCTAGCGTCCG	2010300C02Rik_CCDS48242.1_ex3_1:37625952-37625974:+_5-1	2010300C02Rik	17.3599	7.33588	15.0726	25.1469	0.422576	1.66839	2.36644	0.599381
TCCTCTTAAAGCGCCGGGC	2200002D01Rik_CCDS52172.1_ex2_7:29248158-29248180:-_5-5	2200002D01Rik	14.8127	11.4852	16.0044	12.5702	0.775356	0.785425	1.28973	1.2732
AGGCGCTGCTCACAAGCCG	2200002D01Rik_CCDS52172.1_ex2_7:29248128-29248150:-_5-4	2200002D01Rik	5.20444	5.49834	9.25876	9.31312	1.05647	1.00587	0.946547	0.994164
CTACTGCTGCTGGAGTCGG	2200002D01Rik_CCDS52172.1_ex1_7:29247927-29247949:+_5-2	2200002D01Rik	38.453	43.5992	34.0032	36.091	1.13383	1.0614	0.881966	0.942151
CCCCCATCTAGCGTGTCTC	2200002D01Rik_CCDS52172.1_ex1_7:29247955-29247977:-_5-3	2200002D01Rik	15.3738	21.2327	14.077	15.3439	1.3811	1.08999	0.724062	0.917436
GCAGCCAGCGGCATACTCC	2200002D01Rik_CCDS52172.1_ex0_7:29247716-29247738:+_5-1	2200002D01Rik	7.09386	14.4028	4.64755	8.29082	2.03032	1.78391	0.492532	0.560566
CTGCTGTTCTCCCTTAAGG	2200002J24Rik_CCDS21107.1_ex0_7:30699962-30699984:+_5-3	2200002J24Rik	14.7676	13.0066	11.9427	5.40619	0.880749	0.452679	1.1354	2.20907
CAGGGCTGGAATCGCCAGC	2200002J24Rik_CCDS21107.1_ex0_7:30699944-30699966:-_5-2	2200002J24Rik	7.99665	14.7848	13.7187	11.2388	1.84888	0.819238	0.540869	1.22065
CAGAGGTAATCCTTCGCTG	2200002J24Rik_CCDS21107.1_ex0_7:30699892-30699914:-_5-1	2200002J24Rik	6.66825	7.75081	14.5469	17.0715	1.16234	1.17355	0.86033	0.852117
CTCCAATCTCCAACAGAGT	2200002J24Rik_CCDS21107.1_ex1_7:30700256-30700278:-_5-5	2200002J24Rik	8.39646	4.1877	5.51564	7.51419	0.498746	1.36234	2.00503	0.73403
AGTTGGCTTCCCGGGTCTG	2200002J24Rik_CCDS21107.1_ex1_7:30700240-30700262:-_5-4	2200002J24Rik	26.9618	27.7925	9.39415	18.9418	1.03081	2.01633	0.97011	0.495949
GACACCTAGTACCAGCTGA	2210010C04Rik_CCDS20043.1_ex2_6:41032977-41032999:+_5-1	2210010C04Rik	7.80964	16.4709	18.8475	12.1344	2.10904	0.643816	0.474149	1.55324
GACACTCGAGAGTTGAGGG	2210010C04Rik_CCDS20043.1_ex2_6:41033024-41033046:+_5-2	2210010C04Rik	8.56412	11.1954	13.7903	12.6812	1.30724	0.919569	0.76497	1.08747
GTTTGCATTATAGTTGGGG	2210010C04Rik_CCDS20043.1_ex2_6:41033089-41033111:+_5-3	2210010C04Rik	13.336	8.30404	16.7689	16.2315	0.622677	0.967951	1.60597	1.03311
AGGCGCACCTGAATTCGGC	2210010C04Rik_CCDS20043.1_ex2_6:41033177-41033199:+_5-4	2210010C04Rik	23.0088	22.102	22.7898	23.5381	0.96059	1.03284	1.04103	0.968205
TACGATTTGTAGCAGTGAG	2210010C04Rik_CCDS20043.1_ex3_6:41034240-41034262:+_5-5	2210010C04Rik	11.3305	2.31723	8.31104	15.4945	0.204512	1.86432	4.88969	0.536387
ACGGCGGGACGCCCTACAC	2210016F16Rik_CCDS49282.1_ex3_13:58384868-58384890:-_5-4	2210016F16Rik	9.87962	11.1361	8.76499	6.32547	1.12718	0.721674	0.887171	1.38567
TCGAGCGCGCGGTTGACGG	2210016F16Rik_CCDS49282.1_ex3_13:58384828-58384850:+_5-3	2210016F16Rik	20.6293	25.2107	21.9774	19.7659	1.22208	0.899375	0.818276	1.11188
CTCACTGTGGCGTAGTAGG	2210016F16Rik_CCDS49282.1_ex2_13:58384369-58384391:+_5-2	2210016F16Rik	16.3281	10.0296	19.5165	18.9814	0.614253	0.97258	1.62799	1.02819
TATATCCCGCACCTGCTCG	2210016F16Rik_CCDS49282.1_ex2_13:58384347-58384369:+_5-1	2210016F16Rik	39.1882	33.529	38.3436	39.1262	0.85559	1.02041	1.16878	0.979998
CACGAGCTCAACCCGCGCG	2210016F16Rik_CCDS49282.1_ex3_13:58384983-58385005:-_5-5	2210016F16Rik	9.25411	16.7211	9.872	13.3389	1.80689	1.35119	0.553438	0.74009
GAATTGGCACGCTGTCGCG	2210016L21Rik_CCDS19576.1_ex0_5:114942273-114942295:+_5-1	2210016L21Rik	28.1547	27.7727	32.5537	24.9805	0.986431	0.767361	1.01376	1.30317
GACCCCGCAGCCAAGCCGC	2210016L21Rik_CCDS19576.1_ex1_5:114945807-114945829:+_5-4	2210016L21Rik	16.9794	22.135	13.8859	14.8446	1.30363	1.06904	0.767087	0.935416
GAGAGACCCGAAGCCGGTA	2210016L21Rik_CCDS19576.1_ex0_5:114942339-114942361:+_5-3	2210016L21Rik	5.17865	4.899	9.21894	10.8268	0.946001	1.1744	1.05708	0.851496
AGGCGGCTACGCCCGCCTG	2210016L21Rik_CCDS19576.1_ex0_5:114942292-114942314:+_5-2	2210016L21Rik	5.01098	8.29087	5.50768	7.87873	1.65454	1.4305	0.604398	0.699056
CTTCCTTCTTATGGCCTCC	2210016L21Rik_CCDS19576.1_ex4_5:114947189-114947211:-_5-5	2210016L21Rik	9.64747	7.90887	10.8994	20.7882	0.819787	1.90729	1.21983	0.524305
GCTTGTAGAACTTACCGGT	2210018M11Rik_CCDS40028.1_ex10_7:98621375-98621397:+_5-2	2210018M11Rik	2.41868	3.35784	6.73415	6.72171	1.3883	0.998153	0.720306	1.00185
AGCCACACGACCTAAGGAT	2210018M11Rik_CCDS40028.1_ex9_7:98619413-98619435:+_5-1	2210018M11Rik	4.90136	19.158	11.5445	15.3835	3.90872	1.33255	0.255838	0.750443
GTTGTTATAACTGCGTCCC	2210018M11Rik_CCDS40028.1_ex12_7:98630257-98630279:-_5-4	2210018M11Rik	7.04872	10.1943	3.85911	5.16845	1.44626	1.33928	0.691439	0.746667
GACATGACCACGGACGGTG	2210018M11Rik_CCDS40028.1_ex12_7:98630144-98630166:+_5-3	2210018M11Rik	9.04776	10.214	6.63061	9.87578	1.1289	1.48942	0.885817	0.671401
CTTCAGAGTGGTCCATCGA	2210018M11Rik_CCDS40028.1_ex14_7:98641627-98641649:-_5-5	2210018M11Rik	18.0048	46.5037	11.648	19.6312	2.58286	1.68537	0.387168	0.59334
TGCCAACGCGTATCTGACC	2210404J11Rik_CCDS28410.1_ex2_17:15059871-15059893:+_6-4	2210404J11Rik	10.9501	16.4379	24.8764	16.5802	1.50117	0.666503	0.666146	1.50037
CTAAGACACAGGCAATGGG	2210404J11Rik_CCDS28410.1_ex2_17:15059910-15059932:+_6-6	2210404J11Rik	14.8063	12.0318	25.3383	19.0844	0.812614	0.753185	1.2306	1.3277
AAGTTCTAGTTGTGCTCCG	2210404J11Rik_CCDS28410.1_ex2_17:15059836-15059858:+_6-3	2210404J11Rik	18.7399	20.0406	19.7634	14.9556	1.06941	0.756731	0.935098	1.32147
TAGGCTTGCAGAAGGATAC	2210404J11Rik_CCDS37451.1_ex12_17:15056776-15056798:+_6-1	2210404J11Rik	4.43062	4.20087	3.81929	3.31404	0.948146	0.867712	1.05469	1.15246
CTGCAAAGAGGCGGTGACC	2210404J11Rik_CCDS28410.1_ex2_17:15059889-15059911:-_6-5	2210404J11Rik	5.08837	20.2513	7.88098	10.1531	3.97993	1.28831	0.251261	0.77621
GGAGTGCCTGTGCTATAAA	2210404J11Rik_CCDS28410.1_ex1_17:15059423-15059445:+_6-2	2210404J11Rik	9.17673	11.3666	6.6784	10.7792	1.23863	1.61404	0.807341	0.619563
TTGGCGCACCAGACACGAT	2210404O07Rik_CCDS35998.1_ex1_10:81393868-81393890:-_5-4	2210404O07Rik	2.37354	5.3271	6.17666	5.36657	2.24437	0.868846	0.445559	1.15095
GAGGATGAAGACTATAAAC	2210404O07Rik_CCDS35998.1_ex1_10:81393839-81393861:-_5-3	2210404O07Rik	1	1	1	1	1	1	1	1
GAAGCCCACTACTGCAGCC	2210404O07Rik_CCDS35998.1_ex1_10:81393818-81393840:-_5-2	2210404O07Rik	14.7096	13.0131	16.1477	16.4851	0.884672	1.02089	1.13036	0.979535
GAGGAGGCTACATTCAGAA	2210404O07Rik_CCDS35998.1_ex2_10:81394097-81394119:+_5-5	2210404O07Rik	4.21137	6.44016	5.07762	5.20015	1.52923	1.02413	0.653922	0.976437
AAGCCTTGGCTAGTAGGCC	2210404O07Rik_CCDS35998.1_ex1_10:81393800-81393822:+_5-1	2210404O07Rik	8.39001	7.94839	7.83319	13.8303	0.947364	1.7656	1.05556	0.566381
AATGGTACAAAGCTTGATA	2210404O09Rik_CCDS57051.1_ex0_17:21880762-21880784:-_4-2	2210404O09Rik	1.81896	2.17234	2.72821	1	1.19427	0.366541	0.837331	2.72821
TTGGATATTTACATGCTCG	2210404O09Rik_CCDS57051.1_ex0_17:21881011-21881033:+_4-4	2210404O09Rik	7.59039	10.2074	15.2637	9.69351	1.34478	0.63507	0.743614	1.57463
ACCTTCTAAAACTAACCTC	2210404O09Rik_CCDS57051.1_ex0_17:21880931-21880953:-_4-3	2210404O09Rik	2.62503	1	1.00796	3.25064	0.380948	3.22496	2.62503	0.310081
ACCTAGTACTTGAGCAAAA	2210407C18Rik_CCDS24736.1_ex2_11:58612101-58612123:-_5-3	2210407C18Rik	7.54525	1	9.44194	4.0352	0.132534	0.42737	7.54525	2.33989
TACAAGCTACGTGTGAAAA	2210407C18Rik_CCDS24736.1_ex3_11:58612591-58612613:-_5-5	2210407C18Rik	1.73513	4.97145	3.81929	1.78456	2.86517	0.467248	0.349019	2.14019
TATCAAAACCTATGTGCCT	2210407C18Rik_CCDS24736.1_ex2_11:58612069-58612091:-_5-2	2210407C18Rik	5.85574	10.6816	13.5833	11.746	1.82413	0.864743	0.548206	1.15641
CAGCTATAAGAGGTTAGAC	2210407C18Rik_CCDS24736.1_ex3_11:58612545-58612567:+_5-4	2210407C18Rik	1.81251	2.0011	1.7327	1.9906	1.10404	1.14885	0.905761	0.870439
TGCTCACCGGTGCAGCACT	2210407C18Rik_CCDS24736.1_ex2_11:58612001-58612023:+_5-1	2210407C18Rik	8.44805	12.3875	17.0476	20.4316	1.46631	1.1985	0.681984	0.834376
TCGACGATTCTTAGTAAAC	2210408I21Rik_CCDS49316.1_ex2_13:77192756-77192778:+_5-2	2210408I21Rik	1	1	1.44599	1	1	0.691568	1	1.44599
ACAGAATGTATGGAAGTCC	2210408I21Rik_CCDS49316.1_ex2_13:77192678-77192700:-_5-1	2210408I21Rik	7.04227	17.4851	11.6002	8.94858	2.48288	0.771415	0.402757	1.29632
GCTGAAGTAATGCCACATC	2210408I21Rik_CCDS49316.1_ex8_13:77267685-77267707:-_5-5	2210408I21Rik	7.82899	11.6762	7.65798	6.40472	1.4914	0.836345	0.670511	1.19568
AGCAACGTATGTCTCTCAG	2210408I21Rik_CCDS49316.1_ex6_13:77262091-77262113:+_5-4	2210408I21Rik	10.9694	7.40833	8.89242	11.7698	0.675362	1.32358	1.48069	0.755528
GAATCATCTCGGCATGCCA	2210408I21Rik_CCDS49316.1_ex6_13:77261935-77261957:-_5-3	2210408I21Rik	14.716	20.1525	11.2339	17.7768	1.36943	1.58243	0.730232	0.631939
TCAGCGAATCTCCACAAGA	2300002M23Rik_CCDS50092.1_ex1_17:35567980-35568002:+_5-2	2300002M23Rik	9.38953	12.3743	11.425	5.60431	1.31788	0.490531	0.758794	2.03861
GGCTTCCTCTGCACGGCTC	2300002M23Rik_CCDS50092.1_ex1_17:35568182-35568204:+_5-4	2300002M23Rik	10.4148	6.50602	13.2328	9.24972	0.624687	0.698997	1.6008	1.43062
CTCAGGCAACCTTCACTAG	2300002M23Rik_CCDS50092.1_ex1_17:35568198-35568220:+_5-5	2300002M23Rik	7.45497	8.89021	13.8859	11.1358	1.19252	0.801952	0.83856	1.24696
ACTCATTATTCACAGGGTC	2300002M23Rik_CCDS50092.1_ex1_17:35567938-35567960:-_5-1	2300002M23Rik	1.0129	12.1372	11.0348	9.63804	11.9826	0.873425	0.083454	1.14492
GCCTCTGGAAAGGTATGGC	2300002M23Rik_CCDS50092.1_ex1_17:35568147-35568169:-_5-3	2300002M23Rik	4.11464	4.70142	10.0711	9.33689	1.14261	0.927098	0.875191	1.07864
GCTCCATGGGCAGCTAGAC	2300005B03Rik_CCDS37103.1_ex1_15:74743412-74743434:+_5-4	2300005B03Rik	9.58299	12.0055	19.1263	13.2834	1.25279	0.694513	0.798219	1.43986
GCAATGATGACACAGTGGG	2300005B03Rik_CCDS37103.1_ex1_15:74743389-74743411:+_5-3	2300005B03Rik	13.2715	11.5971	12.3568	12.8793	0.873833	1.04228	1.14438	0.959432
TCCTCCAAATCCCTTGCAC	2300005B03Rik_CCDS37103.1_ex1_15:74743442-74743464:+_5-5	2300005B03Rik	6.81657	11.9001	7.48277	8.23535	1.74576	1.10057	0.572817	0.908616
TGACGAAGATGTGCTACAG	2300005B03Rik_CCDS37103.1_ex0_15:74743079-74743101:-_5-1	2300005B03Rik	12.3236	10.8331	8.27918	9.97088	0.879055	1.20433	1.13759	0.830336
AAAGCTGATGGGAGAACCT	2300005B03Rik_CCDS37103.1_ex0_15:74743116-74743138:+_5-2	2300005B03Rik	9.13159	9.52248	3.47683	4.55824	1.04281	1.31103	0.958951	0.762758
CGGCCAATTGAAGTGCGAC	2300009A05Rik_CCDS52830.1_ex1_9:63399008-63399030:+_5-4	2300009A05Rik	6.21041	1	3.70779	1	0.16102	0.269702	6.21041	3.70779
CGTTGTGGACCGCACTGTA	2300009A05Rik_CCDS52830.1_ex1_9:63399040-63399062:+_5-5	2300009A05Rik	9.22187	15.0944	16.1875	10.2641	1.6368	0.634074	0.610948	1.5771
CGCTTCTTCACCGCGCTCA	2300009A05Rik_CCDS52830.1_ex1_9:63398888-63398910:-_5-1	2300009A05Rik	14.3742	16.7014	15.7336	18.3949	1.1619	1.16915	0.860662	0.85532
ACTACCACGTCCTGCGCAC	2300009A05Rik_CCDS52830.1_ex1_9:63398974-63398996:-_5-2	2300009A05Rik	27.5099	28.1613	18.1467	23.1498	1.02368	1.27571	0.976869	0.78388
GGTAGTTGGCGCCCAGCAC	2300009A05Rik_CCDS52830.1_ex1_9:63398989-63399011:+_5-3	2300009A05Rik	15.9735	13.1185	22.8535	33.7215	0.821269	1.47555	1.21763	0.677712
CTGCAATCCCTATAGCAGT	2310002J15Rik_CCDS50526.1_ex0_2:25239217-25239239:-_5-2	2310002J15Rik	8.02889	14.1525	10.764	6.30962	1.7627	0.586179	0.567311	1.70596
CAGCATAAGTCAGTCCCGA	2310002J15Rik_CCDS50526.1_ex0_2:25239188-25239210:+_5-1	2310002J15Rik	8.79627	10.3194	14.2921	10.8505	1.17316	0.759199	0.852401	1.31718
CTGGGATACATGTTCCTGC	2310002J15Rik_CCDS50526.1_ex0_2:25239341-25239363:+_5-5	2310002J15Rik	10.7631	12.4797	15.8291	17.9512	1.15949	1.13406	0.862449	0.881789
CTTGATACCTTTGGGCCCA	2310002J15Rik_CCDS50526.1_ex0_2:25239288-25239310:+_5-3	2310002J15Rik	24.7628	37.2568	22.8774	40.3387	1.50454	1.76326	0.664653	0.567131
TACAAACTACTGAAGCCCC	2310002J15Rik_CCDS50526.1_ex0_2:25239305-25239327:-_5-4	2310002J15Rik	1.00645	3.31174	5.3484	9.76483	3.29052	1.82575	0.303903	0.54772
CTGCTGAAACACGGCTCCA	2310002L09Rik_CCDS18285.1_ex2_4:73950591-73950613:-_5-5	2310002L09Rik	7.90637	7.63884	17.3105	8.97235	0.966163	0.51832	1.03502	1.92931
GTTATACGCTAGTTCAGAG	2310002L09Rik_CCDS18285.1_ex1_4:73943091-73943113:+_5-2	2310002L09Rik	17.2438	5.20197	7.6978	4.0986	0.301671	0.532437	3.31487	1.87815
TTTCTAACACAAACCTAGA	2310002L09Rik_CCDS18285.1_ex1_4:73943006-73943028:+_5-1	2310002L09Rik	4.7079	1	1.69288	1	0.212409	0.590711	4.7079	1.69288
GCATCCACTTTAGACAAGG	2310002L09Rik_CCDS18285.1_ex1_4:73943209-73943231:+_5-3	2310002L09Rik	2.3026	6.9473	10.0233	9.93126	3.01715	0.990815	0.331439	1.00927
AGGTCATACCTCGAAATGC	2310002L09Rik_CCDS18285.1_ex2_4:73950572-73950594:-_5-4	2310002L09Rik	3.45044	10.3919	9.53751	14.1235	3.01175	1.48084	0.332033	0.675295
TAGACGAACTCGCGTCCGG	2310003H01Rik_CCDS49004.1_ex8_11:120378572-120378594:+_5-5	2310003H01Rik	36.1445	15.18	31.7892	4.55031	0.419981	0.14314	2.38106	6.98615
AAGATCCTCCACCACCTAG	2310003H01Rik_CCDS49004.1_ex6_11:120377114-120377136:-_5-3	2310003H01Rik	11.6336	7.45443	24.5419	3.81331	0.640766	0.15538	1.56063	6.43585
AGCCAGACGGGGCCATAGG	2310003H01Rik_CCDS49004.1_ex6_11:120376786-120376808:-_5-1	2310003H01Rik	14.4387	2.62019	4.59181	1	0.18147	0.217779	5.51056	4.59181
TGCGTGAGTATTGCCTCCC	2310003H01Rik_CCDS49004.1_ex6_11:120376918-120376940:-_5-2	2310003H01Rik	45.7786	13.0329	47.5422	11.4924	0.284694	0.241732	3.51254	4.13682
TGCCTGTCGTTGGACTCGC	2310003H01Rik_CCDS49004.1_ex7_11:120378332-120378354:-_5-4	2310003H01Rik	32.1399	31.3753	57.7203	14.8843	0.97621	0.257869	1.02437	3.87794
GCATTTCTTTATGCGGTGA	2310005G13Rik_CCDS49875.1_ex3_16:57047041-57047063:+_5-4	2310005G13Rik	4.08884	8.85069	13.0975	8.84556	2.1646	0.675364	0.46198	1.48068
TACGTGGTCCTTGCAATGC	2310005G13Rik_CCDS49875.1_ex3_16:57046982-57047004:-_5-2	2310005G13Rik	9.43467	11.0044	15.6858	13.1567	1.16638	0.838762	0.857357	1.19223
CACTATCAGGCTTTTAGGG	2310005G13Rik_CCDS49875.1_ex2_16:57045339-57045361:+_5-1	2310005G13Rik	16.2895	16.405	15.0726	19.4489	1.00709	1.29036	0.992956	0.77498
CAACACATCATCATGTACG	2310005G13Rik_CCDS49875.1_ex3_16:57046997-57047019:-_5-3	2310005G13Rik	8.84141	8.95607	9.72865	17.2617	1.01297	1.77432	0.987197	0.563597
AATTGGGGGGTAATAAGGG	2310005G13Rik_CCDS49875.1_ex4_16:57049400-57049422:+_5-5	2310005G13Rik	1	1	1.59731	3.09215	1	1.93585	1	0.516569
GTTGACTATTCTAGAGACC	2310007B03Rik_CCDS15185.1_ex4_1:93159919-93159941:-_5-5	2310007B03Rik	6.75209	5.10976	5.70678	2.10155	0.756768	0.368255	1.32141	2.71551
TCGGAGGCTCTCCTGATCG	2310007B03Rik_CCDS15185.1_ex4_1:93159829-93159851:-_5-4	2310007B03Rik	10.6792	13.6586	18.752	9.13085	1.27899	0.486928	0.78187	2.05369
TGTACATTGCAAGCACCAC	2310007B03Rik_CCDS15185.1_ex4_1:93159614-93159636:-_5-2	2310007B03Rik	4.32099	2.25796	12.6674	7.04663	0.522555	0.556281	1.91367	1.79765
GACTTTACTGGGTACAAGG	2310007B03Rik_CCDS15185.1_ex4_1:93159670-93159692:+_5-3	2310007B03Rik	13.149	7.27002	12.3727	7.39532	0.552894	0.597711	1.80866	1.67305
CGCTTCAACGTTGTGCCCG	2310007B03Rik_CCDS15185.1_ex3_1:93156106-93156128:-_5-1	2310007B03Rik	34.5065	29.0373	24.4702	27.4371	0.8415	1.12125	1.18835	0.891863
CTCCTCGTGACTGTCGGTG	2310007L24Rik_CCDS48962.1_ex3_11:106376256-106376278:-_5-5	2310007L24Rik	34.642	19.3095	23.1322	16.8972	0.557402	0.73046	1.79404	1.369
ATGGGACTGTCCAAGGGAA	2310007L24Rik_CCDS48962.1_ex1_11:106375194-106375216:-_5-1	2310007L24Rik	12.1366	7.05267	4.74312	3.55971	0.581108	0.750499	1.72085	1.33245
TTTCACCTACCGGTGGGCT	2310007L24Rik_CCDS48962.1_ex2_11:106375504-106375526:-_5-4	2310007L24Rik	17.2374	19.6717	14.2284	16.1998	1.14123	1.13856	0.876251	0.878306
ACTGTTACCTTCCTTGACC	2310007L24Rik_CCDS48962.1_ex1_11:106375235-106375257:-_5-3	2310007L24Rik	3.99212	5.58396	5.29265	7.1972	1.39875	1.35985	0.714925	0.735376
CCTCAGCATAACCGGGTCA	2310007L24Rik_CCDS48962.1_ex1_11:106375223-106375245:+_5-2	2310007L24Rik	19.0043	33.5422	14.8894	24.9171	1.76498	1.67348	0.566579	0.597558
GCACATCGTCGAGCTGCAC	2310009B15Rik_CCDS35727.1_ex2_1:138856593-138856615:-_5-2	2310009B15Rik	5.46238	15.3842	17.2149	6.85643	2.81638	0.398285	0.355065	2.51077
GAACCACATAGCCGGTAGC	2310009B15Rik_CCDS35727.1_ex1_1:138853626-138853648:+_5-1	2310009B15Rik	8.4545	12.6311	7.94469	4.28879	1.49402	0.539832	0.669337	1.85243
CCCTCGGTTCGACTTCCGA	2310009B15Rik_CCDS35727.1_ex2_1:138856705-138856727:-_5-5	2310009B15Rik	22.0222	26.6004	18.3139	14.8763	1.20789	0.812296	0.82789	1.23108
CAGTTAACTCTCGGCTCGC	2310009B15Rik_CCDS35727.1_ex2_1:138856624-138856646:+_5-3	2310009B15Rik	13.8068	24.1701	11.6958	12.4672	1.7506	1.06596	0.571234	0.938124
ACTCGTGGGGAACGCCCGA	2310009B15Rik_CCDS35727.1_ex2_1:138856660-138856682:-_5-4	2310009B15Rik	13.0265	18.618	10.7082	17.4281	1.42924	1.62754	0.699674	0.614423
CCTTGGGGATGGGTCTGGG	2310011J03Rik_CCDS24017.1_ex0_10:80319524-80319546:+_5-2	2310011J03Rik	6.64891	8.2777	4.40067	2.98913	1.24497	0.679244	0.803232	1.47223
CTCCTACCTTCCGGGGCCA	2310011J03Rik_CCDS24017.1_ex1_10:80320175-80320197:+_5-3	2310011J03Rik	9.98925	14.7651	18.0591	15.1696	1.4781	0.839995	0.676546	1.19048
GATCCTGTTTTCACTGCCC	2310011J03Rik_CCDS24017.1_ex1_10:80320192-80320214:-_5-4	2310011J03Rik	22.0157	11.5378	4.05025	8.49687	0.524072	2.09786	1.90813	0.476676
CTCTCATTCATAGCCACGT	2310011J03Rik_CCDS24017.1_ex0_10:80319453-80319475:+_5-1	2310011J03Rik	12.1237	11.3205	6.50319	15.6926	0.933749	2.41306	1.07095	0.414411
GATCCTGGAGGACGTGCGA	2310011J03Rik_CCDS24017.1_ex1_10:80320226-80320248:-_5-5	2310011J03Rik	12.5945	27.6542	2.10701	11.9521	2.19574	5.67253	0.455427	0.176288
GCATCGCGAGGCAGCAAAC	2310014L17Rik_CCDS20818.1_ex0_7:12928281-12928303:-_5-3	2310014L17Rik	11.5627	4.28649	10.0791	7.75193	0.370718	0.769112	2.69747	1.3002
TGTGCGCTTTGACCGACGC	2310014L17Rik_CCDS20818.1_ex0_7:12928329-12928351:+_5-4	2310014L17Rik	19.9393	26.7123	25.3622	23.0944	1.33968	0.910583	0.746446	1.0982
GCTTGAAAATGCCGTCGAA	2310014L17Rik_CCDS20818.1_ex0_7:12928100-12928122:-_5-1	2310014L17Rik	6.57153	5.90668	7.94469	9.06745	0.89883	1.14132	1.11256	0.876177
TCTTTCGCGGCCCGGGAGA	2310014L17Rik_CCDS20818.1_ex0_7:12928379-12928401:-_5-5	2310014L17Rik	22.9508	19.6981	16.5778	19.8135	0.858275	1.19518	1.16513	0.836691
TGTGGGCGCGCGGCACATG	2310014L17Rik_CCDS20818.1_ex0_7:12928216-12928238:-_5-2	2310014L17Rik	18.5787	6.89461	10.3897	18.5851	0.371103	1.78881	2.69467	0.559031
GAGCTGGGTGTGACCGTCG	2310022A10Rik_CCDS21026.1_ex3_7:27564705-27564727:+_5-2	2310022A10Rik	31.1404	20.5279	24.2392	20.915	0.659206	0.862859	1.51698	1.15894
CGGCGGGTCACGGCTGAGA	2310022A10Rik_CCDS21026.1_ex6_7:27574637-27574659:+_5-5	2310022A10Rik	14.6709	17.7683	20.5917	18.5138	1.21113	0.899093	0.825675	1.11223
AACTGGATCCACTCGGAAG	2310022A10Rik_CCDS21026.1_ex2_7:27564486-27564508:-_5-1	2310022A10Rik	11.6143	15.5027	12.6196	11.6826	1.3348	0.925752	0.749177	1.0802
CTGTTGTCTGACCGCCGTG	2310022A10Rik_CCDS21026.1_ex5_7:27571618-27571640:-_5-4	2310022A10Rik	49.6735	50.0866	54.6063	62.0289	1.00832	1.13593	0.991752	0.880336
GCCAAGGTGGTACACCGCC	2310022A10Rik_CCDS21026.1_ex3_7:27564753-27564775:+_5-3	2310022A10Rik	8.09983	4.10208	4.47234	8.79801	0.50644	1.9672	1.97457	0.508336
ACTTGGCAAGATGAACACT	2310022B05Rik_CCDS22773.1_ex2_8:124651394-124651416:-_5-1	2310022B05Rik	5.01743	3.39736	7.20403	3.74198	0.677111	0.519429	1.47686	1.92519
GAAATCATCGACCGCTGCC	2310022B05Rik_CCDS22773.1_ex3_8:124662961-124662983:-_5-3	2310022B05Rik	10.2472	22.5828	20.6952	11.1992	2.20381	0.541151	0.45376	1.84791
TTTCGTCCTGCTGCGCGGG	2310022B05Rik_CCDS22773.1_ex3_8:124662978-124663000:+_5-4	2310022B05Rik	8.06758	9.50931	8.17565	6.99115	1.17871	0.855119	0.848388	1.16943
GAGAAGTACGGGCCCGAGT	2310022B05Rik_CCDS22773.1_ex3_8:124663009-124663031:-_5-5	2310022B05Rik	4.42417	6.39406	13.6151	13.4736	1.44526	0.989609	0.691918	1.0105
TCCCGCACGTCCCCCGCAT	2310022B05Rik_CCDS22773.1_ex3_8:124662911-124662933:+_5-2	2310022B05Rik	25.7108	16.4116	25.7763	33.3887	0.638317	1.29532	1.56662	0.772007
CTGTGGCAGAATGGCACAA	2310030G06Rik_CCDS23170.1_ex1_9:50741295-50741317:-_5-3	2310030G06Rik	12.1431	2.54775	8.64553	5.57261	0.209811	0.644566	4.76619	1.55143
TACAACACTTGCTCATACG	2310030G06Rik_CCDS23170.1_ex0_9:50740708-50740730:+_5-1	2310030G06Rik	5.53331	4.21404	7.79337	6.22245	0.761577	0.798428	1.31307	1.25246
GCTCAATGTGGGTCTTGGG	2310030G06Rik_CCDS23170.1_ex1_9:50741334-50741356:+_5-4	2310030G06Rik	24.8789	21.3841	28.0461	23.6887	0.85953	0.844636	1.16343	1.18394
TCCAGAAGAAAAGCAAAAC	2310030G06Rik_CCDS23170.1_ex2_9:50742260-50742282:-_5-5	2310030G06Rik	4.56604	1	4.4166	3.78161	0.219008	0.856226	4.56604	1.16792
GCTGTTGTCTCATAGTCCT	2310030G06Rik_CCDS23170.1_ex0_9:50740732-50740754:+_5-2	2310030G06Rik	9.12514	9.11414	13.4957	13.6718	0.998794	1.01305	1.00121	0.987119
CGCGTACCAGGTGAGGTCG	2310033P09Rik_CCDS24764.1_ex0_11:59208563-59208585:-_5-2	2310033P09Rik	21.0162	33.3314	21.2766	11.54	1.58599	0.54238	0.630523	1.84373
ACTCGCTGATGGCGCCAGT	2310033P09Rik_CCDS24764.1_ex0_11:59208525-59208547:+_5-1	2310033P09Rik	15.4189	24.2689	21.181	14.4722	1.57397	0.683261	0.635336	1.46357
CCCACCGGCCTGAGCAAGG	2310033P09Rik_CCDS24764.1_ex1_11:59208844-59208866:+_5-5	2310033P09Rik	12.7234	22.3326	25.5613	18.4742	1.75523	0.722742	0.569725	1.38362
TGTACCGGCCCGAGCCGTG	2310033P09Rik_CCDS24764.1_ex0_11:59208599-59208621:+_5-3	2310033P09Rik	20.3907	9.70031	21.0536	23.3796	0.475722	1.11048	2.10207	0.900509
CAGTGGTTACAAGAACGTG	2310033P09Rik_CCDS24764.1_ex1_11:59208816-59208838:+_5-4	2310033P09Rik	9.66037	3.20636	5.34043	8.52064	0.331909	1.5955	3.01288	0.626764
GATAGTCGGTTAGGATCAG	2310035C23Rik_CCDS15206.1_ex8_1:105695482-105695504:+_5-5	2310035C23Rik	14.5226	14.4094	13.4558	4.83561	0.992209	0.359368	1.00785	2.78266
AACCGAGTACGACGTCGGG	2310035C23Rik_CCDS15206.1_ex0_1:105664600-105664622:+_5-3	2310035C23Rik	11.2854	14.7782	13.6151	10.5573	1.3095	0.775411	0.76365	1.28964
CCTATTGGGCTGATCGAAA	2310035C23Rik_CCDS15206.1_ex7_1:105693157-105693179:-_5-4	2310035C23Rik	12.5429	20.5477	13.0656	10.4701	1.6382	0.801352	0.610426	1.24789
CATCGATTGACAATCGGGC	2310035C23Rik_CCDS15206.1_ex0_1:105664372-105664394:-_5-1	2310035C23Rik	18.5206	15.7069	13.9655	15.2329	0.848074	1.09075	1.17914	0.916798
AGAAGTAATCGCGCAGTCG	2310035C23Rik_CCDS15206.1_ex0_1:105664480-105664502:-_5-2	2310035C23Rik	8.19011	9.36441	2.57689	5.94508	1.14338	2.30707	0.874599	0.433449
CGATGGGCTGAGTCGGGAC	2310036O22Rik_CCDS22490.1_ex0_8:85026970-85026992:+_5-1	2310036O22Rik	13.8519	18.2689	14.4036	12.483	1.31887	0.866663	0.758224	1.15385
CGGGAACGTCACCCGAGAG	2310036O22Rik_CCDS22490.1_ex0_8:85026989-85027011:+_5-2	2310036O22Rik	1	1	1	1	1	1	1	1
CCGGTGGATCGGGTCGCTG	2310036O22Rik_CCDS22490.1_ex0_8:85027148-85027170:-_5-4	2310036O22Rik	22.2866	27.3183	12.2055	13.7352	1.22577	1.12533	0.815813	0.88863
GCTCGAGTCCGGTGTCCAG	2310036O22Rik_CCDS22490.1_ex0_8:85027028-85027050:+_5-3	2310036O22Rik	6.17172	9.26562	3.90689	5.00995	1.5013	1.28234	0.666088	0.779827
TCCTTACGAAGCTGAGCGT	2310036O22Rik_CCDS22490.1_ex0_8:85027220-85027242:-_5-5	2310036O22Rik	8.80272	15.3644	4.27324	9.36859	1.74542	2.19239	0.572929	0.456124
CCTGCCTCGGTGACCCTGG	2310039H08Rik_CCDS28841.1_ex0_17:46772890-46772912:+_5-1	2310039H08Rik	12.4719	9.14707	9.23487	5.47751	0.733413	0.593134	1.36349	1.68596
GACGCGGTGGGTTCACCGT	2310039H08Rik_CCDS28841.1_ex0_17:46772979-46773001:-_5-4	2310039H08Rik	26.5233	23.2612	23.2995	15.6054	0.877011	0.669776	1.14024	1.49304
ACCGTGGGTCGCAGTGATG	2310039H08Rik_CCDS28841.1_ex0_17:46772965-46772987:-_5-3	2310039H08Rik	7.91282	11.1624	12.9621	10.0026	1.41068	0.771681	0.708879	1.29587
CGAGGGAGCAGAGACGCGG	2310039H08Rik_CCDS28841.1_ex0_17:46772991-46773013:-_5-5	2310039H08Rik	13.5553	18.7036	10.1985	9.41614	1.3798	0.923285	0.724743	1.08309
GCCCTTCTGTACCAGGTGC	2310039H08Rik_CCDS28841.1_ex0_17:46772917-46772939:-_5-2	2310039H08Rik	5.49462	14.2316	12.1975	16.4534	2.59009	1.34891	0.386087	0.741338
CACGCCTCTTCTTACGACC	2310042D19Rik_CCDS51406.1_ex0_4:156217538-156217560:-_5-2	2310042D19Rik	8.11917	13.7771	10.7321	8.75838	1.69686	0.816091	0.589322	1.22535
CAAGTTGCCGGCCCTGGAA	2310042D19Rik_CCDS51406.1_ex0_4:156217380-156217402:-_5-1	2310042D19Rik	21.5257	19.4281	22.3358	19.6708	0.902553	0.880686	1.10797	1.13548
ACGAAGCTATGTCAGACTG	2310042D19Rik_CCDS51406.1_ex0_4:156217934-156217956:-_5-4	2310042D19Rik	9.06066	13.9813	17.5414	16.2236	1.54308	0.924871	0.648055	1.08123
TCCAAGCCTCAACCCGACG	2310042D19Rik_CCDS51406.1_ex0_4:156217888-156217910:+_5-3	2310042D19Rik	12.6847	23.5444	14.4991	15.3439	1.85612	1.05826	0.538758	0.944945
CCCGCCTCTAGGTCGCAAC	2310042D19Rik_CCDS51406.1_ex0_4:156218164-156218186:+_5-5	2310042D19Rik	20.0554	23.36	23.2517	27.9364	1.16477	1.20148	0.858536	0.832307
CTAGCGCGACCACTTGGCG	2310044G17Rik_CCDS56849.1_ex0_12:86952873-86952895:+_5-1	2310044G17Rik	26.7877	30.3479	25.7285	16.7307	1.13291	0.65028	0.882686	1.5378
CCAAAATAGCCCCCCACCC	2310044G17Rik_CCDS56849.1_ex2_12:86961954-86961976:+_5-4	2310044G17Rik	11.208	10.5763	18.7042	14.3454	0.943634	0.766961	1.05973	1.30385
GACCATAGGGGGCAGCGTG	2310044G17Rik_CCDS56849.1_ex1_12:86960393-86960415:-_5-2	2310044G17Rik	21.3967	27.6015	20.6315	18.8546	1.28999	0.913874	0.775201	1.09424
GTATCGAAGAAACTCTGCA	2310044G17Rik_CCDS56849.1_ex2_12:86962016-86962038:+_5-5	2310044G17Rik	4.25006	1	4.91833	6.0164	0.235291	1.22326	4.25006	0.817488
GTCGTCATGAAGAGCGTGC	2310044G17Rik_CCDS56849.1_ex1_12:86960411-86960433:+_5-3	2310044G17Rik	6.57798	3.33808	10.5012	17.8323	0.507464	1.69812	1.97058	0.588885
ATGTTCCTGTAGCCGGTAC	2310045N01Rik_CCDS52568.1_ex1_8:70141919-70141941:-_5-2	2310045N01Rik	15.9154	13.3951	23.0526	9.55879	0.841644	0.414652	1.18815	2.41166
CAGGGCGCCATATACACCG	2310045N01Rik_CCDS52568.1_ex2_8:70142503-70142525:+_5-4	2310045N01Rik	14.974	10.8068	7.40313	4.34427	0.721705	0.586815	1.38561	1.70411
CAGGCTGACATGCAGAGAT	2310045N01Rik_CCDS52568.1_ex2_8:70142470-70142492:+_5-3	2310045N01Rik	14.7096	10.247	8.27918	7.33192	0.696619	0.885585	1.43551	1.1292
CTTGCCAACGAGCCGTCAG	2310045N01Rik_CCDS52568.1_ex1_8:70141895-70141917:+_5-1	2310045N01Rik	6.00406	12.4072	10.1667	10.2086	2.06647	1.00413	0.483916	0.995891
CACCTGCAGGCGTACTCCA	2310045N01Rik_CCDS52568.1_ex2_8:70142520-70142542:-_5-5	2310045N01Rik	13.1361	12.0977	3.13438	6.43642	0.920946	2.05349	1.08584	0.486976
TCAGTCCGGACGCTGTCCG	2310047M10Rik_CCDS36190.1_ex0_11:69059908-69059930:+_5-1	2310047M10Rik	13.9164	15.1997	8.55792	3.78953	1.09222	0.44281	0.915568	2.25831
ATCGCCCATGGGCCGGAGC	2310047M10Rik_CCDS36190.1_ex0_11:69060001-69060023:+_5-2	2310047M10Rik	16.8827	21.911	22.8296	15.7718	1.29784	0.690851	0.770512	1.44749
GGCCCCTGACGGCGTCGCC	2310047M10Rik_CCDS36190.1_ex0_11:69060049-69060071:-_5-3	2310047M10Rik	20.4617	30.0515	30.9131	26.7715	1.46868	0.866022	0.680886	1.1547
CATTCATCTCGACGCCTCC	2310047M10Rik_CCDS36190.1_ex0_11:69060188-69060210:-_5-5	2310047M10Rik	6.20396	10.5038	9.72865	8.47309	1.69308	0.870942	0.590639	1.14818
CGACGGCAGACCCTCAGAG	2310047M10Rik_CCDS36190.1_ex0_11:69060159-69060181:-_5-4	2310047M10Rik	3.93408	6.69702	5.80235	6.93568	1.70231	1.19532	0.587437	0.836594
GGAGTTGGGCATTTCACGT	2310050C09Rik_CCDS50977.1_ex0_3:92869120-92869142:+_5-3	2310050C09Rik	16.8053	15.4434	16.4344	16.0017	0.91896	0.973668	1.08819	1.02704
TTTGGTCTGACACGGAACT	2310050C09Rik_CCDS50977.1_ex0_3:92869143-92869165:+_5-4	2310050C09Rik	8.59636	3.27222	10.4613	11.6668	0.380652	1.11523	2.62707	0.896677
GGTCGTCTGACACGGAGCT	2310050C09Rik_CCDS50977.1_ex0_3:92868945-92868967:+_5-1	2310050C09Rik	12.2398	5.5642	6.0572	7.33192	0.4546	1.21045	2.19974	0.826141
CATTTCACGTATGTCTGGC	2310050C09Rik_CCDS50977.1_ex0_3:92869099-92869121:+_5-2	2310050C09Rik	21.2161	15.5686	14.7858	20.3682	0.733808	1.37755	1.36275	0.725927
ATCTCACGTAAGTTTGAGC	2310050C09Rik_CCDS50977.1_ex0_3:92869166-92869188:+_5-5	2310050C09Rik	9.60878	11.933	5.18911	7.60929	1.24189	1.46639	0.805227	0.681945
CACAGTCTGTCATTCCAGT	2310057J18Rik_CCDS23759.1_ex4_10:28983978-28984000:+_5-2	2310057J18Rik	8.78982	5.43248	8.8526	4.26502	0.618042	0.481782	1.61801	2.07563
GGGTATACACTGACAGAAT	2310057J18Rik_CCDS23759.1_ex5_10:28986108-28986130:-_5-4	2310057J18Rik	7.46787	6.18989	9.91182	10.0898	0.828869	1.01795	1.20646	0.982365
TCATCTGATCCTTGGGTGG	2310057J18Rik_CCDS23759.1_ex3_10:28982494-28982516:+_5-1	2310057J18Rik	10.6534	22.1086	10.7401	12.9031	2.07526	1.20139	0.481868	0.832368
TGACTACATGATGGAGGAT	2310057J18Rik_CCDS23759.1_ex5_10:28986149-28986171:-_5-5	2310057J18Rik	7.46142	6.92095	8.77296	11.0645	0.927565	1.26121	1.07809	0.792892
TTGGCTGGCAGTATCAATC	2310057J18Rik_CCDS23759.1_ex5_10:28985991-28986013:-_5-3	2310057J18Rik	5.7977	11.4061	6.60672	13.0616	1.96735	1.97701	0.508298	0.505814
ACTCAGAACGCCAACCGAA	2310057M21Rik_CCDS40159.1_ex4_7:131361818-131361840:+_5-4	2310057M21Rik	5.22378	2.0011	8.18361	4.16992	0.383074	0.509545	2.61046	1.96253
CAGGCAGTCTTGCCTCGAC	2310057M21Rik_CCDS40159.1_ex4_7:131361750-131361772:+_5-3	2310057M21Rik	9.90541	5.72886	13.854	7.33192	0.578356	0.529226	1.72904	1.88955
TTTCAGACTAACCGGATCC	2310057M21Rik_CCDS40159.1_ex4_7:131361914-131361936:+_5-5	2310057M21Rik	6.28779	2.87705	5.67492	5.16845	0.457562	0.910752	2.1855	1.09799
ATGATTAGGTTTCAGCAGC	2310057M21Rik_CCDS40159.1_ex2_7:131357459-131357481:-_5-1	2310057M21Rik	6.59087	8.72556	3.82725	4.48691	1.32389	1.17236	0.755353	0.852981
TGCGCTCCAGGCGATAACC	2310057M21Rik_CCDS40159.1_ex2_7:131357493-131357515:+_5-2	2310057M21Rik	3.46979	1.00659	5.49175	8.43347	0.2901	1.53566	3.44708	0.651185
GCTGGTAGTGGTGTAGACC	2310057N15Rik_CCDS28302.1_ex0_16:88774030-88774052:+_2-2	2310057N15Rik	5.23023	5.06366	5.68289	2.81478	0.968151	0.495308	1.0329	2.01895
AGGACCTCTGGCAGCGGAT	2310057N15Rik_CCDS28302.1_ex0_16:88773852-88773874:+_2-1	2310057N15Rik	18.5077	20.4687	15.63	19.2588	1.10595	1.23216	0.904199	0.811581
GCAAGGCGGTCCCTCAAAA	2310061I04Rik_CCDS50095.1_ex4_17:35895796-35895818:+_5-2	2310061I04Rik	8.32553	3.14709	4.64755	2.87818	0.378004	0.619289	2.64547	1.61476
GAAGTCGGTGGAGTGGAGT	2310061I04Rik_CCDS50095.1_ex4_17:35896007-35896029:+_5-4	2310061I04Rik	4.33389	4.22063	8.63757	6.72171	0.973867	0.778195	1.02683	1.28503
AGGGTGGTAGTGACCGGTG	2310061I04Rik_CCDS50095.1_ex4_17:35895972-35895994:+_5-3	2310061I04Rik	9.20253	8.14598	5.88199	5.19222	0.885189	0.882732	1.1297	1.13285
TGATACCTTTCCAAGCCCC	2310061I04Rik_CCDS50095.1_ex4_17:35895759-35895781:-_5-1	2310061I04Rik	13.3489	18.3545	10.2145	10.3988	1.37498	1.01805	0.727283	0.982271
TCTACCATTCCCCCCGCTC	2310061I04Rik_CCDS50095.1_ex4_17:35896031-35896053:-_5-5	2310061I04Rik	22.8541	13.0197	16.976	19.8769	0.56969	1.17088	1.75534	0.854056
TTCTGTGGGTCAGTTGGCG	2310061N02Rik_CCDS49893.1_ex0_16:88707798-88707820:+_5-5	2310061N02Rik	37.6792	28.1876	28.1496	16.4058	0.748095	0.582808	1.33673	1.71583
GACACACTTGGACGGTAGC	2310061N02Rik_CCDS49893.1_ex0_16:88707653-88707675:+_5-2	2310061N02Rik	8.6415	1.00659	13.1452	9.93126	0.116483	0.755502	8.58496	1.32362
TGATAGCCGTGACGGAAAG	2310061N02Rik_CCDS49893.1_ex0_16:88707740-88707762:+_5-3	2310061N02Rik	4.13398	3.3776	3.42108	3.98765	0.817033	1.16561	1.22394	0.85792
TCTCCCAGAAACCGCCATC	2310061N02Rik_CCDS49893.1_ex0_16:88707766-88707788:-_5-4	2310061N02Rik	20.7454	12.5324	10.4773	13.862	0.604103	1.32305	1.65535	0.755829
TCTCCTTGACCCATAGACC	2310061N02Rik_CCDS49893.1_ex0_16:88707562-88707584:+_5-1	2310061N02Rik	7.18414	3.17343	4.01043	9.87578	0.441727	2.46253	2.26384	0.406087
CGCCGCTTGGTGACACAGG	2310067B10Rik_CCDS25646.1_ex14_11:115792419-115792441:-_5-5	2310067B10Rik	19.4234	11.1624	21.0775	10.9853	0.574689	0.521184	1.74007	1.91871
CTTGGGCTCCGTTACGGTG	2310067B10Rik_CCDS25646.1_ex10_11:115790013-115790035:+_5-3	2310067B10Rik	7.53236	18.3677	13.5833	8.81386	2.4385	0.648876	0.410087	1.54113
CCGGTCTTGCCGCCCGATG	2310067B10Rik_CCDS25646.1_ex3_11:115786236-115786258:-_5-1	2310067B10Rik	37.6341	31.2502	39.9285	29.3708	0.83037	0.735585	1.20428	1.35946
CTTCACTATGCCGTGCCGG	2310067B10Rik_CCDS25646.1_ex6_11:115788738-115788760:+_5-2	2310067B10Rik	30.0829	24.012	31.2874	25.868	0.798196	0.826786	1.25282	1.2095
GCGCTCCTGCTCGTTGGAA	2310067B10Rik_CCDS25646.1_ex12_11:115791017-115791039:-_5-4	2310067B10Rik	11.3112	27.0548	13.647	12.8397	2.39186	0.940842	0.418084	1.06288
GGCCAAAGCTGGAATGGCG	2310079G19Rik_CCDS49891.1_ex0_16:88627270-88627292:+_5-1	2310079G19Rik	18.8044	13.7903	21.9854	16.6515	0.733356	0.757389	1.36359	1.32033
AATCGGAGAGCAGACTGAA	2310079G19Rik_CCDS49891.1_ex0_16:88627343-88627365:+_5-3	2310079G19Rik	6.77143	7.01316	10.0711	7.82326	1.0357	0.776802	0.965532	1.28733
GTCTGCTCCACTGAGACAA	2310079G19Rik_CCDS49891.1_ex0_16:88627490-88627512:-_5-5	2310079G19Rik	9.25411	16.2667	15.3115	12.7208	1.75778	0.830801	0.568899	1.20366
TCCGGGATATCTGGATCCC	2310079G19Rik_CCDS49891.1_ex0_16:88627319-88627341:-_5-2	2310079G19Rik	8.4287	14.989	12.97	10.906	1.77833	0.840862	0.562326	1.18926
ACGTGGTGTGTTGCTGCCC	2310079G19Rik_CCDS49891.1_ex0_16:88627436-88627458:+_5-4	2310079G19Rik	37.9178	24.5389	31.1361	29.4263	0.647161	0.945085	1.54521	1.05811
ATCCAGTTGGTGCGTGAGC	2410002F23Rik_CCDS52228.1_ex0_7:44251035-44251057:+_5-5	2410002F23Rik	11.2532	7.96815	12.0621	7.54589	0.708081	0.625585	1.41227	1.5985
TTGCAGCGGTAGTTAAAGA	2410002F23Rik_CCDS52228.1_ex0_7:44250881-44250903:-_5-2	2410002F23Rik	5.03678	5.17562	6.20055	4.92278	1.02757	0.793926	0.973174	1.25956
GATTCCCAACGCTGACGCC	2410002F23Rik_CCDS52228.1_ex0_7:44250953-44250975:-_5-3	2410002F23Rik	4.07595	2.70581	11.6002	16.7624	0.663849	1.44501	1.50637	0.692036
TCGGTGGCCTCAAAATGCA	2410002F23Rik_CCDS52228.1_ex0_7:44250977-44250999:-_5-4	2410002F23Rik	15.1868	10.6421	10.6604	15.7084	0.700751	1.47353	1.42704	0.678645
TCATACACCCGCAGGATCC	2410002F23Rik_CCDS52228.1_ex0_7:44250791-44250813:-_5-1	2410002F23Rik	7.93861	17.7815	11.2578	18.1889	2.23988	1.61568	0.446453	0.618935
CTTACTCGACAGCCTCCAA	2410004B18Rik_CCDS17898.1_ex1_3:145938885-145938907:+_5-4	2410004B18Rik	29.7411	27.8452	35.5164	30.6229	0.936252	0.86222	1.06809	1.1598
CGGAACAGCTCGTCCGGGC	2410004B18Rik_CCDS17898.1_ex0_3:145938222-145938244:-_5-3	2410004B18Rik	26.678	12.203	37.2127	34.4031	0.457419	0.924497	2.18618	1.08167
TAGTGTAGGTCTCTGGGGG	2410004B18Rik_CCDS17898.1_ex1_3:145938937-145938959:-_5-5	2410004B18Rik	23.1313	10.405	22.9251	21.3905	0.449824	0.933059	2.22309	1.07174
CCGGAAGACGCGGGTCGCA	2410004B18Rik_CCDS17898.1_ex0_3:145938142-145938164:+_5-1	2410004B18Rik	1	1	1	1	1	1	1	1
CGGCCTCGGCTCCGACGAC	2410004B18Rik_CCDS17898.1_ex0_3:145938167-145938189:+_5-2	2410004B18Rik	19.849	21.3446	29.0734	36.9707	1.07535	1.27163	0.929932	0.786391
GGACACTCACCAACGCCTC	2410004P03Rik_CCDS49033.1_ex2_12:17011117-17011139:+_5-3	2410004P03Rik	12.6654	8.02084	12.8745	6.54736	0.633288	0.508554	1.57906	1.96636
CTGAAAGACTATGACCCTC	2410004P03Rik_CCDS49033.1_ex1_12:17008272-17008294:-_5-2	2410004P03Rik	19.8168	15.8452	17.9794	11.1121	0.799584	0.618042	1.25065	1.61801
TGTGCAACAGGACCAGCTG	2410004P03Rik_CCDS49033.1_ex2_12:17011169-17011191:-_5-5	2410004P03Rik	20.2295	14.0603	12.7391	8.93273	0.695041	0.701207	1.43876	1.42611
TTGTGGAAGCCGAAGCACG	2410004P03Rik_CCDS49033.1_ex2_12:17011140-17011162:-_5-4	2410004P03Rik	12.2269	16.5697	14.0054	12.1264	1.35518	0.865842	0.737908	1.15495
GGGGTGCTGTCTTACCAGA	2410004P03Rik_CCDS49033.1_ex1_12:17008257-17008279:+_5-1	2410004P03Rik	4.42417	10.7739	11.9267	12.6257	2.43523	1.0586	0.410639	0.94464
GGAGTCTTGGAGCCCCTCG	2410012M07Rik_CCDS52896.1_ex0_9:98865285-98865307:-_5-2	2410012M07Rik	8.4545	5.82106	10.1428	5.0892	0.688517	0.501756	1.4524	1.993
CCACCCATTTTGGACAGCC	2410012M07Rik_CCDS52896.1_ex0_9:98865304-98865326:+_5-3	2410012M07Rik	22.6155	28.5499	37.3402	31.1935	1.26241	0.835388	0.792139	1.19705
TCGGCGGGCGCTTCCAACT	2410012M07Rik_CCDS52896.1_ex0_9:98865128-98865150:-_5-1	2410012M07Rik	24.6983	10.3919	16.5937	14.6307	0.420751	0.8817	2.3767	1.13417
CTTGGAATTTCTGGAGCAC	2410012M07Rik_CCDS52896.1_ex0_9:98865452-98865474:+_5-4	2410012M07Rik	12.5622	31.3688	27.0346	25.8046	2.49707	0.954503	0.400469	1.04767
ATTGGCCTGATCATCTGGA	2410012M07Rik_CCDS52896.1_ex0_9:98865480-98865502:-_5-5	2410012M07Rik	22.7831	14.7124	14.8416	16.9447	0.645757	1.1417	1.54857	0.875884
GCTGGTGGCACAACCTCCT	2410015M20Rik_CCDS28908.1_ex2_17:56608900-56608922:+_5-3	2410015M20Rik	12.1624	4.12842	10.3419	5.23185	0.339441	0.505889	2.94602	1.97672
GCACACATATTGGCTGAAC	2410015M20Rik_CCDS28908.1_ex2_17:56608872-56608894:+_5-1	2410015M20Rik	7.91927	12.4928	12.5878	6.63454	1.57752	0.527063	0.633905	1.89731
TGAACTGGTACATTGCTGG	2410015M20Rik_CCDS28908.1_ex2_17:56608886-56608908:+_5-2	2410015M20Rik	11.6917	18.8419	20.6076	15.5499	1.61157	0.754573	0.620514	1.32525
CAGCCTCACTCTTGTCACT	2410015M20Rik_CCDS28908.1_ex2_17:56608934-56608956:+_5-5	2410015M20Rik	8.08693	8.56749	12.1179	10.1373	1.05942	0.836558	0.943909	1.19537
ACCTCCTCGGCCTTCCGCA	2410015M20Rik_CCDS28908.1_ex2_17:56608912-56608934:+_5-4	2410015M20Rik	23.6214	25.8825	17.0954	14.4008	1.09572	0.84238	0.912641	1.18711
CGTCCATCGACGTAGCGCG	2410016O06Rik_CCDS26033.1_ex0_12:83951368-83951390:-_5-5	2410016O06Rik	4.41772	15.2195	11.7754	8.88518	3.4451	0.754553	0.290267	1.32529
ACCTCGGGCGCGCTGACAC	2410016O06Rik_CCDS26033.1_ex0_12:83950983-83951005:-_5-2	2410016O06Rik	30.315	30.2886	32.052	35.7265	0.99913	1.11464	1.00087	0.897149
TCCGGACCACTTCTACCGG	2410016O06Rik_CCDS26033.1_ex0_12:83951218-83951240:+_5-4	2410016O06Rik	18.5077	21.4302	14.531	16.3345	1.15791	1.12411	0.863627	0.889589
GCTCGCACGCGGATGAGCC	2410016O06Rik_CCDS26033.1_ex0_12:83951088-83951110:+_5-3	2410016O06Rik	21.3193	29.3929	30.276	34.4823	1.3787	1.13893	0.725321	0.878016
TTCCGCTTGCCCCGAACCG	2410016O06Rik_CCDS26033.1_ex0_12:83950915-83950937:-_5-1	2410016O06Rik	24.5823	17.5378	28.1655	35.5363	0.713434	1.2617	1.40167	0.792585
GTCTGTCGATTCATCGAGC	2410018M08Rik_CCDS39292.1_ex3_5:129902219-129902241:-_5-5	2410018M08Rik	4.21137	9.10755	16.3229	15.3439	2.16261	0.940022	0.462404	1.06381
GCTGATATTCTTGATCAGG	2410018M08Rik_CCDS39292.1_ex3_5:129902156-129902178:+_5-3	2410018M08Rik	12.4074	13.0658	17.8042	17.6104	1.05306	0.989112	0.94961	1.01101
GGATGCTGCATATTGGAAG	2410018M08Rik_CCDS39292.1_ex3_5:129902199-129902221:-_5-4	2410018M08Rik	7.80964	10.6421	7.44295	7.49042	1.36269	1.00638	0.733842	0.993663
CGGACAGTGTCGTTAGATA	2410018M08Rik_CCDS39292.1_ex3_5:129902113-129902135:-_5-2	2410018M08Rik	15.4447	4.35235	6.94121	7.06248	0.281802	1.01747	3.54859	0.98283
GTATCCTTGCCGGCGAAGC	2410018M08Rik_CCDS39292.1_ex3_5:129901861-129901883:-_5-1	2410018M08Rik	11.2145	6.84192	12.309	17.967	0.610098	1.45966	1.63908	0.68509
ACGCGTCGTCATCTGCGTC	2410066E13Rik_CCDS20158.1_ex2_6:54698992-54699014:-_5-5	2410066E13Rik	19.9006	8.44894	31.5104	19.4014	0.424556	0.615713	2.3554	1.62413
GTCTGGAAGCCCCAGCAAC	2410066E13Rik_CCDS20158.1_ex2_6:54698976-54698998:-_5-4	2410066E13Rik	7.139	7.40833	11.6002	10.2482	1.03773	0.883454	0.963645	1.13192
GGCCAGCTGCAAGAAGGGC	2410066E13Rik_CCDS20158.1_ex1_6:54689032-54689054:-_5-3	2410066E13Rik	8.016	10.5499	12.8585	11.7302	1.31611	0.912249	0.759816	1.09619
TCCGGACACAGTACGTAGA	2410066E13Rik_CCDS20158.1_ex0_6:54681888-54681910:-_5-2	2410066E13Rik	12.2269	8.25794	9.08355	11.9679	0.675392	1.31754	1.48062	0.758991
ATGGACTTCTACGCCGACC	2410066E13Rik_CCDS20158.1_ex0_6:54681859-54681881:+_5-1	2410066E13Rik	10.3891	11.5839	8.98799	14.1235	1.11501	1.57137	0.896849	0.636386
TGCAGCGGGCTCGCCCACA	2410076I21Rik_CCDS52814.1_ex5_9:58741390-58741412:-_5-4	2410076I21Rik	15.8381	15.068	18.2024	15.9937	0.951381	0.878659	1.0511	1.1381
TTCATGCTCTTGGACAACG	2410076I21Rik_CCDS52814.1_ex5_9:58741440-58741462:-_5-5	2410076I21Rik	15.4705	15.9374	18.521	19.6708	1.03018	1.06208	0.970704	0.941546
TTGAAGATTGTAAGACGCA	2410076I21Rik_CCDS52814.1_ex3_9:58665862-58665884:-_5-2	2410076I21Rik	4.12109	2.71899	3.5724	4.31257	0.659774	1.20719	1.51567	0.82837
ACCTGATACAACGATCGTG	2410076I21Rik_CCDS52814.1_ex4_9:58712048-58712070:+_5-3	2410076I21Rik	15.0255	29.169	16.092	21.2241	1.94129	1.31893	0.515121	0.758193
ACGGTGACGTACTGGGCCA	2410076I21Rik_CCDS52814.1_ex2_9:58660267-58660289:+_5-1	2410076I21Rik	15.2254	12.3875	12.9222	23.0072	0.813602	1.78043	1.2291	0.561661
TGCGGTGAGCCTTATCAAG	2410089E03Rik_CCDS49578.1_ex10_15:8187276-8187298:-_5-2	2410089E03Rik	25.1175	15.4895	22.957	19.8293	0.616683	0.86376	1.62158	1.15773
ATTGCAATTTTGCGCGGTA	2410089E03Rik_CCDS49578.1_ex15_15:8201346-8201368:+_5-4	2410089E03Rik	20.3585	8.43577	11.6241	10.2641	0.414361	0.883001	2.41335	1.1325
ACCATTAGTGGATGTCGCC	2410089E03Rik_CCDS49578.1_ex1_15:8174842-8174864:-_5-1	2410089E03Rik	10.7308	25.1844	12.3727	12.277	2.34692	0.992263	0.426091	1.0078
TACAGTCATGCGGCACGTC	2410089E03Rik_CCDS49578.1_ex23_15:8216332-8216354:+_5-5	2410089E03Rik	22.1834	16.9187	16.4026	22.6347	0.762675	1.37995	1.31117	0.724664
GCCGGTCTACTTTCATCAG	2410089E03Rik_CCDS49578.1_ex10_15:8187440-8187462:-_5-3	2410089E03Rik	12.8266	15.5093	17.6051	24.6872	1.20915	1.40228	0.827026	0.713127
TGCTATGGATGCGCTCATG	2410124H12Rik_CCDS57040.1_ex0_16:92478947-92478969:+_5-5	2410124H12Rik	15.7671	20.7453	13.6311	10.1452	1.31573	0.744273	0.760034	1.34359
AGTGGACAGAACCTCGTGG	2410124H12Rik_CCDS57040.1_ex0_16:92478899-92478921:-_5-3	2410124H12Rik	10.6212	13.9879	12.3568	11.7936	1.31698	0.954421	0.759314	1.04776
GGCGGAGCAAGTAGCGCTC	2410124H12Rik_CCDS57040.1_ex0_16:92478882-92478904:-_5-2	2410124H12Rik	12.9491	3.58177	4.52809	4.52654	0.276604	0.999657	3.61528	1.00034
TGTCGATTGGCTTGGAGAA	2410124H12Rik_CCDS57040.1_ex0_16:92478853-92478875:+_5-1	2410124H12Rik	11.6723	13.4412	8.40661	8.79801	1.15155	1.04656	0.868395	0.955513
ACCTCTTGGGGACTCCAGC	2410124H12Rik_CCDS57040.1_ex0_16:92478924-92478946:-_5-4	2410124H12Rik	16.8376	19.2436	11.194	18.3395	1.1429	1.63832	0.874968	0.61038
CGCGCCTTACCCGTAGTAG	2410127L17Rik_CCDS29689.1_ex0_19:18671191-18671213:-_5-1	2410127L17Rik	21.0098	19.2963	14.531	20.5822	0.918445	1.41643	1.0888	0.705998
AAGTAAATATTCTGGTACC	2410127L17Rik_CCDS29689.1_ex3_19:18690240-18690262:+_5-5	2410127L17Rik	1	4.57628	2.89545	4.81976	4.57628	1.66459	0.218518	0.600747
CCAGCATCTACATTTGACA	2410127L17Rik_CCDS29689.1_ex2_19:18679121-18679143:+_5-4	2410127L17Rik	6.66181	22.1152	8.32697	18.0938	3.3197	2.17292	0.301232	0.460211
TTCACTCGTTCATGCATGC	2410127L17Rik_CCDS29689.1_ex1_19:18677690-18677712:-_5-2	2410127L17Rik	8.59636	13.3227	6.78193	21.7868	1.54981	3.21247	0.645242	0.311287
GGATCTTGTCCAAGTGAAG	2410127L17Rik_CCDS29689.1_ex1_19:18677773-18677795:-_5-3	2410127L17Rik	3.04418	5.1361	3.2618	11.1834	1.68719	3.42859	0.592703	0.291665
AGTGCCGGAACTCTGTCCA	2410131K14Rik_CCDS39237.1_ex1_5:118255778-118255800:+_5-4	2410131K14Rik	17.0375	6.30185	14.8018	11.4053	0.369882	0.770534	2.70357	1.2978
TTCAGGCTATGTCTGCGAG	2410131K14Rik_CCDS39237.1_ex2_5:118258970-118258992:+_5-5	2410131K14Rik	1	1	1	1	1	1	1	1
GGTTAAACTGCACCTTCCA	2410131K14Rik_CCDS39237.1_ex1_5:118255730-118255752:-_5-3	2410131K14Rik	5.66873	1	2.553	3.27442	0.176406	1.28258	5.66873	0.77968
CTGTTCCCGGTCTTGAACC	2410131K14Rik_CCDS39237.1_ex1_5:118255702-118255724:-_5-2	2410131K14Rik	22.1834	11.1295	5.66696	9.26557	0.501704	1.63502	1.99321	0.611615
AAGTCGCTTACCTGCTTGA	2410131K14Rik_CCDS39237.1_ex0_5:118245448-118245470:-_5-1	2410131K14Rik	6.21686	4.73435	1	2.06192	0.761534	2.06192	1.31314	0.484984
GGAAGGCTTCGTCCTCTGC	2410137M14Rik_CCDS50104.1_ex2_17:36978755-36978777:+_5-5	2410137M14Rik	11.5046	13.1119	15.2079	7.33192	1.13971	0.482111	0.877418	2.07421
CCAGCAGTGATCCCCGTGA	2410137M14Rik_CCDS50104.1_ex1_17:36978500-36978522:+_5-1	2410137M14Rik	17.792	26.8375	22.0571	19.5837	1.5084	0.887864	0.662952	1.1263
ATTTATGCTCTTCTCCTGA	2410137M14Rik_CCDS50104.1_ex2_17:36978710-36978732:+_5-4	2410137M14Rik	2.88297	7.77057	10.3419	12.7366	2.69533	1.23156	0.371012	0.811979
TCCCACCACACCCATCACG	2410137M14Rik_CCDS50104.1_ex1_17:36978512-36978534:-_5-2	2410137M14Rik	26.5362	25.3095	16.8167	25.5193	0.953774	1.5175	1.04847	0.658978
TCATCCTGAAATGGAGTAA	2410137M14Rik_CCDS50104.1_ex2_17:36978650-36978672:-_5-3	2410137M14Rik	2.55409	11.6959	3.66797	6.72171	4.57928	1.83254	0.218375	0.54569
GCGGCAGTTAGTCAGGTCG	2510002D24Rik_CCDS28029.1_ex1_16:18836819-18836841:-_5-3	2510002D24Rik	12.1817	15.6739	8.77296	7.75986	1.28668	0.88452	0.777197	1.13056
TACGTCCACGGCAAGCGGC	2510002D24Rik_CCDS28029.1_ex1_16:18836780-18836802:+_5-1	2510002D24Rik	21.6417	13.54	16.5539	15.019	0.625645	0.907279	1.59835	1.1022
GGAGCCACTGCCTGCAATC	2510002D24Rik_CCDS28029.1_ex1_16:18836799-18836821:-_5-2	2510002D24Rik	6.2362	9.06804	7.81726	7.55381	1.4541	0.966299	0.687713	1.03488
AGCGAGCAGGTTCGGGTCC	2510002D24Rik_CCDS28029.1_ex2_16:18839104-18839126:+_5-5	2510002D24Rik	11.5562	14.4753	13.3364	19.1637	1.25259	1.43695	0.798344	0.695921
TCCCTCTGTGAGAGCGAGC	2510002D24Rik_CCDS28029.1_ex2_16:18839092-18839114:+_5-4	2510002D24Rik	14.8643	7.66519	3.08659	10.6286	0.515677	3.44349	1.9392	0.290403
GAAACCGCCCGGACCTACC	2510003E04Rik_CCDS23890.1_ex5_10:62575088-62575110:-_5-1	2510003E04Rik	14.7741	9.38417	10.6764	9.2418	0.635179	0.865631	1.57436	1.15523
GTGAACCACATCGACACGG	2510003E04Rik_CCDS23890.1_ex6_10:62578062-62578084:-_5-3	2510003E04Rik	14.6838	15.3249	15.4708	13.8461	1.04366	0.894986	0.958165	1.11734
GCCGAGCGACAGGCGGTAG	2510003E04Rik_CCDS23890.1_ex6_10:62577990-62578012:+_5-2	2510003E04Rik	4.30165	7.48736	6.08906	7.46664	1.74058	1.22624	0.574521	0.815501
CGAGCCGGCTGCTGACGAT	2510003E04Rik_CCDS23890.1_ex6_10:62578183-62578205:-_5-5	2510003E04Rik	13.5037	15.0812	11.648	15.0824	1.11682	1.29485	0.895399	0.772292
GTGGAACTCGACCACCGCG	2510003E04Rik_CCDS23890.1_ex6_10:62578089-62578111:+_5-4	2510003E04Rik	11.0146	7.73763	9.87996	14.2186	0.702491	1.43913	1.4235	0.694863
TAGTTGTCGATGAAGAGAT	2510009E07Rik_CCDS28062.1_ex0_16:21653553-21653575:+_5-2	2510009E07Rik	1.0129	2.55433	2.98306	1	2.52181	0.335226	0.396541	2.98306
GAGAGTGACACTCCGAAAC	2510009E07Rik_CCDS28062.1_ex0_16:21653420-21653442:-_5-1	2510009E07Rik	4.10174	3.20636	9.95961	4.54239	0.781707	0.456081	1.27925	2.19259
TACAGTACCTTGGCGAGTC	2510009E07Rik_CCDS28062.1_ex0_16:21653581-21653603:+_5-3	2510009E07Rik	9.25411	8.33039	11.5684	5.8896	0.900182	0.509114	1.11089	1.9642
CTTACAGTGACACCATCCC	2510009E07Rik_CCDS28062.1_ex1_16:21694210-21694232:+_5-4	2510009E07Rik	22.0996	12.776	13.6231	8.35422	0.578112	0.61324	1.72977	1.63068
AGATGGACAGCCCGTCGCA	2510009E07Rik_CCDS28062.1_ex1_16:21694281-21694303:+_5-5	2510009E07Rik	25.7688	34.2074	17.5335	26.0424	1.32747	1.4853	0.753311	0.673266
ATAGACGTGGGGTCGGCCT	2510039O18Rik_CCDS18925.1_ex0_4:147941609-147941631:-_5-3	2510039O18Rik	10.6276	8.44894	17.3025	9.12293	0.794996	0.527261	1.25787	1.8966
TGTGGACCGGCCCGAGTAG	2510039O18Rik_CCDS18925.1_ex0_4:147941759-147941781:-_5-5	2510039O18Rik	14.9224	21.3117	19.3652	16.8655	1.42817	0.870916	0.700196	1.14822
AACGCGGCCACGCGCTCCG	2510039O18Rik_CCDS18925.1_ex0_4:147941656-147941678:-_5-4	2510039O18Rik	16.7666	15.7003	10.0074	14.5276	0.9364	1.45169	1.06792	0.688852
CGAAGTCCGGCGTCACGGC	2510039O18Rik_CCDS18925.1_ex0_4:147941370-147941392:-_5-1	2510039O18Rik	14.1034	7.76398	12.1577	20.9626	0.550504	1.72422	1.81652	0.579971
GCGGGCGTAGCTGCACGAA	2510039O18Rik_CCDS18925.1_ex0_4:147941394-147941416:-_5-2	2510039O18Rik	19.733	12.0582	9.02781	16.4296	0.611066	1.81989	1.63648	0.549484
CTGTTTCAGGGAGTACGAT	2510049J12Rik_CCDS51877.1_ex2_6:115589382-115589404:-_5-4	2510049J12Rik	6.7005	7.07243	6.97307	4.75636	1.05551	0.682104	0.94741	1.46605
TTGGAATCACTAACACACG	2510049J12Rik_CCDS51877.1_ex2_6:115589344-115589366:-_5-3	2510049J12Rik	8.04179	9.12073	17.2069	12.4196	1.13417	0.721782	0.881705	1.38546
CGCGGCATACAGCGAGACG	2510049J12Rik_CCDS51877.1_ex1_6:115586760-115586782:-_5-1	2510049J12Rik	4.2823	4.64214	11.7595	11.9362	1.08403	1.01503	0.922483	0.985193
TAAGGAACGTCCCTCGCGT	2510049J12Rik_CCDS51877.1_ex3_6:115592274-115592296:+_5-5	2510049J12Rik	20.7712	27.0812	18.736	24.4733	1.30379	1.30621	0.766997	0.765571
TGTATAATTACAGTGCACG	2510049J12Rik_CCDS51877.1_ex1_6:115586777-115586799:-_5-2	2510049J12Rik	2.65082	9.27221	5.79438	9.00405	3.49786	1.55393	0.285889	0.643531
CAATCCGCGGTCCCGCTCA	2610002J02Rik_CCDS57317.1_ex1_4:155250580-155250602:-_5-1	2610002J02Rik	26.7425	26.2645	21.4598	12.6653	0.982125	0.590189	1.0182	1.69437
CCACAGTGAAGGCCTCAGG	2610002J02Rik_CCDS57317.1_ex2_4:155250786-155250808:-_5-4	2610002J02Rik	18.6819	15.5027	17.8759	10.7713	0.829827	0.602559	1.20507	1.65959
GCTTTTGGACACACCTGGC	2610002J02Rik_CCDS57317.1_ex1_4:155250643-155250665:-_5-3	2610002J02Rik	14.1356	10.1811	29.3362	21.026	0.720243	0.716724	1.38842	1.39524
ACCTGTTCTGTGAACCTGA	2610002J02Rik_CCDS57317.1_ex2_4:155250870-155250892:+_5-5	2610002J02Rik	7.70647	5.14928	12.0382	9.89163	0.668176	0.821685	1.49661	1.21701
CGGTTCGGGGTCCAATCCG	2610002J02Rik_CCDS57317.1_ex1_4:155250592-155250614:-_5-2	2610002J02Rik	16.915	13.8298	26.5966	33.1906	0.817609	1.24793	1.22308	0.80133
GCAGGTGTAGTTAAATCTA	2610002M06Rik_CCDS53171.1_ex4_X:107793125-107793147:-_5-2	2610002M06Rik	2.76045	1	4.95019	2.0857	0.36226	0.421337	2.76045	2.3734
AGGAGTATGAACCTTGAGA	2610002M06Rik_CCDS53171.1_ex4_X:107793092-107793114:-_5-1	2610002M06Rik	1	1	2.33797	1	1	0.427722	1	2.33797
TTCTTGAGAATGAGTGCTA	2610002M06Rik_CCDS53171.1_ex5_X:107793555-107793577:-_5-5	2610002M06Rik	4.39192	6.36772	5.40414	3.1397	1.44987	0.58098	0.689718	1.72123
TTCAAACTGCAGTAACAAT	2610002M06Rik_CCDS53171.1_ex5_X:107793512-107793534:-_5-3	2610002M06Rik	2.5283	1.01976	1.83623	1.53096	0.403337	0.833753	2.47931	1.1994
AGTGCTAGGGTTGATGCTG	2610002M06Rik_CCDS53171.1_ex5_X:107793543-107793565:-_5-4	2610002M06Rik	19.4879	12.9209	20.9899	25.139	0.663023	1.19767	1.50824	0.834954
ATCGCATGGATTTGAGCCG	2610008E11Rik_CCDS35965.1_ex2_10:79088321-79088343:-_5-3	2610008E11Rik	10.4729	21.3578	18.29	11.6985	2.03934	0.639609	0.490354	1.56345
CGTTATGCACTAACCTGGA	2610008E11Rik_CCDS35965.1_ex3_10:79092397-79092419:+_5-4	2610008E11Rik	5.53331	11.6037	13.1134	9.72521	2.09706	0.741625	0.476857	1.34839
TCCGAATTCACAGCACACC	2610008E11Rik_CCDS35965.1_ex0_10:79067953-79067975:-_5-1	2610008E11Rik	11.395	9.70031	22.0571	16.6039	0.851276	0.752772	1.17471	1.32842
CCTCGCTTTGGAGCCTCCC	2610008E11Rik_CCDS35965.1_ex2_10:79088286-79088308:-_5-2	2610008E11Rik	22.8089	19.8101	17.7326	15.3518	0.868522	0.865742	1.15138	1.15508
CGTGAATTTGGGCCATGGA	2610008E11Rik_CCDS35965.1_ex3_10:79092442-79092464:-_5-5	2610008E11Rik	11.9818	9.06145	8.22343	12.6653	0.756265	1.54015	1.32229	0.649288
TCTCGCAAAGGAGCAAACT	2610015P09Rik_CCDS57030.1_ex7_16:43939018-43939040:+_5-5	2610015P09Rik	14.3162	6.74971	10.6047	5.0575	0.471473	0.476911	2.12101	2.09683
AAGGATCCTCGTCTTACCA	2610015P09Rik_CCDS57030.1_ex3_16:43906927-43906949:+_5-2	2610015P09Rik	5.19154	5.19538	12.1258	8.29875	1.00074	0.684385	0.999261	1.46117
TCAAATGGTCATGGGCGTC	2610015P09Rik_CCDS57030.1_ex2_16:43905444-43905466:-_5-1	2610015P09Rik	16.5023	23.3073	18.6803	14.8684	1.41237	0.795941	0.70803	1.25637
CATACACGATCCCGGAAGT	2610015P09Rik_CCDS57030.1_ex6_16:43931316-43931338:+_5-4	2610015P09Rik	14.9224	12.618	11.417	10.5018	0.845575	0.91984	1.18263	1.08715
TTAAGACGCGAGAAACAAC	2610015P09Rik_CCDS57030.1_ex4_16:43908426-43908448:+_5-3	2610015P09Rik	1.01935	5.40614	1.81234	3.97973	5.30354	2.19591	0.188553	0.455392
TAAAGTCTCCAATAAGAGT	2610018G03Rik_CCDS40968.1_ex5_X:50886762-50886784:-_5-4	2610018G03Rik	1.0129	2.6663	1.78845	1	2.63235	0.559145	0.379889	1.78845
TATACCTTTAATGTCTCGG	2610018G03Rik_CCDS40968.1_ex3_X:50885681-50885703:-_5-1	2610018G03Rik	4.81753	3.45664	11.6002	8.33837	0.717512	0.718812	1.3937	1.39118
CAAAACGGAGTCCCTACGA	2610018G03Rik_CCDS40968.1_ex4_X:50885880-50885902:-_5-3	2610018G03Rik	56.9732	48.6574	61.5032	56.3389	0.85404	0.916032	1.17091	1.09166
GATCGATCGATTTAAGAGA	2610018G03Rik_CCDS40968.1_ex6_X:50887937-50887959:+_5-5	2610018G03Rik	6.96489	7.09878	5.77049	11.2468	1.01922	1.94901	0.981139	0.51308
GAACAAGGTGATGTTAAAC	2610018G03Rik_CCDS40968.1_ex4_X:50885806-50885828:+_5-2	2610018G03Rik	2.50251	1	1	2.26797	0.399599	2.26797	2.50251	0.440923
CACAGTCAAGTCCAAAGAG	2610020H08Rik_CCDS21787.1_ex5_7:119818445-119818467:-_5-1	2610020H08Rik	6.30714	3.52908	3.60426	1.00792	0.559538	0.279648	1.78719	3.57592
AAGTAACGAATACCTGGTA	2610020H08Rik_CCDS21787.1_ex6_7:119819539-119819561:-_5-4	2610020H08Rik	3.38595	2.68606	3.38923	2.16495	0.793293	0.638773	1.26057	1.5655
GTGGGCCATTGCCTAGACT	2610020H08Rik_CCDS21787.1_ex7_7:119823855-119823877:+_5-5	2610020H08Rik	5.01743	8.35673	11.0348	7.65684	1.66554	0.693883	0.600406	1.44116
TTTAGTGCCTTACATCCAT	2610020H08Rik_CCDS21787.1_ex6_7:119819426-119819448:+_5-2	2610020H08Rik	5.8106	8.0406	9.91182	9.77276	1.38378	0.98597	0.722658	1.01423
AATCCAGAATCTTGAGATC	2610020H08Rik_CCDS21787.1_ex6_7:119819516-119819538:-_5-3	2610020H08Rik	2.85718	1	6.13684	6.92775	0.349996	1.12888	2.85718	0.885834
ACTCGCCTTTTAGACATGG	2610028H24Rik_CCDS35945.1_ex5_10:76457487-76457509:+_5-5	2610028H24Rik	5.69453	7.29636	4.28917	2.27589	1.28129	0.530614	0.780461	1.88461
TGCGGTAGCTGCTGAATGA	2610028H24Rik_CCDS35945.1_ex4_10:76454724-76454746:-_5-3	2610028H24Rik	25.7559	28.4247	33.3501	32.4773	1.10362	0.973829	0.906108	1.02687
GAGAAATCTGTGCAATCAG	2610028H24Rik_CCDS35945.1_ex4_10:76454753-76454775:-_5-4	2610028H24Rik	7.66133	11.9857	9.08355	8.91688	1.56444	0.981651	0.639205	1.01869
CCATGCATCCTCCAGGCAT	2610028H24Rik_CCDS35945.1_ex3_10:76452815-76452837:-_5-1	2610028H24Rik	8.09983	21.72	23.5702	29.4025	2.68154	1.24744	0.37292	0.801641
GGATCATCCAGCACCCGGT	2610028H24Rik_CCDS35945.1_ex3_10:76452931-76452953:+_5-2	2610028H24Rik	17.6436	18.2096	12.2692	15.8432	1.03208	1.2913	0.968919	0.774416
CCTCATGTCATCTTACAGT	2610034B18Rik_CCDS21390.1_ex3_7:79929568-79929590:-_5-4	2610034B18Rik	14.4323	5.32052	11.4967	6.95945	0.368654	0.605345	2.71257	1.65195
CTCTGTCAATTCCAGCAGC	2610034B18Rik_CCDS21390.1_ex2_7:79928289-79928311:+_5-3	2610034B18Rik	18.4884	24.6377	18.521	15.1379	1.3326	0.817334	0.750411	1.22349
GGTCATGGAACTCGAACTG	2610034B18Rik_CCDS21390.1_ex2_7:79928215-79928237:-_5-1	2610034B18Rik	3.32792	11.0373	11.8073	10.9536	3.31658	0.927695	0.301516	1.07794
GGGGTCAAACTTACGCCTG	2610034B18Rik_CCDS21390.1_ex3_7:79929645-79929667:+_5-5	2610034B18Rik	13.6004	10.2931	14.8814	15.1933	0.756819	1.02096	1.32132	0.979471
CATCCAGAATGCCACCGCC	2610034B18Rik_CCDS21390.1_ex2_7:79928253-79928275:+_5-2	2610034B18Rik	14.6838	16.6487	17.7326	18.9893	1.13382	1.07087	0.881977	0.933818
CCGTGAAAAATCGTTACCA	2610034M16Rik_CCDS37673.1_ex10_17:58974944-58974966:-_5-5	2610034M16Rik	12.4461	14.5872	5.50768	4.98618	1.17203	0.905314	0.853221	1.10459
TTTACTCAGTCCGTCCCAC	2610034M16Rik_CCDS37673.1_ex10_17:58973774-58973796:-_5-3	2610034M16Rik	12.1366	15.2129	23.5065	22.3019	1.25347	0.948752	0.797783	1.05402
ACCCCAATATATTGACTAA	2610034M16Rik_CCDS37673.1_ex10_17:58973705-58973727:+_5-2	2610034M16Rik	1	1	1	1	1	1	1	1
GACTCACAGGGTTCATCCG	2610034M16Rik_CCDS37673.1_ex10_17:58974470-58974492:+_5-4	2610034M16Rik	5.5849	1.94841	3.95468	4.01935	0.34887	1.01635	2.8664	0.98391
TTCGGAACTAGAATGCTGC	2610034M16Rik_CCDS37673.1_ex10_17:58973558-58973580:+_5-1	2610034M16Rik	6.57798	4.2338	9.08355	9.71729	0.643633	1.06977	1.55368	0.934783
GTGAGCGGCCCAAAGGCGA	2610301B20Rik_CCDS17961.1_ex0_4:10874693-10874715:+_5-1	2610301B20Rik	8.22235	3.97694	8.25529	3.95595	0.483675	0.479202	2.06751	2.0868
AAGATTTTCTGTCAAAGTC	2610301B20Rik_CCDS17961.1_ex1_4:10879587-10879609:-_5-2	2610301B20Rik	6.76498	3.30515	9.26673	6.30962	0.488568	0.68089	2.0468	1.46867
CATGCAAGGCGTCAGTAAA	2610301B20Rik_CCDS17961.1_ex2_4:10881847-10881869:+_5-4	2610301B20Rik	18.1015	9.10097	9.03577	6.69793	0.502775	0.741269	1.98896	1.34904
GTGTCAGAGCTCCCATGCA	2610301B20Rik_CCDS17961.1_ex2_4:10881834-10881856:+_5-3	2610301B20Rik	9.71196	11.0834	8.17565	14.3929	1.14121	1.76046	0.876262	0.568033
TGGAACAAATACTTCACAG	2610301B20Rik_CCDS17961.1_ex3_4:10882451-10882473:+_5-5	2610301B20Rik	5.98471	14.1196	7.21996	14.2186	2.35928	1.96934	0.423858	0.507783
GCCGCATACAACCCAGGCC	2610301G19Rik_CCDS49534.1_ex16_14:70151605-70151627:-_5-5	2610301G19Rik	5.52687	10.3392	12.3488	8.96443	1.87071	0.725933	0.534556	1.37754
GCAACGATAGAACTCCTCC	2610301G19Rik_CCDS49534.1_ex11_14:70143467-70143489:+_5-2	2610301G19Rik	13.9809	7.09878	12.5798	9.28142	0.507749	0.737804	1.96948	1.35537
CACCACCCAAGTCGGATCC	2610301G19Rik_CCDS49534.1_ex12_14:70143668-70143690:-_5-3	2610301G19Rik	28.129	41.2216	29.1451	24.8854	1.46545	0.853844	0.682383	1.17117
GTAACTGCCGGGGCGGCCC	2610301G19Rik_CCDS49534.1_ex9_14:70142478-70142500:+_5-1	2610301G19Rik	21.4934	27.0153	22.9809	21.6441	1.25691	0.941831	0.795601	1.06176
AACGCAAACAGCGGGCTGG	2610301G19Rik_CCDS49534.1_ex13_14:70145921-70145943:-_5-4	2610301G19Rik	6.36517	8.0406	5.25283	7.24475	1.26322	1.37921	0.791629	0.725053
GCACATTTTCAATGAGCAT	2610305D13Rik_CCDS59663.1_ex0_4:147613969-147613991:-_4-4	2610305D13Rik	2.89587	5.9001	4.91833	3.09215	2.03742	0.628698	0.490817	1.59059
AGGTTTGAAGATTGAAGAG	2610305D13Rik_CCDS59663.1_ex0_4:147613852-147613874:+_4-2	2610305D13Rik	2.73465	2.93633	1.4221	1	1.07375	0.703187	0.931317	1.4221
TTATGAGGTGTACTTTGGG	2610305D13Rik_CCDS59663.1_ex0_4:147613891-147613913:+_4-3	2610305D13Rik	8.50608	14.2448	3.25384	2.84648	1.67465	0.874807	0.597138	1.14311
TTGACTGATCTCGAAAGAT	2610318N02Rik_CCDS37269.1_ex3_16:17118446-17118468:+_5-2	2610318N02Rik	7.75161	13.8035	12.8187	11.4687	1.78073	0.894682	0.561569	1.11772
CGGAGAGAGTCGTGCGGAA	2610318N02Rik_CCDS37269.1_ex5_16:17121342-17121364:-_5-4	2610318N02Rik	16.8827	8.25794	16.8724	15.962	0.489136	0.946042	2.04442	1.05704
TTGGATCGCAACCCAGCAC	2610318N02Rik_CCDS37269.1_ex5_16:17121364-17121386:-_5-5	2610318N02Rik	22.5574	20.4555	18.8635	18.5534	0.906819	0.983565	1.10276	1.01671
CGGGGCATAGTGTAGACAG	2610318N02Rik_CCDS37269.1_ex3_16:17118328-17118350:+_5-1	2610318N02Rik	22.4929	11.9396	8.65349	11.0724	0.530816	1.27953	1.88389	0.781535
TAAACCAGTGCAATGACAT	2610318N02Rik_CCDS37269.1_ex4_16:17121027-17121049:-_5-3	2610318N02Rik	6.64246	4.06915	7.65798	9.89163	0.612596	1.29168	1.6324	0.774188
ATCCGGGACTGGCGGCTAA	2610507B11Rik_CCDS25097.1_ex16_11:78272812-78272834:+_5-4	2610507B11Rik	9.75065	15.6937	10.8755	15.2726	1.6095	1.40431	0.62131	0.712092
GACAATTCGTTGGCGACTC	2610507B11Rik_CCDS25097.1_ex9_11:78266952-78266974:-_5-2	2610507B11Rik	7.71292	7.81667	7.17217	10.5335	1.01345	1.46867	0.986727	0.680889
ACGTCGACGGGAGCATGGC	2610507B11Rik_CCDS25097.1_ex16_11:78272863-78272885:-_5-5	2610507B11Rik	9.82158	8.56749	11.0348	18.6248	0.872312	1.68783	1.14638	0.592478
GAAGCTTCGAAGCGGCAGT	2610507B11Rik_CCDS25097.1_ex8_11:78266649-78266671:-_5-1	2610507B11Rik	15.0836	14.3106	10.1985	18.3632	0.948755	1.80058	1.05401	0.555377
ATAGAGACGACGAGAGCGC	2610507B11Rik_CCDS25097.1_ex15_11:78272154-78272176:-_5-3	2610507B11Rik	1.0129	4.2799	1.3982	4.43937	4.22541	3.17505	0.236663	0.314956
GAGCTGGACAGGTTGCACA	2610524H06Rik_CCDS39225.1_ex0_5:114822669-114822691:-_5-2	2610524H06Rik	13.8519	13.382	11.7276	7.86288	0.966074	0.670458	1.03512	1.49152
TGCTGCGGAGGCAGAGCCT	2610524H06Rik_CCDS39225.1_ex1_5:114823312-114823334:-_5-4	2610524H06Rik	2.12204	3.33808	3.30162	2.94158	1.57305	0.890949	0.635707	1.1224
CCGCAGCACCTCGTAGGAC	2610524H06Rik_CCDS39225.1_ex1_5:114823325-114823347:+_5-5	2610524H06Rik	8.57057	13.3095	14.523	14.0442	1.55293	0.967032	0.643943	1.03409
TAAAGCCTCCAAGGGTCAC	2610524H06Rik_CCDS39225.1_ex0_5:114822602-114822624:+_5-1	2610524H06Rik	1	1	1	1	1	1	1	1
ATACCCAGGAAACCACACA	2610528A11Rik_CCDS56949.1_ex0_14:37102678-37102700:-_5-1	2610528A11Rik	7.5646	6.57189	4.58384	1.90343	0.868768	0.415247	1.15105	2.4082
CAGCTTGGATCTAGGAGAT	2610528A11Rik_CCDS56949.1_ex1_14:37107386-37107408:+_5-4	2610528A11Rik	13.9035	8.7058	14.9372	14.6782	0.626159	0.982664	1.59704	1.01764
CGCCTGAGTTTCAAGGACT	2610528A11Rik_CCDS56949.1_ex1_14:37107417-37107439:+_5-5	2610528A11Rik	9.38953	9.04828	2.25833	3.21895	0.963656	1.42537	1.03771	0.701573
CCTTTCCAGGTTGTCAGCT	2610528A11Rik_CCDS56949.1_ex1_14:37107372-37107394:+_5-3	2610528A11Rik	32.0561	37.428	18.1547	30.4644	1.16758	1.67805	0.856474	0.59593
TGAGGTCACTTACCTTTCC	2610528A11Rik_CCDS56949.1_ex1_14:37107360-37107382:+_5-2	2610528A11Rik	5.79126	14.3962	8.15176	14.4167	2.48586	1.76854	0.402276	0.565439
GTAACTGGCATGGTATCGG	2610528J11Rik_CCDS18554.1_ex1_4:118529624-118529646:-_5-2	2610528J11Rik	15.5285	6.5192	12.4922	8.76631	0.419821	0.701743	2.38197	1.42502
GTGGGAACCGCCCACCGGT	2610528J11Rik_CCDS18554.1_ex1_4:118529673-118529695:+_5-5	2610528J11Rik	1	1	1	1	1	1	1	1
AGCGGGCGATGCCTGTAAC	2610528J11Rik_CCDS18554.1_ex1_4:118529638-118529660:-_5-3	2610528J11Rik	8.53188	10.0296	6.4793	6.59491	1.17555	1.01784	0.850669	0.982469
CGCCCGCTGTCCAGTGCAG	2610528J11Rik_CCDS18554.1_ex1_4:118529651-118529673:+_5-4	2610528J11Rik	16.5152	16.5565	22.1287	23.8472	1.0025	1.07766	0.997503	0.927938
CTCTCCATTCTCATCGCGC	2610528J11Rik_CCDS18554.1_ex1_4:118529582-118529604:+_5-1	2610528J11Rik	10.647	13.1251	14.4593	18.2127	1.23275	1.25958	0.811193	0.793915
TTATTATCTCCAATAATAA	2700029M09Rik_CCDS52553.1_ex2_8:60895602-60895624:-_5-4	2700029M09Rik	1	1	1	1	1	1	1	1
AGTGACCTTCGAAAAGAAG	2700029M09Rik_CCDS52553.1_ex1_8:60893754-60893776:+_5-1	2700029M09Rik	1	1	1	1.03962	1	1.03962	1	0.961886
TTACCTGAAATACCCCATG	2700029M09Rik_CCDS52553.1_ex2_8:60895633-60895655:-_5-5	2700029M09Rik	9.47981	20.8507	7.6978	8.70291	2.19948	1.13057	0.454653	0.884509
GAACTGTAATCTTCACTGG	2700029M09Rik_CCDS52553.1_ex2_8:60895551-60895573:+_5-3	2700029M09Rik	5.62359	2.04061	8.53403	10.3433	0.362866	1.21201	2.75584	0.825075
CATTTTATGTTTCCCAGCA	2700029M09Rik_CCDS52553.1_ex2_8:60895510-60895532:-_5-2	2700029M09Rik	7.139	12.9473	5.53157	7.37947	1.8136	1.33406	0.55139	0.749589
GTACAGGGGCAAACCTGCG	2700049A03Rik_CCDS49081.1_ex7_12:71154821-71154843:-_5-2	2700049A03Rik	15.6962	7.98132	9.54547	7.54589	0.508488	0.79052	1.96662	1.26499
CATCATTATACTTCGGCAC	2700049A03Rik_CCDS49081.1_ex9_12:71158889-71158911:-_5-3	2700049A03Rik	7.67422	18.394	16.2194	14.0442	2.39686	0.865892	0.417213	1.15488
TGCGGTGGCCCTGATAAAC	2700049A03Rik_CCDS49081.1_ex13_12:71164447-71164469:-_5-5	2700049A03Rik	22.8412	9.63445	21.2368	20.0037	0.421802	0.941937	2.37078	1.06164
TTACACTTTTCTTGGACGC	2700049A03Rik_CCDS49081.1_ex1_12:71139711-71139733:-_5-1	2700049A03Rik	5.28827	12.1108	4.95019	6.26207	2.29013	1.26502	0.436656	0.790504
GAAGCTATCGTTCGTGCAA	2700049A03Rik_CCDS49081.1_ex10_12:71160340-71160362:+_5-4	2700049A03Rik	17.102	1.00659	6.46337	12.8317	0.0588579	1.9853	16.9901	0.503702
CATGTTAACGGGATCGTAC	2700050L05Rik_CCDS21932.2_ex8_7:133648276-133648298:+_5-5	2700050L05Rik	18.3014	2.15258	16.5141	7.64891	0.117618	0.463176	8.50209	2.15901
TGAGACGTAAGCTAACTGC	2700050L05Rik_CCDS21932.2_ex7_7:133647444-133647466:-_5-4	2700050L05Rik	2.01887	8.52797	7.52259	5.90545	4.22414	0.785029	0.236735	1.27384
TACGAGAGAGTGCCAAACT	2700050L05Rik_CCDS21932.2_ex1_7:133639039-133639061:+_5-2	2700050L05Rik	13.1039	10.5565	14.7301	14.3533	0.805602	0.97442	1.24131	1.02625
ATACGCCATGCCGAAACTA	2700050L05Rik_CCDS21932.2_ex2_7:133640674-133640696:-_5-3	2700050L05Rik	9.5314	11.7157	5.8342	11.5479	1.22917	1.97935	0.81356	0.505217
GTGCAAACGCTGTTCGAGG	2700050L05Rik_CCDS21932.2_ex1_7:133638973-133638995:-_5-1	2700050L05Rik	3.45689	17.7157	4.78294	10.7158	5.12474	2.24042	0.195132	0.446345
TCCTTTCAAGATTCAGGAT	2700060E02Rik_CCDS26839.1_ex5_14:19819965-19819987:-_5-4	2700060E02Rik	11.5111	10.7607	4.05025	1.95098	0.934809	0.481693	1.06974	2.07601
GTTCAGGAACGTCTAACAC	2700060E02Rik_CCDS26839.1_ex2_14:19814569-19814591:-_5-1	2700060E02Rik	3.99856	3.43029	1.86012	1.00792	0.85788	0.541859	1.16566	1.8455
TGGCCCAAGTTCTTTGAAA	2700060E02Rik_CCDS26839.1_ex6_14:19822565-19822587:-_5-5	2700060E02Rik	8.35132	5.27441	2.81581	2.03815	0.631566	0.723823	1.58336	1.38155
TAGCTGTTAGACTTGAATA	2700060E02Rik_CCDS26839.1_ex5_14:19819915-19819937:-_5-3	2700060E02Rik	6.41031	4.49725	1	1	0.701564	1	1.42539	1
TGACACCCGCCTTAAAATC	2700060E02Rik_CCDS26839.1_ex3_14:19816243-19816265:+_5-2	2700060E02Rik	4.35323	11.8803	2.29815	2.33137	2.72908	1.01446	0.366424	0.985751
ACCATTTGTACTCTGACCG	2700062C07Rik_CCDS29101.1_ex3_18:24475671-24475693:-_5-5	2700062C07Rik	20.4488	24.6509	13.3762	12.2928	1.2055	0.919009	0.829535	1.08813
CCGAAGACGCCAAAGAGAA	2700062C07Rik_CCDS29101.1_ex3_18:24475632-24475654:+_5-4	2700062C07Rik	1	1	1	1	1	1	1	1
ATACAGAAACTTCTTAATC	2700062C07Rik_CCDS29101.1_ex2_18:24473053-24473075:+_5-2	2700062C07Rik	1	1	1	1	1	1	1	1
CTCTACAAGTGTGCTGGTA	2700062C07Rik_CCDS29101.1_ex2_18:24473133-24473155:+_5-3	2700062C07Rik	10.4471	5.88034	1	1.84003	0.562869	1.84003	1.77661	0.54347
CTACAGTTCGACACACGGT	2700062C07Rik_CCDS29101.1_ex1_18:24471067-24471089:+_5-1	2700062C07Rik	8.6415	13.764	3.81929	8.02138	1.59277	2.10023	0.627835	0.476139
CTCAGTGGCACCTCGGCGC	2700081O15Rik_CCDS29524.2_ex2_19:7421309-7421331:+_5-3	2700081O15Rik	22.8089	24.9999	22.3278	17.1587	1.09606	0.768488	0.912359	1.30126
GGTAGGGGGGTACTCCCCC	2700081O15Rik_CCDS29524.2_ex1_19:7420103-7420125:-_5-1	2700081O15Rik	4.59828	8.46211	9.90386	8.66329	1.84028	0.874739	0.543396	1.1432
CGCCTCGCAGCCTCCCGAA	2700081O15Rik_CCDS29524.2_ex2_19:7421331-7421353:+_5-4	2700081O15Rik	23.3893	7.57298	14.5947	14.5435	0.32378	0.996491	3.08852	1.00352
CCAGCGGCGAGGGGTCCGA	2700081O15Rik_CCDS29524.2_ex2_19:7421285-7421307:+_5-2	2700081O15Rik	19.3203	11.8079	18.6723	18.7357	0.611165	1.00339	1.63622	0.996617
TCATGGACTACGACCCACG	2700081O15Rik_CCDS29524.2_ex2_19:7421437-7421459:+_5-5	2700081O15Rik	14.284	10.0757	8.8287	14.916	0.705387	1.68948	1.41766	0.591897
CGCCTTCTTCGAGCTGGCC	2700089E24Rik_CCDS51934.1_ex0_6:133105517-133105539:+_3-2	2700089E24Rik	34.6613	38.8506	44.9299	40.7667	1.12086	0.907339	0.892169	1.10212
AAGAAGGCGAGCAGGGTGC	2700089E24Rik_CCDS51934.1_ex0_6:133105505-133105527:-_3-1	2700089E24Rik	6.0105	1	1	1	0.166375	1	6.0105	1
AAGTTCATGCGCAGCTGCC	2700089E24Rik_CCDS51934.1_ex0_6:133105535-133105557:-_3-3	2700089E24Rik	14.2388	17.3929	14.5629	15.8273	1.22151	1.08683	0.818656	0.920109
TCACTTGCACAGGTAGCTC	2700094K13Rik_CCDS16187.1_ex1_2:84670304-84670326:+_5-2	2700094K13Rik	18.8173	8.39625	11.8232	3.21102	0.446199	0.271586	2.24115	3.68207
AACCCGTCCAAACCGCGGA	2700094K13Rik_CCDS16187.1_ex1_2:84670284-84670306:-_5-1	2700094K13Rik	10.4987	9.88472	8.00044	4.0352	0.94152	0.504372	1.06211	1.98266
GGCCTCCAGTTGCAGAGCC	2700094K13Rik_CCDS16187.1_ex1_2:84670326-84670348:+_5-3	2700094K13Rik	19.6943	13.652	19.8351	12.2532	0.693196	0.617755	1.44259	1.61876
TGGTCATTGAGCATTGGTG	2700094K13Rik_CCDS16187.1_ex2_2:84670477-84670499:-_5-5	2700094K13Rik	15.9025	14.9495	13.9894	9.87578	0.940068	0.705946	1.06375	1.41654
GTACGAGCTGACGCGTGTA	2700094K13Rik_CCDS16187.1_ex1_2:84670370-84670392:-_5-4	2700094K13Rik	7.5517	6.65751	11.5365	10.8347	0.88159	0.939166	1.13431	1.06477
GTGCTTTGCTCGGAACATC	2700097O09Rik_CCDS25912.1_ex6_12:55062999-55063021:-_5-5	2700097O09Rik	14.1808	16.9648	17.1432	14.4722	1.19633	0.844192	0.835893	1.18456
TTGATACATTATGTGAGGA	2700097O09Rik_CCDS25912.1_ex5_12:55061111-55061133:-_5-4	2700097O09Rik	4.12754	5.43248	6.32798	5.38242	1.31616	0.850574	0.759788	1.17568
GAAAGGTCTTGGTTGACGT	2700097O09Rik_CCDS25912.1_ex4_12:55059485-55059507:-_5-2	2700097O09Rik	6.74564	3.49615	6.4554	6.2383	0.518283	0.966368	1.92945	1.0348
AATGAACTTCAACTCCGTG	2700097O09Rik_CCDS25912.1_ex4_12:55059534-55059556:+_5-3	2700097O09Rik	8.09338	5.20855	10.4454	11.1438	0.643557	1.06686	1.55386	0.937334
GCTGCACTTTACCCCATAA	2700097O09Rik_CCDS25912.1_ex4_12:55059444-55059466:+_5-1	2700097O09Rik	3.87604	6.88802	13.2249	17.024	1.77708	1.28727	0.562722	0.77684
AAGGTCGTTAAAAAAGATG	2810004N23Rik_CCDS22775.1_ex4_8:124842389-124842411:-_5-3	2810004N23Rik	2.69596	3.36443	1.69288	1	1.24795	0.590711	0.801313	1.69288
ACGCTCACCCAGGTCGTAG	2810004N23Rik_CCDS22775.1_ex6_8:124862876-124862898:+_5-5	2810004N23Rik	9.71841	7.6125	4.7272	3.14762	0.783307	0.665854	1.27664	1.50183
GATAGCTCGCTCCCGCTCC	2810004N23Rik_CCDS22775.1_ex3_8:124841701-124841723:+_5-1	2810004N23Rik	11.524	12.8221	1	1	1.11265	1	0.898757	1
GTACACCGCTTTGGGATCA	2810004N23Rik_CCDS22775.1_ex3_8:124841749-124841771:-_5-2	2810004N23Rik	20.0038	13.5927	4.5042	7.39532	0.679507	1.64187	1.47166	0.609061
TGCCTGGATCTCCTGTACG	2810004N23Rik_CCDS22775.1_ex5_8:124861148-124861170:-_5-4	2810004N23Rik	20.6358	11.9462	3.94671	7.35569	0.578907	1.86375	1.72739	0.536552
TGCTCAAACACGTGCCCTC	2810006K23Rik_CCDS51647.1_ex0_5:124338900-124338922:+_5-5	2810006K23Rik	15.7865	24.0647	14.9292	8.37007	1.52439	0.560651	0.656001	1.78364
CGAGCTCACTCTCATTCAG	2810006K23Rik_CCDS51647.1_ex0_5:124338813-124338835:-_5-3	2810006K23Rik	10.1698	14.5872	6.00941	4.38389	1.43437	0.729504	0.697172	1.37079
GCACTGCTCTTCCCAGGAA	2810006K23Rik_CCDS51647.1_ex0_5:124338740-124338762:+_5-1	2810006K23Rik	16.9472	11.9396	4.18564	3.51216	0.704517	0.839099	1.41941	1.19175
ATTCAGGGGGAGCAGAGCA	2810006K23Rik_CCDS51647.1_ex0_5:124338800-124338822:-_5-2	2810006K23Rik	18.6496	7.59274	1.34246	2.56911	0.407126	1.91374	2.45624	0.522537
TCGAAGAACAGTTCGTGAA	2810006K23Rik_CCDS51647.1_ex0_5:124338831-124338853:+_5-4	2810006K23Rik	1	1	1.66102	3.25064	1	1.95702	1	0.510982
GACAATTTCATTCAACCAG	2810007J24Rik_CCDS20833.1_ex4_7:14425530-14425552:+_5-4	2810007J24Rik	9.76355	10.8595	10.4375	6.27	1.11225	0.600721	0.899081	1.66467
TGCCAATGAGCGCACACCA	2810007J24Rik_CCDS20833.1_ex4_7:14425462-14425484:-_5-2	2810007J24Rik	10.2665	15.3051	22.1925	19.7818	1.49078	0.891375	0.67079	1.12186
ATTGTAGATTGGACCCATG	2810007J24Rik_CCDS20833.1_ex4_7:14425483-14425505:+_5-3	2810007J24Rik	15.4576	6.05817	4.20157	4.70881	0.391922	1.12073	2.55153	0.892278
TAGTGACTTATCCAAAATC	2810007J24Rik_CCDS20833.1_ex5_7:14427783-14427805:-_5-5	2810007J24Rik	1.74803	1	2.79989	6.90398	0.572073	2.46581	1.74803	0.405547
ACTTCAATGCTCTAAAACA	2810007J24Rik_CCDS20833.1_ex3_7:14423490-14423512:-_5-1	2810007J24Rik	1	1	1.01593	2.55326	1	2.51323	1	0.397894
CTAAGAGGCGCGGGAGGTC	2810021J22Rik_CCDS24751.1_ex3_11:58880217-58880239:-_5-2	2810021J22Rik	19.1913	36.4401	22.4712	14.7892	1.89878	0.658139	0.526653	1.51944
GGTTACACGTGTCAGAGAA	2810021J22Rik_CCDS24751.1_ex3_11:58880441-58880463:-_5-5	2810021J22Rik	11.2338	8.44894	11.0905	7.81533	0.752099	0.704687	1.32961	1.41907
CATACAGTGCGCACATCGA	2810021J22Rik_CCDS24751.1_ex3_11:58880298-58880320:-_5-3	2810021J22Rik	33.6553	29.0043	42.2381	33.7374	0.861805	0.798743	1.16036	1.25197
TCGTCGAGCTGTCTCCCAA	2810021J22Rik_CCDS24751.1_ex3_11:58880336-58880358:-_5-4	2810021J22Rik	6.66825	16.8331	8.2075	9.03575	2.52437	1.10091	0.396139	0.908337
ATCTGAGGTGCTTGATACA	2810021J22Rik_CCDS24751.1_ex3_11:58880112-58880134:+_5-1	2810021J22Rik	6.57153	8.54115	5.99349	11.1834	1.29972	1.86592	0.769396	0.535928
CTGTTGCACCATTGAAAGT	2810403A07Rik_CCDS17483.1_ex5_3:88693486-88693508:-_5-3	2810403A07Rik	7.90637	2.20527	9.39415	5.06542	0.278923	0.53921	3.58522	1.85456
CTAGTTAGGCTTTTGCCAG	2810403A07Rik_CCDS17483.1_ex2_3:88689182-88689204:-_5-1	2810403A07Rik	34.7903	22.9582	46.9926	40.4972	0.659904	0.861778	1.51537	1.16039
GCCAAAACCTACTCCGGAC	2810403A07Rik_CCDS17483.1_ex5_3:88693575-88693597:-_5-4	2810403A07Rik	9.52495	9.44345	8.71721	9.40029	0.991443	1.07836	1.00863	0.927333
TGCCAAAGTCTTTCTACGA	2810403A07Rik_CCDS17483.1_ex6_3:88696686-88696708:+_5-5	2810403A07Rik	10.2988	6.78923	6.64654	7.90251	0.659227	1.18896	1.51693	0.841068
GGGCTGCTGTGTCAACTCG	2810403A07Rik_CCDS17483.1_ex3_3:88689639-88689661:+_5-2	2810403A07Rik	24.9756	16.899	15.2557	18.9735	0.676619	1.24369	1.47794	0.804056
AACTAAGGCGTCCACCCCC	2810408A11Rik_CCDS24920.1_ex8_11:69900431-69900453:-_5-2	2810408A11Rik	16.1734	8.4687	13.0895	8.23535	0.523619	0.629157	1.90978	1.58943
GCGAAGCAAGGCTACTCCG	2810408A11Rik_CCDS24920.1_ex8_11:69900613-69900635:+_5-4	2810408A11Rik	1	1	3.78743	3.21895	1	0.849902	1	1.17661
CTTACTTCTCCGAACCGGG	2810408A11Rik_CCDS24920.1_ex8_11:69900297-69900319:+_5-1	2810408A11Rik	29.1349	20.9034	26.9311	28.6813	0.717467	1.06499	1.39379	0.938976
CAGACACCGGATTACCCCC	2810408A11Rik_CCDS24920.1_ex8_11:69900630-69900652:-_5-5	2810408A11Rik	9.3315	2.04061	8.68535	9.51917	0.21868	1.096	4.57289	0.912407
ACCTCCTGAAGTTGCGGAG	2810408A11Rik_CCDS24920.1_ex8_11:69900497-69900519:+_5-3	2810408A11Rik	17.4051	14.5345	4.63959	12.1977	0.835076	2.62906	1.1975	0.380364
GTGCTTCACCACGGCCGCG	2810408M09Rik_CCDS17082.1_ex1_2:165493146-165493168:+_5-4	2810408M09Rik	20.726	15.1602	2.37779	1	0.731458	0.420559	1.36713	2.37779
CGGCGGCGGACAGTGCAGG	2810408M09Rik_CCDS17082.1_ex1_2:165493077-165493099:-_5-2	2810408M09Rik	13.71	4.96486	6.40762	4.56616	0.362133	0.712614	2.76141	1.40328
CCACGGAAGACGCGCGCCT	2810408M09Rik_CCDS17082.1_ex1_2:165493180-165493202:+_5-5	2810408M09Rik	1	1	1	1	1	1	1	1
GCGTCTAACTGCTTATATA	2810408M09Rik_CCDS17082.1_ex0_2:165491655-165491677:-_5-1	2810408M09Rik	1	2.0472	1	1	2.0472	1	0.488472	1
CCGAAGAGCTACCGGCACC	2810408M09Rik_CCDS17082.1_ex1_2:165493119-165493141:-_5-3	2810408M09Rik	1.05804	4.67507	1	2.04607	4.41863	2.04607	0.226314	0.488741
TCCCCTAAAGAGTCTAAAA	2810417H13Rik_CCDS23299.1_ex2_9:65893457-65893479:+_5-5	2810417H13Rik	2.41868	4.12842	2.56096	1	1.70689	0.390478	0.58586	2.56096
AAGTTCGTCGAGAAAAGGT	2810417H13Rik_CCDS23299.1_ex1_9:65890792-65890814:+_5-1	2810417H13Rik	5.00453	7.73105	9.18709	8.46517	1.54481	0.92142	0.647329	1.08528
AAGTGGCAAAAAGGCATCG	2810417H13Rik_CCDS23299.1_ex2_9:65893421-65893443:+_5-4	2810417H13Rik	9.82803	13.1778	2.71228	3.30612	1.34084	1.21894	0.745802	0.820382
CTTCAGAATGAACGCGCAC	2810428I15Rik_CCDS22370.1_ex3_8:70506516-70506538:-_5-4	2810428I15Rik	9.32505	8.19208	17.8042	6.93568	0.878503	0.389552	1.1383	2.56705
TACCGGAGTGTCGTGCACG	2810428I15Rik_CCDS22370.1_ex2_8:70505890-70505912:-_5-2	2810428I15Rik	10.144	3.43688	11.648	7.37947	0.338808	0.63354	2.95152	1.57843
CGCTCACTGGTCTAGACGG	2810428I15Rik_CCDS22370.1_ex3_8:70506489-70506511:+_5-3	2810428I15Rik	18.5335	20.0208	21.0854	18.2444	1.08025	0.865259	0.925714	1.15572
CGAGCACCGGTTGCGCTCG	2810428I15Rik_CCDS22370.1_ex2_8:70505805-70505827:+_5-1	2810428I15Rik	26.7038	26.3567	30.953	31.3441	0.987001	1.01264	1.01317	0.987522
GACGCCCCGATCGCTACAC	2810428I15Rik_CCDS22370.1_ex3_8:70506555-70506577:-_5-5	2810428I15Rik	5.04323	2.77826	6.1448	15.1062	0.55089	2.45836	1.81525	0.406775
ACCAGCACTCCGACCAGCG	2810459M11Rik_CCDS48302.1_ex0_1:86046357-86046379:-_5-5	2810459M11Rik	8.81561	24.7167	19.4608	10.9932	2.80375	0.564889	0.356666	1.77026
GGCGGCCACCGAGTCGCAC	2810459M11Rik_CCDS48302.1_ex0_1:86046192-86046214:+_5-2	2810459M11Rik	14.2582	9.85838	16.0999	10.6603	0.691419	0.662136	1.4463	1.51026
TTTTCGTGCTGTGCCGCGT	2810459M11Rik_CCDS48302.1_ex0_1:86046257-86046279:+_5-3	2810459M11Rik	14.3678	13.079	17.8202	14.3929	0.9103	0.807676	1.09854	1.23812
TCCGGCGGGAACACGGCAC	2810459M11Rik_CCDS48302.1_ex0_1:86046120-86046142:-_5-1	2810459M11Rik	12.3816	6.64433	9.60919	8.17987	0.536628	0.851256	1.86349	1.17474
GTCGGATCGCTGACCTCCC	2810459M11Rik_CCDS48302.1_ex0_1:86046274-86046296:+_5-4	2810459M11Rik	24.2792	4.45114	15.9406	14.3295	0.183332	0.89893	5.45459	1.11243
CTTGTAATGATGTAGTAGC	2810474O19Rik_CCDS20717.1_ex0_6:149326145-149326167:-_5-2	2810474O19Rik	9.91186	9.40393	4.20953	1.8955	0.948755	0.450289	1.05401	2.2208
ATCTCATAATCCCGACGGA	2810474O19Rik_CCDS20717.1_ex0_6:149325888-149325910:+_5-1	2810474O19Rik	10.3891	21.2195	18.752	13.7748	2.04249	0.734578	0.4896	1.36133
AGAATCAGTACAACCGTAG	2810474O19Rik_CCDS20717.1_ex0_6:149326915-149326937:+_5-3	2810474O19Rik	1	1	1	1	1	1	1	1
TACTTTCGATTTGTAACAT	2810474O19Rik_CCDS20717.1_ex0_6:149327438-149327460:-_5-5	2810474O19Rik	8.80272	5.49176	1.59731	2.8861	0.623871	1.80686	1.6029	0.553448
CACAGCTCGGTATGAGAAC	2810474O19Rik_CCDS20717.1_ex0_6:149327033-149327055:-_5-4	2810474O19Rik	4.59183	2.18551	3.89097	11.9679	0.475956	3.07582	2.10104	0.325116
TTCTGACTCTCGACGGACC	2900011O08Rik_CCDS27971.1_ex1_16:14049474-14049496:-_5-3	2900011O08Rik	18.6432	8.71897	20.3368	12.063	0.467677	0.593162	2.13823	1.68588
CGAGGTGGAACGCTTAAGG	2900011O08Rik_CCDS27971.1_ex3_16:14093985-14094007:+_5-5	2900011O08Rik	3.88249	2.80461	3.54055	3.23479	0.722373	0.913643	1.38433	1.09452
CAGGACTTCACGGAGACGC	2900011O08Rik_CCDS27971.1_ex1_16:14049456-14049478:-_5-2	2900011O08Rik	31.2565	16.023	30.5786	29.038	0.51263	0.949616	1.95072	1.05306
CATGGAGATGATGTCTAGC	2900011O08Rik_CCDS27971.1_ex1_16:14049384-14049406:-_5-1	2900011O08Rik	11.3821	17.3666	17.9954	19.1399	1.52578	1.0636	0.655404	0.940203
AGAACTTGGTCGCCATCCC	2900011O08Rik_CCDS27971.1_ex2_16:14088998-14089020:+_5-4	2900011O08Rik	30.5665	20.7848	14.7858	15.8352	0.679987	1.07097	1.47062	0.933731
GTGGACTCCAGCTCGGAAC	2900026A02Rik_CCDS39217.1_ex4_5:113097667-113097689:+_5-1	2900026A02Rik	4.01146	13.2568	11.3533	9.42407	3.30474	0.830071	0.302596	1.20472
CGACAGCCAGTATGGGACC	2900026A02Rik_CCDS39217.1_ex5_5:113101485-113101507:-_5-5	2900026A02Rik	14.1356	23.6169	21.6668	19.9799	1.67073	0.922143	0.598541	1.08443
TATACCGAGTCCACGTCGG	2900026A02Rik_CCDS39217.1_ex4_5:113097738-113097760:-_5-2	2900026A02Rik	13.9164	7.21733	9.55344	9.28142	0.51862	0.971527	1.92819	1.02931
GCAGACCAGCACCAGAACG	2900026A02Rik_CCDS39217.1_ex5_5:113101463-113101485:-_5-4	2900026A02Rik	14.5097	10.1811	16.9999	20.3048	0.701677	1.19441	1.42516	0.837233
GTCAGGAGACGGAGACTCG	2900026A02Rik_CCDS39217.1_ex4_5:113097810-113097832:+_5-3	2900026A02Rik	1.8641	4.00987	2.38575	4.66126	2.1511	1.95379	0.464878	0.511826
TATACTTACTATATCACGT	2900092C05Rik_CCDS20811.1_ex3_7:12550571-12550593:-_5-5	2900092C05Rik	2.63793	3.08122	2.33	1	1.16805	0.429184	0.856129	2.33
ATTCTGATGGCTTCACAGT	2900092C05Rik_CCDS20811.1_ex2_7:12515461-12515483:-_5-2	2900092C05Rik	18.5335	28.7738	15.6778	11.1517	1.55253	0.711302	0.644112	1.40587
CAGAATTCGATACAAATAA	2900092C05Rik_CCDS20811.1_ex2_7:12515476-12515498:+_5-3	2900092C05Rik	1	1	1	1	1	1	1	1
ATGCAAAGACTTACGTGCT	2900092C05Rik_CCDS20811.1_ex1_7:12512901-12512923:-_5-1	2900092C05Rik	4.81108	3.06805	2.52911	2.71176	0.637706	1.07222	1.56812	0.932644
CAGTAATTCCACGTAGGCC	2900092C05Rik_CCDS20811.1_ex3_7:12550480-12550502:+_5-4	2900092C05Rik	21.0162	15.2261	17.2706	21.8422	0.724492	1.2647	1.38028	0.790699
GTTCGCAGTACTGAGGGCA	3010026O09Rik_CCDS48784.1_ex6_11:50199577-50199599:-_5-5	3010026O09Rik	7.09386	22.9978	18.3378	11.7857	3.24192	0.642696	0.308459	1.55594
CTTACTTTCAGGACTCCAC	3010026O09Rik_CCDS48784.1_ex6_11:50199524-50199546:+_5-4	3010026O09Rik	29.1736	26.225	27.5921	22.4049	0.898928	0.812004	1.11244	1.23152
TCAACCAACGGGACTCGAG	3010026O09Rik_CCDS48784.1_ex4_11:50196956-50196978:-_5-1	3010026O09Rik	16.9923	11.6103	15.9327	14.179	0.683266	0.889929	1.46356	1.12369
GCTTTCAACCAGTGCTGAG	3010026O09Rik_CCDS48784.1_ex4_11:50197041-50197063:+_5-2	3010026O09Rik	17.9532	6.76288	19.3413	23.2608	0.376696	1.20265	2.65466	0.831499
GGAAATGGAATCAGCGCAC	3010026O09Rik_CCDS48784.1_ex5_11:50197617-50197639:+_5-3	3010026O09Rik	16.5474	17.4456	11.6639	19.6471	1.05428	1.68443	0.948513	0.593672
GGAGTTGTCGCGTGCTGTC	3110001D03Rik_CCDS18288.1_ex1_4:75278091-75278113:-_5-3	3110001D03Rik	23.9374	12.1306	8.5181	3.80538	0.506763	0.44674	1.97331	2.23844
CACGGCGGATTTCGCGGGT	3110001D03Rik_CCDS18288.1_ex1_4:75278152-75278174:+_5-5	3110001D03Rik	15.348	10.2272	16.6017	15.4152	0.666355	0.928535	1.5007	1.07697
CCCTGAGTTAAAAACCTGC	3110001D03Rik_CCDS18288.1_ex1_4:75278111-75278133:-_5-4	3110001D03Rik	7.51301	13.079	6.06516	7.1655	1.74085	1.18142	0.574433	0.84644
CTACGTCTATTTGGTGGCC	3110001D03Rik_CCDS18288.1_ex1_4:75278045-75278067:-_5-1	3110001D03Rik	57.7148	21.2458	18.2662	22.7457	0.368118	1.24524	2.71652	0.803061
TCGGGCTCTACACTCTTCG	3110001D03Rik_CCDS18288.1_ex1_4:75278074-75278096:-_5-2	3110001D03Rik	15.348	8.42918	5.92977	8.2195	0.549205	1.38614	1.82081	0.721428
AAGCCAACAGCATGAGTGC	3110001I22Rik_CCDS37260.1_ex0_16:13677187-13677209:+_5-1	3110001I22Rik	11.9947	7.1844	10.7401	7.85496	0.598963	0.731368	1.66955	1.3673
TCACTGTGCCGTTTGTAGG	3110001I22Rik_CCDS37260.1_ex0_16:13677430-13677452:-_5-3	3110001I22Rik	33.3845	34.7936	31.7573	23.5778	1.04221	0.742436	0.959502	1.34692
ACGTCCTAAAGCTGCAAGC	3110001I22Rik_CCDS37260.1_ex0_16:13677583-13677605:+_5-5	3110001I22Rik	9.53785	1	10.2622	9.50332	0.104845	0.926047	9.53785	1.07986
AAGTTTAAACAAACTCAAA	3110001I22Rik_CCDS37260.1_ex0_16:13677547-13677569:+_5-4	3110001I22Rik	1	1	1	1	1	1	1	1
CAAACTGCATTCTTCCCAT	3110001I22Rik_CCDS37260.1_ex0_16:13677376-13677398:+_5-2	3110001I22Rik	16.3217	13.0066	13.87	15.1458	0.796888	1.09198	1.25488	0.915765
ACGTCTAACAGCACGGGAG	3110002H16Rik_CCDS29063.1_ex7_18:12180527-12180549:+_5-2	3110002H16Rik	18.2885	11.6827	10.8118	7.01493	0.638803	0.648824	1.56543	1.54125
CAACCTTACGAGATCCCCC	3110002H16Rik_CCDS29063.1_ex9_18:12181670-12181692:+_5-5	3110002H16Rik	11.9496	10.9319	8.74906	9.28935	0.914836	1.06175	1.09309	0.941838
CGCAATGTCTCGTTCTGAA	3110002H16Rik_CCDS29063.1_ex6_18:12179560-12179582:-_5-1	3110002H16Rik	7.64198	15.3644	10.0392	13.1012	2.01053	1.305	0.497382	0.766286
CTGGTCGTTGTCCACCATC	3110002H16Rik_CCDS29063.1_ex8_18:12180741-12180763:+_5-3	3110002H16Rik	8.34487	12.1174	11.0109	16.3583	1.45208	1.48565	0.688667	0.673107
TATTTGACATCAGGCTACG	3110002H16Rik_CCDS29063.1_ex9_18:12181593-12181615:+_5-4	3110002H16Rik	5.20444	25.2963	9.64901	16.5722	4.86053	1.71751	0.205739	0.582239
CGTATTTGTAATTTCTGAG	3110009E18Rik_CCDS15232.1_ex1_1:120160635-120160657:-_6-4	3110009E18Rik	8.43515	3.10098	5.81031	2.97328	0.367626	0.511724	2.72015	1.95418
AACTTGCATCAAACTGTAA	3110009E18Rik_CCDS15232.1_ex0_1:120150701-120150723:+_6-1	3110009E18Rik	1	3.05488	1	1	3.05488	1	0.327345	1
GACGACACACTCCTGCTAA	3110009E18Rik_CCDS15232.1_ex3_1:120171430-120171452:+_6-6	3110009E18Rik	10.1053	15.292	11.7276	12.4434	1.51326	1.06103	0.660826	0.942477
TGGCAGGCTGGTCCTCAAA	3110009E18Rik_CCDS15232.1_ex1_1:120160610-120160632:-_6-3	3110009E18Rik	2.44447	1	7.70577	9.89163	0.409087	1.28367	2.44447	0.779019
TTATAATATTTCTAAAGCA	3110009E18Rik_CCDS15232.1_ex0_1:120150726-120150748:+_6-2	3110009E18Rik	2.72821	1.00659	1.7088	2.60081	0.368955	1.52201	2.71035	0.657028
CATCAAGCTCACAAAGCAA	3110009E18Rik_CCDS15232.1_ex2_1:120166151-120166173:+_6-5	3110009E18Rik	2.90876	1.00659	2.94324	4.59786	0.346053	1.56218	2.88973	0.640132
TTTTGGTGGGATGCGCCCC	3110035E14Rik_CCDS14813.1_ex2_1:9613438-9613460:-_5-5	3110035E14Rik	11.2274	15.6937	16.3468	10.5969	1.39781	0.648257	0.715405	1.5426
CGACCTGTACCCGCCACCA	3110035E14Rik_CCDS14813.1_ex2_1:9613325-9613347:+_5-1	3110035E14Rik	12.53	14.3106	24.8604	21.6837	1.14211	0.872219	0.875571	1.1465
CCTCAACGCTGTGAGCGCA	3110035E14Rik_CCDS14813.1_ex2_1:9613362-9613384:+_5-3	3110035E14Rik	31.1727	31.1053	33.374	37.145	0.99784	1.11299	1.00217	0.898479
CGTTGAGGCAGTAGCTCCA	3110035E14Rik_CCDS14813.1_ex2_1:9613349-9613371:-_5-2	3110035E14Rik	6.75209	10.3853	7.53056	9.1784	1.53808	1.21882	0.65016	0.820465
ACCGCAGATGGTTGCAGAC	3110035E14Rik_CCDS14813.1_ex2_1:9613393-9613415:+_5-4	3110035E14Rik	11.2016	13.0724	11.2259	14.1869	1.16702	1.26376	0.856886	0.791287
TTCCTAGATCTGAGCACTG	3110040N11Rik_CCDS40010.1_ex1_7:81786190-81786212:-_5-3	3110040N11Rik	17.7984	8.54115	13.2169	7.41117	0.479882	0.560733	2.08384	1.78338
TAGCCATTCATGCCAAACC	3110040N11Rik_CCDS40010.1_ex2_7:81788473-81788495:-_5-5	3110040N11Rik	11.2596	6.08451	14.7858	9.97088	0.540384	0.674353	1.85054	1.4829
CCTGTCACAGCGTTCTGTC	3110040N11Rik_CCDS40010.1_ex2_7:81788448-81788470:+_5-4	3110040N11Rik	10.1311	20.4226	19.3333	15.8115	2.01583	0.817834	0.496074	1.22274
TCGGACGGAGGTGCTGCAA	3110040N11Rik_CCDS40010.1_ex1_7:81786155-81786177:+_5-1	3110040N11Rik	20.7712	26.3172	21.412	25.3292	1.267	1.18294	0.789263	0.845349
GCTGCAATGGCCACACCAA	3110040N11Rik_CCDS40010.1_ex1_7:81786167-81786189:+_5-2	3110040N11Rik	18.5851	18.012	15.5106	18.704	0.969164	1.20589	1.03182	0.829265
ATTAATCTTCGACGGAAAC	3110043O21Rik_CCDS38708.1_ex9_4:35218549-35218571:-_5-4	3110043O21Rik	2.36064	4.48408	3.53258	1	1.89952	0.283079	0.526449	3.53258
AACACACACTCTGTGAAGT	3110043O21Rik_CCDS38708.1_ex9_4:35218461-35218483:+_5-3	3110043O21Rik	4.61762	3.29198	11.5763	4.85938	0.712917	0.419769	1.40269	2.38226
TTGCCAACCACACTCTAAA	3110043O21Rik_CCDS38708.1_ex9_4:35218652-35218674:-_5-5	3110043O21Rik	5.33986	12.0845	9.19505	10.8347	2.26307	1.17832	0.441877	0.848668
ACTACAACGGAACAGCCAC	3110043O21Rik_CCDS38708.1_ex5_4:35211319-35211341:+_5-1	3110043O21Rik	13.7229	16.3194	14.6425	21.8739	1.18921	1.49387	0.840898	0.669404
TAACACACATTATTCGAAA	3110043O21Rik_CCDS38708.1_ex9_4:35218433-35218455:-_5-2	3110043O21Rik	1	3.38419	1.33449	2.10947	3.38419	1.58073	0.295492	0.632619
ACCCGCCGGTCGCAGCGTC	3110047P20Rik_CCDS51508.1_ex0_5:63650273-63650295:+_5-1	3110047P20Rik	18.8495	20.2843	25.3542	28.2059	1.07612	1.11247	0.929268	0.898898
CAAACTCATCCTCGATAGC	3110047P20Rik_CCDS51508.1_ex5_5:63800031-63800053:-_5-2	3110047P20Rik	12.962	12.6838	11.1622	13.1329	0.978539	1.17655	1.02193	0.849942
CGAGGCAGCCATTCAAGTA	3110047P20Rik_CCDS51508.1_ex6_5:63805412-63805434:-_5-5	3110047P20Rik	7.33245	7.4215	11.4887	15.2488	1.01214	1.32729	0.988002	0.753417
AAACAAGTCACGAAGGTCG	3110047P20Rik_CCDS51508.1_ex6_5:63804541-63804563:-_5-4	3110047P20Rik	6.28134	3.20636	5.10151	8.78216	0.510458	1.72148	1.95903	0.580895
GTCCCCCATACACAACGAG	3110047P20Rik_CCDS51508.1_ex5_5:63800559-63800581:-_5-3	3110047P20Rik	2.58634	10.8595	7.25978	14.4642	4.19878	1.99238	0.238164	0.501912
GATGCTCCTATGTCTGCAT	3110052M02Rik_CCDS49994.1_ex2_17:21661505-21661527:-_5-4	3110052M02Rik	8.73823	9.48955	7.2996	3.16347	1.08598	0.433376	0.920827	2.30746
GTTCTCACCGACAGAGACC	3110052M02Rik_CCDS49994.1_ex1_17:21659026-21659048:-_5-1	3110052M02Rik	1.78672	7.31612	5.26079	2.94158	4.09472	0.559151	0.244217	1.78842
TGGTTTGATGAGTCAACAG	3110052M02Rik_CCDS49994.1_ex2_17:21661486-21661508:-_5-3	3110052M02Rik	4.07595	6.29527	4.75109	5.86583	1.54449	1.23463	0.647462	0.80996
ATGTTTCAGTACCTCCTCA	3110052M02Rik_CCDS49994.1_ex2_17:21661732-21661754:+_5-5	3110052M02Rik	6.53928	11.9594	10.1826	19.5916	1.82885	1.92403	0.546792	0.519743
TGATGAACAGTATCACATG	3110052M02Rik_CCDS49994.1_ex2_17:21661324-21661346:-_5-2	3110052M02Rik	2.87007	1	1.48581	3.37744	0.348423	2.27313	2.87007	0.439922
CGGGTAGTCACTTGAAACC	3110057O12Rik_CCDS38422.2_ex1_3:40905920-40905942:-_5-2	3110057O12Rik	5.23023	1.48079	6.26427	1.00792	0.283121	0.160901	3.53206	6.21501
CAGTTGGACACTGCTAAGG	3110057O12Rik_CCDS38422.2_ex7_3:40930141-40930163:-_5-4	3110057O12Rik	5.25603	3.04829	2.01144	1	0.579962	0.497156	1.72425	2.01144
TACCCGGTACACATCGATA	3110057O12Rik_CCDS38422.2_ex1_3:40905935-40905957:+_5-3	3110057O12Rik	6.44256	3.11416	4.09803	2.1174	0.483373	0.516686	2.0688	1.93541
GGCATGGAATCAACGGCAT	3110057O12Rik_CCDS38422.2_ex7_3:40930170-40930192:-_5-5	3110057O12Rik	2.83783	3.13391	3.98654	3.2031	1.10433	0.803479	0.905523	1.24459
CGAGAAAGGTGCCAGAACC	3110057O12Rik_CCDS38422.2_ex1_3:40905902-40905924:+_5-1	3110057O12Rik	13.1813	12.4928	3.49276	5.04165	0.947772	1.44346	1.05511	0.692781
GACAGATGTTACCTCAATC	3110062M04Rik_CCDS19997.1_ex1_6:34875524-34875546:+_5-1	3110062M04Rik	3.70193	9.50272	5.85013	2.00645	2.56696	0.342975	0.389565	2.91566
AGTACACGGTCTCCGTGGC	3110062M04Rik_CCDS19997.1_ex1_6:34875586-34875608:+_5-3	3110062M04Rik	9.2928	16.9648	18.2263	9.47954	1.82559	0.520101	0.547769	1.9227
CCGCCTGGGCCCAGAGAGT	3110062M04Rik_CCDS19997.1_ex2_6:34876551-34876573:-_5-4	3110062M04Rik	5.87509	5.08342	3.42905	3.21102	0.865249	0.936417	1.15574	1.0679
AGGAAGCAGACAGCCGCCT	3110062M04Rik_CCDS19997.1_ex2_6:34876564-34876586:-_5-5	3110062M04Rik	19.2751	12.124	28.1416	33.9434	0.628998	1.20616	1.58983	0.829075
AAATGGTAGACGTGGCACT	3110062M04Rik_CCDS19997.1_ex1_6:34875550-34875572:-_5-2	3110062M04Rik	8.84141	7.96815	20.8465	25.6065	0.901231	1.22834	1.10959	0.81411
TCAATAGGCTCGTTCCACA	3110079O15Rik_CCDS48305.1_ex1_1:87475050-87475072:-_5-1	3110079O15Rik	9.47981	12.4665	16.6654	13.0299	1.31506	0.781852	0.760423	1.27901
GAGCAGAGGTGGGGAACGG	3110079O15Rik_CCDS48305.1_ex1_1:87475136-87475158:-_5-4	3110079O15Rik	1.00645	3.27881	1	1	3.2578	1	0.306956	1
CCTCCATCCTGGTCCACCC	3110079O15Rik_CCDS48305.1_ex1_1:87475185-87475207:-_5-5	3110079O15Rik	29.0317	18.8748	23.3393	24.6952	0.650144	1.05809	1.53812	0.945095
CCAGGGGACCTTCACCAGA	3110079O15Rik_CCDS48305.1_ex1_1:87475076-87475098:-_5-3	3110079O15Rik	11.0017	12.2294	13.1691	15.6213	1.11159	1.1862	0.899608	0.843026
CACCAGAGGGCAATTCAAT	3110079O15Rik_CCDS48305.1_ex1_1:87475064-87475086:-_5-2	3110079O15Rik	5.47528	12.5916	7.4987	12.9031	2.29972	1.72071	0.434835	0.581157
GAGACGCCGAGGACATCGG	3110082I17Rik_CCDS51684.1_ex3_5:139455449-139455471:-_5-5	3110082I17Rik	11.2016	6.54554	17.9476	8.10855	0.584341	0.45179	1.71133	2.21342
GCTGGCAGCGTCTGAACCT	3110082I17Rik_CCDS51684.1_ex2_5:139364014-139364036:+_5-2	3110082I17Rik	13.7681	13.7969	12.7311	10.0026	1.00209	0.78568	0.997912	1.27278
CTCCTCTGGGGACAACTCA	3110082I17Rik_CCDS51684.1_ex2_5:139364127-139364149:+_5-4	3110082I17Rik	5.75901	3.49615	10.2463	9.33689	0.607075	0.911244	1.64724	1.0974
GCTGCTACACAGACTGCCA	3110082I17Rik_CCDS51684.1_ex2_5:139364031-139364053:-_5-3	3110082I17Rik	4.76594	5.1361	12.6913	13.751	1.07767	1.0835	0.927929	0.922935
GAGCCAGGGTGGCAGCCGA	3110082I17Rik_CCDS51684.1_ex2_5:139363988-139364010:+_5-1	3110082I17Rik	17.3922	2.7124	2.68839	6.19075	0.155955	2.30277	6.41209	0.434259
GGGGCTGATGCCCCGTGGA	3110082J24Rik_CCDS57333.1_ex1_5:30105119-30105141:+_5-1	3110082J24Rik	4.47576	4.00329	6.16073	3.8767	0.894438	0.62926	1.11802	1.58917
TGCGCGGGACTGGCCGTCG	3110082J24Rik_CCDS57333.1_ex1_5:30105234-30105256:+_5-4	3110082J24Rik	19.5589	30.8089	26.8355	22.8645	1.57519	0.852025	0.634844	1.17367
GTCCCGGGACGGCGAACCC	3110082J24Rik_CCDS57333.1_ex1_5:30105255-30105277:+_5-5	3110082J24Rik	11.6401	9.60152	12.3329	11.3894	0.824868	0.923499	1.21232	1.08284
CTGAGCCTCGGGAGTCACG	3110082J24Rik_CCDS57333.1_ex1_5:30105149-30105171:-_5-2	3110082J24Rik	11.524	9.20635	3.61222	4.87523	0.798885	1.34965	1.25174	0.740934
CGCGCAGCCCGAGCTGCGC	3110082J24Rik_CCDS57333.1_ex1_5:30105220-30105242:+_5-3	3110082J24Rik	2.69596	4.46432	1.01593	2.35514	1.65593	2.31822	0.603891	0.431366
ATTATATTTAGGCTACAGT	3300002I08Rik_CCDS50740.1_ex1_2:150344359-150344381:-_4-2	3300002I08Rik	9.08645	3.13391	8.33493	8.23535	0.3449	0.988052	2.89939	1.01209
TGTTTTCCCACCCAGGTCG	3300002I08Rik_CCDS50740.1_ex0_2:150311212-150311234:-_4-1	3300002I08Rik	28.9221	24.9143	24.1596	27.0964	0.861428	1.12156	1.16086	0.891617
CCTCAGGTGAAGCGGAGTA	3425401B19Rik_CCDS49437.1_ex0_14:32662863-32662885:-_5-3	3425401B19Rik	19.0494	43.9812	28.1416	11.5638	2.3088	0.410913	0.433126	2.4336
TGGGGTCACCCTTCCCGAT	3425401B19Rik_CCDS49437.1_ex0_14:32662357-32662379:-_5-2	3425401B19Rik	27.5034	27.8056	18.3219	10.8585	1.01099	0.592649	0.989132	1.68734
CGAAGTCTGTGCATCTCGG	3425401B19Rik_CCDS49437.1_ex0_14:32663874-32663896:-_5-5	3425401B19Rik	21.416	16.1943	23.7295	21.7471	0.756174	0.916459	1.32245	1.09116
TCTGAAATGGGACCGGCTA	3425401B19Rik_CCDS49437.1_ex0_14:32662026-32662048:-_5-1	3425401B19Rik	7.57105	10.438	16.6017	15.6213	1.37867	0.940946	0.725338	1.06276
GTGTCGGGGACTTTTCACC	3425401B19Rik_CCDS49437.1_ex0_14:32663799-32663821:-_5-4	3425401B19Rik	28.9415	27.2261	22.519	25.2341	0.940729	1.12057	1.06301	0.892404
GACTGCTGCTACAATAGGC	3632451O06Rik_CCDS36903.1_ex6_14:49773666-49773688:+_5-2	3632451O06Rik	5.95892	10.4841	10.764	5.44582	1.75939	0.50593	0.568379	1.97656
GGAACGACAGTAGTTCCCA	3632451O06Rik_CCDS36903.1_ex6_14:49773505-49773527:+_5-1	3632451O06Rik	11.0726	3.13391	14.7221	10.1373	0.283033	0.688575	3.53315	1.45227
ACTGTTATAGGGTCCCTCC	3632451O06Rik_CCDS36903.1_ex6_14:49773696-49773718:+_5-3	3632451O06Rik	20.0747	10.5697	13.201	9.91541	0.526516	0.751111	1.89928	1.33136
GTCCTTCAGATAGTACCAT	3632451O06Rik_CCDS36903.1_ex6_14:49773950-49773972:+_5-4	3632451O06Rik	5.70742	7.38198	7.8969	9.71729	1.2934	1.23052	0.773156	0.812666
GCTTGACATCCTGTAGCCA	3632451O06Rik_CCDS36903.1_ex6_14:49774108-49774130:+_5-5	3632451O06Rik	2.20587	12.3084	7.06864	8.75838	5.57984	1.23905	0.179217	0.807071
CTTTGGAAAACGAACAAAC	3830403N18Rik_CCDS30141.1_ex3_X:56147167-56147189:+_5-4	3830403N18Rik	1.00645	3.21295	1	1.61813	3.19236	1.61813	0.313248	0.617995
CACATAAAAAGAAAACGCA	3830403N18Rik_CCDS30141.1_ex3_X:56147095-56147117:+_5-3	3830403N18Rik	1.02579	9.72007	2.34593	4.09067	9.47565	1.74373	0.105534	0.573483
TGTGGGTGTGGGATAAGCT	3830406C13Rik_CCDS26817.1_ex2_14:12297613-12297635:-_7-6	3830406C13Rik	9.21542	8.93631	6.52708	6.15905	0.969713	0.943614	1.03123	1.05975
AGAAAATGAAAAACAAATT	3830406C13Rik_CCDS26817.1_ex1_14:12287295-12287317:+_7-1	3830406C13Rik	1	1	1	1	1	1	1	1
CAGGACATAGATGCTGCAG	3830406C13Rik_CCDS26817.1_ex2_14:12297578-12297600:+_7-5	3830406C13Rik	4.61762	3.55543	6.73415	7.57759	0.769969	1.12525	1.29875	0.888693
CTTCTAGAAGCAGTCTCAG	3830406C13Rik_CCDS26817.1_ex1_14:12287353-12287375:-_7-3	3830406C13Rik	17.8887	17.3534	11.0188	13.2121	0.970078	1.19905	1.03085	0.833994
AATTACCTTCAAGAGTCGG	3830406C13Rik_CCDS26817.1_ex1_14:12287378-12287400:-_7-4	3830406C13Rik	14.7289	12.7299	15.2876	20.5505	0.864282	1.34426	1.15703	0.743903
TGGAGATGAAAACACAGAA	3830406C13Rik_CCDS26817.1_ex1_14:12287314-12287336:+_7-2	3830406C13Rik	2.54765	1	1.75659	4.27294	0.392519	2.43252	2.54765	0.411096
CCTCAAGAGAAAGCATCGA	3830406C13Rik_CCDS26817.1_ex2_14:12297636-12297658:-_7-7	3830406C13Rik	5.97181	4.31284	2.53707	6.52359	0.722199	2.57131	1.38466	0.388907
CCTATGACGGGATGCTACA	3830417A13Rik_CCDS30166.1_ex0_X:64177954-64177976:+_5-5	3830417A13Rik	5.08837	17.1427	13.7824	4.52654	3.36899	0.32843	0.296825	3.04479
TGCTCCTCATAATCTCCCA	3830417A13Rik_CCDS30166.1_ex0_X:64177817-64177839:-_5-4	3830417A13Rik	15.3673	6.31503	12.9143	9.62219	0.410939	0.745081	2.43345	1.34214
AAATAGAACCCATGGCAGT	3830417A13Rik_CCDS30166.1_ex0_X:64177639-64177661:-_5-1	3830417A13Rik	3.51493	2.96267	10.2463	10.0343	0.842884	0.979306	1.1864	1.02113
CTTTTCATTTAGTCCATCC	3830417A13Rik_CCDS30166.1_ex0_X:64177716-64177738:-_5-2	3830417A13Rik	3.96632	7.86277	9.54547	9.62219	1.98238	1.00804	0.504443	0.992027
CCTTCGAAACTTAACAAGC	3830417A13Rik_CCDS30166.1_ex0_X:64177758-64177780:-_5-3	3830417A13Rik	7.326	5.18879	6.21648	11.8491	0.708271	1.90607	1.41189	0.524639
GTTGCGTTGAGTCGGCCGA	4430402I18Rik_CCDS37948.1_ex5_19:28944280-28944302:+_5-3	4430402I18Rik	42.0707	23.8474	37.7702	23.8868	0.566841	0.632425	1.76416	1.58121
TCACACCTTGGCATGCAGA	4430402I18Rik_CCDS37948.1_ex7_19:28948651-28948673:-_5-5	4430402I18Rik	25.4528	21.7727	21.9296	16.2869	0.855415	0.742691	1.16902	1.34645
CCAAATTATTTTCACCAAA	4430402I18Rik_CCDS37948.1_ex4_19:28941777-28941799:+_5-2	4430402I18Rik	11.898	4.40504	11.1383	9.83616	0.370233	0.883094	2.701	1.13238
ACGTTGAGGGGAGGGTAAC	4430402I18Rik_CCDS37948.1_ex5_19:28944310-28944332:+_5-4	4430402I18Rik	1.00645	9.45003	7.24385	7.72023	9.38949	1.06576	0.106502	0.938294
AGCCTGGAGGCGAACATAA	4430402I18Rik_CCDS37948.1_ex3_19:28939134-28939156:-_5-1	4430402I18Rik	8.10628	9.48297	7.41906	8.80593	1.16983	1.18693	0.854825	0.842507
GATAGAGAAGTTACCGTGG	4632428N05Rik_CCDS35912.1_ex1_10:60358128-60358150:-_5-3	4632428N05Rik	8.49319	2.03403	10.541	2.61666	0.239489	0.248237	4.17555	4.02841
TATCACTAGACAGCAGTAG	4632428N05Rik_CCDS35912.1_ex1_10:60358182-60358204:-_5-4	4632428N05Rik	10.6599	10.3721	8.37475	6.07188	0.973002	0.725022	1.02775	1.37927
ATCGTGCCCTTTGGACACG	4632428N05Rik_CCDS35912.1_ex1_10:60357933-60357955:-_5-1	4632428N05Rik	25.3045	13.4808	10.1507	12.594	0.532742	1.2407	1.87708	0.805999
CGTGGTACCTCAGCTCACG	4632428N05Rik_CCDS35912.1_ex1_10:60357970-60357992:+_5-2	4632428N05Rik	12.2075	11.0768	8.91631	12.5623	0.907375	1.40891	1.10208	0.709768
GTAGAACCGTTGTTCTGGG	4632428N05Rik_CCDS35912.1_ex1_10:60358218-60358240:-_5-5	4632428N05Rik	16.7473	10.3589	10.3658	16.7387	0.618543	1.6148	1.6167	0.619271
TCTAAATTATGTTCCTCGA	4632434I11Rik_CCDS40022.1_ex0_7:92859668-92859690:+_5-3	4632434I11Rik	6.0234	5.51152	7.01289	4.39182	0.915017	0.626249	1.09288	1.59681
TACGGCCACTGGTTTACAC	4632434I11Rik_CCDS40022.1_ex2_7:92862324-92862346:-_5-5	4632434I11Rik	8.44805	3.07464	9.80032	6.39679	0.363947	0.652712	2.74766	1.53207
TTTTGGTTAGGAGTACCAC	4632434I11Rik_CCDS40022.1_ex0_7:92859899-92859921:+_5-4	4632434I11Rik	5.12706	4.94511	7.56241	5.00203	0.964512	0.661433	1.03679	1.51187
GTAACATGCGATATCATAC	4632434I11Rik_CCDS40022.1_ex0_7:92859613-92859635:+_5-2	4632434I11Rik	7.97086	14.7387	4.68738	4.49484	1.84908	0.958924	0.540811	1.04283
GGTAGATCATCCCAAATCA	4632434I11Rik_CCDS40022.1_ex0_7:92859482-92859504:+_5-1	4632434I11Rik	3.50848	17.2612	8.89242	9.93918	4.91986	1.11771	0.203258	0.894683
GCGGGAAGAGTTTCGGAGG	4732456N10Rik_CCDS27855.1_ex8_15:101562686-101562708:-_5-5	4732456N10Rik	14.5548	10.3853	16.745	11.2626	0.713529	0.672596	1.40149	1.48678
ATGGGCTCTAGATTGGTCC	4732456N10Rik_CCDS27855.1_ex7_15:101560533-101560555:+_5-1	4732456N10Rik	19.8361	16.3655	23.8012	18.6089	0.825034	0.781848	1.21207	1.27902
GCGGCATAGGATACAGAGT	4732456N10Rik_CCDS27855.1_ex8_15:101562539-101562561:-_5-3	4732456N10Rik	6.15237	4.63556	2.73617	2.80686	0.753458	1.02583	1.32721	0.974818
GTCTGGGTGTCAGCGGCAT	4732456N10Rik_CCDS27855.1_ex8_15:101562551-101562573:-_5-4	4732456N10Rik	22.5252	17.9462	23.3313	26.7318	0.796716	1.14575	1.25515	0.872791
CTCCAGCGGGTTCGAAAGG	4732456N10Rik_CCDS27855.1_ex8_15:101562399-101562421:-_5-2	4732456N10Rik	6.12658	12.1306	8.27122	11.8491	1.98	1.43257	0.505052	0.698049
ATGTTCACGCGACCCGTGA	4833403I15Rik_CCDS50284.1_ex0_18:46850559-46850581:-_5-2	4833403I15Rik	14.6709	14.798	21.2049	8.69499	1.00866	0.410046	0.99141	2.43875
CAAGGTACGTTGGCATGCG	4833403I15Rik_CCDS50284.1_ex2_18:46866460-46866482:-_5-4	4833403I15Rik	17.1471	22.866	24.1516	12.5623	1.33352	0.520143	0.749895	1.92255
CGATTCGTCAAATATCAAC	4833403I15Rik_CCDS50284.1_ex4_18:46876932-46876954:-_5-5	4833403I15Rik	5.83639	8.92314	9.70475	6.41264	1.52888	0.660773	0.654074	1.51338
AGACTTGGGACCTCCGTCG	4833403I15Rik_CCDS50284.1_ex0_18:46850433-46850455:+_5-1	4833403I15Rik	4.52734	3.23929	3.2618	4.0352	0.715495	1.23711	1.39763	0.808337
GCCCTGGTAGCGACTCAAA	4833403I15Rik_CCDS50284.1_ex1_18:46864673-46864695:+_5-3	4833403I15Rik	1.0129	4.34577	5.44396	6.91983	4.29043	1.2711	0.233077	0.786719
TGCCGCCTGTCCAGAGGCG	4833420G17Rik_CCDS49373.1_ex2_13:119469960-119469982:+_5-4	4833420G17Rik	13.3876	12.1174	19.9227	8.90896	0.905122	0.447176	1.10482	2.23625
GTGTACGCATGGGTAAAGC	4833420G17Rik_CCDS49373.1_ex2_13:119469928-119469950:+_5-3	4833420G17Rik	9.7442	18.3216	12.8108	10.1611	1.88025	0.793168	0.531843	1.26077
AAGGTACGCGTGTCCATCC	4833420G17Rik_CCDS49373.1_ex2_13:119469610-119469632:-_5-2	4833420G17Rik	6.79078	17.4061	17.6609	15.97	2.5632	0.904256	0.390138	1.10588
ATGTACTCGGAGAGTGGCG	4833420G17Rik_CCDS49373.1_ex2_13:119469574-119469596:+_5-1	4833420G17Rik	14.7805	17.7025	14.7142	17.7689	1.19769	1.2076	0.834939	0.828086
AGTCACAATGCTACTCGCA	4833420G17Rik_CCDS49373.1_ex2_13:119470054-119470076:-_5-5	4833420G17Rik	11.711	13.8759	6.86954	11.9521	1.18486	1.73987	0.84398	0.574757
GTGGAGGTCTATGAAAAGC	4833423E24Rik_CCDS38168.1_ex11_2:85518619-85518641:-_5-4	4833423E24Rik	7.7645	6.7563	11.1463	8.83763	0.870152	0.792879	1.14922	1.26123
GGCAAATGGCAAGGGCAAC	4833423E24Rik_CCDS38168.1_ex11_2:85518596-85518618:-_5-3	4833423E24Rik	5.96537	6.49944	5.56343	5.22392	1.08953	0.938976	0.917828	1.06499
CAAGCATCCAGGTGGACGT	4833423E24Rik_CCDS38168.1_ex11_2:85518461-85518483:-_5-2	4833423E24Rik	8.27394	4.26015	10.6366	9.99465	0.514887	0.939652	1.94217	1.06422
TACAAATTTGTGCATCAGA	4833423E24Rik_CCDS38168.1_ex8_2:85500226-85500248:+_5-1	4833423E24Rik	21.4483	7.17123	11.9904	11.9759	0.33435	0.998783	2.99088	1.00122
ATGGGAATCCGACAGCAAA	4833423E24Rik_CCDS38168.1_ex11_2:85518645-85518667:-_5-5	4833423E24Rik	13.4908	18.506	12.1577	16.9606	1.37175	1.39505	0.728996	0.716822
CGTTCACTGTGAACGTGCA	4833424O15Rik_CCDS17796.1_ex0_3:117575798-117575820:+_5-1	4833424O15Rik	6.69405	14.8243	13.6788	7.50626	2.21455	0.54875	0.451558	1.82232
CAACAATCTCCAGTTAAAA	4833424O15Rik_CCDS17796.1_ex1_3:117621039-117621061:-_5-4	4833424O15Rik	2.79914	1	2.64857	2.04607	0.357253	0.772521	2.79914	1.29446
CCGGTGCTCCTCTACTCGC	4833424O15Rik_CCDS17796.1_ex0_3:117575887-117575909:+_5-3	4833424O15Rik	35.39	51.2524	38.3835	58.1299	1.44822	1.51445	0.690505	0.660305
GACGGTTCGGCGTACCAGT	4833424O15Rik_CCDS17796.1_ex1_3:117621070-117621092:-_5-5	4833424O15Rik	9.9828	5.01755	12.5161	20.8279	0.50262	1.66409	1.98957	0.60093
CCCGGGTAGGGCTTACGGT	4833424O15Rik_CCDS17796.1_ex0_3:117575841-117575863:-_5-2	4833424O15Rik	15.5156	8.59383	11.9745	22.2147	0.553882	1.85516	1.80544	0.539036
CTTTAGAGTTCCGCGCCAC	4833427G06Rik_CCDS40628.1_ex5_9:51101756-51101778:+_5-3	4833427G06Rik	14.9159	30.967	19.9466	8.33044	2.0761	0.417638	0.481671	2.39442
GCTAAGCAGTTTTGGCTCG	4833427G06Rik_CCDS40628.1_ex5_9:51101841-51101863:-_5-5	4833427G06Rik	23.4925	13.2371	20.5518	25.6224	0.56346	1.24672	1.77475	0.802106
GATTCGGTAGTGGGGTACA	4833427G06Rik_CCDS40628.1_ex5_9:51101815-51101837:+_5-4	4833427G06Rik	14.1034	6.28868	7.10846	9.0516	0.445898	1.27336	2.24267	0.785326
ACTTACTGTCCTGATCAAA	4833427G06Rik_CCDS40628.1_ex4_9:51101047-51101069:+_5-2	4833427G06Rik	12.8975	7.8035	9.70475	15.5737	0.605038	1.60475	1.65279	0.62315
TATCTTTGCTAAAGCCCAA	4833427G06Rik_CCDS40628.1_ex3_9:51100039-51100061:-_5-1	4833427G06Rik	3.52782	16.3918	8.08008	14.1156	4.64645	1.74696	0.215218	0.572424
AAGTATCAGCATCTTGACA	4833439L19Rik_CCDS26529.1_ex5_13:54561692-54561714:-_5-4	4833439L19Rik	9.1058	6.8485	14.4036	8.10063	0.752104	0.562404	1.3296	1.77808
GGGCGCTTACTTGTGATCA	4833439L19Rik_CCDS26529.1_ex4_13:54559187-54559209:+_5-3	4833439L19Rik	8.95103	7.36222	13.1134	7.83911	0.8225	0.597794	1.21581	1.67282
CTCCTCCTCCATCGGACAT	4833439L19Rik_CCDS26529.1_ex5_13:54561748-54561770:-_5-5	4833439L19Rik	9.27346	22.2864	16.8326	22.4524	2.40325	1.33387	0.416103	0.749701
TGGTGTGAGGATTCGGAGC	4833439L19Rik_CCDS26529.1_ex1_13:54552981-54553003:+_5-1	4833439L19Rik	10.6792	14.8441	5.65899	9.13877	1.39	1.61491	0.719427	0.619229
CATAAGGGCCTTACCACGG	4833439L19Rik_CCDS26529.1_ex3_13:54556562-54556584:-_5-2	4833439L19Rik	17.8242	38.3303	13.5355	22.4921	2.15046	1.66171	0.465016	0.601789
GGCCATAAGTTTTCAACCC	4921501E09Rik_CCDS28624.1_ex0_17:33067164-33067186:+_5-2	4921501E09Rik	6.30069	21.8847	5.55546	4.44729	3.47338	0.800526	0.287904	1.24918
ACTGGCATGGATCGCCTAG	4921501E09Rik_CCDS28624.1_ex0_17:33067615-33067637:-_5-5	4921501E09Rik	17.792	22.1547	12.3648	13.2597	1.24521	1.07238	0.803078	0.932509
CCCTTAACTACATGGTACC	4921501E09Rik_CCDS28624.1_ex0_17:33067041-33067063:+_5-1	4921501E09Rik	7.75161	12.1306	9.82422	11.0407	1.56491	1.12383	0.639013	0.889816
ATCTTGCTGCTAGCCTGAC	4921501E09Rik_CCDS28624.1_ex0_17:33067317-33067339:+_5-3	4921501E09Rik	22.8927	24.6838	14.2841	16.0968	1.07824	1.1269	0.92744	0.887391
AGGGCATGATGCTCTCAAG	4921501E09Rik_CCDS28624.1_ex0_17:33067596-33067618:-_5-4	4921501E09Rik	15.9348	2.96267	11.6321	13.6242	0.185925	1.17126	5.37852	0.853779
ATTATTACATCACTTCACG	4921504E06Rik_CCDS15716.1_ex14_2:19540391-19540413:-_5-3	4921504E06Rik	4.14043	11.3073	16.299	5.60431	2.73095	0.343843	0.366172	2.9083
GCGGGCAGGTCACCTGGAA	4921504E06Rik_CCDS15716.1_ex16_2:19553760-19553782:+_5-5	4921504E06Rik	11.524	12.8946	13.3842	9.32897	1.11893	0.697015	0.893708	1.43469
ATGCCATAGCTATTATCAA	4921504E06Rik_CCDS15716.1_ex13_2:19533772-19533794:-_5-2	4921504E06Rik	1	1	1	1	1	1	1	1
TTGAATAGTTCGCTGATCC	4921504E06Rik_CCDS15716.1_ex10_2:19516257-19516279:+_5-1	4921504E06Rik	11.1113	15.1405	12.8904	12.8951	1.36262	1.00037	0.73388	0.999632
AAAGATTTGACTCAATCCA	4921504E06Rik_CCDS15716.1_ex15_2:19542389-19542411:-_5-4	4921504E06Rik	10.3375	5.24148	8.26325	11.6192	0.507037	1.40613	1.97224	0.71117
GCTCGACGTAACCCACACC	4921506M07Rik_CCDS25927.1_ex0_12:57576352-57576374:+_5-3	4921506M07Rik	8.58347	4.69483	4.84666	3.54386	0.546962	0.731197	1.82828	1.36762
CGATATTGACGACAGCGCG	4921506M07Rik_CCDS25927.1_ex0_12:57576409-57576431:+_5-4	4921506M07Rik	21.9835	10.3062	19.2537	14.6544	0.468817	0.761123	2.13303	1.31385
CACGGGCGATTCTTGCGCG	4921506M07Rik_CCDS25927.1_ex0_12:57576332-57576354:-_5-2	4921506M07Rik	16.7022	23.8408	34.6164	30.401	1.42741	0.878225	0.700571	1.13866
TCCCGCGGACTGAACCGCT	4921506M07Rik_CCDS25927.1_ex0_12:57576136-57576158:-_5-1	4921506M07Rik	11.0275	13.3029	15.5504	15.1537	1.20635	0.97449	0.828949	1.02618
CCATCGCACGAGATCGCGC	4921506M07Rik_CCDS25927.1_ex0_12:57576461-57576483:-_5-5	4921506M07Rik	36.5378	25.7244	25.0993	38.0168	0.704049	1.51465	1.42036	0.660218
CGGCCTGTGTTCTTCGGGA	4921507P07Rik_CCDS20132.1_ex7_6:50591707-50591729:+_5-5	4921507P07Rik	31.0824	26.3896	36.0659	37.1213	0.849022	1.02926	1.17783	0.97157
CCCGCCAAATCCGTAATGC	4921507P07Rik_CCDS20132.1_ex7_6:50591650-50591672:+_5-4	4921507P07Rik	23.6924	14.8046	22.1925	23.6649	0.624867	1.06635	1.60034	0.937778
CCGACCTTTACATCGCCTA	4921507P07Rik_CCDS20132.1_ex4_6:50584436-50584458:-_5-3	4921507P07Rik	17.6694	13.6191	13.4877	16.0254	0.77077	1.18815	1.2974	0.841643
CCTCCTACGGTGCCAACCA	4921507P07Rik_CCDS20132.1_ex4_6:50584373-50584395:-_5-1	4921507P07Rik	7.20348	11.1756	4.63163	5.61224	1.55142	1.21172	0.644572	0.825273
TGGGTACGAGCTTTAATGC	4921507P07Rik_CCDS20132.1_ex4_6:50584404-50584426:+_5-2	4921507P07Rik	11.1564	15.5686	8.12786	16.1681	1.39548	1.98922	0.716599	0.502711
GATTCATTGGGCAAACTGA	4921509C19Rik_CCDS38271.1_ex1_2:151472614-151472636:+_3-1	4921509C19Rik	14.2324	5.06366	10.4136	4.43144	0.355784	0.425545	2.81069	2.34993
CCCAAATGTTCCTTGGCCA	4921509C19Rik_CCDS38271.1_ex1_2:151473648-151473670:+_3-3	4921509C19Rik	17.5921	16.6355	16.0362	17.6896	0.945627	1.10311	1.0575	0.906531
TTCAATTTCGGGTTGGACA	4921509C19Rik_CCDS38271.1_ex1_2:151473549-151473571:+_3-2	4921509C19Rik	8.14497	10.3458	10.1985	14.6624	1.2702	1.43769	0.787277	0.695558
ATTTAGGCGAATCAGTGAC	4921511H03Rik_CCDS19078.1_ex0_5:7305058-7305080:+_5-3	4921511H03Rik	5.40434	8.2777	8.49421	5.31902	1.53168	0.626193	0.65288	1.59695
GGTGCAGGTAATTGGTACG	4921511H03Rik_CCDS19078.1_ex0_5:7304896-7304918:-_5-1	4921511H03Rik	11.3692	12.0977	13.3603	11.8015	1.06407	0.883328	0.939787	1.13208
TTCTAGTGGGCTACATACA	4921511H03Rik_CCDS19078.1_ex0_5:7304971-7304993:+_5-2	4921511H03Rik	8.96393	6.00548	5.69882	5.71526	0.66996	1.00289	1.49263	0.997123
GTCATCTAGGTACAAAACG	4921511H03Rik_CCDS19078.1_ex0_5:7305279-7305301:-_5-5	4921511H03Rik	5.82995	9.46321	5.22097	7.47457	1.62321	1.43164	0.616065	0.698498
ATCCGGAAGAGTGTGCCAT	4921511H03Rik_CCDS19078.1_ex0_5:7305128-7305150:-_5-4	4921511H03Rik	16.9537	11.7749	9.5614	25.1231	0.694537	2.62756	1.43981	0.380582
CCTCAGTCTGTATGACCAC	4921517D22Rik_CCDS36688.1_ex1_13:59690754-59690776:+_5-5	4921517D22Rik	17.7081	24.6311	19.2218	12.4434	1.39095	0.647358	0.718933	1.54474
CTTCGTAGAACAGCCTGCC	4921517D22Rik_CCDS36688.1_ex1_13:59690481-59690503:+_5-1	4921517D22Rik	26.9295	13.3622	20.966	20.0275	0.496192	0.955236	2.01535	1.04686
TACATTGCTCCATTGGATC	4921517D22Rik_CCDS36688.1_ex1_13:59690668-59690690:-_5-4	4921517D22Rik	1	1	1	1	1	1	1	1
GAAAGTCGAGTATAGGAGG	4921517D22Rik_CCDS36688.1_ex1_13:59690607-59690629:+_5-2	4921517D22Rik	6.0105	7.95498	5.92181	5.93715	1.32351	1.00259	0.755565	0.997416
GGAGGAGGGATACCGGCCT	4921517D22Rik_CCDS36688.1_ex1_13:59690621-59690643:+_5-3	4921517D22Rik	13.2586	6.57847	12.978	15.019	0.496165	1.15726	2.01546	0.864106
CTAATAAATATGTAACCAC	4921524J17Rik_CCDS22498.1_ex2_8:85426909-85426931:+_5-5	4921524J17Rik	1.8641	1.00659	2.91138	1.94305	0.539984	0.667398	1.85191	1.49836
TTTCACAATTACCTGTAGA	4921524J17Rik_CCDS22498.1_ex2_8:85426847-85426869:+_5-3	4921524J17Rik	5.41079	5.43907	3.4609	3.00498	1.00523	0.868263	0.994801	1.15172
TCGTCTGATATGATCTGAA	4921524J17Rik_CCDS22498.1_ex1_8:85412164-85412186:+_5-1	4921524J17Rik	3.28923	6.22282	2.03533	1.85588	1.89188	0.911831	0.528575	1.09669
AGAAATCACCGCCGTCTAC	4921524J17Rik_CCDS22498.1_ex2_8:85426859-85426881:-_5-4	4921524J17Rik	9.04131	20.8507	13.4558	14.282	2.30615	1.0614	0.433622	0.942156
CATACAGAAAACAAGCACG	4921524J17Rik_CCDS22498.1_ex1_8:85412281-85412303:-_5-2	4921524J17Rik	5.30762	4.20746	6.5669	8.94858	0.792721	1.36268	1.26148	0.733848
TCTTAGGTGGAGGCAGCAC	4921524L21Rik_CCDS50216.1_ex4_18:6626316-6626338:+_5-1	4921524L21Rik	22.0415	8.72556	16.5937	9.44784	0.395869	0.569363	2.52609	1.75635
GGAGAACCGGGGGCGACAA	4921524L21Rik_CCDS50216.1_ex4_18:6626340-6626362:+_5-2	4921524L21Rik	10.7308	4.9978	7.8093	8.42554	0.465742	1.07891	2.14711	0.92686
GCTGCATCGTGGAGTCAGA	4921524L21Rik_CCDS50216.1_ex4_18:6626370-6626392:+_5-3	4921524L21Rik	12.3301	24.203	15.1283	18.2523	1.96293	1.2065	0.509443	0.828844
TCATGTTCAAATCATGGGG	4921524L21Rik_CCDS50216.1_ex5_18:6629502-6629524:+_5-4	4921524L21Rik	9.78934	8.11305	6.20852	7.98175	0.828763	1.28561	1.20662	0.777839
TGGTGCTTCTTGTTAGATA	4921524L21Rik_CCDS50216.1_ex5_18:6629590-6629612:-_5-5	4921524L21Rik	11.6078	4.31284	7.12439	9.17047	0.371545	1.28719	2.69146	0.776883
CATCGAGGAGCGACGAGCC	4921530D09Rik_CCDS50533.1_ex7_2:25612144-25612166:-_5-2	4921530D09Rik	1	1	3.22198	2.06192	1	0.639955	1	1.56261
ATGGACGTATCCTTTCCGC	4921530D09Rik_CCDS50533.1_ex11_2:25616562-25616584:+_5-5	4921530D09Rik	17.3148	18.5258	20.082	14.0839	1.06994	0.701318	0.934632	1.42589
CACCAGATTATCCGCCAAC	4921530D09Rik_CCDS50533.1_ex9_2:25615498-25615520:-_5-3	4921530D09Rik	4.508	10.0889	13.1214	12.1106	2.238	0.922967	0.446828	1.08346
ACACGGCGGTACTTCTCGC	4921530D09Rik_CCDS50533.1_ex7_2:25612066-25612088:+_5-1	4921530D09Rik	9.67327	9.22611	8.21547	8.30667	0.953773	1.0111	1.04847	0.989021
TCAGGTTGGTTCCGTAAGC	4921530D09Rik_CCDS50533.1_ex10_2:25616175-25616197:+_5-4	4921530D09Rik	12.7879	11.2546	7.52259	10.4464	0.8801	1.38867	1.13623	0.720116
AACTGGTTGTCCATCCGAA	4921530L21Rik_CCDS27307.1_ex0_14:95882032-95882054:-_5-2	4921530L21Rik	8.04179	6.57847	12.0064	7.1655	0.818036	0.596808	1.22244	1.67558
GAGAACCCAAAACTGTCGG	4921530L21Rik_CCDS27307.1_ex0_14:95882123-95882145:+_5-4	4921530L21Rik	13.149	17.7157	21.7783	15.3835	1.3473	0.706369	0.742226	1.41569
GTTCTGCTGCCGTAGGATG	4921530L21Rik_CCDS27307.1_ex0_14:95882069-95882091:-_5-3	4921530L21Rik	23.3312	17.7288	15.861	13.5529	0.759875	0.854479	1.31601	1.1703
ACAACGCCTTGAGCACAGA	4921530L21Rik_CCDS27307.1_ex0_14:95882151-95882173:+_5-5	4921530L21Rik	29.9861	17.6103	19.3413	22.5713	0.587281	1.167	1.70276	0.856898
GCGTTGAGAGATGAAAACA	4921530L21Rik_CCDS27307.1_ex0_14:95881946-95881968:+_5-1	4921530L21Rik	1.74803	5.06366	1.33449	2.90988	2.89678	2.18051	0.345211	0.458608
CGGAAGTTCGAACCAGAAG	4921536K21Rik_CCDS24368.1_ex2_11:3894938-3894960:+_5-4	4921536K21Rik	3.03129	5.55762	6.0572	2.09362	1.83342	0.345642	0.545429	2.89317
GCACAGCGTATCTGCGAGA	4921536K21Rik_CCDS24368.1_ex1_11:3890041-3890063:-_5-1	4921536K21Rik	12.2849	9.14707	10.533	9.43199	0.744577	0.895469	1.34304	1.11673
CCAAGTTGTTATTCAGGTG	4921536K21Rik_CCDS24368.1_ex2_11:3894834-3894856:-_5-3	4921536K21Rik	19.8619	14.4358	14.077	13.0457	0.726805	0.926736	1.37589	1.07906
AATAATCACCCGAGATAAA	4921536K21Rik_CCDS24368.1_ex1_11:3890077-3890099:+_5-2	4921536K21Rik	1	1	1	1	1	1	1	1
TGGGCTCGGATTACAGGAA	4921536K21Rik_CCDS24368.1_ex2_11:3894975-3894997:-_5-5	4921536K21Rik	8.61571	2.77168	6.27223	6.9753	0.3217	1.11209	3.10848	0.899205
TAATTTGTGTACCTGTAAA	4921539E11Rik_CCDS51247.1_ex3_4:103242748-103242770:+_5-3	4921539E11Rik	1.01935	5.34028	5.13336	2.8544	5.23893	0.556049	0.190879	1.7984
GAATCCAATGCTAGTAAGA	4921539E11Rik_CCDS51247.1_ex3_4:103242785-103242807:-_5-4	4921539E11Rik	2.63793	4.29308	6.21648	4.72466	1.62744	0.760021	0.61446	1.31575
GAGTGGTCTGTAGAATGCA	4921539E11Rik_CCDS51247.1_ex2_4:103236951-103236973:+_5-2	4921539E11Rik	12.156	6.22282	9.57733	7.71231	0.511916	0.805267	1.95345	1.24182
GGGGGAAATGCCCTCCAAA	4921539E11Rik_CCDS51247.1_ex1_4:103235791-103235813:-_5-1	4921539E11Rik	1.00645	1	1	1.00792	0.993593	1.00792	1.00645	0.992138
GGTGTTTAGACCAAAGCTG	4921539E11Rik_CCDS51247.1_ex3_4:103242856-103242878:+_5-5	4921539E11Rik	10.7437	5.99889	11.417	18.9259	0.558362	1.65769	1.79095	0.603249
CATCTTCGGCTATCCACCA	4922501C03Rik_CCDS52879.1_ex24_9:87248389-87248411:+_5-5	4922501C03Rik	14.284	17.09	14.1726	8.51272	1.19644	0.600646	0.83581	1.66488
GATCGATTCCTATGGGATC	4922501C03Rik_CCDS52879.1_ex16_9:87231401-87231423:-_5-3	4922501C03Rik	9.15739	3.11416	11.1861	10.2562	0.34007	0.91687	2.94057	1.09067
ACGTCTCTACCACCGAGTC	4922501C03Rik_CCDS52879.1_ex17_9:87231978-87232000:-_5-4	4922501C03Rik	31.1533	19.2041	20.8704	20.289	0.616439	0.972141	1.62222	1.02866
AGCCTTTGGGATCCTACGG	4922501C03Rik_CCDS52879.1_ex12_9:87221303-87221325:-_5-1	4922501C03Rik	41.6451	33.4039	53.5073	56.6876	0.802109	1.05944	1.24671	0.943897
ATGGTTTATTCGAAGCTGC	4922501C03Rik_CCDS52879.1_ex13_9:87222123-87222145:+_5-2	4922501C03Rik	12.4526	7.6125	10.1189	11.4449	0.611319	1.13104	1.63581	0.88414
CCCGCCTAGGAGGCAAGAG	4922501L14Rik_CCDS51099.1_ex3_3:154727513-154727535:+_5-4	4922501L14Rik	6.73919	14.2579	13.5116	9.75691	2.11567	0.722114	0.472663	1.38482
CGGTGCTTGAACTCGCAGC	4922501L14Rik_CCDS51099.1_ex3_3:154727484-154727506:-_5-3	4922501L14Rik	25.0981	27.2195	25.1471	21.2241	1.08452	0.843997	0.922066	1.18484
GAACCTTTGTGTCTACAAA	4922501L14Rik_CCDS51099.1_ex2_3:154720241-154720263:+_5-1	4922501L14Rik	2.47026	2.02744	6.63858	6.34132	0.820738	0.955222	1.21842	1.04688
AGGACAACGCTGTTAAATA	4922501L14Rik_CCDS51099.1_ex4_3:154733605-154733627:+_5-5	4922501L14Rik	1	2.0011	1	1	2.0011	1	0.499726	1
CGCTTGGAGATAAACTGAA	4922501L14Rik_CCDS51099.1_ex3_3:154727397-154727419:-_5-2	4922501L14Rik	1.87055	4.97804	4.32899	5.45374	2.66127	1.25982	0.375761	0.793766
TGGAGTTCGCAGGTGTCGT	4922502D21Rik_CCDS20583.1_ex2_6:129326695-129326717:+_5-2	4922502D21Rik	16.225	14.0867	25.4498	19.2984	0.86821	0.758293	1.15179	1.31875
TATCCAACATAAAAACTCG	4922502D21Rik_CCDS20583.1_ex2_6:129326725-129326747:-_5-3	4922502D21Rik	1	1	1	1	1	1	1	1
AAAGCTGTGCCCTAAAGAC	4922502D21Rik_CCDS20583.1_ex2_6:129326776-129326798:-_5-4	4922502D21Rik	6.43611	10.1943	9.51362	11.4449	1.58392	1.203	0.631346	0.831254
TTCATCGACAAAACTGAAG	4922502D21Rik_CCDS20583.1_ex2_6:129326655-129326677:-_5-1	4922502D21Rik	1.01935	5.472	3.21402	4.04313	5.36815	1.25797	0.186284	0.794934
CCCTTTGGACCCTGCTAGG	4922502D21Rik_CCDS20583.1_ex3_6:129330995-129331017:-_5-5	4922502D21Rik	19.2816	14.0011	26.732	40.3784	0.726137	1.51049	1.37715	0.662038
GCTTCCCGGATGTACTGCA	4922505E12Rik_CCDS15589.1_ex0_1:182748688-182748710:+_5-2	4922505E12Rik	68.3226	59.2875	59.0582	46.5597	0.867757	0.788369	1.1524	1.26844
CGGTTACTCCTATTCTGGG	4922505E12Rik_CCDS15589.1_ex0_1:182748511-182748533:+_5-1	4922505E12Rik	27.5034	14.6333	20.4404	17.3885	0.532055	0.850695	1.87951	1.17551
GGCGCCGAGATCGAGACCG	4922505E12Rik_CCDS15589.1_ex0_1:182748969-182748991:-_5-5	4922505E12Rik	13.4714	5.89351	15.0009	15.0903	0.437482	1.00596	2.28581	0.994074
GGTCATATACCCACGCCGG	4922505E12Rik_CCDS15589.1_ex0_1:182748906-182748928:+_5-4	4922505E12Rik	17.3986	14.0933	13.9735	15.9779	0.810023	1.14344	1.23453	0.874553
AAGACCCTCGGACCGAGCC	4922505E12Rik_CCDS15589.1_ex0_1:182748847-182748869:-_5-3	4922505E12Rik	1	1	1.74066	2.27589	1	1.30749	1	0.764825
TAAGATTAAGCAAGAGCGG	4930402F06Rik_CCDS38108.1_ex0_2:35376183-35376205:-_5-1	4930402F06Rik	16.1218	4.46432	9.42601	3.73406	0.276912	0.396144	3.61126	2.52433
CGATCAACCCCACGGTAAC	4930402F06Rik_CCDS38108.1_ex1_2:35380398-35380420:+_5-4	4930402F06Rik	20.984	10.2009	18.9192	16.9368	0.486126	0.895216	2.05708	1.11705
CGACTTCTCCTATATGCCA	4930402F06Rik_CCDS38108.1_ex0_2:35376240-35376262:-_5-3	4930402F06Rik	17.9467	18.585	17.4618	20.5901	1.03557	1.17915	0.965655	0.848066
TTGGTCCACACAATCGGAG	4930402F06Rik_CCDS38108.1_ex1_2:35380463-35380485:+_5-5	4930402F06Rik	21.1774	9.97034	18.6405	22.6902	0.4708	1.21725	2.12404	0.821521
GGTAGATCTGAGTCGCCAT	4930402F06Rik_CCDS38108.1_ex0_2:35376219-35376241:-_5-2	4930402F06Rik	15.464	11.7552	12.1577	17.8798	0.760163	1.47066	1.31551	0.679967
GCGCTCAGGTTGTCCCGTG	4930402H24Rik_CCDS16750.1_ex27_2:130791927-130791949:+_5-2	4930402H24Rik	29.1801	24.4862	20.6793	15.5103	0.839142	0.750042	1.19169	1.33326
AGGACCAGTGTTGCGCACC	4930402H24Rik_CCDS16750.1_ex27_2:130791875-130791897:+_5-1	4930402H24Rik	21.3451	11.6959	25.9993	20.2097	0.547944	0.777318	1.82501	1.28647
GGCGGTGTTTGAGCATCAG	4930402H24Rik_CCDS16750.1_ex29_2:130798239-130798261:-_5-3	4930402H24Rik	8.53833	13.1712	15.3035	14.8367	1.5426	0.969497	0.648257	1.03146
GGTCAGGACACTTTGAACC	4930402H24Rik_CCDS16750.1_ex35_2:130822463-130822485:+_5-5	4930402H24Rik	7.70002	11.6432	8.27918	10.6762	1.5121	1.28952	0.66133	0.775481
TTCGAGACTGTAGTAGGAT	4930402H24Rik_CCDS16750.1_ex32_2:130812865-130812887:-_5-4	4930402H24Rik	9.64747	7.11854	2.60875	5.31109	0.737865	2.03588	1.35526	0.491188
CCGGATGCTGGAAAATAAG	4930402K13Rik_CCDS57728.1_ex0_X:9105161-9105183:+_5-4	4930402K13Rik	7.15189	5.44565	4.78294	1.98268	0.761428	0.41453	1.31332	2.41237
ACTATGGTAAGGAACGATC	4930402K13Rik_CCDS57728.1_ex0_X:9104836-9104858:+_5-1	4930402K13Rik	1.00645	4.27332	2.36982	1	4.24594	0.421972	0.235519	2.36982
GCCATATTGGGAAGATCAC	4930402K13Rik_CCDS57728.1_ex0_X:9105182-9105204:+_5-5	4930402K13Rik	2.7411	12.9341	14.4991	9.09915	4.71858	0.627565	0.211928	1.59346
CCCATATGGTTCTACGTGG	4930402K13Rik_CCDS57728.1_ex0_X:9105034-9105056:-_5-3	4930402K13Rik	15.0449	11.1163	18.4095	13.3944	0.738878	0.72758	1.3534	1.37442
TGGCCGGACTGTCAAAAGC	4930402K13Rik_CCDS57728.1_ex0_X:9105012-9105034:-_5-2	4930402K13Rik	14.3098	7.35564	9.45787	13.6321	0.51403	1.44135	1.94541	0.693792
GATTGGGAGCATCCCAAGT	4930404A10Rik_CCDS48798.1_ex5_11:54394630-54394652:+_5-4	4930404A10Rik	6.97778	1	5.36432	3.91633	0.143312	0.730069	6.97778	1.36973
ACTGAGCTTCAACCTGGCA	4930404A10Rik_CCDS48798.1_ex0_11:54370784-54370806:-_5-1	4930404A10Rik	27.1359	21.5554	27.8868	26.6684	0.79435	0.956311	1.25889	1.04568
ACTCTGCATTTGAACAACT	4930404A10Rik_CCDS48798.1_ex4_11:54390502-54390524:-_5-2	4930404A10Rik	3.38595	6.49944	6.57487	6.31754	1.91953	0.960863	0.520961	1.04073
ATCGCCAGAACTGTTCAGA	4930404A10Rik_CCDS48798.1_ex4_11:54390563-54390585:+_5-3	4930404A10Rik	4.23716	2.21844	4.66348	7.36362	0.523567	1.579	1.90997	0.633314
CAGAGAGGTTTGCAAACTG	4930404A10Rik_CCDS48798.1_ex5_11:54394721-54394743:-_5-5	4930404A10Rik	8.16431	10.708	6.19259	13.2517	1.31156	2.13994	0.762451	0.467304
GCTTTCAGAGTCGCCAGCG	4930404N11Rik_CCDS24056.1_ex2_10:81364753-81364775:-_5-1	4930404N11Rik	14.0325	13.6718	9.19505	2.31552	0.974294	0.251822	1.02638	3.97106
GGCGTGAATTTCCAGCGCA	4930404N11Rik_CCDS24056.1_ex2_10:81364905-81364927:+_5-4	4930404N11Rik	12.6009	14.9824	7.80134	6.11942	1.18899	0.784407	0.841047	1.27485
GCGTGTGGGCCTCGCGGTA	4930404N11Rik_CCDS24056.1_ex2_10:81364786-81364808:+_5-2	4930404N11Rik	30.9083	31.1448	38.3994	40.0614	1.00765	1.04328	0.992405	0.958514
TGATGGCCGGCGCCCAACG	4930404N11Rik_CCDS24056.1_ex2_10:81364933-81364955:+_5-5	4930404N11Rik	32.198	36.3676	33.8121	37.2956	1.1295	1.10303	0.885347	0.906596
CGGCCGCATCCCGTCCCAT	4930404N11Rik_CCDS24056.1_ex2_10:81364885-81364907:+_5-3	4930404N11Rik	30.1344	45.8715	37.9215	47.7405	1.52223	1.25893	0.656932	0.794326
ATACCAGCGTGGGTCGACC	4930407I10Rik_CCDS49678.1_ex1_15:82063076-82063098:+_5-2	4930407I10Rik	5.96537	15.292	19.0705	10.5652	2.56346	0.554009	0.390098	1.80503
GTGATATGACCCACGGGAC	4930407I10Rik_CCDS49678.1_ex1_15:82064091-82064113:+_5-5	4930407I10Rik	5.63004	5.35345	10.3021	6.60284	0.950872	0.640924	1.05167	1.56025
ACTTGCATAGTACCGAGCC	4930407I10Rik_CCDS49678.1_ex1_15:82063814-82063836:+_5-3	4930407I10Rik	6.31359	3.23271	8.95613	10.9456	0.512024	1.22214	1.95303	0.818238
AATGATTCACGGACCAAAA	4930407I10Rik_CCDS49678.1_ex1_15:82063981-82064003:+_5-4	4930407I10Rik	7.06161	3.12733	5.87403	9.2735	0.442863	1.57873	2.25803	0.633421
AGTCCTCTTAACCAACAAT	4930407I10Rik_CCDS49678.1_ex1_15:82062623-82062645:+_5-1	4930407I10Rik	5.30762	2.1394	4.78294	9.04368	0.403082	1.89082	2.48088	0.528872
GCGCTAACCGAATGTCCAA	4930412D23Rik_CCDS59775.1_ex0_X:127721577-127721599:+_5-1	4930412D23Rik	16.8247	15.9835	20.512	12.9665	0.950003	0.632139	1.05263	1.58193
ATCATGGTAGGAGTAGTGC	4930412D23Rik_CCDS59775.1_ex0_X:127721608-127721630:+_5-3	4930412D23Rik	6.4619	10.4709	10.8118	10.1928	1.6204	0.942749	0.61713	1.06073
CAAAGGAACGAGGGCATCA	4930412D23Rik_CCDS59775.1_ex0_X:127721593-127721615:+_5-2	4930412D23Rik	17.6307	13.2963	20.7111	20.4554	0.754157	0.987652	1.32598	1.0125
TGGTATTTCGAGGAACCCA	4930412D23Rik_CCDS59775.1_ex0_X:127721716-127721738:-_5-5	4930412D23Rik	1	1	1	1	1	1	1	1
GCTTTTATAGGTATGTGGA	4930412D23Rik_CCDS59775.1_ex0_X:127721677-127721699:-_5-4	4930412D23Rik	1.85121	11.4193	5.58732	6.1749	6.16857	1.10516	0.162112	0.904844
AGGTCACTTACGTATACAG	4930415F15Rik_CCDS48752.1_ex1_11:11495446-11495468:-_5-1	4930415F15Rik	8.02245	7.28319	9.28266	4.28087	0.907852	0.461169	1.1015	2.1684
AGTTTAGAGTGCCTAGGAC	4930415F15Rik_CCDS48752.1_ex2_11:11496466-11496488:-_5-4	4930415F15Rik	8.18366	6.40065	8.90834	8.04515	0.782125	0.903103	1.27857	1.10729
CAGACTTGATATCTCCGTA	4930415F15Rik_CCDS48752.1_ex2_11:11496441-11496463:-_5-3	4930415F15Rik	5.33986	5.41931	4.91833	6.41264	1.01488	1.30382	0.985339	0.766975
TCAGTATACAAACTCAAGC	4930415F15Rik_CCDS48752.1_ex2_11:11496487-11496509:+_5-5	4930415F15Rik	9.82158	18.1767	5.92977	12.0076	1.85069	2.02496	0.54034	0.493837
ACAATGTGGACAATCCCTA	4930415F15Rik_CCDS48752.1_ex2_11:11496426-11496448:+_5-2	4930415F15Rik	10.6599	3.36443	6.52708	13.8223	0.315616	2.11769	3.16841	0.472213
TAACAGTATAGGTGATGAA	4930415L06Rik_CCDS53129.1_ex0_X:89931573-89931595:-_5-2	4930415L06Rik	8.22235	6.59164	5.19708	2.80686	0.801674	0.540083	1.24739	1.85157
GTGGAAAAACGTAGGCACA	4930415L06Rik_CCDS53129.1_ex0_X:89932479-89932501:-_5-5	4930415L06Rik	7.30021	3.12074	10.6445	6.15905	0.427487	0.578612	2.33926	1.72827
ATGATTACCAAATTCAAGT	4930415L06Rik_CCDS53129.1_ex0_X:89931415-89931437:-_5-1	4930415L06Rik	7.97086	3.55543	5.92977	4.1937	0.446053	0.707227	2.24188	1.41397
CACTGTTCTTAGAAAATGA	4930415L06Rik_CCDS53129.1_ex0_X:89932051-89932073:-_5-4	4930415L06Rik	2.57989	1	4.79091	5.50129	0.387614	1.14828	2.57989	0.87087
AGAAGATTCGTTTGAAATA	4930415L06Rik_CCDS53129.1_ex0_X:89931696-89931718:+_5-3	4930415L06Rik	3.39885	5.08342	1	1.40417	1.49563	1.40417	0.668616	0.712167
TTCCCAAAAGTCCCCAATC	4930415O20Rik_CCDS49722.1_ex2_15:98588542-98588564:+_5-3	4930415O20Rik	3.92118	8.87704	7.99247	7.33984	2.26387	0.918344	0.441722	1.08892
CATCTTCTGAGATAATCGG	4930415O20Rik_CCDS49722.1_ex1_15:98585299-98585321:-_5-1	4930415O20Rik	13.7294	7.59274	6.38373	6.37302	0.553028	0.998322	1.80823	1.00168
TCTGGCGGTCCAACATCCC	4930415O20Rik_CCDS49722.1_ex2_15:98588603-98588625:+_5-4	4930415O20Rik	10.8791	7.53346	11.3135	12.3879	0.692469	1.09497	1.44411	0.913267
CTTTCTCTGGACGCACGCC	4930415O20Rik_CCDS49722.1_ex2_15:98588621-98588643:-_5-5	4930415O20Rik	34.1003	20.4753	26.4851	40.9093	0.600442	1.54462	1.66544	0.64741
TACCAGGAAGCTGTGCGAA	4930415O20Rik_CCDS49722.1_ex1_15:98585355-98585377:+_5-2	4930415O20Rik	27.1552	19.8825	7.72966	12.6732	0.73218	1.63956	1.36579	0.60992
ACCGATGACGAGCCTAAAG	4930422G04Rik_CCDS51066.1_ex4_3:127562857-127562879:+_5-1	4930422G04Rik	10.7373	5.46541	15.9805	7.64891	0.509013	0.478642	1.96459	2.08925
TGAAAGGATCCGCTACTAG	4930422G04Rik_CCDS51066.1_ex6_3:127573164-127573186:+_5-4	4930422G04Rik	6.32003	3.56201	9.73661	6.86436	0.563607	0.705005	1.77429	1.41843
TTTGGACTCGTCGCTGGAG	4930422G04Rik_CCDS51066.1_ex4_3:127563012-127563034:+_5-2	4930422G04Rik	15.0449	17.6827	20.082	20.7565	1.17533	1.03359	0.850824	0.967501
AACGGTTTCCGTTTCTAAG	4930422G04Rik_CCDS51066.1_ex8_3:127583622-127583644:+_5-5	4930422G04Rik	2.7669	7.41491	2.7521	3.22687	2.67987	1.17251	0.373153	0.85287
CACGCGAAACTTCTATGGC	4930422G04Rik_CCDS51066.1_ex5_3:127567639-127567661:-_5-3	4930422G04Rik	19.2429	5.26124	11.6878	20.709	0.273412	1.77184	3.65748	0.564384
TGTCTTGGCTCCTCGCCCG	4930427A07Rik_CCDS49196.1_ex2_12:113157274-113157296:+_5-3	4930427A07Rik	53.9553	52.372	36.3048	29.9572	0.970655	0.825159	1.03023	1.21189
CAGATCCACCTGTACACGC	4930427A07Rik_CCDS49196.1_ex4_12:113158065-113158087:+_5-5	4930427A07Rik	49.1382	40.9582	26.6922	28.6893	0.83353	1.07482	1.19972	0.930389
CACTAGTCGGAGATCCACG	4930427A07Rik_CCDS49196.1_ex3_12:113157625-113157647:-_5-4	4930427A07Rik	4.87556	4.8529	2.65653	3.16347	0.995351	1.19083	1.00467	0.839752
AGGTCGATCGAACTTGGCG	4930427A07Rik_CCDS49196.1_ex0_12:113156544-113156566:-_5-1	4930427A07Rik	6.32648	6.84192	8.42254	10.6683	1.08147	1.26663	0.924665	0.789495
CGAATAGCCTCACCGCCTC	4930427A07Rik_CCDS49196.1_ex0_12:113156563-113156585:-_5-2	4930427A07Rik	18.7657	38.5081	17.6211	24.1404	2.05205	1.36998	0.487317	0.72994
AGACCAAATGGATTGTAAG	4930428D18Rik_CCDS53116.1_ex0_X:76397503-76397525:-_5-5	4930428D18Rik	2.5412	4.6619	4.7272	1.54681	1.83453	0.327215	0.545099	3.05609
TGGTAGACTTAAAGACCAC	4930428D18Rik_CCDS53116.1_ex0_X:76397259-76397281:-_5-1	4930428D18Rik	3.55362	8.06694	8.17565	2.95743	2.27007	0.361736	0.440516	2.76445
CCTTTGGAATGTGTGTCAG	4930428D18Rik_CCDS53116.1_ex0_X:76397464-76397486:+_5-4	4930428D18Rik	30.9728	23.551	23.1163	14.9873	0.760378	0.648343	1.31514	1.54239
CACAGCATTTGTTGGCATG	4930428D18Rik_CCDS53116.1_ex0_X:76397278-76397300:+_5-2	4930428D18Rik	33.1137	34.0164	42.0629	34.1732	1.02726	0.812432	0.973462	1.23087
CATTCTGATATTCAATGGA	4930428D18Rik_CCDS53116.1_ex0_X:76397378-76397400:-_5-3	4930428D18Rik	1.83831	2.83754	4.62366	7.26852	1.54356	1.57203	0.647854	0.636122
CTTAAGTACAGTGCAAACA	4930430A15Rik_CCDS16514.1_ex13_2:111227933-111227955:-_5-3	4930430A15Rik	7.57105	1	11.6082	4.37597	0.132082	0.376973	7.57105	2.65271
ATCACCGTCGCTTGCAGCC	4930430A15Rik_CCDS16514.1_ex15_2:111229241-111229263:+_5-5	4930430A15Rik	19.0494	22.5828	26.286	18.8784	1.18549	0.718191	0.843536	1.39239
CCTTGAGAGCCAGTAAAAG	4930430A15Rik_CCDS16514.1_ex12_2:111225477-111225499:+_5-2	4930430A15Rik	5.12706	3.16026	3.08659	5.64394	0.616388	1.82853	1.62235	0.546887
CTCTTATATGCCATAAGAT	4930430A15Rik_CCDS16514.1_ex11_2:111220786-111220808:-_5-1	4930430A15Rik	1	3.33808	1.74862	3.92425	3.33808	2.24419	0.299573	0.445594
GTATATATACCTTCATCAG	4930430A15Rik_CCDS16514.1_ex14_2:111228241-111228263:+_5-4	4930430A15Rik	1	3.12733	1.54156	3.77368	3.12733	2.44797	0.319762	0.408502
GTCCGTTTTCATCAGGCAC	4930430F08Rik_CCDS24151.1_ex3_10:100578323-100578345:+_5-3	4930430F08Rik	28.9092	11.8342	16.753	17.127	0.409358	1.02232	2.44285	0.978163
GCGGTTGCAACAGAAAAAG	4930430F08Rik_CCDS24151.1_ex5_10:100586224-100586246:-_5-5	4930430F08Rik	9.7313	11.3403	8.19954	9.71729	1.16534	1.1851	0.85812	0.84381
TCTCTACTGGTACCCAACC	4930430F08Rik_CCDS24151.1_ex2_10:100577340-100577362:+_5-2	4930430F08Rik	15.2061	7.55322	7.46684	9.51124	0.496723	1.2738	2.01319	0.785055
GAGTTTCACTGGAACACTG	4930430F08Rik_CCDS24151.1_ex3_10:100578411-100578433:-_5-4	4930430F08Rik	6.57153	7.14488	7.8093	10.5177	1.08725	1.34682	0.919753	0.742492
AACCCCGGGATCATCAGGA	4930430F08Rik_CCDS24151.1_ex2_10:100577245-100577267:+_5-1	4930430F08Rik	17.6759	34.4906	12.1896	21.652	1.95128	1.77628	0.512484	0.562975
CTACGGGCTCAGGTCTAAC	4930432K09Rik_CCDS39134.1_ex2_5:87842963-87842985:-_5-4	4930432K09Rik	14.6322	7.77057	9.94368	8.67914	0.53106	0.87283	1.88303	1.1457
GAATATCCCGTTTGGCCTA	4930432K09Rik_CCDS39134.1_ex2_5:87842667-87842689:+_5-1	4930432K09Rik	22.6413	10.5829	22.0411	25.8601	0.467415	1.17327	2.13943	0.852322
CACCTTCAGCAGGCATAGC	4930432K09Rik_CCDS39134.1_ex2_5:87842990-87843012:-_5-5	4930432K09Rik	16.9923	16.675	13.7585	19.1637	0.981327	1.39286	1.01903	0.717947
CATTCAATGGAGCATCAGC	4930432K09Rik_CCDS39134.1_ex2_5:87842852-87842874:-_5-3	4930432K09Rik	16.2379	6.31503	19.4687	28.4198	0.388907	1.45977	2.57131	0.685041
CTCCTTTTAACACTCAACA	4930432K09Rik_CCDS39134.1_ex2_5:87842717-87842739:+_5-2	4930432K09Rik	4.14688	2.5214	2.01144	7.46664	0.608024	3.71209	1.64467	0.26939
CTACACGAAGCTTTCAGGT	4930432K21Rik_CCDS52616.1_ex1_8:84159590-84159612:+_5-2	4930432K21Rik	12.2398	13.4742	18.2741	10.7713	1.10085	0.589428	0.908388	1.69656
CTCTTTGGGTGATCCTGCG	4930432K21Rik_CCDS52616.1_ex2_8:84161246-84161268:-_5-3	4930432K21Rik	31.1017	20.5214	25.2825	20.5267	0.659814	0.811894	1.51558	1.23169
CCTTTGAAAGGGTTCCATC	4930432K21Rik_CCDS52616.1_ex4_8:84166683-84166705:-_5-4	4930432K21Rik	14.9482	4.05598	6.91732	6.54736	0.271336	0.946517	3.68547	1.0565
CCTTCTGTAGAGCTAGGCG	4930432K21Rik_CCDS52616.1_ex1_8:84159560-84159582:+_5-1	4930432K21Rik	11.9496	10.9451	17.8759	21.8898	0.915938	1.22454	1.09178	0.816633
CTGCAACAGAGTGCTCCAC	4930432K21Rik_CCDS52616.1_ex4_8:84167078-84167100:+_5-5	4930432K21Rik	15.0255	13.2963	15.7336	19.544	0.884916	1.24219	1.13005	0.805032
TAATCCGTCATTGACAAAG	4930432M17Rik_CCDS57255.1_ex2_3:121679545-121679567:-_5-5	4930432M17Rik	7.01648	3.1866	3.97061	1.80041	0.45416	0.453433	2.20187	2.2054
CACCTTGTCCACCCAACAG	4930432M17Rik_CCDS57255.1_ex1_3:121674122-121674144:-_5-3	4930432M17Rik	12.0334	26.5345	21.2845	18.6802	2.20507	0.877643	0.453501	1.13942
CGCTACTCCCTGATGAGCC	4930432M17Rik_CCDS57255.1_ex1_3:121674076-121674098:-_5-2	4930432M17Rik	14.9482	15.6937	20.7908	19.4569	1.04988	0.935842	0.952494	1.06856
TGCGTAGAGCCTTCAAGAG	4930432M17Rik_CCDS57255.1_ex1_3:121674030-121674052:-_5-1	4930432M17Rik	7.21638	4.68166	8.07212	9.49539	0.648755	1.17632	1.54141	0.850109
AAAGCATGACGTGAAATCC	4930432M17Rik_CCDS57255.1_ex2_3:121679516-121679538:-_5-4	4930432M17Rik	2.7411	1	2.27425	2.96535	0.364817	1.30388	2.7411	0.766943
GCTAGAAGTTCCCAGATGC	4930433I11Rik_CCDS52207.1_ex1_7:40993997-40994019:-_5-5	4930433I11Rik	8.74468	7.72446	13.5036	8.53649	0.883333	0.632163	1.13208	1.58187
ACCACTTCTTCCCAGCATC	4930433I11Rik_CCDS52207.1_ex1_7:40993985-40994007:+_5-4	4930433I11Rik	40.7939	47.9922	35.4925	26.4624	1.17646	0.745577	0.85001	1.34124
AGCTTGGGGGGCATCCACC	4930433I11Rik_CCDS52207.1_ex1_7:40993295-40993317:+_5-1	4930433I11Rik	1.00645	3.31174	1	1	3.29052	1	0.303903	1
CCACCAATGTAGTGATATC	4930433I11Rik_CCDS52207.1_ex1_7:40993371-40993393:-_5-2	4930433I11Rik	4.85622	5.63007	6.34391	8.29082	1.15935	1.3069	0.862551	0.765172
TATCCGGCCAAGCCAATGC	4930435E12Rik_CCDS49850.1_ex3_16:38828573-38828595:-_5-4	4930435E12Rik	12.8717	18.9604	28.0461	17.8878	1.47303	0.637799	0.678873	1.56789
TTGGATCATCTGAGCCAAC	4930435E12Rik_CCDS49850.1_ex3_16:38828603-38828625:-_5-5	4930435E12Rik	12.1688	22.9648	17.0238	12.1502	1.88718	0.71372	0.529891	1.40111
GCTGATAAATAGTCAGTGC	4930435E12Rik_CCDS49850.1_ex3_16:38828281-38828303:+_5-2	4930435E12Rik	7.62909	10.6553	13.862	11.3973	1.39667	0.8222	0.71599	1.21625
CTTAGTGAGGATCTAGAAA	4930435E12Rik_CCDS49850.1_ex3_16:38828193-38828215:-_5-1	4930435E12Rik	2.85718	1.00659	1.86012	3.36159	0.352301	1.80719	2.83848	0.553346
AGAGCGCAGACTATCTGAG	4930435E12Rik_CCDS49850.1_ex3_16:38828443-38828465:-_5-3	4930435E12Rik	13.1555	7.50053	7.4987	15.1379	0.570146	2.01873	1.75394	0.495361
TCCGGGCTACTTCAGAATG	4930444A02Rik_CCDS22204.1_ex1_8:25986339-25986361:-_5-4	4930444A02Rik	9.83448	9.62127	10.9073	5.16845	0.978321	0.473851	1.02216	2.11037
TCTCTACAGAGTGAGCACG	4930444A02Rik_CCDS22204.1_ex0_8:25983524-25983546:-_5-3	4930444A02Rik	7.55815	3.66081	5.93774	4.77221	0.484352	0.803708	2.06461	1.24423
CATGACCCTCGTGCCCAGG	4930444A02Rik_CCDS22204.1_ex0_8:25983320-25983342:+_5-1	4930444A02Rik	11.2016	31.0263	28.3726	23.2291	2.76982	0.818715	0.361035	1.22143
TCCGCGGTGGATCGTCCAG	4930444A02Rik_CCDS22204.1_ex1_8:25986375-25986397:+_5-5	4930444A02Rik	39.8588	15.0944	41.0514	33.8562	0.378696	0.824728	2.64064	1.21252
AGGTTGCTCAAGGAACCTA	4930444A02Rik_CCDS22204.1_ex0_8:25983447-25983469:+_5-2	4930444A02Rik	8.07403	1.99451	6.50319	5.81828	0.247028	0.894681	4.04813	1.11772
GCTTGGAGCCTGATTTACC	4930444G20Rik_CCDS48519.1_ex0_10:22067394-22067416:-_5-1	4930444G20Rik	4.06305	5.93303	7.36331	2.64043	1.46024	0.358593	0.684819	2.78867
AAGCGGCCCTATTCCGTCA	4930444G20Rik_CCDS48519.1_ex0_10:22067722-22067744:-_5-3	4930444G20Rik	21.6675	9.86496	13.647	10.3592	0.455288	0.759083	2.19641	1.31738
TCGGGAGCTCTTGATCTCG	4930444G20Rik_CCDS48519.1_ex0_10:22067880-22067902:+_5-5	4930444G20Rik	12.343	5.82106	13.5434	11.0011	0.47161	0.812282	2.1204	1.2311
GATCCTTCGGTCAACTCTA	4930444G20Rik_CCDS48519.1_ex0_10:22067795-22067817:+_5-4	4930444G20Rik	3.99212	3.85839	5.98552	6.57906	0.966503	1.09916	1.03466	0.909783
TTTGGTCTAGAAGAGCCCA	4930444P10Rik_CCDS56622.1_ex2_1:16078677-16078699:-_5-4	4930444P10Rik	4.36613	3.97036	9.71272	5.42204	0.909353	0.558241	1.09968	1.79134
TCTGTTTGAGAGCAGTTGG	4930444P10Rik_CCDS56622.1_ex3_1:16080864-16080886:-_5-5	4930444P10Rik	16.3217	17.8408	15.9645	21.1766	1.09307	1.32648	0.914853	0.753878
GGTCACCTACCTGATGGGA	4930444P10Rik_CCDS56622.1_ex2_1:16078557-16078579:+_5-2	4930444P10Rik	18.5787	23.6234	12.2851	22.1672	1.27153	1.80439	0.786451	0.554204
CACAAGCGCCTGCTGCACA	4930444P10Rik_CCDS56622.1_ex2_1:16078590-16078612:-_5-3	4930444P10Rik	22.5058	13.3425	13.5514	25.3609	0.592844	1.87145	1.68678	0.534344
CAGGAGAAGTCAAAAGGTA	4930444P10Rik_CCDS56622.1_ex1_1:16068794-16068816:-_5-1	4930444P10Rik	1.00645	1.94182	1.56545	5.34279	1.92938	3.41294	0.518302	0.293002
CTCCATTTTACAAAAAGAA	4930447A16Rik_CCDS56981.1_ex1_15:37429820-37429842:+_5-5	4930447A16Rik	5.48173	5.14928	9.91978	5.0575	0.939353	0.50984	1.06456	1.9614
TGGAGCTATAAATTCACCA	4930447A16Rik_CCDS56981.1_ex0_15:37425776-37425798:+_5-3	4930447A16Rik	7.41628	14.8507	16.1238	8.94858	2.00244	0.554991	0.49939	1.80183
ATTGCATGAAGGATGCCAC	4930447A16Rik_CCDS56981.1_ex0_15:37425721-37425743:-_5-1	4930447A16Rik	8.12562	12.6575	9.0517	7.72023	1.55773	0.852905	0.641961	1.17246
ATATTATTTATTTCTGAAT	4930447A16Rik_CCDS56981.1_ex0_15:37425757-37425779:+_5-2	4930447A16Rik	1	1	1	1	1	1	1	1
CCTCTTTGCCAGAAATCCC	4930447A16Rik_CCDS56981.1_ex0_15:37425793-37425815:-_5-4	4930447A16Rik	7.51946	9.09438	9.11541	14.9001	1.20945	1.63461	0.826825	0.611768
TCAACCAAATTACAATCAA	4930447C04Rik_CCDS25971.1_ex5_12:72898506-72898528:-_5-2	4930447C04Rik	5.48817	3.19978	3.00695	1	0.583031	0.332563	1.71517	3.00695
GCTATAAACAAAGTAGATG	4930447C04Rik_CCDS25971.1_ex14_12:72915408-72915430:-_5-5	4930447C04Rik	1	1	2.53707	1	1	0.394155	1	2.53707
GAATCAAAATGTAGTACAC	4930447C04Rik_CCDS25971.1_ex4_12:72894983-72895005:-_5-1	4930447C04Rik	1	1	1	1	1	1	1	1
TTCTTGGTAAGCAGTAAGC	4930447C04Rik_CCDS25971.1_ex13_12:72913201-72913223:+_5-4	4930447C04Rik	8.27394	9.02193	9.09948	10.066	1.0904	1.10621	0.917091	0.903984
ATTTAGTCAGAGATGGGAA	4930447C04Rik_CCDS25971.1_ex11_12:72909783-72909805:+_5-3	4930447C04Rik	4.33389	3.19319	1.35042	4.31257	0.736795	3.1935	1.35723	0.313136
TGCTAGGCACCCATGGGCT	4930451C15Rik_CCDS28006.2_ex7_16:17559864-17559886:-_5-5	4930451C15Rik	26.1815	10.9583	26.3975	21.7075	0.41855	0.822332	2.3892	1.21605
TGGCACAACACTATTGGCC	4930451C15Rik_CCDS28006.2_ex7_16:17559805-17559827:+_5-4	4930451C15Rik	6.75853	7.55981	8.9402	7.59344	1.11856	0.849359	0.894009	1.17736
AATTGAACCTTCGGCACCG	4930451C15Rik_CCDS28006.2_ex7_16:17559750-17559772:-_5-3	4930451C15Rik	15.8445	12.2557	15.0168	12.8397	0.773501	0.855019	1.29282	1.16956
GATAATGCTGTTCTTACGC	4930451C15Rik_CCDS28006.2_ex6_16:17559249-17559271:+_5-1	4930451C15Rik	17.9145	16.3457	22.2323	26.9537	0.912431	1.21237	1.09597	0.824831
TTCCAGGGGGTCCGGGCAT	4930451C15Rik_CCDS28006.2_ex6_16:17559363-17559385:-_5-2	4930451C15Rik	36.6475	21.1207	26.9391	33.9038	0.576321	1.25854	1.73514	0.794573
TTTACAACTTGCTGGGGTC	4930451I11Rik_CCDS52402.1_ex2_7:126830966-126830988:+_5-5	4930451I11Rik	13.4586	19.4149	11.7515	7.32399	1.44257	0.623238	0.693208	1.60452
GGCTAGCTCGGTCTGAGTC	4930451I11Rik_CCDS52402.1_ex2_7:126830925-126830947:+_5-4	4930451I11Rik	11.6788	8.5609	20.7987	20.5188	0.733032	0.98654	1.3642	1.01364
GGCTTCTCTCCAATAAACC	4930451I11Rik_CCDS52402.1_ex2_7:126830891-126830913:+_5-2	4930451I11Rik	11.5369	6.17013	9.21098	9.36859	0.534817	1.01711	1.8698	0.983176
CTATAACGTTCGTTAAGAC	4930451I11Rik_CCDS52402.1_ex2_7:126830871-126830893:-_5-1	4930451I11Rik	3.26988	3.8057	2.73617	4.05105	1.16387	1.48055	0.859206	0.675423
AAACCGGGCCACAGCAAGA	4930451I11Rik_CCDS52402.1_ex2_7:126830905-126830927:+_5-3	4930451I11Rik	1.0129	6.23599	2.79989	5.27147	6.15659	1.88275	0.162428	0.531139
CTTATTCTCCTTCGGTAAC	4930452B06Rik_CCDS26814.1_ex13_14:8659395-8659417:+_5-5	4930452B06Rik	3.4182	2.25137	11.0188	9.93918	0.658642	0.902018	1.51827	1.10863
CACATCGCCTTCGGATCCA	4930452B06Rik_CCDS26814.1_ex8_14:8518686-8518708:-_5-2	4930452B06Rik	14.7031	24.1701	20.512	21.5569	1.64387	1.05094	0.608319	0.951528
GATGATTCCATCCAACGAC	4930452B06Rik_CCDS26814.1_ex10_14:8558106-8558128:+_5-3	4930452B06Rik	17.3212	10.7409	13.0099	14.3533	0.620102	1.10326	1.61264	0.906402
TCTAGTTGGACTGATCCAG	4930452B06Rik_CCDS26814.1_ex12_14:8644453-8644475:-_5-4	4930452B06Rik	12.0592	9.06145	15.6619	22.2781	0.751413	1.42244	1.33083	0.703018
TGGCAGACGGAATAACCTA	4930452B06Rik_CCDS26814.1_ex8_14:8518642-8518664:-_5-1	4930452B06Rik	8.35132	7.67836	4.69534	8.61574	0.919419	1.83496	1.08764	0.544972
ATATACCTGCTTAAAGAGC	4930453N24Rik_CCDS28265.1_ex1_16:64768917-64768939:+_5-2	4930453N24Rik	1.00645	4.50383	4.40067	3.2031	4.47498	0.727866	0.223465	1.37388
GCCTACCTTGGCGGTCCAC	4930453N24Rik_CCDS28265.1_ex2_16:64770730-64770752:+_5-5	4930453N24Rik	21.2548	17.4588	33.5572	27.35	0.821404	0.815025	1.21743	1.22696
TGTCCTCCGTCTTTGTAAC	4930453N24Rik_CCDS28265.1_ex1_16:64768940-64768962:+_5-3	4930453N24Rik	5.75256	4.16135	8.06415	7.87873	0.723391	0.977007	1.38238	1.02353
CTTAAATATGACTTCTCGG	4930453N24Rik_CCDS28265.1_ex1_16:64769076-64769098:+_5-4	4930453N24Rik	8.08048	19.7376	8.71721	8.63951	2.44263	0.991087	0.409395	1.00899
CTTGAGGTGGGCCCAAAAA	4930453N24Rik_CCDS28265.1_ex0_16:64766875-64766897:+_5-1	4930453N24Rik	15.2448	12.4994	12.747	20.5901	0.819914	1.61529	1.21964	0.619085
GATAAGTAATTGTACAAGA	4930468A15Rik_CCDS53117.1_ex0_X:76582995-76583017:+_5-1	4930468A15Rik	1	1	3.71576	1	1	0.269124	1	3.71576
TAACACATCCGGTTAAAGG	4930468A15Rik_CCDS53117.1_ex0_X:76583232-76583254:+_5-4	4930468A15Rik	4.53379	7.72446	16.4822	10.4384	1.70375	0.633316	0.58694	1.57899
GGGCAACTCGAATATCCAG	4930468A15Rik_CCDS53117.1_ex0_X:76583182-76583204:+_5-3	4930468A15Rik	2.34129	8.77825	7.64205	6.18282	3.74932	0.809052	0.266715	1.23601
ATTGAACTCAGGGAGACTC	4930468A15Rik_CCDS53117.1_ex0_X:76583091-76583113:-_5-2	4930468A15Rik	51.7692	48.0647	30.9689	34.8548	0.92844	1.12548	1.07708	0.888512
ACTAAGGTCATGCCATGCT	4930468A15Rik_CCDS53117.1_ex0_X:76583295-76583317:+_5-5	4930468A15Rik	12.5171	3.46981	12.6913	17.7927	0.277206	1.40196	3.60742	0.713288
GCTGAAATGGTTGTTAAGT	4930474N05Rik_CCDS49448.1_ex1_14:36095357-36095379:+_5-3	4930474N05Rik	1	1.80351	5.18911	2.93365	1.80351	0.565348	0.554474	1.76882
GTTACCCCCCTACAGGTAC	4930474N05Rik_CCDS49448.1_ex1_14:36095456-36095478:+_5-4	4930474N05Rik	17.721	19.2305	18.5449	12.7842	1.08518	0.689364	0.921508	1.45061
TTCTGGTCTTGCTTACCCT	4930474N05Rik_CCDS49448.1_ex0_14:36095137-36095159:-_5-2	4930474N05Rik	7.52591	12.8419	11.1781	8.61574	1.70636	0.770769	0.586043	1.29741
CTCTTGCCTTCAACGCCTG	4930474N05Rik_CCDS49448.1_ex0_14:36095086-36095108:+_5-1	4930474N05Rik	40.4263	41.3665	45.0972	35.3461	1.02326	0.783776	0.97727	1.27587
TCTATGCTCAACAGAATGA	4930474N05Rik_CCDS49448.1_ex2_14:36096412-36096434:-_5-5	4930474N05Rik	2.63148	1	2.91138	4.27294	0.380015	1.46767	2.63148	0.681353
GTGTGCATCTATAATAAAG	4930480E11Rik_CCDS53120.1_ex0_X:78370241-78370263:-_5-5	4930480E11Rik	1.74803	1	2.59282	1	0.572073	0.385681	1.74803	2.59282
AGAAGACCACAATACAAGT	4930480E11Rik_CCDS53120.1_ex0_X:78369985-78370007:+_5-2	4930480E11Rik	1	1	1	1	1	1	1	1
CAATTTCAATGGGTCAGCA	4930480E11Rik_CCDS53120.1_ex0_X:78369959-78369981:+_5-1	4930480E11Rik	18.411	13.2766	26.1665	29.1648	0.721122	1.11458	1.38673	0.897197
GGAATTTTCAGGGGGATGC	4930480E11Rik_CCDS53120.1_ex0_X:78370159-78370181:-_5-4	4930480E11Rik	22.1576	23.1492	15.2318	23.134	1.04475	1.51879	0.957164	0.658418
TGATCAGAATCTGAAAAAG	4930480E11Rik_CCDS53120.1_ex0_X:78370074-78370096:+_5-3	4930480E11Rik	3.57296	7.50053	1.56545	5.47751	2.09925	3.499	0.476361	0.285796
TCGAAGGCAGAAGATCAAG	4930486L24Rik_CCDS26583.1_ex4_13:60853606-60853628:-_5-4	4930486L24Rik	2.79269	12.2162	6.20055	3.13177	4.37436	0.50508	0.228605	1.97989
GCACTAAAAGCCCAACTAG	4930486L24Rik_CCDS26583.1_ex3_13:60853292-60853314:+_5-3	4930486L24Rik	11.3176	4.49066	6.04127	4.31257	0.396784	0.713851	2.52026	1.40085
GTGCAACTGGATCCCTAGA	4930486L24Rik_CCDS26583.1_ex3_13:60853275-60853297:-_5-2	4930486L24Rik	10.2536	6.2821	5.45193	6.39679	0.61267	1.17331	1.6322	0.852291
AATGGCGGCCTCGCAACTG	4930486L24Rik_CCDS26583.1_ex3_13:60853123-60853145:-_5-1	4930486L24Rik	19.2622	22.5433	15.5982	18.7278	1.17034	1.20064	0.854454	0.83289
AATTCGTGAAAATGATGAC	4930486L24Rik_CCDS26583.1_ex4_13:60853631-60853653:-_5-5	4930486L24Rik	1.01935	3.04829	1.01593	3.92425	2.99044	3.86273	0.334399	0.258884
CCAGTCTCAACGTCAGCAC	4930502E18Rik_CCDS30136.1_ex1_X:53727448-53727470:-_5-2	4930502E18Rik	16.3475	10.7607	9.60919	7.60929	0.658246	0.791876	1.51919	1.26282
ACAAACAGGGAGTTGTGGC	4930502E18Rik_CCDS30136.1_ex1_X:53727384-53727406:+_5-1	4930502E18Rik	15.8832	15.9769	14.6425	14.2106	1.0059	0.970508	0.994134	1.03039
AAACCTTATAATGGTGACC	4930502E18Rik_CCDS30136.1_ex3_X:53736279-53736301:+_5-5	4930502E18Rik	2.46382	1	2.80785	3.40122	0.405875	1.21132	2.46382	0.825543
GACTGCGTTCAATCCACGA	4930502E18Rik_CCDS30136.1_ex1_X:53727524-53727546:-_5-3	4930502E18Rik	19.791	15.2788	18.1547	23.0547	0.772006	1.26991	1.29533	0.787459
ATGCTGACTACAATGGTCA	4930502E18Rik_CCDS30136.1_ex2_X:53733805-53733827:+_5-4	4930502E18Rik	6.50059	13.1844	9.84014	18.2523	2.02818	1.85488	0.493052	0.539118
GGATTACGACAGGTCCCGA	4930503B20Rik_CCDS38667.1_ex1_3:146650942-146650964:-_5-5	4930503B20Rik	8.58347	16.7673	10.5489	10.8347	1.95344	1.02709	0.511919	0.973628
GGGTCATCAGAATAAGACC	4930503B20Rik_CCDS38667.1_ex1_3:146650648-146650670:+_5-1	4930503B20Rik	7.73226	1.01317	4.27324	5.1209	0.131032	1.19836	7.63173	0.834471
CCCGATGGAACCGAAACAA	4930503B20Rik_CCDS38667.1_ex1_3:146650928-146650950:-_5-4	4930503B20Rik	11.9625	15.8254	10.3897	16.5247	1.32292	1.59049	0.755903	0.628736
GCTCTTCTGGACCCAGTAA	4930503B20Rik_CCDS38667.1_ex1_3:146650738-146650760:+_5-2	4930503B20Rik	2.48961	6.94071	3.85115	7.07833	2.78787	1.83798	0.358697	0.544076
CAGCAGAGATGAAACCGAT	4930503B20Rik_CCDS38667.1_ex1_3:146650855-146650877:-_5-3	4930503B20Rik	5.1464	6.20306	3.53258	7.18927	1.20532	2.03513	0.829655	0.491368
TCATGTTGTGATTTGATGA	4930503E14Rik_CCDS36890.1_ex1_14:44169258-44169280:+_4-1	4930503E14Rik	11.4015	11.3139	11.3454	7.45872	0.992321	0.657425	1.00774	1.52109
AATGAAATCATTCTGGGAA	4930503E14Rik_CCDS36890.1_ex3_14:44171178-44171200:-_4-4	4930503E14Rik	5.57845	11.1822	5.87403	5.39034	2.00453	0.917657	0.498869	1.08973
CAGAAAGATAAATGCTGAG	4930503E14Rik_CCDS36890.1_ex2_14:44170335-44170357:-_4-3	4930503E14Rik	1	3.35126	2.45743	3.37744	3.35126	1.37438	0.298396	0.727601
TGTTTGGTCGGTGATCAGG	4930503L19Rik_CCDS29333.1_ex5_18:70468352-70468374:+_5-3	4930503L19Rik	17.16	10.2931	24.1038	12.7604	0.599829	0.529393	1.66714	1.88895
AAATTGGATACTTAACGTC	4930503L19Rik_CCDS29333.1_ex5_18:70468019-70468041:+_5-1	4930503L19Rik	1.81251	2.58068	4.79091	2.90988	1.42381	0.607375	0.702341	1.64643
TCGGGTATATGTACGTAGC	4930503L19Rik_CCDS29333.1_ex6_18:70469453-70469475:+_5-4	4930503L19Rik	4.31454	7.00657	5.33247	4.1937	1.62394	0.786446	0.615785	1.27154
TGAACACTGACGGTGAGAT	4930503L19Rik_CCDS29333.1_ex6_18:70469493-70469515:-_5-5	4930503L19Rik	10.8147	13.6783	13.1134	13.648	1.2648	1.04077	0.790641	0.960829
GCTCGAGAACTATCCAAGA	4930503L19Rik_CCDS29333.1_ex5_18:70468090-70468112:-_5-2	4930503L19Rik	3.54717	2.31723	1.92383	3.25064	0.653262	1.68967	1.53078	0.591832
ATTACGATGAACGAGATAG	4930504O13Rik_CCDS24731.1_ex1_11:58447465-58447487:-_5-5	4930504O13Rik	1	1	4.34492	1	1	0.230154	1	4.34492
GCACCTGTGTTTATGATGC	4930504O13Rik_CCDS24731.1_ex1_11:58447316-58447338:+_5-2	4930504O13Rik	16.7666	19.1185	18.1706	12.9902	1.14027	0.714904	0.876985	1.39879
CACATGCTTCACCGTGAAG	4930504O13Rik_CCDS24731.1_ex1_11:58447400-58447422:-_5-4	4930504O13Rik	20.9066	6.06475	15.4628	11.2547	0.290088	0.727857	3.44723	1.3739
TGGAACACCACTTGAGCTC	4930504O13Rik_CCDS24731.1_ex1_11:58447365-58447387:+_5-3	4930504O13Rik	14.3162	16.5565	16.6733	12.6257	1.15649	0.757238	0.864688	1.32059
GGGACGTTGTTGACACCTG	4930504O13Rik_CCDS24731.1_ex0_11:58446385-58446407:+_5-1	4930504O13Rik	21.0743	31.0329	25.2188	22.1751	1.47255	0.879307	0.679095	1.13726
CACTTTTGGTGTCATAAGA	4930505A04Rik_CCDS48764.1_ex2_11:30446313-30446335:+_5-3	4930505A04Rik	5.41079	9.43686	11.6241	9.55086	1.74408	0.821643	0.573368	1.21707
AATAAAGGGCCAGAAAAGC	4930505A04Rik_CCDS48764.1_ex3_11:30454670-30454692:-_5-4	4930505A04Rik	8.82851	3.0944	3.98654	3.28234	0.3505	0.823358	2.85306	1.21454
GCAAAACCAATGGGCATGC	4930505A04Rik_CCDS48764.1_ex2_11:30446268-30446290:+_5-2	4930505A04Rik	8.02889	8.40284	12.4683	10.6524	1.04657	0.85436	0.955498	1.17047
TCCCTACATTGATAATAAA	4930505A04Rik_CCDS48764.1_ex3_11:30454683-30454705:-_5-5	4930505A04Rik	1	1	1	1	1	1	1	1
TTAGTTCCACTTACCAGTC	4930505A04Rik_CCDS48764.1_ex1_11:30427152-30427174:-_5-1	4930505A04Rik	17.4889	4.08891	7.24385	10.3513	0.2338	1.42897	4.27715	0.699803
ATGCTATACATGGCCAAAC	4930506M07Rik_CCDS50480.1_ex10_19:59038333-59038355:-_5-4	4930506M07Rik	4.4822	3.29857	8.93224	4.24125	0.735925	0.474825	1.35883	2.10604
TCTCCTCTGTAATTACGTC	4930506M07Rik_CCDS50480.1_ex10_19:59038308-59038330:+_5-3	4930506M07Rik	4.24361	4.27332	7.61816	3.74198	1.007	0.491192	0.993048	2.03586
TACTCTTCAACAGCCAACA	4930506M07Rik_CCDS50480.1_ex7_19:59028224-59028246:+_5-1	4930506M07Rik	6.90685	6.17672	6.48726	4.90693	0.894288	0.756395	1.11821	1.32206
TCACATATGGTTATAGAGG	4930506M07Rik_CCDS50480.1_ex11_19:59041933-59041955:-_5-5	4930506M07Rik	16.8505	8.01425	7.25181	8.061	0.47561	1.11158	2.10256	0.899617
AAGGTGTTAGCCATCGAGC	4930506M07Rik_CCDS50480.1_ex9_19:59035082-59035104:-_5-2	4930506M07Rik	16.1153	7.43467	12.301	14.7654	0.461341	1.20034	2.16759	0.8331
AGGAGTGCATACAGGAACC	4930511M11Rik_CCDS19067.1_ex3_5:3665312-3665334:-_5-3	4930511M11Rik	1.00645	3.22612	2.80785	1.87173	3.20545	0.666606	0.311969	1.50014
TTTGTACTCGCTTGCTGCA	4930511M11Rik_CCDS19067.1_ex4_5:3666816-3666838:+_5-4	4930511M11Rik	22.0673	15.8452	21.396	19.3063	0.718038	0.90233	1.39268	1.10824
AAAACACGTCTATTCGTAA	4930511M11Rik_CCDS19067.1_ex1_5:3662012-3662034:+_5-1	4930511M11Rik	1	1	1.87605	1.71323	1	0.913212	1	1.09504
GTTTGCGGGCACTTGGCGC	4930511M11Rik_CCDS19067.1_ex4_5:3666843-3666865:-_5-5	4930511M11Rik	14.1034	11.663	21.9456	22.9755	0.826962	1.04693	1.20925	0.955173
TAGCGAACCTGTAAGAAAG	4930511M11Rik_CCDS19067.1_ex3_5:3665276-3665298:+_5-2	4930511M11Rik	1	5.93303	3.92282	6.82473	5.93303	1.73975	0.168548	0.574795
ATCAAGTTTTCTGGGACTA	4930513O06Rik_CCDS57775.1_ex0_X:139090820-139090842:-_5-1	4930513O06Rik	8.82206	7.40833	10.6366	2.42646	0.83975	0.228125	1.19083	4.38356
ACCTCACAGTGATAGAGGA	4930513O06Rik_CCDS57775.1_ex0_X:139090870-139090892:+_5-3	4930513O06Rik	11.6336	8.0867	17.4697	16.8496	0.695115	0.964502	1.43861	1.0368
ATACTCTATTTGCTCAGTG	4930513O06Rik_CCDS57775.1_ex0_X:139090911-139090933:-_5-4	4930513O06Rik	12.6202	12.5126	14.1567	17.4598	0.99147	1.23333	1.0086	0.810815
CTTCTGTTTCCAATGCAAA	4930513O06Rik_CCDS57775.1_ex0_X:139090843-139090865:-_5-2	4930513O06Rik	9.20253	4.708	7.80134	14.5276	0.511599	1.8622	1.95466	0.536999
GAATACCTTGTAGAGTCCA	4930513O06Rik_CCDS57775.1_ex0_X:139090938-139090960:+_5-5	4930513O06Rik	16.7731	10.8134	5.21301	14.2186	0.644685	2.72752	1.55114	0.366633
AGTCATCCTGGAGAGCTCA	4930519G04Rik_CCDS19574.1_ex5_5:114874277-114874299:+_5-3	4930519G04Rik	7.93861	14.5806	9.99146	4.62956	1.83667	0.463352	0.544462	2.15819
TTGGATTGTCCAGAGGCAG	4930519G04Rik_CCDS19574.1_ex6_5:114877965-114877987:+_5-5	4930519G04Rik	13.0136	13.8825	15.5663	11.6826	1.06677	0.750507	0.93741	1.33243
[truncated: 88,231 more rows]
